# Supplementary material
Source: PubMed Central journal article supplement (PMC6625619)
Supplement: CJN.12251018SupplementaryData.pdf [file CJN.12251018SupplementaryData.pdf]

**SUPPLEMENTARY MATERIAL TABLE OF CONTENTS:**

**SUPPLEMENTARY TABLE 1:** Variables abstracted from the patient record

**SUPPLEMENTARY TABLE 2:** Published formulae for sodium correction rates and criteria for hyponatremic overcorrection

**SUPPLEMENTARY TABLE 3:** Summary of latent class analysis model fit with varying number of model classes

**SUPPLEMENTARY TABLE 4:** Prevalence of indicator criteria within each overcorrection group

**SUPPLEMENTARY TABLE 5:** Criteria response patterns and their overcorrection classification status in bootstrap analysis

**SUPPLEMENTARY TABLE 6:** Model validation populations

**SUPPLEMENTARY TABLE 1:** Variables abstracted from the patient record.

| <b>VARIABLE</b>       | <b>DEFINITION</b>                                                                                                      | <b>SOURCES</b>                                                                                                                                                                                           |
|-----------------------|------------------------------------------------------------------------------------------------------------------------|----------------------------------------------------------------------------------------------------------------------------------------------------------------------------------------------------------|
| Stroke                | Previous clinical diagnosis of stroke (not including transient ischemic attack) OR<br>Stroke diagnosed at presentation | Initial consult past medical history<br>Initial consult assessment<br>Previous neurology consults<br>Recent discharge summaries                                                                          |
| Dementia              | Previous diagnosis of dementia (did not distinguish between types)                                                     | Initial consult past medical history<br>Recent discharge summaries                                                                                                                                       |
| Parkinson's Disease   | Previous diagnosis of Parkinson's Disease                                                                              | Initial consult past medical history<br>Previous neurology consults<br>Recent discharge summaries                                                                                                        |
| Alcoholism            | >21 drinks/week for men<br>OR<br>>14 drinks/week for women<br>OR<br>Previous diagnosis of alcohol use disorder         | Initial consult past medical history<br>Initial consult social history<br>Social work consult<br>Recent discharge summary                                                                                |
| Cancer                | Histologically confirmed diagnosis of hematologic or solid malignancy<br>AND<br>No documented remission                | Initial consult past medical history<br>Hospital electronic medical record – Pathology<br>Recent discharge summary                                                                                       |
| Cirrhosis             | Previous clinical diagnosis of cirrhosis<br>AND<br>Imaging or pathology consistent with this diagnosis                 | Initial consult past medical history<br>Previous gastroenterology consults<br>Recent discharge summary<br>Hospital electronic medical record - Pathology<br>Hospital electronic medical record – Imaging |
| Hemodialysis          | On hemodialysis at presentation                                                                                        | Initial consult past medical history<br>Recent nephrology consults<br>Recent discharge summary                                                                                                           |
| Adrenal Insufficiency | Adrenal insufficiency on treatment<br>OR                                                                               | Initial consult past medical history<br>Recent endocrinology consult                                                                                                                                     |

|                                    |                                                                                                                                                                              |                                                                                                                                                           |
|------------------------------------|------------------------------------------------------------------------------------------------------------------------------------------------------------------------------|-----------------------------------------------------------------------------------------------------------------------------------------------------------|
|                                    | Adrenal insufficiency diagnosed at presentation                                                                                                                              | Recent discharge summary                                                                                                                                  |
| Clinical diagnosis<br>malnutrition | Physician or dietician diagnosis                                                                                                                                             | Initial consult past medical history<br>Initial consult assessment<br>Recent dietician consult                                                            |
| Hydrochlorothiazide                | Taking hydrochlorothiazide or chlorthalidone at presentation<br>AND<br>Non-adherence not documented                                                                          | Admission medication reconciliation<br>Initial consult note medications (if medication<br>reconciliation not available)                                   |
| Furosemide                         | Taking furosemide at presentation<br>AND<br>Non-adherence not documented                                                                                                     | Admission medication reconciliation<br>Initial consult note medications (if medication<br>reconciliation not available)                                   |
| Anti-convulsant                    | Taking one of a: carboxamide, valproate, GABA analog, hydantoin,<br>topiramate, pyrrolidine, succinimide, or triazine at presentation<br>AND<br>Non-adherence not documented | Admission medication reconciliation<br>Initial consult note medications (if medication<br>reconciliation not available)                                   |
| SSRI                               | Taking a selective-serotonin reuptake inhibitor at presentation<br>AND<br>Non-adherence not documented                                                                       | Admission medication reconciliation<br>Initial consult note medications (if medication<br>reconciliation not available)                                   |
| SNRI                               | Taking a serotonin-norepinephrine reuptake inhibitor at presentation<br>AND<br>Non-adherence not documented                                                                  | Admission medication reconciliation<br>Initial consult note medications (if medication<br>reconciliation not available)                                   |
| MDMA                               | Documented use of MDMA within 24 hours of presentation                                                                                                                       | Emergency department record of treatment<br>Initial consult social history<br>Initial consult history of presenting illness<br>Initial consult assessment |
| Vomiting                           | Witnessed or reported vomiting within 24 hours of presentation                                                                                                               | Emergency department record of treatment<br>Emergency department nursing flowsheet<br>Initial consult history of presenting illness                       |
| Systolic blood pressure            | First systolic blood pressure documented in emergency department                                                                                                             | Triage assessment<br>Emergency department record of treatment                                                                                             |

|                                 |                                                                                                                                                                                                                                                                                                                                                                                                                                 |                                                                                                                                                                 |
|---------------------------------|---------------------------------------------------------------------------------------------------------------------------------------------------------------------------------------------------------------------------------------------------------------------------------------------------------------------------------------------------------------------------------------------------------------------------------|-----------------------------------------------------------------------------------------------------------------------------------------------------------------|
| Baseline level of consciousness | First assessment of level of consciousness documented in emergency department<br>Normal – “normal”, “alert and oriented x 3”<br>Confused – “alert but not oriented”, “confused”<br>Decreased – “decreased”, “difficult to rouse”<br>Coma – “unresponsive”, “comatose”, “intubated due to LOC” AND GCS between 3 - 8                                                                                                             | Emergency department nursing flowsheet<br>Emergency department record of treatment<br>Emergency department nursing flowsheet<br>Initial consult physical exam   |
| Baseline volume status          | First assessment of volume status documented in emergency department<br>Volume deplete – “clinically dry”, “hypovolemic”, “intravascularly dry”, “flat JVP, dry mucous membranes, dry axilla”<br>Volume overloaded – “volume overloaded”, “hypervolemic”, OR 2/3 of: “elevated JVP”, “crackles to lung”, “peripheral edema”<br>Euvolemic – “euvolemic” or patient did not meet a phrase for either volume deplete or overloaded | Emergency department record of treatment<br>Initial consult physical exam<br>Initial consult assessment                                                         |
| Serum K+                        | First serum K+ after presentation                                                                                                                                                                                                                                                                                                                                                                                               | Hospital electronic medical record – Biochemistry                                                                                                               |
| Urine osmolarity                | First urine osmolarity after presentation                                                                                                                                                                                                                                                                                                                                                                                       | Hospital electronic medical record – Biochemistry                                                                                                               |
| Central nervous system bleed    | Presence of one of: epidural hematoma, subdural hematoma, subarachnoid hemorrhage, intracerebral hemorrhage                                                                                                                                                                                                                                                                                                                     | Hospital electronic medical record - Neuroimaging within 24 hours of presentation                                                                               |
| Significant chest tumour        | Documented intrathoracic cancer<br>AND<br>No documented remission                                                                                                                                                                                                                                                                                                                                                               | Initial consult past medical history<br>Pathology from index hospitalization<br>Recent discharge summary                                                        |
| Significant chest infection     | Chest X-ray or CT-thorax consistent with infectious process<br>AND<br>Physician decision to treat infection                                                                                                                                                                                                                                                                                                                     | Hospital electronic medical record – Thoracic imaging within 24 hours of presentation<br>Emergency department record of treatment<br>Initial consult assessment |

*Supplemental material is neither peer-reviewed nor thoroughly edited by CJASN. The authors alone are responsible for the accuracy and presentation of the material.*

**Supplementary Table 2.** Published formulae for sodium correction rates and criteria for hyponatremic overcorrection

| CRI-<br>TERION | OBSERVATION PERIOD (TIME<br>PERIOD OVER WHICH SODIUM<br>CORRECTION RATE WAS<br>CALCULATED)                                                                                                                                                                                                                                                                                                                  | COMPARATOR SODIUM                                                                                                                                                                                                                                                                                                                             | IMPUTAT<br>ION<br>METHOD | OVERCORRECTION THRESHOLD                                                                                                                                                                                                                                                                                          | EXAM-<br>PLE<br>REFER-<br>ENCES |
|----------------|-------------------------------------------------------------------------------------------------------------------------------------------------------------------------------------------------------------------------------------------------------------------------------------------------------------------------------------------------------------------------------------------------------------|-----------------------------------------------------------------------------------------------------------------------------------------------------------------------------------------------------------------------------------------------------------------------------------------------------------------------------------------------|--------------------------|-------------------------------------------------------------------------------------------------------------------------------------------------------------------------------------------------------------------------------------------------------------------------------------------------------------------|---------------------------------|
| A              | First 72 hours                                                                                                                                                                                                                                                                                                                                                                                              | Subsequent serum sodium                                                                                                                                                                                                                                                                                                                       | N/A                      | 0.5 mmol/L per hour                                                                                                                                                                                                                                                                                               | 16                              |
|                | Subjects and Methods – Paragraph 5:<br><br>“Data included age, gender and race, presumed etiology of SIADH, comorbid conditions, duration of hyponatraemia prior to treatment, vital signs, urine output, serum and urine sodium and serum and urine osmolality at initiation of treatment and every 6 hours for the first 24 hours, and daily for the ensuing 48 hours.”                                   | Inferred<br><br>For each serum sodium, the subsequent serum sodium served as its comparator (which is required if one wants to calculate rate corrections ‘at any point during the observation period’).                                                                                                                                      |                          | Endpoints – Paragraph 2:<br><br>“We defined rapid correction as any increase in serum sodium $\geq 12$ mmol/L after 24 hours of therapy or a rate of correction $\geq 0.5$ mmol/L/hour at any point during the observation period”                                                                                |                                 |
| B3             | 1 day                                                                                                                                                                                                                                                                                                                                                                                                       | End of observation period                                                                                                                                                                                                                                                                                                                     | Footnote €               | 8 mmd/L per day                                                                                                                                                                                                                                                                                                   | 17,18                           |
|                | Methods – Paragraph 4:<br><br>“Each patient received the first tolvaptan dose, and was evaluated after 6, 12 and 24 h by collecting data helpful in establishing water and Na <sup>+</sup> balance (such as urine output, weight, plasma and urine electrolytes concentration).”<br><br>Observation period then inferred to be 24h given that they use a 24h window to define the overcorrection threshold. | Figure 1<br><br>“The difference between the serial p[Na <sup>+</sup> ] measurements with respect to the baseline p[Na <sup>+</sup> ] was defined as $\Delta p[Na^+]$ and was used to describe the correction kinetics after tolvaptan administration”<br><br>“ $\Delta p[Na^+] =$ difference between the p[Na <sup>+</sup> ] measured at each |                          | Discussion – Paragraph 9:<br><br>“We observed a significant reduction in the occurrence of overcorrections in patients treated with 7.5 mg compared to the standard dose both with the conventional cut-off of 12 mEq/L/24 h (0.0 vs 41.7 %) and with the more restrictive one of 8 mEq/L/24 h (27.3 vs 75.0 %).” |                                 |

|    |                                                                                                                                                                                                                                                                                                                                                                                                                                                                                                            |                                                                                                                                                                                                                                                                                                                                                                         |            |                                                                                                                                                                                                                                                                                                                                         |       |
|----|------------------------------------------------------------------------------------------------------------------------------------------------------------------------------------------------------------------------------------------------------------------------------------------------------------------------------------------------------------------------------------------------------------------------------------------------------------------------------------------------------------|-------------------------------------------------------------------------------------------------------------------------------------------------------------------------------------------------------------------------------------------------------------------------------------------------------------------------------------------------------------------------|------------|-----------------------------------------------------------------------------------------------------------------------------------------------------------------------------------------------------------------------------------------------------------------------------------------------------------------------------------------|-------|
|    |                                                                                                                                                                                                                                                                                                                                                                                                                                                                                                            | reevaluation and the $p[Na^+]$ measured at baseline”                                                                                                                                                                                                                                                                                                                    |            |                                                                                                                                                                                                                                                                                                                                         |       |
| B5 | 1 day                                                                                                                                                                                                                                                                                                                                                                                                                                                                                                      | End of observation period                                                                                                                                                                                                                                                                                                                                               | Footnote € | 12 mmol/L per day                                                                                                                                                                                                                                                                                                                       | 16–24 |
|    | <p>Subjects and Methods – Paragraph 5:</p> <p>“Data included age, gender and race, presumed etiology of SIADH, comorbid conditions, duration of hyponatraemia prior to treatment, vital signs, urine output, serum and urine sodium and serum and urine osmolality at initiation of treatment and every 6 hours for the first 24 hours, and daily for the ensuing 48 hours.”</p> <p>Observation period then inferred to be 24h given that they use a 24h window to define the overcorrection threshold</p> | <p>Endpoints – Paragraph 1:</p> <p>“As a safety endpoint, we examined the rate correction of hyponatraemia. We defined rapid correction as any increase in serum sodium <math>\geq 12</math> mmol/L after 24 hours of therapy”</p>                                                                                                                                      |            | <p>Endpoints – Paragraph 1:</p> <p>“As a safety endpoint, we examined the rate correction of hyponatraemia. We defined rapid correction as any increase in serum sodium <math>\geq 12</math> mmol/L after 24 hours of therapy or a rate of correction <math>\geq 0.5</math> mmol/L/hour at any point during the observation period”</p> |       |
| C  | 2 days                                                                                                                                                                                                                                                                                                                                                                                                                                                                                                     | End of observation period                                                                                                                                                                                                                                                                                                                                               | Footnote € | 18 mmol/L per 2 days                                                                                                                                                                                                                                                                                                                    | 19–22 |
|    | <p>Statistical Methods – Paragraph 1</p> <p>“Overly rapid correction of <math>[Na^+]</math> was defined as an increase <math>&gt;12</math> mEq/L in any 24-hour interval or <math>&gt;18</math> mEq/L in any 48-hour interval.”</p> <p>Observation period then inferred to be 48h given that they use a 48h window to define the overcorrection threshold</p>                                                                                                                                              | <p>Statistical Methods – Paragraph 1</p> <p>“Overly rapid correction of <math>[Na^+]</math> was defined as ... or <math>&gt;18</math> mEq/L in any 48-hour interval.”</p> <p>“Rate of change of <math>[Na^+]</math> was calculated as the total increment in <math>[Na^+]</math> during the period the treatment was used divided by the number of treatment days.”</p> |            | <p>Statistical Methods – Paragraph 1</p> <p>“Overly rapid correction of <math>[Na^+]</math> was defined as an increase <math>&gt;12</math> mEq/L in any 24-hour interval or <math>&gt;18</math> mEq/L in any 48-hour interval.”</p>                                                                                                     |       |

|    |                                                                                                                                                                                                                                                                      |                                                                                                                                                                                                                                                                                                                                                                                                                                                                                |     |                                                                                                                                                                                                          |       |
|----|----------------------------------------------------------------------------------------------------------------------------------------------------------------------------------------------------------------------------------------------------------------------|--------------------------------------------------------------------------------------------------------------------------------------------------------------------------------------------------------------------------------------------------------------------------------------------------------------------------------------------------------------------------------------------------------------------------------------------------------------------------------|-----|----------------------------------------------------------------------------------------------------------------------------------------------------------------------------------------------------------|-------|
|    |                                                                                                                                                                                                                                                                      | Here, our observation period is 48h which allows us to define our comparator sodium                                                                                                                                                                                                                                                                                                                                                                                            |     |                                                                                                                                                                                                          |       |
| D  | 8 hours                                                                                                                                                                                                                                                              | Maximum Na value within observation period                                                                                                                                                                                                                                                                                                                                                                                                                                     | N/A | 8 mmol/L per 8 hours                                                                                                                                                                                     | 25,26 |
|    | <p>Results – Paragraph 5</p> <p>“Rapid corrections of serum sodium (defined as increase of <math>\geq 8</math> mmol/L in the first 8 h”</p> <p>Observation period then inferred to be 8h given that they use an 8h window to define the overcorrection threshold</p> | <p>Results – Paragraph 5</p> <p>“Rapid corrections of serum sodium (defined as increase of <math>\geq 8</math> mmol/L in the first 8 h”</p> <p>Sentence interpreted as saying that the observation window of 8 hours was inspected for any sodium value that was <math>\geq 8</math> mmol/L from baseline, thereby making the comparator sodium the maximum Na value within the observation period.</p> <p>Furthermore, Table 3 reports maximal increases in serum sodium.</p> |     | <p>Results – Paragraph 5</p> <p>“Rapid corrections of serum sodium (defined as increase of <math>\geq 8</math> mmol/L in the first 8 h or <math>\geq 12</math> mmol/L within the first 24 h)”</p>        |       |
| E3 | 1 day                                                                                                                                                                                                                                                                | Maximum Na value within observation period                                                                                                                                                                                                                                                                                                                                                                                                                                     | N/A | 8 mmol/L per day                                                                                                                                                                                         | 14,27 |
|    | <p>Materials and Methods – Paragraph 3</p> <p>“Secondary outcomes included alternative definitions of rapid correction: correction <math>&gt; 8</math> mEq/L at any point during the first 24 hours”</p>                                                             | <p>Materials and Methods – Paragraph 3</p> <p>“Secondary outcomes included alternative definitions of rapid correction: correction <math>&gt; 8</math> mEq/L at any point during the first 24 hours”</p> <p>Sentence interpreted as saying that the observation window of 24 hours was inspected for any sodium value that</p>                                                                                                                                                 |     | <p>Materials and Methods – Paragraph 3</p> <p>“Secondary outcomes included alternative definitions of rapid correction: correction <math>&gt; 8</math> mEq/L at any point during the first 24 hours”</p> |       |

|    |                                                                                                                                                                      |                                                                                                                                                                                                                                                                                                                                                                                                  |     |                                                                                                                                                                      |             |
|----|----------------------------------------------------------------------------------------------------------------------------------------------------------------------|--------------------------------------------------------------------------------------------------------------------------------------------------------------------------------------------------------------------------------------------------------------------------------------------------------------------------------------------------------------------------------------------------|-----|----------------------------------------------------------------------------------------------------------------------------------------------------------------------|-------------|
|    |                                                                                                                                                                      | was $\geq 8$ mmol/L from baseline, thereby making the comparator sodium the maximum Na value within the observation period.                                                                                                                                                                                                                                                                      |     |                                                                                                                                                                      |             |
| E4 | 1 day                                                                                                                                                                | Maximum Na value within observation period                                                                                                                                                                                                                                                                                                                                                       | N/A | 10 mmol/L per day                                                                                                                                                    | 28,29       |
|    | Study population – Paragraph 1<br><br>“A rapid rise in post-operative SNa was defined as a change in SNa $\geq 10$ mmol/L in the first 24 h.”                        | Study population – Paragraph 1<br><br>“A rapid rise in post-operative SNa was defined as a change in SNa $\geq 10$ mmol/L in the first 24 h.”<br><br>Sentence interpreted as saying that the observation window of 24 hours was inspected for any sodium value that was $\geq 10$ mmol/L from baseline, thereby making the comparator sodium the maximum Na value within the observation period. |     | Study population – Paragraph 1<br><br>“A rapid rise in post-operative SNa was defined as a change in SNa $\geq 10$ mmol/L in the first 24 h.”                        |             |
| E5 | 1 day                                                                                                                                                                | Maximum Na value within observation period                                                                                                                                                                                                                                                                                                                                                       | N/A | 12 mmol/L per day                                                                                                                                                    | 25,26,30–34 |
|    | Results – Paragraph 5<br><br>“Rapid corrections of serum sodium (defined as increase of $\geq 8$ mmol/L in the first 8 h or $\geq 12$ mmol/L within the first 24 h)” | Results – Paragraph 5<br><br>“Rapid corrections of serum sodium (defined as increase of $\geq 8$ mmol/L in the first 8 h or $\geq 12$ mmol/L within the first 24 h)”<br><br>Sentence interpreted as saying that the observation window of 24 hours was inspected for any sodium value that                                                                                                       |     | Results – Paragraph 5<br><br>“Rapid corrections of serum sodium (defined as increase of $\geq 8$ mmol/L in the first 8 h or $\geq 12$ mmol/L within the first 24 h)” |             |

|    |                                                                                                                                                                                                                                                                                                                                                                                                       |                                                                                                                                                                                                                                                                                                                                                                                                                                                                                                                                         |                |                                                                                                                                                                                                                                                                                                          |            |
|----|-------------------------------------------------------------------------------------------------------------------------------------------------------------------------------------------------------------------------------------------------------------------------------------------------------------------------------------------------------------------------------------------------------|-----------------------------------------------------------------------------------------------------------------------------------------------------------------------------------------------------------------------------------------------------------------------------------------------------------------------------------------------------------------------------------------------------------------------------------------------------------------------------------------------------------------------------------------|----------------|----------------------------------------------------------------------------------------------------------------------------------------------------------------------------------------------------------------------------------------------------------------------------------------------------------|------------|
|    | Observation period then inferred to be 24h given that they use a 24h window to define the overcorrection threshold                                                                                                                                                                                                                                                                                    | was $\geq 12$ mmol/L from baseline, thereby making the comparator sodium the maximum Na value within the observation period.<br><br>Furthermore, Table 3 reports maximal increases in serum sodium.                                                                                                                                                                                                                                                                                                                                     |                |                                                                                                                                                                                                                                                                                                          |            |
| F  | 2 days                                                                                                                                                                                                                                                                                                                                                                                                | Maximum Na value within observation period                                                                                                                                                                                                                                                                                                                                                                                                                                                                                              | N/A            | 18 mmol/L per 2 days                                                                                                                                                                                                                                                                                     | 30–34 (32) |
|    | <p>“The main outcomes were 1) proportion with safe [Na<sup>+</sup>] correction (defined as change in [Na<sup>+</sup>] <math>\leq 12</math> mEq/L in any 24-hour period and <math>\leq 18</math> mEq/L in any 48-hour period, in accordance with established guidelines”</p> <p>Observation period then inferred to be 48h given that they use a 48h window to define the overcorrection threshold</p> | <p>Methods – Paragraph 6</p> <p>“The main outcomes were 1) proportion with safe [Na<sup>+</sup>] correction (defined as change in [Na<sup>+</sup>] <math>\leq 12</math> mEq/L in any 24-hour period and <math>\leq 18</math> mEq/L in any 48-hour period, in accordance with established guidelines”</p> <p>Sentence interpreted as saying that the observation window of 48 hours was inspected for any sodium value that was <math>\geq 18</math> mmol/L from baseline, thereby making the comparator sodium the maximum Na value</p> |                | <p>Methods – Paragraph 6</p> <p>“The main outcomes were 1) proportion with safe [Na<sup>+</sup>] correction (defined as change in [Na<sup>+</sup>] <math>\leq 12</math> mEq/L in any 24-hour period and <math>\leq 18</math> mEq/L in any 48-hour period, in accordance with established guidelines”</p> |            |
| G3 | 1 day                                                                                                                                                                                                                                                                                                                                                                                                 | Estimated value at end of observation period                                                                                                                                                                                                                                                                                                                                                                                                                                                                                            | Footnote $\mu$ | 8 mmol/L per day                                                                                                                                                                                                                                                                                         | 14         |
|    | <p>Materials and Methods – Paragraph 2</p> <p>“For each study participant, we calculated the estimated serum sodium at 24 hours [Na (24)] using the following</p>                                                                                                                                                                                                                                     | <p>Materials and Methods – Paragraph 2</p> <p>“For each study participant, we calculated the estimated serum sodium at 24 hours [Na (24)] using the</p>                                                                                                                                                                                                                                                                                                                                                                                 |                | <p>Materials and Methods – Paragraph 3</p> <p>“The primary outcome was rapid correction at 24 hours, which was defined as the estimated</p>                                                                                                                                                              |            |

|    |                                                                                                                                                                                                                                                                                                                                                                                                                                                                                                                                                                                                                                                                                                                        |                                                                                                                                                                                                                                                                                                                                                                                                                                                                                                                                                                                                                                                                                                                                  |            |                                                                                                                                                                                                                                 |       |
|----|------------------------------------------------------------------------------------------------------------------------------------------------------------------------------------------------------------------------------------------------------------------------------------------------------------------------------------------------------------------------------------------------------------------------------------------------------------------------------------------------------------------------------------------------------------------------------------------------------------------------------------------------------------------------------------------------------------------------|----------------------------------------------------------------------------------------------------------------------------------------------------------------------------------------------------------------------------------------------------------------------------------------------------------------------------------------------------------------------------------------------------------------------------------------------------------------------------------------------------------------------------------------------------------------------------------------------------------------------------------------------------------------------------------------------------------------------------------|------------|---------------------------------------------------------------------------------------------------------------------------------------------------------------------------------------------------------------------------------|-------|
|    | <p>formula: <math>Na(24) = Na^a + [(Na^b - Na^a) \times (24 - T^a) / (T^b - T^a)]</math>, where <math>Na^a</math> and <math>T^a</math> are the closest serum sodium and time values before the 24-hour mark, respectively, and <math>Na^b</math> and <math>T^b</math> are the closest serum sodium and time values after the 24-hour mark, respectively (13). For patients with only one serum sodium value within 12 hours of the 24-hour mark, we used the following formula to estimate serum Na (24): <math>Na(24) = [(Na^a - Na^0) / T^a] \times 24 + Na^0</math> or <math>Na(24) = [(Na^b - Na^0) / T^b] \times 24 + Na^0</math> depending on whether <math>Na^a</math> or <math>Na^b</math> was available.”</p> | <p>following formula: <math>Na(24) = Na^a + [(Na^b - Na^a) \times (24 - T^a) / (T^b - T^a)]</math>, where <math>Na^a</math> and <math>T^a</math> are the closest serum sodium and time values before the 24-hour mark, respectively, and <math>Na^b</math> and <math>T^b</math> are the closest serum sodium and time values after the 24-hour mark, respectively (13). For patients with only one serum sodium value within 12 hours of the 24-hour mark, we used the following formula to estimate serum Na (24): <math>Na(24) = [(Na^a - Na^0) / T^a] \times 24 + Na^0</math> or <math>Na(24) = [(Na^b - Na^0) / T^b] \times 24 + Na^0</math> depending on whether <math>Na^a</math> or <math>Na^b</math> was available.”</p> |            | <p>rate of serum sodium correction &gt;8 mEq/L at 24 hours.”</p>                                                                                                                                                                |       |
| G4 | 1 day                                                                                                                                                                                                                                                                                                                                                                                                                                                                                                                                                                                                                                                                                                                  | Estimated value at end of observation period                                                                                                                                                                                                                                                                                                                                                                                                                                                                                                                                                                                                                                                                                     | Footnote μ | 10 mmol/L per day                                                                                                                                                                                                               | 14,35 |
|    | <p>Materials and Methods – Paragraph 2</p> <p>“For each study participant, we calculated the estimated serum sodium at 24 hours [Na (24)] using the following formula: <math>Na(24) = Na^a + [(Na^b - Na^a) \times (24 - T^a) / (T^b - T^a)]</math>, where <math>Na^a</math> and <math>T^a</math> are the closest serum sodium and time values before the 24-hour mark, respectively, and <math>Na^b</math> and <math>T^b</math> are the closest serum sodium and time values after the 24-hour mark, respectively (13). For patients with only one serum sodium value within 12 hours of the 24-hour mark, we used the following formula to estimate serum Na</p>                                                     | <p>Materials and Methods – Paragraph 2</p> <p>“For each study participant, we calculated the estimated serum sodium at 24 hours [Na (24)] using the following formula: <math>Na(24) = Na^a + [(Na^b - Na^a) \times (24 - T^a) / (T^b - T^a)]</math>, where <math>Na^a</math> and <math>T^a</math> are the closest serum sodium and time values before the 24-hour mark, respectively, and <math>Na^b</math> and <math>T^b</math> are the closest serum sodium and time values after the 24-hour mark, respectively (13). For patients with only one serum sodium value within 12 hours of the 24-hour</p>                                                                                                                        |            | <p>Materials and Methods – Paragraph 3</p> <p>“Secondary outcomes included alternative definitions of rapid correction: correction &gt;8 mEq/L at any point during the first 24 hours, correction &gt;10 mEq/L at 24 hours”</p> |       |

|   |                                                                                                                                                                                                                                                            |                                                                                                                                                                                                                                                                                                                                                                                                                                                                                                                                                                                                                                                                                                                                                                                                                                                                                                                                                                                                                                                                                  |            |                                                                                                                                                                                                                                                    |       |
|---|------------------------------------------------------------------------------------------------------------------------------------------------------------------------------------------------------------------------------------------------------------|----------------------------------------------------------------------------------------------------------------------------------------------------------------------------------------------------------------------------------------------------------------------------------------------------------------------------------------------------------------------------------------------------------------------------------------------------------------------------------------------------------------------------------------------------------------------------------------------------------------------------------------------------------------------------------------------------------------------------------------------------------------------------------------------------------------------------------------------------------------------------------------------------------------------------------------------------------------------------------------------------------------------------------------------------------------------------------|------------|----------------------------------------------------------------------------------------------------------------------------------------------------------------------------------------------------------------------------------------------------|-------|
|   | (24): Na (24)= [(Na <sup>a</sup> – Na <sup>0</sup> )/T <sup>a</sup> ] ×24+ Na <sup>0</sup> or Na (24)= [(Na <sup>b</sup> – Na <sup>0</sup> )/T <sup>b</sup> ] ×24+ Na <sup>0</sup> depending on whether Na <sup>a</sup> or Na <sup>b</sup> was available.” | mark, we used the following formula to estimate serum Na (24): Na (24)= [(Na <sup>a</sup> – Na <sup>0</sup> )/T <sup>a</sup> ] ×24+ Na <sup>0</sup> or Na (24)= [(Na <sup>b</sup> – Na <sup>0</sup> )/T <sup>b</sup> ] ×24+ Na <sup>0</sup> depending on whether Na <sup>a</sup> or Na <sup>b</sup> was available.”                                                                                                                                                                                                                                                                                                                                                                                                                                                                                                                                                                                                                                                                                                                                                              |            |                                                                                                                                                                                                                                                    |       |
| H | 2 days                                                                                                                                                                                                                                                     | Estimated value at end of observation period                                                                                                                                                                                                                                                                                                                                                                                                                                                                                                                                                                                                                                                                                                                                                                                                                                                                                                                                                                                                                                     | Footnote μ | 18 mmol/L per 2 days                                                                                                                                                                                                                               | 14,35 |
|   | Materials and Methods – Paragraph 3<br><br>“Secondary outcomes included alternative definitions of rapid correction: correction >8 mEq/L at any point during the first 24 hours, correction >10 mEq/L at 24 hours, or correction >18 mEq/L at 48h”         | Materials and Methods – Paragraph 2<br><br>“For each study participant, we calculated the estimated serum sodium at 24 hours [Na (24)] using the following formula: Na (24)= Na <sup>a</sup> + [(Na <sup>b</sup> – Na <sup>a</sup> ) ×(24– T <sup>a</sup> )/T <sup>b</sup> – T <sup>a</sup> ], where Na <sup>a</sup> and T <sup>a</sup> are the closest serum sodium and time values before the 24-hour mark, respectively, and Na <sup>b</sup> and T <sup>b</sup> are the closest serum sodium and time values after the 24-hour mark, respectively (13). For patients with only one serum sodium value within 12 hours of the 24-hour mark, we used the following formula to estimate serum Na (24): Na (24)= [(Na <sup>a</sup> – Na <sup>0</sup> )/T <sup>a</sup> ] ×24+ Na <sup>0</sup> or Na (24)= [(Na <sup>b</sup> – Na <sup>0</sup> )/T <sup>b</sup> ] ×24+ Na <sup>0</sup> depending on whether Na <sup>a</sup> or Na <sup>b</sup> was available.”<br><br>Based on this description of how they estimated the comparator sodium at 24h, we inferred that they would use |            | Materials and Methods – Paragraph 3<br><br>“Secondary outcomes included alternative definitions of rapid correction: correction >8 mEq/L at any point during the first 24 hours, correction >10 mEq/L at 24 hours, or correction >18 mEq/L at 48h” |       |

|    |                                                                                                                                                                                                                                                                                       |                                                                                                                                                                                                                                                                                                                                                                                                                                                                                                                                                                                                                                          |            |                                                                                                                                                             |       |
|----|---------------------------------------------------------------------------------------------------------------------------------------------------------------------------------------------------------------------------------------------------------------------------------------|------------------------------------------------------------------------------------------------------------------------------------------------------------------------------------------------------------------------------------------------------------------------------------------------------------------------------------------------------------------------------------------------------------------------------------------------------------------------------------------------------------------------------------------------------------------------------------------------------------------------------------------|------------|-------------------------------------------------------------------------------------------------------------------------------------------------------------|-------|
|    |                                                                                                                                                                                                                                                                                       | the same technique to estimate the value at 48h                                                                                                                                                                                                                                                                                                                                                                                                                                                                                                                                                                                          |            |                                                                                                                                                             |       |
| I5 | 1 day                                                                                                                                                                                                                                                                                 | End of observation period                                                                                                                                                                                                                                                                                                                                                                                                                                                                                                                                                                                                                | Footnote £ | 12 mmol/L per day                                                                                                                                           | 36,37 |
|    | <p>Discussion – Paragraph 5</p> <p>“Current recommendations call for sodium increases of no more than 12mmol/l in 24h or no more than 18mmol/l in 48h.”</p> <p>Observation period then inferred to be 24h given that they use a 24h window to define the overcorrection threshold</p> | <p>Study assessments – Paragraph 1</p> <p>“Prespecified secondary end points were change from baseline in serum sodium (average daily AUC) up to day 30”</p> <p>Based on this we inferred that they would use the same technique (AUC) to calculate changes in serum sodium to assess for overcorrection – it was not explicitly stated.</p> <p>Multiple comparator sodium values required for methods I5 and I6. Rates I5 and I6 calculated as the average daily area under the sodium vs. time curve for the specified observation period and therefore all sodium values subsequent to the initial value are used as comparators.</p> |            | <p>Discussion – Paragraph 5</p> <p>“Current recommendations call for sodium increases of no more than 12mmol/l in 24h or no more than 18mmol/l in 48h.”</p> |       |
| I6 | 2 days                                                                                                                                                                                                                                                                                | End of observation period                                                                                                                                                                                                                                                                                                                                                                                                                                                                                                                                                                                                                | Footnote £ | 18 mmol/L per day                                                                                                                                           | 37    |
|    | <p>Discussion – Paragraph 5</p> <p>“Current recommendations call for sodium increases of no more than 12mmol/l in 24h or no more than 18mmol/l in 48h.”</p>                                                                                                                           | <p>Study assessments – Paragraph 1</p> <p>“Prespecified secondary end points were change from baseline in serum sodium (average daily AUC) up to day 30”</p>                                                                                                                                                                                                                                                                                                                                                                                                                                                                             |            | <p>Discussion – Paragraph 5</p> <p>“Current recommendations call for sodium increases of no more than 12mmol/l in 24h or no more than 18mmol/l in 48h.”</p> |       |

|                                                                                                                    |                                                                                                                                                                                                                                                                                                                                                                                                                                                                      |  |  |  |
|--------------------------------------------------------------------------------------------------------------------|----------------------------------------------------------------------------------------------------------------------------------------------------------------------------------------------------------------------------------------------------------------------------------------------------------------------------------------------------------------------------------------------------------------------------------------------------------------------|--|--|--|
| Observation period then inferred to be 48h given that they use a 48h window to define the overcorrection threshold | Based on this we inferred that they would use the same technique (AUC) to calculate changes in serum sodium to assess for overcorrection – it was not explicitly stated.<br><br>Multiple comparator sodium values required for methods I5 and I6. Rates I5 and I6 calculated as the average daily area under the sodium vs. time curve for the specified observation period and therefore all sodium values subsequent to the initial value are used as comparators. |  |  |  |
|--------------------------------------------------------------------------------------------------------------------|----------------------------------------------------------------------------------------------------------------------------------------------------------------------------------------------------------------------------------------------------------------------------------------------------------------------------------------------------------------------------------------------------------------------------------------------------------------------|--|--|--|

€ - Comparator sodium represents the value drawn *closest to end of observation period*. Daily rate was then generated by calculating average hourly rate of correction, and then converting to daily rate of correction.

μ - Comparator sodium represents the time-weighted estimate of the serum sodium measurement at the end of observation period. Comparator sodium was imputed using linear interpolation between sodium values *prior to* and *following* the end of the observation period (George et al. CJASN 2018). Similar methods were used if sodium was measured only once within 12 hours of end of observation period, in which case linear interpolation was calculated using the baseline sodium. No rate can be calculated using this method for patients without sodium measures within 12 hours of the end of observation period.

£ - Multiple comparator sodium values required for methods I5 and I6. Rates I5 and I6 calculated as the average daily area under the sodium vs. time curve for the specified observation period and therefore all sodium values subsequent to the initial value are used as comparators.

NOTE: Rates are undefined for D2, E3, E4, E5, and F6 if patients did not have a sodium measured between the initial measure and the end of observation period.

**SUPPLEMENTARY TABLE 3:** Summary of latent class analysis model fit with varying number of model classes

| Number of Classes | Mean Fit Statistic of 1000 Bootstrap Samples |                                    |                                      |                |
|-------------------|----------------------------------------------|------------------------------------|--------------------------------------|----------------|
|                   | G <sup>2</sup>                               | Akaike Information Criterion (AIC) | Bayesian Information Criterion (BIC) | Log Likelihood |
| 1                 | 2463.7                                       | 2530.6                             | 2493                                 | -2701.1        |
| 2                 | 687                                          | 828.2                              | 748.9                                | -1812.8        |
| 3                 | 221.1                                        | 436.7                              | 315.7                                | -1579.9        |
| 4                 | 144.3                                        | 434.2                              | 271.4                                | -1541.4        |
| 5                 | 72.3                                         | 436.6                              | 232                                  | -1505.4        |

Models having increasing number of classes (column 1) were created in 1000 bootstrap samples of the original cohort having random combinations of overcorrection criteria having the same hyponatremic correction rate formula but different thresholds defining overcorrection (i.e. criteria B, E, G, and I in Supplementary Table B). Each model's fit was determined using the AIC and the BIC. The best-fitting model was that having lowest values of the AIC or the BIC. The 4-class model was chosen.

**Supplementary Table 4:** Prevalence of indicator criteria within each overcorrection group

| Criterion     | Prevalence by Overcorrection Class |                     |                     |                     |
|---------------|------------------------------------|---------------------|---------------------|---------------------|
|               | No                                 | Unlikely            | Possible            | Definite            |
| A             | 80.4% (76, 84.9)                   | 99.6% (98.8, 100.3) | 99.9% (99.3, 100.6) | 100% (99.6, 100.3)  |
| B3 or B5      | 2.4% (0.9, 4)                      | 54.4% (47.4, 61.4)  | 77.3% (66.6, 87.9)  | 98.1% (95.2, 101)   |
| C             | 0.8% (0, 1.9)                      | 4.8% (1.3, 8.3)     | 33% (23.9, 42.1)    | 97.8% (93.6, 102)   |
| D             | 0.4% (0, 1.1)                      | 9% (4.1, 13.9)      | 10.2% (2.4, 17.9)   | 30.2% (19.4, 41)    |
| E3 or E5      | 1.7% (0, 3.5)                      | 46.2% (38, 54.4)    | 66.3% (53.4, 79.2)  | 94.4% (88.7, 100)   |
| F             | 1.1% (0, 2.3)                      | 8% (3.3, 12.6)      | 24.4% (10.3, 38.4)  | 95.7% (90.9, 100.4) |
| G3, G4, or G5 | 3.7% (0.7, 6.7)                    | 81.2% (73.7, 88.8)  | 90.1% (82.9, 97.4)  | 99.8% (98.9, 100.8) |
| H             | 0.6% (0, 1.5)                      | 10.9% (5, 16.9)     | 56.2% (50.5, 61.9)  | 99% (96.9, 101.2)   |
| I5 or I6      | 0% (0, 0.2)                        | 0.5% (0, 1.8)       | 89.7% (83.6, 95.7)  | 96.9% (93.5, 100.3) |

These were the mean values of 1000 bootstrap samples.

**Supplementary Table 5:** Criteria response patterns and their overcorrection classification status in bootstrap analysis.

This table permits the overcorrection status probability to be determined as a function of the status of each criterion. For example, a person who was classified with NO overcorrection by criteria A, B3, C, F, G3, H, and I5 would have a 100% probability of having an “Overall Overcorrection Status” of “No”. See Supplementary Table B for definitions of criteria A through I.

| Overcorrection Present by Individual Criterion (with Sub-Type)?<br>[0 = no; 1 = yes; . = incalculable] |   |           |   |   |   |           |   |   |           |   |   |           | Overcorrection Status - N (%) |          |          |          |       |
|--------------------------------------------------------------------------------------------------------|---|-----------|---|---|---|-----------|---|---|-----------|---|---|-----------|-------------------------------|----------|----------|----------|-------|
| A                                                                                                      | B | B<br>TYPE | C | D | E | E<br>TYPE | F | G | G<br>TYPE | H | I | I<br>TYPE | No                            | Unlikely | Possible | Definite | Total |
| 0                                                                                                      | 0 | _B3       | 0 | . | . | _E3       | 0 | 0 | _G3       | 0 | 0 | _I5       | 41<br>(100%)                  | 0 (0%)   | 0 (0%)   | 0 (0%)   | 41    |
| 0                                                                                                      | 0 | _B3       | 0 | . | . | _E3       | 0 | 0 | _G3       | 0 | 0 | _I6       | 39<br>(100%)                  | 0 (0%)   | 0 (0%)   | 0 (0%)   | 39    |
| 0                                                                                                      | 0 | _B3       | 0 | . | . | _E3       | 0 | 0 | _G4       | 0 | 0 | _I5       | 44<br>(100%)                  | 0 (0%)   | 0 (0%)   | 0 (0%)   | 44    |
| 0                                                                                                      | 0 | _B3       | 0 | . | . | _E3       | 0 | 0 | _G4       | 0 | 0 | _I6       | 42<br>(100%)                  | 0 (0%)   | 0 (0%)   | 0 (0%)   | 42    |
| 0                                                                                                      | 0 | _B3       | 0 | . | . | _E4       | 0 | 0 | _G3       | 0 | 0 | _I5       | 45<br>(100%)                  | 0 (0%)   | 0 (0%)   | 0 (0%)   | 45    |
| 0                                                                                                      | 0 | _B3       | 0 | . | . | _E4       | 0 | 0 | _G3       | 0 | 0 | _I6       | 34<br>(100%)                  | 0 (0%)   | 0 (0%)   | 0 (0%)   | 34    |
| 0                                                                                                      | 0 | _B3       | 0 | . | . | _E4       | 0 | 0 | _G4       | 0 | 0 | _I5       | 40<br>(100%)                  | 0 (0%)   | 0 (0%)   | 0 (0%)   | 40    |
| 0                                                                                                      | 0 | _B3       | 0 | . | . | _E4       | 0 | 0 | _G4       | 0 | 0 | _I6       | 46<br>(100%)                  | 0 (0%)   | 0 (0%)   | 0 (0%)   | 46    |
| 0                                                                                                      | 0 | _B3       | 0 | . | . | _E5       | 0 | 0 | _G3       | 0 | 0 | _I5       | 41<br>(100%)                  | 0 (0%)   | 0 (0%)   | 0 (0%)   | 41    |
| 0                                                                                                      | 0 | _B3       | 0 | . | . | _E5       | 0 | 0 | _G3       | 0 | 0 | _I6       | 41<br>(100%)                  | 0 (0%)   | 0 (0%)   | 0 (0%)   | 41    |
| 0                                                                                                      | 0 | _B3       | 0 | . | . | _E5       | 0 | 0 | _G4       | 0 | 0 | _I5       | 47<br>(100%)                  | 0 (0%)   | 0 (0%)   | 0 (0%)   | 47    |
| 0                                                                                                      | 0 | _B3       | 0 | . | . | _E5       | 0 | 0 | _G4       | 0 | 0 | _I6       | 40<br>(100%)                  | 0 (0%)   | 0 (0%)   | 0 (0%)   | 40    |
| 0                                                                                                      | 0 | _B3       | 0 | . | 0 | _E3       | 0 | . | _G3       | 0 | 0 | _I5       | 41<br>(100%)                  | 0 (0%)   | 0 (0%)   | 0 (0%)   | 41    |
| 0                                                                                                      | 0 | _B3       | 0 | . | 0 | _E3       | 0 | . | _G3       | 0 | 0 | _I6       | 39<br>(100%)                  | 0 (0%)   | 0 (0%)   | 0 (0%)   | 39    |
| 0                                                                                                      | 0 | _B3       | 0 | . | 0 | _E3       | 0 | . | _G4       | 0 | 0 | _I5       | 44<br>(100%)                  | 0 (0%)   | 0 (0%)   | 0 (0%)   | 44    |

*Supplemental material is neither peer-reviewed nor thoroughly edited by CJASN. The authors alone are responsible for the accuracy and presentation of the material.*

|   |   |     |   |   |   |     |   |   |     |   |   |     |               |        |        |        |     |
|---|---|-----|---|---|---|-----|---|---|-----|---|---|-----|---------------|--------|--------|--------|-----|
| 0 | 0 | _B3 | 0 | . | 0 | _E3 | 0 | . | _G4 | 0 | 0 | _I6 | 42<br>(100%)  | 0 (0%) | 0 (0%) | 0 (0%) | 42  |
| 0 | 0 | _B3 | 0 | . | 0 | _E3 | 0 | 0 | _G3 | . | 0 | _I5 | 164<br>(100%) | 0 (0%) | 0 (0%) | 0 (0%) | 164 |
| 0 | 0 | _B3 | 0 | . | 0 | _E3 | 0 | 0 | _G3 | . | 0 | _I6 | 156<br>(100%) | 0 (0%) | 0 (0%) | 0 (0%) | 156 |
| 0 | 0 | _B3 | 0 | . | 0 | _E3 | 0 | 0 | _G3 | 0 | 0 | _I5 | 738<br>(100%) | 0 (0%) | 0 (0%) | 0 (0%) | 738 |
| 0 | 0 | _B3 | 0 | . | 0 | _E3 | 0 | 0 | _G3 | 0 | 0 | _I6 | 702<br>(100%) | 0 (0%) | 0 (0%) | 0 (0%) | 702 |
| 0 | 0 | _B3 | 0 | . | 0 | _E3 | 0 | 0 | _G4 | . | 0 | _I5 | 176<br>(100%) | 0 (0%) | 0 (0%) | 0 (0%) | 176 |
| 0 | 0 | _B3 | 0 | . | 0 | _E3 | 0 | 0 | _G4 | . | 0 | _I6 | 168<br>(100%) | 0 (0%) | 0 (0%) | 0 (0%) | 168 |
| 0 | 0 | _B3 | 0 | . | 0 | _E3 | 0 | 0 | _G4 | 0 | 0 | _I5 | 792<br>(100%) | 0 (0%) | 0 (0%) | 0 (0%) | 792 |
| 0 | 0 | _B3 | 0 | . | 0 | _E3 | 0 | 0 | _G4 | 0 | 0 | _I6 | 756<br>(100%) | 0 (0%) | 0 (0%) | 0 (0%) | 756 |
| 0 | 0 | _B3 | 0 | . | 0 | _E4 | 0 | . | _G3 | 0 | 0 | _I5 | 45<br>(100%)  | 0 (0%) | 0 (0%) | 0 (0%) | 45  |
| 0 | 0 | _B3 | 0 | . | 0 | _E4 | 0 | . | _G3 | 0 | 0 | _I6 | 34<br>(100%)  | 0 (0%) | 0 (0%) | 0 (0%) | 34  |
| 0 | 0 | _B3 | 0 | . | 0 | _E4 | 0 | . | _G4 | 0 | 0 | _I5 | 40<br>(100%)  | 0 (0%) | 0 (0%) | 0 (0%) | 40  |
| 0 | 0 | _B3 | 0 | . | 0 | _E4 | 0 | . | _G4 | 0 | 0 | _I6 | 46<br>(100%)  | 0 (0%) | 0 (0%) | 0 (0%) | 46  |
| 0 | 0 | _B3 | 0 | . | 0 | _E4 | 0 | 0 | _G3 | . | 0 | _I5 | 180<br>(100%) | 0 (0%) | 0 (0%) | 0 (0%) | 180 |
| 0 | 0 | _B3 | 0 | . | 0 | _E4 | 0 | 0 | _G3 | . | 0 | _I6 | 136<br>(100%) | 0 (0%) | 0 (0%) | 0 (0%) | 136 |
| 0 | 0 | _B3 | 0 | . | 0 | _E4 | 0 | 0 | _G3 | 0 | 0 | _I5 | 810<br>(100%) | 0 (0%) | 0 (0%) | 0 (0%) | 810 |
| 0 | 0 | _B3 | 0 | . | 0 | _E4 | 0 | 0 | _G3 | 0 | 0 | _I6 | 612<br>(100%) | 0 (0%) | 0 (0%) | 0 (0%) | 612 |
| 0 | 0 | _B3 | 0 | . | 0 | _E4 | 0 | 0 | _G4 | . | 0 | _I5 | 160<br>(100%) | 0 (0%) | 0 (0%) | 0 (0%) | 160 |
| 0 | 0 | _B3 | 0 | . | 0 | _E4 | 0 | 0 | _G4 | . | 0 | _I6 | 184<br>(100%) | 0 (0%) | 0 (0%) | 0 (0%) | 184 |
| 0 | 0 | _B3 | 0 | . | 0 | _E4 | 0 | 0 | _G4 | 0 | 0 | _I5 | 720<br>(100%) | 0 (0%) | 0 (0%) | 0 (0%) | 720 |
| 0 | 0 | _B3 | 0 | . | 0 | _E4 | 0 | 0 | _G4 | 0 | 0 | _I6 | 828<br>(100%) | 0 (0%) | 0 (0%) | 0 (0%) | 828 |

Supplemental material is neither peer-reviewed nor thoroughly edited by CJASN. The authors alone are responsible for the accuracy and presentation of the material.

|   |   |     |   |   |   |     |   |   |     |   |   |     |                |        |        |        |      |
|---|---|-----|---|---|---|-----|---|---|-----|---|---|-----|----------------|--------|--------|--------|------|
| 0 | 0 | _B3 | 0 | . | 0 | _E5 | 0 | . | _G3 | 0 | 0 | _I5 | 41<br>(100%)   | 0 (0%) | 0 (0%) | 0 (0%) | 41   |
| 0 | 0 | _B3 | 0 | . | 0 | _E5 | 0 | . | _G3 | 0 | 0 | _I6 | 41<br>(100%)   | 0 (0%) | 0 (0%) | 0 (0%) | 41   |
| 0 | 0 | _B3 | 0 | . | 0 | _E5 | 0 | . | _G4 | 0 | 0 | _I5 | 47<br>(100%)   | 0 (0%) | 0 (0%) | 0 (0%) | 47   |
| 0 | 0 | _B3 | 0 | . | 0 | _E5 | 0 | . | _G4 | 0 | 0 | _I6 | 40<br>(100%)   | 0 (0%) | 0 (0%) | 0 (0%) | 40   |
| 0 | 0 | _B3 | 0 | . | 0 | _E5 | 0 | 0 | _G3 | . | 0 | _I5 | 164<br>(100%)  | 0 (0%) | 0 (0%) | 0 (0%) | 164  |
| 0 | 0 | _B3 | 0 | . | 0 | _E5 | 0 | 0 | _G3 | . | 0 | _I6 | 164<br>(100%)  | 0 (0%) | 0 (0%) | 0 (0%) | 164  |
| 0 | 0 | _B3 | 0 | . | 0 | _E5 | 0 | 0 | _G3 | 0 | 0 | _I5 | 738<br>(100%)  | 0 (0%) | 0 (0%) | 0 (0%) | 738  |
| 0 | 0 | _B3 | 0 | . | 0 | _E5 | 0 | 0 | _G3 | 0 | 0 | _I6 | 738<br>(100%)  | 0 (0%) | 0 (0%) | 0 (0%) | 738  |
| 0 | 0 | _B3 | 0 | . | 0 | _E5 | 0 | 0 | _G4 | . | 0 | _I5 | 188<br>(100%)  | 0 (0%) | 0 (0%) | 0 (0%) | 188  |
| 0 | 0 | _B3 | 0 | . | 0 | _E5 | 0 | 0 | _G4 | . | 0 | _I6 | 160<br>(100%)  | 0 (0%) | 0 (0%) | 0 (0%) | 160  |
| 0 | 0 | _B3 | 0 | . | 0 | _E5 | 0 | 0 | _G4 | 0 | 0 | _I5 | 846<br>(100%)  | 0 (0%) | 0 (0%) | 0 (0%) | 846  |
| 0 | 0 | _B3 | 0 | . | 0 | _E5 | 0 | 0 | _G4 | 0 | 0 | _I6 | 720<br>(100%)  | 0 (0%) | 0 (0%) | 0 (0%) | 720  |
| 0 | 0 | _B3 | 0 | 0 | 0 | _E3 | 0 | . | _G3 | . | 0 | _I5 | 82<br>(100%)   | 0 (0%) | 0 (0%) | 0 (0%) | 82   |
| 0 | 0 | _B3 | 0 | 0 | 0 | _E3 | 0 | . | _G3 | . | 0 | _I6 | 78<br>(100%)   | 0 (0%) | 0 (0%) | 0 (0%) | 78   |
| 0 | 0 | _B3 | 0 | 0 | 0 | _E3 | 0 | . | _G4 | . | 0 | _I5 | 88<br>(100%)   | 0 (0%) | 0 (0%) | 0 (0%) | 88   |
| 0 | 0 | _B3 | 0 | 0 | 0 | _E3 | 0 | . | _G4 | . | 0 | _I6 | 84<br>(100%)   | 0 (0%) | 0 (0%) | 0 (0%) | 84   |
| 0 | 0 | _B3 | 0 | 0 | 0 | _E3 | 0 | 0 | _G3 | . | 0 | _I5 | 82<br>(100%)   | 0 (0%) | 0 (0%) | 0 (0%) | 82   |
| 0 | 0 | _B3 | 0 | 0 | 0 | _E3 | 0 | 0 | _G3 | . | 0 | _I6 | 78<br>(100%)   | 0 (0%) | 0 (0%) | 0 (0%) | 78   |
| 0 | 0 | _B3 | 0 | 0 | 0 | _E3 | 0 | 0 | _G3 | 0 | 0 | _I5 | 1271<br>(100%) | 0 (0%) | 0 (0%) | 0 (0%) | 1271 |
| 0 | 0 | _B3 | 0 | 0 | 0 | _E3 | 0 | 0 | _G3 | 0 | 0 | _I6 | 1209<br>(100%) | 0 (0%) | 0 (0%) | 0 (0%) | 1209 |
| 0 | 0 | _B3 | 0 | 0 | 0 | _E3 | 0 | 0 | _G4 | . | 0 | _I5 | 88<br>(100%)   | 0 (0%) | 0 (0%) | 0 (0%) | 88   |

Supplemental material is neither peer-reviewed nor thoroughly edited by CJASN. The authors alone are responsible for the accuracy and presentation of the material.

|   |   |     |   |   |   |     |   |   |     |   |   |     |                |           |        |        |      |
|---|---|-----|---|---|---|-----|---|---|-----|---|---|-----|----------------|-----------|--------|--------|------|
| 0 | 0 | _B3 | 0 | 0 | 0 | _E3 | 0 | 0 | _G4 | . | 0 | _I6 | 84<br>(100%)   | 0 (0%)    | 0 (0%) | 0 (0%) | 84   |
| 0 | 0 | _B3 | 0 | 0 | 0 | _E3 | 0 | 0 | _G4 | 0 | 0 | _I5 | 1408<br>(100%) | 0 (0%)    | 0 (0%) | 0 (0%) | 1408 |
| 0 | 0 | _B3 | 0 | 0 | 0 | _E3 | 0 | 0 | _G4 | 0 | 0 | _I6 | 1344<br>(100%) | 0 (0%)    | 0 (0%) | 0 (0%) | 1344 |
| 0 | 0 | _B3 | 0 | 0 | 0 | _E3 | 0 | 1 | _G3 | 0 | 0 | _I5 | 0 (0%)         | 41 (100%) | 0 (0%) | 0 (0%) | 41   |
| 0 | 0 | _B3 | 0 | 0 | 0 | _E3 | 0 | 1 | _G3 | 0 | 0 | _I6 | 39<br>(100%)   | 0 (0%)    | 0 (0%) | 0 (0%) | 39   |
| 0 | 0 | _B3 | 0 | 0 | 0 | _E4 | 0 | . | _G3 | . | 0 | _I5 | 90<br>(100%)   | 0 (0%)    | 0 (0%) | 0 (0%) | 90   |
| 0 | 0 | _B3 | 0 | 0 | 0 | _E4 | 0 | . | _G3 | . | 0 | _I6 | 68<br>(100%)   | 0 (0%)    | 0 (0%) | 0 (0%) | 68   |
| 0 | 0 | _B3 | 0 | 0 | 0 | _E4 | 0 | . | _G4 | . | 0 | _I5 | 80<br>(100%)   | 0 (0%)    | 0 (0%) | 0 (0%) | 80   |
| 0 | 0 | _B3 | 0 | 0 | 0 | _E4 | 0 | . | _G4 | . | 0 | _I6 | 92<br>(100%)   | 0 (0%)    | 0 (0%) | 0 (0%) | 92   |
| 0 | 0 | _B3 | 0 | 0 | 0 | _E4 | 0 | 0 | _G3 | . | 0 | _I5 | 90<br>(100%)   | 0 (0%)    | 0 (0%) | 0 (0%) | 90   |
| 0 | 0 | _B3 | 0 | 0 | 0 | _E4 | 0 | 0 | _G3 | . | 0 | _I6 | 68<br>(100%)   | 0 (0%)    | 0 (0%) | 0 (0%) | 68   |
| 0 | 0 | _B3 | 0 | 0 | 0 | _E4 | 0 | 0 | _G3 | 0 | 0 | _I5 | 1395<br>(100%) | 0 (0%)    | 0 (0%) | 0 (0%) | 1395 |
| 0 | 0 | _B3 | 0 | 0 | 0 | _E4 | 0 | 0 | _G3 | 0 | 0 | _I6 | 1054<br>(100%) | 0 (0%)    | 0 (0%) | 0 (0%) | 1054 |
| 0 | 0 | _B3 | 0 | 0 | 0 | _E4 | 0 | 0 | _G4 | . | 0 | _I5 | 80<br>(100%)   | 0 (0%)    | 0 (0%) | 0 (0%) | 80   |
| 0 | 0 | _B3 | 0 | 0 | 0 | _E4 | 0 | 0 | _G4 | . | 0 | _I6 | 92<br>(100%)   | 0 (0%)    | 0 (0%) | 0 (0%) | 92   |
| 0 | 0 | _B3 | 0 | 0 | 0 | _E4 | 0 | 0 | _G4 | 0 | 0 | _I5 | 1280<br>(100%) | 0 (0%)    | 0 (0%) | 0 (0%) | 1280 |
| 0 | 0 | _B3 | 0 | 0 | 0 | _E4 | 0 | 0 | _G4 | 0 | 0 | _I6 | 1472<br>(100%) | 0 (0%)    | 0 (0%) | 0 (0%) | 1472 |
| 0 | 0 | _B3 | 0 | 0 | 0 | _E4 | 0 | 1 | _G3 | 0 | 0 | _I5 | 45<br>(100%)   | 0 (0%)    | 0 (0%) | 0 (0%) | 45   |
| 0 | 0 | _B3 | 0 | 0 | 0 | _E4 | 0 | 1 | _G3 | 0 | 0 | _I6 | 34<br>(100%)   | 0 (0%)    | 0 (0%) | 0 (0%) | 34   |
| 0 | 0 | _B3 | 0 | 0 | 0 | _E5 | 0 | . | _G3 | . | 0 | _I5 | 82<br>(100%)   | 0 (0%)    | 0 (0%) | 0 (0%) | 82   |
| 0 | 0 | _B3 | 0 | 0 | 0 | _E5 | 0 | . | _G3 | . | 0 | _I6 | 82<br>(100%)   | 0 (0%)    | 0 (0%) | 0 (0%) | 82   |

Supplemental material is neither peer-reviewed nor thoroughly edited by CJASN. The authors alone are responsible for the accuracy and presentation of the material.

|   |   |     |   |   |   |     |   |   |     |   |   |     |                |        |        |        |      |
|---|---|-----|---|---|---|-----|---|---|-----|---|---|-----|----------------|--------|--------|--------|------|
| 0 | 0 | _B3 | 0 | 0 | 0 | _E5 | 0 | . | _G4 | . | 0 | _I5 | 94<br>(100%)   | 0 (0%) | 0 (0%) | 0 (0%) | 94   |
| 0 | 0 | _B3 | 0 | 0 | 0 | _E5 | 0 | . | _G4 | . | 0 | _I6 | 80<br>(100%)   | 0 (0%) | 0 (0%) | 0 (0%) | 80   |
| 0 | 0 | _B3 | 0 | 0 | 0 | _E5 | 0 | 0 | _G3 | . | 0 | _I5 | 82<br>(100%)   | 0 (0%) | 0 (0%) | 0 (0%) | 82   |
| 0 | 0 | _B3 | 0 | 0 | 0 | _E5 | 0 | 0 | _G3 | . | 0 | _I6 | 82<br>(100%)   | 0 (0%) | 0 (0%) | 0 (0%) | 82   |
| 0 | 0 | _B3 | 0 | 0 | 0 | _E5 | 0 | 0 | _G3 | 0 | 0 | _I5 | 1271<br>(100%) | 0 (0%) | 0 (0%) | 0 (0%) | 1271 |
| 0 | 0 | _B3 | 0 | 0 | 0 | _E5 | 0 | 0 | _G3 | 0 | 0 | _I6 | 1272<br>(100%) | 0 (0%) | 0 (0%) | 0 (0%) | 1272 |
| 0 | 0 | _B3 | 0 | 0 | 0 | _E5 | 0 | 0 | _G4 | . | 0 | _I5 | 94<br>(100%)   | 0 (0%) | 0 (0%) | 0 (0%) | 94   |
| 0 | 0 | _B3 | 0 | 0 | 0 | _E5 | 0 | 0 | _G4 | . | 0 | _I6 | 80<br>(100%)   | 0 (0%) | 0 (0%) | 0 (0%) | 80   |
| 0 | 0 | _B3 | 0 | 0 | 0 | _E5 | 0 | 0 | _G4 | 0 | 0 | _I5 | 1504<br>(100%) | 0 (0%) | 0 (0%) | 0 (0%) | 1504 |
| 0 | 0 | _B3 | 0 | 0 | 0 | _E5 | 0 | 0 | _G4 | 0 | 0 | _I6 | 1280<br>(100%) | 0 (0%) | 0 (0%) | 0 (0%) | 1280 |
| 0 | 0 | _B3 | 0 | 0 | 0 | _E5 | 0 | 1 | _G3 | 0 | 0 | _I5 | 41<br>(100%)   | 0 (0%) | 0 (0%) | 0 (0%) | 41   |
| 0 | 0 | _B3 | 0 | 0 | 0 | _E5 | 0 | 1 | _G3 | 0 | 0 | _I6 | 40<br>(100%)   | 0 (0%) | 0 (0%) | 0 (0%) | 40   |
| 0 | 0 | _B5 | 0 | . | . | _E3 | 0 | 0 | _G3 | 0 | 0 | _I5 | 37<br>(100%)   | 0 (0%) | 0 (0%) | 0 (0%) | 37   |
| 0 | 0 | _B5 | 0 | . | . | _E3 | 0 | 0 | _G3 | 0 | 0 | _I6 | 42<br>(100%)   | 0 (0%) | 0 (0%) | 0 (0%) | 42   |
| 0 | 0 | _B5 | 0 | . | . | _E3 | 0 | 0 | _G4 | 0 | 0 | _I5 | 42<br>(100%)   | 0 (0%) | 0 (0%) | 0 (0%) | 42   |
| 0 | 0 | _B5 | 0 | . | . | _E3 | 0 | 0 | _G4 | 0 | 0 | _I6 | 42<br>(100%)   | 0 (0%) | 0 (0%) | 0 (0%) | 42   |
| 0 | 0 | _B5 | 0 | . | . | _E4 | 0 | 0 | _G3 | 0 | 0 | _I5 | 45<br>(100%)   | 0 (0%) | 0 (0%) | 0 (0%) | 45   |
| 0 | 0 | _B5 | 0 | . | . | _E4 | 0 | 0 | _G3 | 0 | 0 | _I6 | 38<br>(100%)   | 0 (0%) | 0 (0%) | 0 (0%) | 38   |
| 0 | 0 | _B5 | 0 | . | . | _E4 | 0 | 0 | _G4 | 0 | 0 | _I5 | 36<br>(100%)   | 0 (0%) | 0 (0%) | 0 (0%) | 36   |
| 0 | 0 | _B5 | 0 | . | . | _E4 | 0 | 0 | _G4 | 0 | 0 | _I6 | 47<br>(100%)   | 0 (0%) | 0 (0%) | 0 (0%) | 47   |
| 0 | 0 | _B5 | 0 | . | . | _E5 | 0 | 0 | _G3 | 0 | 0 | _I5 | 34<br>(100%)   | 0 (0%) | 0 (0%) | 0 (0%) | 34   |

Supplemental material is neither peer-reviewed nor thoroughly edited by CJASN. The authors alone are responsible for the accuracy and presentation of the material.

|   |   |     |   |   |   |     |   |   |     |   |   |     |               |        |        |        |     |
|---|---|-----|---|---|---|-----|---|---|-----|---|---|-----|---------------|--------|--------|--------|-----|
| 0 | 0 | _B5 | 0 | . | . | _E5 | 0 | 0 | _G3 | 0 | 0 | _I6 | 49<br>(100%)  | 0 (0%) | 0 (0%) | 0 (0%) | 49  |
| 0 | 0 | _B5 | 0 | . | . | _E5 | 0 | 0 | _G4 | 0 | 0 | _I5 | 49<br>(100%)  | 0 (0%) | 0 (0%) | 0 (0%) | 49  |
| 0 | 0 | _B5 | 0 | . | . | _E5 | 0 | 0 | _G4 | 0 | 0 | _I6 | 39<br>(100%)  | 0 (0%) | 0 (0%) | 0 (0%) | 39  |
| 0 | 0 | _B5 | 0 | . | 0 | _E3 | 0 | . | _G3 | 0 | 0 | _I5 | 37<br>(100%)  | 0 (0%) | 0 (0%) | 0 (0%) | 37  |
| 0 | 0 | _B5 | 0 | . | 0 | _E3 | 0 | . | _G3 | 0 | 0 | _I6 | 42<br>(100%)  | 0 (0%) | 0 (0%) | 0 (0%) | 42  |
| 0 | 0 | _B5 | 0 | . | 0 | _E3 | 0 | . | _G4 | 0 | 0 | _I5 | 42<br>(100%)  | 0 (0%) | 0 (0%) | 0 (0%) | 42  |
| 0 | 0 | _B5 | 0 | . | 0 | _E3 | 0 | . | _G4 | 0 | 0 | _I6 | 42<br>(100%)  | 0 (0%) | 0 (0%) | 0 (0%) | 42  |
| 0 | 0 | _B5 | 0 | . | 0 | _E3 | 0 | 0 | _G3 | . | 0 | _I5 | 148<br>(100%) | 0 (0%) | 0 (0%) | 0 (0%) | 148 |
| 0 | 0 | _B5 | 0 | . | 0 | _E3 | 0 | 0 | _G3 | . | 0 | _I6 | 168<br>(100%) | 0 (0%) | 0 (0%) | 0 (0%) | 168 |
| 0 | 0 | _B5 | 0 | . | 0 | _E3 | 0 | 0 | _G3 | 0 | 0 | _I5 | 666<br>(100%) | 0 (0%) | 0 (0%) | 0 (0%) | 666 |
| 0 | 0 | _B5 | 0 | . | 0 | _E3 | 0 | 0 | _G3 | 0 | 0 | _I6 | 756<br>(100%) | 0 (0%) | 0 (0%) | 0 (0%) | 756 |
| 0 | 0 | _B5 | 0 | . | 0 | _E3 | 0 | 0 | _G4 | . | 0 | _I5 | 168<br>(100%) | 0 (0%) | 0 (0%) | 0 (0%) | 168 |
| 0 | 0 | _B5 | 0 | . | 0 | _E3 | 0 | 0 | _G4 | . | 0 | _I6 | 168<br>(100%) | 0 (0%) | 0 (0%) | 0 (0%) | 168 |
| 0 | 0 | _B5 | 0 | . | 0 | _E3 | 0 | 0 | _G4 | 0 | 0 | _I5 | 798<br>(100%) | 0 (0%) | 0 (0%) | 0 (0%) | 798 |
| 0 | 0 | _B5 | 0 | . | 0 | _E3 | 0 | 0 | _G4 | 0 | 0 | _I6 | 798<br>(100%) | 0 (0%) | 0 (0%) | 0 (0%) | 798 |
| 0 | 0 | _B5 | 0 | . | 0 | _E3 | 0 | 1 | _G3 | 0 | 0 | _I5 | 37<br>(100%)  | 0 (0%) | 0 (0%) | 0 (0%) | 37  |
| 0 | 0 | _B5 | 0 | . | 0 | _E3 | 0 | 1 | _G3 | 0 | 0 | _I6 | 42<br>(100%)  | 0 (0%) | 0 (0%) | 0 (0%) | 42  |
| 0 | 0 | _B5 | 0 | . | 0 | _E4 | 0 | . | _G3 | 0 | 0 | _I5 | 45<br>(100%)  | 0 (0%) | 0 (0%) | 0 (0%) | 45  |
| 0 | 0 | _B5 | 0 | . | 0 | _E4 | 0 | . | _G3 | 0 | 0 | _I6 | 38<br>(100%)  | 0 (0%) | 0 (0%) | 0 (0%) | 38  |
| 0 | 0 | _B5 | 0 | . | 0 | _E4 | 0 | . | _G4 | 0 | 0 | _I5 | 36<br>(100%)  | 0 (0%) | 0 (0%) | 0 (0%) | 36  |
| 0 | 0 | _B5 | 0 | . | 0 | _E4 | 0 | . | _G4 | 0 | 0 | _I6 | 47<br>(100%)  | 0 (0%) | 0 (0%) | 0 (0%) | 47  |

Supplemental material is neither peer-reviewed nor thoroughly edited by CJASN. The authors alone are responsible for the accuracy and presentation of the material.

|   |   |     |   |   |   |     |   |   |     |   |   |     |               |        |        |        |     |
|---|---|-----|---|---|---|-----|---|---|-----|---|---|-----|---------------|--------|--------|--------|-----|
| 0 | 0 | _B5 | 0 | . | 0 | _E4 | 0 | 0 | _G3 | . | 0 | _I5 | 180<br>(100%) | 0 (0%) | 0 (0%) | 0 (0%) | 180 |
| 0 | 0 | _B5 | 0 | . | 0 | _E4 | 0 | 0 | _G3 | . | 0 | _I6 | 152<br>(100%) | 0 (0%) | 0 (0%) | 0 (0%) | 152 |
| 0 | 0 | _B5 | 0 | . | 0 | _E4 | 0 | 0 | _G3 | 0 | 0 | _I5 | 810<br>(100%) | 0 (0%) | 0 (0%) | 0 (0%) | 810 |
| 0 | 0 | _B5 | 0 | . | 0 | _E4 | 0 | 0 | _G3 | 0 | 0 | _I6 | 684<br>(100%) | 0 (0%) | 0 (0%) | 0 (0%) | 684 |
| 0 | 0 | _B5 | 0 | . | 0 | _E4 | 0 | 0 | _G4 | . | 0 | _I5 | 144<br>(100%) | 0 (0%) | 0 (0%) | 0 (0%) | 144 |
| 0 | 0 | _B5 | 0 | . | 0 | _E4 | 0 | 0 | _G4 | . | 0 | _I6 | 188<br>(100%) | 0 (0%) | 0 (0%) | 0 (0%) | 188 |
| 0 | 0 | _B5 | 0 | . | 0 | _E4 | 0 | 0 | _G4 | 0 | 0 | _I5 | 684<br>(100%) | 0 (0%) | 0 (0%) | 0 (0%) | 684 |
| 0 | 0 | _B5 | 0 | . | 0 | _E4 | 0 | 0 | _G4 | 0 | 0 | _I6 | 893<br>(100%) | 0 (0%) | 0 (0%) | 0 (0%) | 893 |
| 0 | 0 | _B5 | 0 | . | 0 | _E4 | 0 | 1 | _G3 | 0 | 0 | _I5 | 45<br>(100%)  | 0 (0%) | 0 (0%) | 0 (0%) | 45  |
| 0 | 0 | _B5 | 0 | . | 0 | _E4 | 0 | 1 | _G3 | 0 | 0 | _I6 | 38<br>(100%)  | 0 (0%) | 0 (0%) | 0 (0%) | 38  |
| 0 | 0 | _B5 | 0 | . | 0 | _E5 | 0 | . | _G3 | 0 | 0 | _I5 | 34<br>(100%)  | 0 (0%) | 0 (0%) | 0 (0%) | 34  |
| 0 | 0 | _B5 | 0 | . | 0 | _E5 | 0 | . | _G3 | 0 | 0 | _I6 | 49<br>(100%)  | 0 (0%) | 0 (0%) | 0 (0%) | 49  |
| 0 | 0 | _B5 | 0 | . | 0 | _E5 | 0 | . | _G4 | 0 | 0 | _I5 | 49<br>(100%)  | 0 (0%) | 0 (0%) | 0 (0%) | 49  |
| 0 | 0 | _B5 | 0 | . | 0 | _E5 | 0 | . | _G4 | 0 | 0 | _I6 | 39<br>(100%)  | 0 (0%) | 0 (0%) | 0 (0%) | 39  |
| 0 | 0 | _B5 | 0 | . | 0 | _E5 | 0 | 0 | _G3 | . | 0 | _I5 | 136<br>(100%) | 0 (0%) | 0 (0%) | 0 (0%) | 136 |
| 0 | 0 | _B5 | 0 | . | 0 | _E5 | 0 | 0 | _G3 | . | 0 | _I6 | 196<br>(100%) | 0 (0%) | 0 (0%) | 0 (0%) | 196 |
| 0 | 0 | _B5 | 0 | . | 0 | _E5 | 0 | 0 | _G3 | 0 | 0 | _I5 | 612<br>(100%) | 0 (0%) | 0 (0%) | 0 (0%) | 612 |
| 0 | 0 | _B5 | 0 | . | 0 | _E5 | 0 | 0 | _G3 | 0 | 0 | _I6 | 882<br>(100%) | 0 (0%) | 0 (0%) | 0 (0%) | 882 |
| 0 | 0 | _B5 | 0 | . | 0 | _E5 | 0 | 0 | _G4 | . | 0 | _I5 | 196<br>(100%) | 0 (0%) | 0 (0%) | 0 (0%) | 196 |
| 0 | 0 | _B5 | 0 | . | 0 | _E5 | 0 | 0 | _G4 | . | 0 | _I6 | 156<br>(100%) | 0 (0%) | 0 (0%) | 0 (0%) | 156 |
| 0 | 0 | _B5 | 0 | . | 0 | _E5 | 0 | 0 | _G4 | 0 | 0 | _I5 | 931<br>(100%) | 0 (0%) | 0 (0%) | 0 (0%) | 931 |

Supplemental material is neither peer-reviewed nor thoroughly edited by CJASN. The authors alone are responsible for the accuracy and presentation of the material.

|   |   |     |   |   |   |     |   |   |     |   |   |     |                |        |        |        |      |
|---|---|-----|---|---|---|-----|---|---|-----|---|---|-----|----------------|--------|--------|--------|------|
| 0 | 0 | _B5 | 0 | . | 0 | _E5 | 0 | 0 | _G4 | 0 | 0 | _I6 | 741<br>(100%)  | 0 (0%) | 0 (0%) | 0 (0%) | 741  |
| 0 | 0 | _B5 | 0 | . | 0 | _E5 | 0 | 1 | _G3 | 0 | 0 | _I5 | 34<br>(100%)   | 0 (0%) | 0 (0%) | 0 (0%) | 34   |
| 0 | 0 | _B5 | 0 | . | 0 | _E5 | 0 | 1 | _G3 | 0 | 0 | _I6 | 49<br>(100%)   | 0 (0%) | 0 (0%) | 0 (0%) | 49   |
| 0 | 0 | _B5 | 0 | 0 | 0 | _E3 | 0 | . | _G3 | . | 0 | _I5 | 74<br>(100%)   | 0 (0%) | 0 (0%) | 0 (0%) | 74   |
| 0 | 0 | _B5 | 0 | 0 | 0 | _E3 | 0 | . | _G3 | . | 0 | _I6 | 84<br>(100%)   | 0 (0%) | 0 (0%) | 0 (0%) | 84   |
| 0 | 0 | _B5 | 0 | 0 | 0 | _E3 | 0 | . | _G4 | . | 0 | _I5 | 84<br>(100%)   | 0 (0%) | 0 (0%) | 0 (0%) | 84   |
| 0 | 0 | _B5 | 0 | 0 | 0 | _E3 | 0 | . | _G4 | . | 0 | _I6 | 84<br>(100%)   | 0 (0%) | 0 (0%) | 0 (0%) | 84   |
| 0 | 0 | _B5 | 0 | 0 | 0 | _E3 | 0 | 0 | _G3 | . | 0 | _I5 | 111<br>(100%)  | 0 (0%) | 0 (0%) | 0 (0%) | 111  |
| 0 | 0 | _B5 | 0 | 0 | 0 | _E3 | 0 | 0 | _G3 | . | 0 | _I6 | 126<br>(100%)  | 0 (0%) | 0 (0%) | 0 (0%) | 126  |
| 0 | 0 | _B5 | 0 | 0 | 0 | _E3 | 0 | 0 | _G3 | 0 | 0 | _I5 | 1147<br>(100%) | 0 (0%) | 0 (0%) | 0 (0%) | 1147 |
| 0 | 0 | _B5 | 0 | 0 | 0 | _E3 | 0 | 0 | _G3 | 0 | 0 | _I6 | 1302<br>(100%) | 0 (0%) | 0 (0%) | 0 (0%) | 1302 |
| 0 | 0 | _B5 | 0 | 0 | 0 | _E3 | 0 | 0 | _G4 | . | 0 | _I5 | 126<br>(100%)  | 0 (0%) | 0 (0%) | 0 (0%) | 126  |
| 0 | 0 | _B5 | 0 | 0 | 0 | _E3 | 0 | 0 | _G4 | . | 0 | _I6 | 126<br>(100%)  | 0 (0%) | 0 (0%) | 0 (0%) | 126  |
| 0 | 0 | _B5 | 0 | 0 | 0 | _E3 | 0 | 0 | _G4 | 0 | 0 | _I5 | 1386<br>(100%) | 0 (0%) | 0 (0%) | 0 (0%) | 1386 |
| 0 | 0 | _B5 | 0 | 0 | 0 | _E3 | 0 | 0 | _G4 | 0 | 0 | _I6 | 1386<br>(100%) | 0 (0%) | 0 (0%) | 0 (0%) | 1386 |
| 0 | 0 | _B5 | 0 | 0 | 0 | _E3 | 0 | 1 | _G3 | 0 | 0 | _I5 | 74<br>(100%)   | 0 (0%) | 0 (0%) | 0 (0%) | 74   |
| 0 | 0 | _B5 | 0 | 0 | 0 | _E3 | 0 | 1 | _G3 | 0 | 0 | _I6 | 84<br>(100%)   | 0 (0%) | 0 (0%) | 0 (0%) | 84   |
| 0 | 0 | _B5 | 0 | 0 | 0 | _E4 | 0 | . | _G3 | . | 0 | _I5 | 90<br>(100%)   | 0 (0%) | 0 (0%) | 0 (0%) | 90   |
| 0 | 0 | _B5 | 0 | 0 | 0 | _E4 | 0 | . | _G3 | . | 0 | _I6 | 76<br>(100%)   | 0 (0%) | 0 (0%) | 0 (0%) | 76   |
| 0 | 0 | _B5 | 0 | 0 | 0 | _E4 | 0 | . | _G4 | . | 0 | _I5 | 72<br>(100%)   | 0 (0%) | 0 (0%) | 0 (0%) | 72   |
| 0 | 0 | _B5 | 0 | 0 | 0 | _E4 | 0 | . | _G4 | . | 0 | _I6 | 94<br>(100%)   | 0 (0%) | 0 (0%) | 0 (0%) | 94   |

Supplemental material is neither peer-reviewed nor thoroughly edited by CJASN. The authors alone are responsible for the accuracy and presentation of the material.

|   |   |     |   |   |   |     |   |   |     |   |   |     |                |        |        |        |      |
|---|---|-----|---|---|---|-----|---|---|-----|---|---|-----|----------------|--------|--------|--------|------|
| 0 | 0 | _B5 | 0 | 0 | 0 | _E4 | 0 | 0 | _G3 | . | 0 | _I5 | 135<br>(100%)  | 0 (0%) | 0 (0%) | 0 (0%) | 135  |
| 0 | 0 | _B5 | 0 | 0 | 0 | _E4 | 0 | 0 | _G3 | . | 0 | _I6 | 114<br>(100%)  | 0 (0%) | 0 (0%) | 0 (0%) | 114  |
| 0 | 0 | _B5 | 0 | 0 | 0 | _E4 | 0 | 0 | _G3 | 0 | 0 | _I5 | 1395<br>(100%) | 0 (0%) | 0 (0%) | 0 (0%) | 1395 |
| 0 | 0 | _B5 | 0 | 0 | 0 | _E4 | 0 | 0 | _G3 | 0 | 0 | _I6 | 1178<br>(100%) | 0 (0%) | 0 (0%) | 0 (0%) | 1178 |
| 0 | 0 | _B5 | 0 | 0 | 0 | _E4 | 0 | 0 | _G4 | . | 0 | _I5 | 108<br>(100%)  | 0 (0%) | 0 (0%) | 0 (0%) | 108  |
| 0 | 0 | _B5 | 0 | 0 | 0 | _E4 | 0 | 0 | _G4 | . | 0 | _I6 | 141<br>(100%)  | 0 (0%) | 0 (0%) | 0 (0%) | 141  |
| 0 | 0 | _B5 | 0 | 0 | 0 | _E4 | 0 | 0 | _G4 | 0 | 0 | _I5 | 1188<br>(100%) | 0 (0%) | 0 (0%) | 0 (0%) | 1188 |
| 0 | 0 | _B5 | 0 | 0 | 0 | _E4 | 0 | 0 | _G4 | 0 | 0 | _I6 | 1551<br>(100%) | 0 (0%) | 0 (0%) | 0 (0%) | 1551 |
| 0 | 0 | _B5 | 0 | 0 | 0 | _E4 | 0 | 1 | _G3 | 0 | 0 | _I5 | 90<br>(100%)   | 0 (0%) | 0 (0%) | 0 (0%) | 90   |
| 0 | 0 | _B5 | 0 | 0 | 0 | _E4 | 0 | 1 | _G3 | 0 | 0 | _I6 | 76<br>(100%)   | 0 (0%) | 0 (0%) | 0 (0%) | 76   |
| 0 | 0 | _B5 | 0 | 0 | 0 | _E5 | 0 | . | _G3 | . | 0 | _I5 | 68<br>(100%)   | 0 (0%) | 0 (0%) | 0 (0%) | 68   |
| 0 | 0 | _B5 | 0 | 0 | 0 | _E5 | 0 | . | _G3 | . | 0 | _I6 | 98<br>(100%)   | 0 (0%) | 0 (0%) | 0 (0%) | 98   |
| 0 | 0 | _B5 | 0 | 0 | 0 | _E5 | 0 | . | _G4 | . | 0 | _I5 | 98<br>(100%)   | 0 (0%) | 0 (0%) | 0 (0%) | 98   |
| 0 | 0 | _B5 | 0 | 0 | 0 | _E5 | 0 | . | _G4 | . | 0 | _I6 | 78<br>(100%)   | 0 (0%) | 0 (0%) | 0 (0%) | 78   |
| 0 | 0 | _B5 | 0 | 0 | 0 | _E5 | 0 | 0 | _G3 | . | 0 | _I5 | 102<br>(100%)  | 0 (0%) | 0 (0%) | 0 (0%) | 102  |
| 0 | 0 | _B5 | 0 | 0 | 0 | _E5 | 0 | 0 | _G3 | . | 0 | _I6 | 147<br>(100%)  | 0 (0%) | 0 (0%) | 0 (0%) | 147  |
| 0 | 0 | _B5 | 0 | 0 | 0 | _E5 | 0 | 0 | _G3 | 0 | 0 | _I5 | 1054<br>(100%) | 0 (0%) | 0 (0%) | 0 (0%) | 1054 |
| 0 | 0 | _B5 | 0 | 0 | 0 | _E5 | 0 | 0 | _G3 | 0 | 0 | _I6 | 1519<br>(100%) | 0 (0%) | 0 (0%) | 0 (0%) | 1519 |
| 0 | 0 | _B5 | 0 | 0 | 0 | _E5 | 0 | 0 | _G4 | . | 0 | _I5 | 147<br>(100%)  | 0 (0%) | 0 (0%) | 0 (0%) | 147  |
| 0 | 0 | _B5 | 0 | 0 | 0 | _E5 | 0 | 0 | _G4 | . | 0 | _I6 | 117<br>(100%)  | 0 (0%) | 0 (0%) | 0 (0%) | 117  |
| 0 | 0 | _B5 | 0 | 0 | 0 | _E5 | 0 | 0 | _G4 | 0 | 0 | _I5 | 1617<br>(100%) | 0 (0%) | 0 (0%) | 0 (0%) | 1617 |

|   |   |     |   |   |   |     |   |   |     |   |   |     |                |           |        |        |      |
|---|---|-----|---|---|---|-----|---|---|-----|---|---|-----|----------------|-----------|--------|--------|------|
| 0 | 0 | _B5 | 0 | 0 | 0 | _E5 | 0 | 0 | _G4 | 0 | 0 | _I6 | 1287<br>(100%) | 0 (0%)    | 0 (0%) | 0 (0%) | 1287 |
| 0 | 0 | _B5 | 0 | 0 | 0 | _E5 | 0 | 1 | _G3 | 0 | 0 | _I5 | 68<br>(100%)   | 0 (0%)    | 0 (0%) | 0 (0%) | 68   |
| 0 | 0 | _B5 | 0 | 0 | 0 | _E5 | 0 | 1 | _G3 | 0 | 0 | _I6 | 98<br>(100%)   | 0 (0%)    | 0 (0%) | 0 (0%) | 98   |
| 0 | 1 | _B3 | 0 | . | 0 | _E3 | 0 | 0 | _G4 | 0 | 0 | _I5 | 44<br>(100%)   | 0 (0%)    | 0 (0%) | 0 (0%) | 44   |
| 0 | 1 | _B3 | 0 | . | 0 | _E3 | 0 | 0 | _G4 | 0 | 0 | _I6 | 42<br>(100%)   | 0 (0%)    | 0 (0%) | 0 (0%) | 42   |
| 0 | 1 | _B3 | 0 | . | 0 | _E3 | 0 | 1 | _G3 | 0 | 0 | _I5 | 0 (0%)         | 41 (100%) | 0 (0%) | 0 (0%) | 41   |
| 0 | 1 | _B3 | 0 | . | 0 | _E3 | 0 | 1 | _G3 | 0 | 0 | _I6 | 0 (0%)         | 39 (100%) | 0 (0%) | 0 (0%) | 39   |
| 0 | 1 | _B3 | 0 | . | 0 | _E4 | 0 | 0 | _G4 | 0 | 0 | _I5 | 40<br>(100%)   | 0 (0%)    | 0 (0%) | 0 (0%) | 40   |
| 0 | 1 | _B3 | 0 | . | 0 | _E4 | 0 | 0 | _G4 | 0 | 0 | _I6 | 46<br>(100%)   | 0 (0%)    | 0 (0%) | 0 (0%) | 46   |
| 0 | 1 | _B3 | 0 | . | 0 | _E4 | 0 | 1 | _G3 | 0 | 0 | _I5 | 0 (0%)         | 45 (100%) | 0 (0%) | 0 (0%) | 45   |
| 0 | 1 | _B3 | 0 | . | 0 | _E4 | 0 | 1 | _G3 | 0 | 0 | _I6 | 0 (0%)         | 34 (100%) | 0 (0%) | 0 (0%) | 34   |
| 0 | 1 | _B3 | 0 | . | 0 | _E5 | 0 | 0 | _G3 | 0 | 0 | _I6 | 1<br>(100%)    | 0 (0%)    | 0 (0%) | 0 (0%) | 1    |
| 0 | 1 | _B3 | 0 | . | 0 | _E5 | 0 | 0 | _G4 | 0 | 0 | _I5 | 47<br>(100%)   | 0 (0%)    | 0 (0%) | 0 (0%) | 47   |
| 0 | 1 | _B3 | 0 | . | 0 | _E5 | 0 | 0 | _G4 | 0 | 0 | _I6 | 40<br>(100%)   | 0 (0%)    | 0 (0%) | 0 (0%) | 40   |
| 0 | 1 | _B3 | 0 | . | 0 | _E5 | 0 | 1 | _G3 | 0 | 0 | _I5 | 0 (0%)         | 41 (100%) | 0 (0%) | 0 (0%) | 41   |
| 0 | 1 | _B3 | 0 | . | 0 | _E5 | 0 | 1 | _G3 | 0 | 0 | _I6 | 0 (0%)         | 40 (100%) | 0 (0%) | 0 (0%) | 40   |
| 0 | 1 | _B3 | 0 | 0 | 0 | _E3 | 0 | 0 | _G3 | . | 0 | _I5 | 41<br>(100%)   | 0 (0%)    | 0 (0%) | 0 (0%) | 41   |
| 0 | 1 | _B3 | 0 | 0 | 0 | _E3 | 0 | 0 | _G3 | . | 0 | _I6 | 39<br>(100%)   | 0 (0%)    | 0 (0%) | 0 (0%) | 39   |
| 0 | 1 | _B3 | 0 | 0 | 0 | _E3 | 0 | 0 | _G4 | . | 0 | _I5 | 44<br>(100%)   | 0 (0%)    | 0 (0%) | 0 (0%) | 44   |
| 0 | 1 | _B3 | 0 | 0 | 0 | _E3 | 0 | 0 | _G4 | . | 0 | _I6 | 42<br>(100%)   | 0 (0%)    | 0 (0%) | 0 (0%) | 42   |
| 0 | 1 | _B3 | 0 | 0 | 0 | _E3 | 0 | 0 | _G4 | 0 | 0 | _I5 | 44<br>(100%)   | 0 (0%)    | 0 (0%) | 0 (0%) | 44   |

|   |   |     |   |   |   |     |   |   |     |   |   |     |                |           |        |        |      |
|---|---|-----|---|---|---|-----|---|---|-----|---|---|-----|----------------|-----------|--------|--------|------|
| 0 | 1 | _B3 | 0 | 0 | 0 | _E3 | 0 | 0 | _G4 | 0 | 0 | _I6 | 42<br>(100%)   | 0 (0%)    | 0 (0%) | 0 (0%) | 42   |
| 0 | 1 | _B3 | 0 | 0 | 0 | _E3 | 0 | 1 | _G3 | 0 | 0 | _I5 | 0 (0%)         | 41 (100%) | 0 (0%) | 0 (0%) | 41   |
| 0 | 1 | _B3 | 0 | 0 | 0 | _E3 | 0 | 1 | _G3 | 0 | 0 | _I6 | 0 (0%)         | 39 (100%) | 0 (0%) | 0 (0%) | 39   |
| 0 | 1 | _B3 | 0 | 0 | 0 | _E4 | 0 | 0 | _G3 | . | 0 | _I5 | 45<br>(100%)   | 0 (0%)    | 0 (0%) | 0 (0%) | 45   |
| 0 | 1 | _B3 | 0 | 0 | 0 | _E4 | 0 | 0 | _G3 | . | 0 | _I6 | 34<br>(100%)   | 0 (0%)    | 0 (0%) | 0 (0%) | 34   |
| 0 | 1 | _B3 | 0 | 0 | 0 | _E4 | 0 | 0 | _G4 | . | 0 | _I5 | 40<br>(100%)   | 0 (0%)    | 0 (0%) | 0 (0%) | 40   |
| 0 | 1 | _B3 | 0 | 0 | 0 | _E4 | 0 | 0 | _G4 | . | 0 | _I6 | 46<br>(100%)   | 0 (0%)    | 0 (0%) | 0 (0%) | 46   |
| 0 | 1 | _B3 | 0 | 0 | 0 | _E4 | 0 | 0 | _G4 | 0 | 0 | _I5 | 40<br>(100%)   | 0 (0%)    | 0 (0%) | 0 (0%) | 40   |
| 0 | 1 | _B3 | 0 | 0 | 0 | _E4 | 0 | 0 | _G4 | 0 | 0 | _I6 | 46<br>(100%)   | 0 (0%)    | 0 (0%) | 0 (0%) | 46   |
| 0 | 1 | _B3 | 0 | 0 | 0 | _E4 | 0 | 1 | _G3 | 0 | 0 | _I5 | 0 (0%)         | 45 (100%) | 0 (0%) | 0 (0%) | 45   |
| 0 | 1 | _B3 | 0 | 0 | 0 | _E4 | 0 | 1 | _G3 | 0 | 0 | _I6 | 0 (0%)         | 34 (100%) | 0 (0%) | 0 (0%) | 34   |
| 0 | 1 | _B3 | 0 | 0 | 0 | _E5 | 0 | 0 | _G3 | . | 0 | _I5 | 41<br>(100%)   | 0 (0%)    | 0 (0%) | 0 (0%) | 41   |
| 0 | 1 | _B3 | 0 | 0 | 0 | _E5 | 0 | 0 | _G3 | . | 0 | _I6 | 41<br>(100%)   | 0 (0%)    | 0 (0%) | 0 (0%) | 41   |
| 0 | 1 | _B3 | 0 | 0 | 0 | _E5 | 0 | 0 | _G3 | 0 | 0 | _I6 | 1<br>(100%)    | 0 (0%)    | 0 (0%) | 0 (0%) | 1    |
| 0 | 1 | _B3 | 0 | 0 | 0 | _E5 | 0 | 0 | _G4 | . | 0 | _I5 | 47<br>(100%)   | 0 (0%)    | 0 (0%) | 0 (0%) | 47   |
| 0 | 1 | _B3 | 0 | 0 | 0 | _E5 | 0 | 0 | _G4 | . | 0 | _I6 | 40<br>(100%)   | 0 (0%)    | 0 (0%) | 0 (0%) | 40   |
| 0 | 1 | _B3 | 0 | 0 | 0 | _E5 | 0 | 0 | _G4 | 0 | 0 | _I5 | 47<br>(100%)   | 0 (0%)    | 0 (0%) | 0 (0%) | 47   |
| 0 | 1 | _B3 | 0 | 0 | 0 | _E5 | 0 | 0 | _G4 | 0 | 0 | _I6 | 40<br>(100%)   | 0 (0%)    | 0 (0%) | 0 (0%) | 40   |
| 0 | 1 | _B3 | 0 | 0 | 0 | _E5 | 0 | 1 | _G3 | 0 | 0 | _I5 | 0 (0%)         | 41 (100%) | 0 (0%) | 0 (0%) | 41   |
| 0 | 1 | _B3 | 0 | 0 | 0 | _E5 | 0 | 1 | _G3 | 0 | 0 | _I6 | 0 (0%)         | 40 (100%) | 0 (0%) | 0 (0%) | 40   |
| 1 | 0 | _B3 | 0 | . | 0 | _E3 | 0 | 0 | _G3 | 0 | 0 | _I5 | 1312<br>(100%) | 0 (0%)    | 0 (0%) | 0 (0%) | 1312 |

|   |   |     |   |   |   |     |   |   |     |   |   |     |                     |                 |        |        |      |
|---|---|-----|---|---|---|-----|---|---|-----|---|---|-----|---------------------|-----------------|--------|--------|------|
| 1 | 0 | _B3 | 0 | . | 0 | _E3 | 0 | 0 | _G3 | 0 | 0 | _I6 | 1248<br>(100%)      | 0 (0%)          | 0 (0%) | 0 (0%) | 1248 |
| 1 | 0 | _B3 | 0 | . | 0 | _E3 | 0 | 0 | _G4 | . | 0 | _I5 | 44<br>(100%)        | 0 (0%)          | 0 (0%) | 0 (0%) | 44   |
| 1 | 0 | _B3 | 0 | . | 0 | _E3 | 0 | 0 | _G4 | . | 0 | _I6 | 42<br>(100%)        | 0 (0%)          | 0 (0%) | 0 (0%) | 42   |
| 1 | 0 | _B3 | 0 | . | 0 | _E3 | 0 | 0 | _G4 | 0 | 0 | _I5 | 1408<br>(100%)      | 0 (0%)          | 0 (0%) | 0 (0%) | 1408 |
| 1 | 0 | _B3 | 0 | . | 0 | _E3 | 0 | 0 | _G4 | 0 | 0 | _I6 | 1344<br>(100%)      | 0 (0%)          | 0 (0%) | 0 (0%) | 1344 |
| 1 | 0 | _B3 | 0 | . | 0 | _E3 | 0 | 1 | _G3 | . | 0 | _I5 | 0 (0%)              | 82 (100%)       | 0 (0%) | 0 (0%) | 82   |
| 1 | 0 | _B3 | 0 | . | 0 | _E3 | 0 | 1 | _G3 | . | 0 | _I6 | 78<br>(100%)        | 0 (0%)          | 0 (0%) | 0 (0%) | 78   |
| 1 | 0 | _B3 | 0 | . | 0 | _E3 | 0 | 1 | _G4 | . | 0 | _I5 | 0 (0%)              | 44 (100%)       | 0 (0%) | 0 (0%) | 44   |
| 1 | 0 | _B3 | 0 | . | 0 | _E3 | 0 | 1 | _G4 | . | 0 | _I6 | 42<br>(100%)        | 0 (0%)          | 0 (0%) | 0 (0%) | 42   |
| 1 | 0 | _B3 | 0 | . | 0 | _E4 | 0 | 0 | _G3 | 0 | 0 | _I5 | 1440<br>(100%)      | 0 (0%)          | 0 (0%) | 0 (0%) | 1440 |
| 1 | 0 | _B3 | 0 | . | 0 | _E4 | 0 | 0 | _G3 | 0 | 0 | _I6 | 1088<br>(100%)      | 0 (0%)          | 0 (0%) | 0 (0%) | 1088 |
| 1 | 0 | _B3 | 0 | . | 0 | _E4 | 0 | 0 | _G4 | . | 0 | _I5 | 40<br>(100%)        | 0 (0%)          | 0 (0%) | 0 (0%) | 40   |
| 1 | 0 | _B3 | 0 | . | 0 | _E4 | 0 | 0 | _G4 | . | 0 | _I6 | 46<br>(100%)        | 0 (0%)          | 0 (0%) | 0 (0%) | 46   |
| 1 | 0 | _B3 | 0 | . | 0 | _E4 | 0 | 0 | _G4 | 0 | 0 | _I5 | 1280<br>(100%)      | 0 (0%)          | 0 (0%) | 0 (0%) | 1280 |
| 1 | 0 | _B3 | 0 | . | 0 | _E4 | 0 | 0 | _G4 | 0 | 0 | _I6 | 1472<br>(100%)      | 0 (0%)          | 0 (0%) | 0 (0%) | 1472 |
| 1 | 0 | _B3 | 0 | . | 0 | _E4 | 0 | 1 | _G3 | . | 0 | _I5 | 16<br>(17.778<br>%) | 74<br>(82.222%) | 0 (0%) | 0 (0%) | 90   |
| 1 | 0 | _B3 | 0 | . | 0 | _E4 | 0 | 1 | _G3 | . | 0 | _I6 | 68<br>(100%)        | 0 (0%)          | 0 (0%) | 0 (0%) | 68   |
| 1 | 0 | _B3 | 0 | . | 0 | _E4 | 0 | 1 | _G4 | . | 0 | _I5 | 0 (0%)              | 40 (100%)       | 0 (0%) | 0 (0%) | 40   |
| 1 | 0 | _B3 | 0 | . | 0 | _E4 | 0 | 1 | _G4 | . | 0 | _I6 | 0 (0%)              | 46 (100%)       | 0 (0%) | 0 (0%) | 46   |
| 1 | 0 | _B3 | 0 | . | 0 | _E5 | 0 | 0 | _G3 | . | 0 | _I6 | 1<br>(100%)         | 0 (0%)          | 0 (0%) | 0 (0%) | 1    |
| 1 | 0 | _B3 | 0 | . | 0 | _E5 | 0 | 0 | _G3 | 0 | 0 | _I5 | 1312<br>(100%)      | 0 (0%)          | 0 (0%) | 0 (0%) | 1312 |

|   |   |     |   |   |   |     |   |   |     |   |   |     |                     |                 |        |        |      |
|---|---|-----|---|---|---|-----|---|---|-----|---|---|-----|---------------------|-----------------|--------|--------|------|
| 1 | 0 | _B3 | 0 | . | 0 | _E5 | 0 | 0 | _G3 | 0 | 0 | _I6 | 1312<br>(100%)      | 0 (0%)          | 0 (0%) | 0 (0%) | 1312 |
| 1 | 0 | _B3 | 0 | . | 0 | _E5 | 0 | 0 | _G4 | . | 0 | _I5 | 47<br>(100%)        | 0 (0%)          | 0 (0%) | 0 (0%) | 47   |
| 1 | 0 | _B3 | 0 | . | 0 | _E5 | 0 | 0 | _G4 | . | 0 | _I6 | 40<br>(100%)        | 0 (0%)          | 0 (0%) | 0 (0%) | 40   |
| 1 | 0 | _B3 | 0 | . | 0 | _E5 | 0 | 0 | _G4 | 0 | 0 | _I5 | 1504<br>(100%)      | 0 (0%)          | 0 (0%) | 0 (0%) | 1504 |
| 1 | 0 | _B3 | 0 | . | 0 | _E5 | 0 | 0 | _G4 | 0 | 0 | _I6 | 1280<br>(100%)      | 0 (0%)          | 0 (0%) | 0 (0%) | 1280 |
| 1 | 0 | _B3 | 0 | . | 0 | _E5 | 0 | 1 | _G3 | . | 0 | _I5 | 14<br>(17.073<br>%) | 68<br>(82.927%) | 0 (0%) | 0 (0%) | 82   |
| 1 | 0 | _B3 | 0 | . | 0 | _E5 | 0 | 1 | _G3 | . | 0 | _I6 | 80<br>(98.765<br>%) | 1<br>(1.235%)   | 0 (0%) | 0 (0%) | 81   |
| 1 | 0 | _B3 | 0 | . | 0 | _E5 | 0 | 1 | _G4 | . | 0 | _I5 | 0 (0%)              | 47 (100%)       | 0 (0%) | 0 (0%) | 47   |
| 1 | 0 | _B3 | 0 | . | 0 | _E5 | 0 | 1 | _G4 | . | 0 | _I6 | 0 (0%)              | 40 (100%)       | 0 (0%) | 0 (0%) | 40   |
| 1 | 0 | _B3 | 0 | 0 | 0 | _E3 | 0 | . | _G3 | . | 0 | _I5 | 164<br>(100%)       | 0 (0%)          | 0 (0%) | 0 (0%) | 164  |
| 1 | 0 | _B3 | 0 | 0 | 0 | _E3 | 0 | . | _G3 | . | 0 | _I6 | 156<br>(100%)       | 0 (0%)          | 0 (0%) | 0 (0%) | 156  |
| 1 | 0 | _B3 | 0 | 0 | 0 | _E3 | 0 | . | _G3 | 0 | 0 | _I5 | 41<br>(100%)        | 0 (0%)          | 0 (0%) | 0 (0%) | 41   |
| 1 | 0 | _B3 | 0 | 0 | 0 | _E3 | 0 | . | _G3 | 0 | 0 | _I6 | 39<br>(100%)        | 0 (0%)          | 0 (0%) | 0 (0%) | 39   |
| 1 | 0 | _B3 | 0 | 0 | 0 | _E3 | 0 | . | _G4 | . | 0 | _I5 | 176<br>(100%)       | 0 (0%)          | 0 (0%) | 0 (0%) | 176  |
| 1 | 0 | _B3 | 0 | 0 | 0 | _E3 | 0 | . | _G4 | . | 0 | _I6 | 168<br>(100%)       | 0 (0%)          | 0 (0%) | 0 (0%) | 168  |
| 1 | 0 | _B3 | 0 | 0 | 0 | _E3 | 0 | . | _G4 | 0 | 0 | _I5 | 44<br>(100%)        | 0 (0%)          | 0 (0%) | 0 (0%) | 44   |
| 1 | 0 | _B3 | 0 | 0 | 0 | _E3 | 0 | . | _G4 | 0 | 0 | _I6 | 42<br>(100%)        | 0 (0%)          | 0 (0%) | 0 (0%) | 42   |
| 1 | 0 | _B3 | 0 | 0 | 0 | _E3 | 0 | 0 | _G3 | . | 0 | _I5 | 451<br>(100%)       | 0 (0%)          | 0 (0%) | 0 (0%) | 451  |
| 1 | 0 | _B3 | 0 | 0 | 0 | _E3 | 0 | 0 | _G3 | . | 0 | _I6 | 429<br>(100%)       | 0 (0%)          | 0 (0%) | 0 (0%) | 429  |
| 1 | 0 | _B3 | 0 | 0 | 0 | _E3 | 0 | 0 | _G3 | 0 | 0 | _I5 | 6601<br>(100%)      | 0 (0%)          | 0 (0%) | 0 (0%) | 6601 |
| 1 | 0 | _B3 | 0 | 0 | 0 | _E3 | 0 | 0 | _G3 | 0 | 0 | _I6 | 6279<br>(100%)      | 0 (0%)          | 0 (0%) | 0 (0%) | 6279 |

Supplemental material is neither peer-reviewed nor thoroughly edited by CJASN. The authors alone are responsible for the accuracy and presentation of the material.

|   |   |     |   |   |   |     |   |   |     |   |   |     |                |               |        |        |      |
|---|---|-----|---|---|---|-----|---|---|-----|---|---|-----|----------------|---------------|--------|--------|------|
| 1 | 0 | _B3 | 0 | 0 | 0 | _E3 | 0 | 0 | _G3 | 1 | 0 | _I5 | 82<br>(100%)   | 0 (0%)        | 0 (0%) | 0 (0%) | 82   |
| 1 | 0 | _B3 | 0 | 0 | 0 | _E3 | 0 | 0 | _G3 | 1 | 0 | _I6 | 78<br>(100%)   | 0 (0%)        | 0 (0%) | 0 (0%) | 78   |
| 1 | 0 | _B3 | 0 | 0 | 0 | _E3 | 0 | 0 | _G4 | . | 0 | _I5 | 484<br>(100%)  | 0 (0%)        | 0 (0%) | 0 (0%) | 484  |
| 1 | 0 | _B3 | 0 | 0 | 0 | _E3 | 0 | 0 | _G4 | . | 0 | _I6 | 462<br>(100%)  | 0 (0%)        | 0 (0%) | 0 (0%) | 462  |
| 1 | 0 | _B3 | 0 | 0 | 0 | _E3 | 0 | 0 | _G4 | 0 | 0 | _I5 | 7436<br>(100%) | 0 (0%)        | 0 (0%) | 0 (0%) | 7436 |
| 1 | 0 | _B3 | 0 | 0 | 0 | _E3 | 0 | 0 | _G4 | 0 | 0 | _I6 | 7098<br>(100%) | 0 (0%)        | 0 (0%) | 0 (0%) | 7098 |
| 1 | 0 | _B3 | 0 | 0 | 0 | _E3 | 0 | 0 | _G4 | 1 | 0 | _I5 | 0 (0%)         | 88 (100%)     | 0 (0%) | 0 (0%) | 88   |
| 1 | 0 | _B3 | 0 | 0 | 0 | _E3 | 0 | 0 | _G4 | 1 | 0 | _I6 | 84<br>(100%)   | 0 (0%)        | 0 (0%) | 0 (0%) | 84   |
| 1 | 0 | _B3 | 0 | 0 | 0 | _E3 | 0 | 1 | _G3 | . | 0 | _I5 | 0 (0%)         | 41 (100%)     | 0 (0%) | 0 (0%) | 41   |
| 1 | 0 | _B3 | 0 | 0 | 0 | _E3 | 0 | 1 | _G3 | . | 0 | _I6 | 39<br>(100%)   | 0 (0%)        | 0 (0%) | 0 (0%) | 39   |
| 1 | 0 | _B3 | 0 | 0 | 0 | _E3 | 0 | 1 | _G3 | 0 | 0 | _I5 | 0 (0%)         | 328<br>(100%) | 0 (0%) | 0 (0%) | 328  |
| 1 | 0 | _B3 | 0 | 0 | 0 | _E3 | 0 | 1 | _G3 | 0 | 0 | _I6 | 312<br>(100%)  | 0 (0%)        | 0 (0%) | 0 (0%) | 312  |
| 1 | 0 | _B3 | 0 | 0 | 0 | _E3 | 0 | 1 | _G4 | . | 0 | _I5 | 0 (0%)         | 44 (100%)     | 0 (0%) | 0 (0%) | 44   |
| 1 | 0 | _B3 | 0 | 0 | 0 | _E3 | 0 | 1 | _G4 | . | 0 | _I6 | 42<br>(100%)   | 0 (0%)        | 0 (0%) | 0 (0%) | 42   |
| 1 | 0 | _B3 | 0 | 0 | 0 | _E3 | 1 | 0 | _G3 | 0 | 0 | _I5 | 123<br>(100%)  | 0 (0%)        | 0 (0%) | 0 (0%) | 123  |
| 1 | 0 | _B3 | 0 | 0 | 0 | _E3 | 1 | 0 | _G3 | 0 | 0 | _I6 | 117<br>(100%)  | 0 (0%)        | 0 (0%) | 0 (0%) | 117  |
| 1 | 0 | _B3 | 0 | 0 | 0 | _E3 | 1 | 0 | _G4 | 0 | 0 | _I5 | 176<br>(100%)  | 0 (0%)        | 0 (0%) | 0 (0%) | 176  |
| 1 | 0 | _B3 | 0 | 0 | 0 | _E3 | 1 | 0 | _G4 | 0 | 0 | _I6 | 168<br>(100%)  | 0 (0%)        | 0 (0%) | 0 (0%) | 168  |
| 1 | 0 | _B3 | 0 | 0 | 0 | _E3 | 1 | 1 | _G3 | 0 | 0 | _I5 | 0 (0%)         | 41 (100%)     | 0 (0%) | 0 (0%) | 41   |
| 1 | 0 | _B3 | 0 | 0 | 0 | _E3 | 1 | 1 | _G3 | 0 | 0 | _I6 | 39<br>(100%)   | 0 (0%)        | 0 (0%) | 0 (0%) | 39   |
| 1 | 0 | _B3 | 0 | 0 | 0 | _E4 | 0 | . | _G3 | . | 0 | _I5 | 180<br>(100%)  | 0 (0%)        | 0 (0%) | 0 (0%) | 180  |

Supplemental material is neither peer-reviewed nor thoroughly edited by CJASN. The authors alone are responsible for the accuracy and presentation of the material.

|   |   |     |   |   |   |     |   |   |     |   |   |     |                    |                 |        |        |      |
|---|---|-----|---|---|---|-----|---|---|-----|---|---|-----|--------------------|-----------------|--------|--------|------|
| 1 | 0 | _B3 | 0 | 0 | 0 | _E4 | 0 | . | _G3 | . | 0 | _I6 | 136<br>(100%)      | 0 (0%)          | 0 (0%) | 0 (0%) | 136  |
| 1 | 0 | _B3 | 0 | 0 | 0 | _E4 | 0 | . | _G3 | 0 | 0 | _I5 | 45<br>(100%)       | 0 (0%)          | 0 (0%) | 0 (0%) | 45   |
| 1 | 0 | _B3 | 0 | 0 | 0 | _E4 | 0 | . | _G3 | 0 | 0 | _I6 | 34<br>(100%)       | 0 (0%)          | 0 (0%) | 0 (0%) | 34   |
| 1 | 0 | _B3 | 0 | 0 | 0 | _E4 | 0 | . | _G4 | . | 0 | _I5 | 160<br>(100%)      | 0 (0%)          | 0 (0%) | 0 (0%) | 160  |
| 1 | 0 | _B3 | 0 | 0 | 0 | _E4 | 0 | . | _G4 | . | 0 | _I6 | 184<br>(100%)      | 0 (0%)          | 0 (0%) | 0 (0%) | 184  |
| 1 | 0 | _B3 | 0 | 0 | 0 | _E4 | 0 | . | _G4 | 0 | 0 | _I5 | 40<br>(100%)       | 0 (0%)          | 0 (0%) | 0 (0%) | 40   |
| 1 | 0 | _B3 | 0 | 0 | 0 | _E4 | 0 | . | _G4 | 0 | 0 | _I6 | 46<br>(100%)       | 0 (0%)          | 0 (0%) | 0 (0%) | 46   |
| 1 | 0 | _B3 | 0 | 0 | 0 | _E4 | 0 | 0 | _G3 | . | 0 | _I5 | 540<br>(100%)      | 0 (0%)          | 0 (0%) | 0 (0%) | 540  |
| 1 | 0 | _B3 | 0 | 0 | 0 | _E4 | 0 | 0 | _G3 | . | 0 | _I6 | 408<br>(100%)      | 0 (0%)          | 0 (0%) | 0 (0%) | 408  |
| 1 | 0 | _B3 | 0 | 0 | 0 | _E4 | 0 | 0 | _G3 | 0 | 0 | _I5 | 7551<br>(100%)     | 0 (0%)          | 0 (0%) | 0 (0%) | 7551 |
| 1 | 0 | _B3 | 0 | 0 | 0 | _E4 | 0 | 0 | _G3 | 0 | 0 | _I6 | 5697<br>(100%)     | 0 (0%)          | 0 (0%) | 0 (0%) | 5697 |
| 1 | 0 | _B3 | 0 | 0 | 0 | _E4 | 0 | 0 | _G3 | 1 | 0 | _I5 | 90<br>(100%)       | 0 (0%)          | 0 (0%) | 0 (0%) | 90   |
| 1 | 0 | _B3 | 0 | 0 | 0 | _E4 | 0 | 0 | _G3 | 1 | 0 | _I6 | 68<br>(100%)       | 0 (0%)          | 0 (0%) | 0 (0%) | 68   |
| 1 | 0 | _B3 | 0 | 0 | 0 | _E4 | 0 | 0 | _G4 | . | 0 | _I5 | 480<br>(100%)      | 0 (0%)          | 0 (0%) | 0 (0%) | 480  |
| 1 | 0 | _B3 | 0 | 0 | 0 | _E4 | 0 | 0 | _G4 | . | 0 | _I6 | 552<br>(100%)      | 0 (0%)          | 0 (0%) | 0 (0%) | 552  |
| 1 | 0 | _B3 | 0 | 0 | 0 | _E4 | 0 | 0 | _G4 | 0 | 0 | _I5 | 7348<br>(100%)     | 0 (0%)          | 0 (0%) | 0 (0%) | 7348 |
| 1 | 0 | _B3 | 0 | 0 | 0 | _E4 | 0 | 0 | _G4 | 0 | 0 | _I6 | 8453<br>(100%)     | 0 (0%)          | 0 (0%) | 0 (0%) | 8453 |
| 1 | 0 | _B3 | 0 | 0 | 0 | _E4 | 0 | 0 | _G4 | 1 | 0 | _I5 | 20<br>(25%)        | 60 (75%)        | 0 (0%) | 0 (0%) | 80   |
| 1 | 0 | _B3 | 0 | 0 | 0 | _E4 | 0 | 0 | _G4 | 1 | 0 | _I6 | 92<br>(100%)       | 0 (0%)          | 0 (0%) | 0 (0%) | 92   |
| 1 | 0 | _B3 | 0 | 0 | 0 | _E4 | 0 | 1 | _G3 | . | 0 | _I5 | 8<br>(17.778<br>%) | 37<br>(82.222%) | 0 (0%) | 0 (0%) | 45   |
| 1 | 0 | _B3 | 0 | 0 | 0 | _E4 | 0 | 1 | _G3 | . | 0 | _I6 | 34<br>(100%)       | 0 (0%)          | 0 (0%) | 0 (0%) | 34   |

|   |   |     |   |   |   |     |   |   |     |   |   |     |                      |                  |        |        |     |
|---|---|-----|---|---|---|-----|---|---|-----|---|---|-----|----------------------|------------------|--------|--------|-----|
| 1 | 0 | _B3 | 0 | 0 | 0 | _E4 | 0 | 1 | _G3 | 0 | 0 | _I5 | 203<br>(28.194<br>%) | 517<br>(71.806%) | 0 (0%) | 0 (0%) | 720 |
| 1 | 0 | _B3 | 0 | 0 | 0 | _E4 | 0 | 1 | _G3 | 0 | 0 | _I6 | 544<br>(100%)        | 0 (0%)           | 0 (0%) | 0 (0%) | 544 |
| 1 | 0 | _B3 | 0 | 0 | 0 | _E4 | 0 | 1 | _G4 | . | 0 | _I5 | 0 (0%)               | 40 (100%)        | 0 (0%) | 0 (0%) | 40  |
| 1 | 0 | _B3 | 0 | 0 | 0 | _E4 | 0 | 1 | _G4 | . | 0 | _I6 | 0 (0%)               | 46 (100%)        | 0 (0%) | 0 (0%) | 46  |
| 1 | 0 | _B3 | 0 | 0 | 0 | _E4 | 1 | 0 | _G3 | 0 | 0 | _I5 | 135<br>(100%)        | 0 (0%)           | 0 (0%) | 0 (0%) | 135 |
| 1 | 0 | _B3 | 0 | 0 | 0 | _E4 | 1 | 0 | _G3 | 0 | 0 | _I6 | 102<br>(100%)        | 0 (0%)           | 0 (0%) | 0 (0%) | 102 |
| 1 | 0 | _B3 | 0 | 0 | 0 | _E4 | 1 | 0 | _G4 | 0 | 0 | _I5 | 160<br>(100%)        | 0 (0%)           | 0 (0%) | 0 (0%) | 160 |
| 1 | 0 | _B3 | 0 | 0 | 0 | _E4 | 1 | 0 | _G4 | 0 | 0 | _I6 | 184<br>(100%)        | 0 (0%)           | 0 (0%) | 0 (0%) | 184 |
| 1 | 0 | _B3 | 0 | 0 | 0 | _E4 | 1 | 1 | _G3 | 0 | 0 | _I5 | 11<br>(24.444<br>%)  | 34<br>(75.556%)  | 0 (0%) | 0 (0%) | 45  |
| 1 | 0 | _B3 | 0 | 0 | 0 | _E4 | 1 | 1 | _G3 | 0 | 0 | _I6 | 4<br>(11.765<br>%)   | 30<br>(88.235%)  | 0 (0%) | 0 (0%) | 34  |
| 1 | 0 | _B3 | 0 | 0 | 0 | _E5 | 0 | . | _G3 | . | 0 | _I5 | 164<br>(100%)        | 0 (0%)           | 0 (0%) | 0 (0%) | 164 |
| 1 | 0 | _B3 | 0 | 0 | 0 | _E5 | 0 | . | _G3 | . | 0 | _I6 | 164<br>(100%)        | 0 (0%)           | 0 (0%) | 0 (0%) | 164 |
| 1 | 0 | _B3 | 0 | 0 | 0 | _E5 | 0 | . | _G3 | 0 | 0 | _I5 | 41<br>(100%)         | 0 (0%)           | 0 (0%) | 0 (0%) | 41  |
| 1 | 0 | _B3 | 0 | 0 | 0 | _E5 | 0 | . | _G3 | 0 | 0 | _I6 | 41<br>(100%)         | 0 (0%)           | 0 (0%) | 0 (0%) | 41  |
| 1 | 0 | _B3 | 0 | 0 | 0 | _E5 | 0 | . | _G4 | . | 0 | _I5 | 188<br>(100%)        | 0 (0%)           | 0 (0%) | 0 (0%) | 188 |
| 1 | 0 | _B3 | 0 | 0 | 0 | _E5 | 0 | . | _G4 | . | 0 | _I6 | 160<br>(100%)        | 0 (0%)           | 0 (0%) | 0 (0%) | 160 |
| 1 | 0 | _B3 | 0 | 0 | 0 | _E5 | 0 | . | _G4 | 0 | 0 | _I5 | 47<br>(100%)         | 0 (0%)           | 0 (0%) | 0 (0%) | 47  |
| 1 | 0 | _B3 | 0 | 0 | 0 | _E5 | 0 | . | _G4 | 0 | 0 | _I6 | 40<br>(100%)         | 0 (0%)           | 0 (0%) | 0 (0%) | 40  |
| 1 | 0 | _B3 | 0 | 0 | 0 | _E5 | 0 | 0 | _G3 | . | 0 | _I5 | 492<br>(100%)        | 0 (0%)           | 0 (0%) | 0 (0%) | 492 |
| 1 | 0 | _B3 | 0 | 0 | 0 | _E5 | 0 | 0 | _G3 | . | 0 | _I6 | 492<br>(100%)        | 0 (0%)           | 0 (0%) | 0 (0%) | 492 |

Supplemental material is neither peer-reviewed nor thoroughly edited by CJASN. The authors alone are responsible for the accuracy and presentation of the material.

|   |   |     |   |   |   |     |   |   |     |   |   |     |                      |                  |        |        |      |
|---|---|-----|---|---|---|-----|---|---|-----|---|---|-----|----------------------|------------------|--------|--------|------|
| 1 | 0 | _B3 | 0 | 0 | 0 | _E5 | 0 | 0 | _G3 | 0 | 0 | _I5 | 6871<br>(100%)       | 0 (0%)           | 0 (0%) | 0 (0%) | 6871 |
| 1 | 0 | _B3 | 0 | 0 | 0 | _E5 | 0 | 0 | _G3 | 0 | 0 | _I6 | 6893<br>(100%)       | 0 (0%)           | 0 (0%) | 0 (0%) | 6893 |
| 1 | 0 | _B3 | 0 | 0 | 0 | _E5 | 0 | 0 | _G3 | 1 | 0 | _I5 | 82<br>(100%)         | 0 (0%)           | 0 (0%) | 0 (0%) | 82   |
| 1 | 0 | _B3 | 0 | 0 | 0 | _E5 | 0 | 0 | _G3 | 1 | 0 | _I6 | 82<br>(100%)         | 0 (0%)           | 0 (0%) | 0 (0%) | 82   |
| 1 | 0 | _B3 | 0 | 0 | 0 | _E5 | 0 | 0 | _G4 | . | 0 | _I5 | 564<br>(100%)        | 0 (0%)           | 0 (0%) | 0 (0%) | 564  |
| 1 | 0 | _B3 | 0 | 0 | 0 | _E5 | 0 | 0 | _G4 | . | 0 | _I6 | 480<br>(100%)        | 0 (0%)           | 0 (0%) | 0 (0%) | 480  |
| 1 | 0 | _B3 | 0 | 0 | 0 | _E5 | 0 | 0 | _G4 | 0 | 0 | _I5 | 8629<br>(100%)       | 0 (0%)           | 0 (0%) | 0 (0%) | 8629 |
| 1 | 0 | _B3 | 0 | 0 | 0 | _E5 | 0 | 0 | _G4 | 0 | 0 | _I6 | 7345<br>(100%)       | 0 (0%)           | 0 (0%) | 0 (0%) | 7345 |
| 1 | 0 | _B3 | 0 | 0 | 0 | _E5 | 0 | 0 | _G4 | 1 | 0 | _I5 | 14<br>(14.894<br>%)  | 80<br>(85.106%)  | 0 (0%) | 0 (0%) | 94   |
| 1 | 0 | _B3 | 0 | 0 | 0 | _E5 | 0 | 0 | _G4 | 1 | 0 | _I6 | 80<br>(100%)         | 0 (0%)           | 0 (0%) | 0 (0%) | 80   |
| 1 | 0 | _B3 | 0 | 0 | 0 | _E5 | 0 | 1 | _G3 | . | 0 | _I5 | 7<br>(17.073<br>%)   | 34<br>(82.927%)  | 0 (0%) | 0 (0%) | 41   |
| 1 | 0 | _B3 | 0 | 0 | 0 | _E5 | 0 | 1 | _G3 | . | 0 | _I6 | 40<br>(97.561<br>%)  | 1<br>(2.439%)    | 0 (0%) | 0 (0%) | 41   |
| 1 | 0 | _B3 | 0 | 0 | 0 | _E5 | 0 | 1 | _G3 | 0 | 0 | _I5 | 136<br>(20.732<br>%) | 520<br>(79.268%) | 0 (0%) | 0 (0%) | 656  |
| 1 | 0 | _B3 | 0 | 0 | 0 | _E5 | 0 | 1 | _G3 | 0 | 0 | _I6 | 640<br>(100%)        | 0 (0%)           | 0 (0%) | 0 (0%) | 640  |
| 1 | 0 | _B3 | 0 | 0 | 0 | _E5 | 0 | 1 | _G4 | . | 0 | _I5 | 0 (0%)               | 47 (100%)        | 0 (0%) | 0 (0%) | 47   |
| 1 | 0 | _B3 | 0 | 0 | 0 | _E5 | 0 | 1 | _G4 | . | 0 | _I6 | 0 (0%)               | 40 (100%)        | 0 (0%) | 0 (0%) | 40   |
| 1 | 0 | _B3 | 0 | 0 | 0 | _E5 | 1 | 0 | _G3 | 0 | 0 | _I5 | 123<br>(100%)        | 0 (0%)           | 0 (0%) | 0 (0%) | 123  |
| 1 | 0 | _B3 | 0 | 0 | 0 | _E5 | 1 | 0 | _G3 | 0 | 0 | _I6 | 124<br>(100%)        | 0 (0%)           | 0 (0%) | 0 (0%) | 124  |
| 1 | 0 | _B3 | 0 | 0 | 0 | _E5 | 1 | 0 | _G4 | 0 | 0 | _I5 | 188<br>(100%)        | 0 (0%)           | 0 (0%) | 0 (0%) | 188  |
| 1 | 0 | _B3 | 0 | 0 | 0 | _E5 | 1 | 0 | _G4 | 0 | 0 | _I6 | 160<br>(100%)        | 0 (0%)           | 0 (0%) | 0 (0%) | 160  |

|   |   |     |   |   |   |     |   |   |     |   |   |     |                    |                 |        |        |     |
|---|---|-----|---|---|---|-----|---|---|-----|---|---|-----|--------------------|-----------------|--------|--------|-----|
| 1 | 0 | _B3 | 0 | 0 | 0 | _E5 | 1 | 1 | _G3 | 0 | 0 | _I5 | 9<br>(21.951<br>%) | 32<br>(78.049%) | 0 (0%) | 0 (0%) | 41  |
| 1 | 0 | _B3 | 0 | 0 | 0 | _E5 | 1 | 1 | _G3 | 0 | 0 | _I6 | 9<br>(22.5%)       | 31<br>(77.5%)   | 0 (0%) | 0 (0%) | 40  |
| 1 | 0 | _B3 | 0 | 0 | 1 | _E3 | 0 | 0 | _G3 | . | 0 | _I5 | 82<br>(100%)       | 0 (0%)          | 0 (0%) | 0 (0%) | 82  |
| 1 | 0 | _B3 | 0 | 0 | 1 | _E3 | 0 | 0 | _G3 | . | 0 | _I6 | 78<br>(100%)       | 0 (0%)          | 0 (0%) | 0 (0%) | 78  |
| 1 | 0 | _B3 | 0 | 0 | 1 | _E3 | 0 | 0 | _G3 | 0 | 0 | _I5 | 369<br>(100%)      | 0 (0%)          | 0 (0%) | 0 (0%) | 369 |
| 1 | 0 | _B3 | 0 | 0 | 1 | _E3 | 0 | 0 | _G3 | 0 | 0 | _I6 | 351<br>(100%)      | 0 (0%)          | 0 (0%) | 0 (0%) | 351 |
| 1 | 0 | _B3 | 0 | 0 | 1 | _E3 | 0 | 0 | _G4 | . | 0 | _I5 | 0 (0%)             | 88 (100%)       | 0 (0%) | 0 (0%) | 88  |
| 1 | 0 | _B3 | 0 | 0 | 1 | _E3 | 0 | 0 | _G4 | . | 0 | _I6 | 84<br>(100%)       | 0 (0%)          | 0 (0%) | 0 (0%) | 84  |
| 1 | 0 | _B3 | 0 | 0 | 1 | _E3 | 0 | 0 | _G4 | 0 | 0 | _I5 | 0 (0%)             | 748<br>(100%)   | 0 (0%) | 0 (0%) | 748 |
| 1 | 0 | _B3 | 0 | 0 | 1 | _E3 | 0 | 0 | _G4 | 0 | 0 | _I6 | 714<br>(100%)      | 0 (0%)          | 0 (0%) | 0 (0%) | 714 |
| 1 | 0 | _B3 | 0 | 0 | 1 | _E3 | 0 | 1 | _G3 | 0 | 0 | _I5 | 0 (0%)             | 328<br>(100%)   | 0 (0%) | 0 (0%) | 328 |
| 1 | 0 | _B3 | 0 | 0 | 1 | _E3 | 0 | 1 | _G3 | 0 | 0 | _I6 | 0 (0%)             | 312<br>(100%)   | 0 (0%) | 0 (0%) | 312 |
| 1 | 0 | _B3 | 0 | 0 | 1 | _E3 | 1 | 0 | _G4 | . | 0 | _I5 | 0 (0%)             | 44 (100%)       | 0 (0%) | 0 (0%) | 44  |
| 1 | 0 | _B3 | 0 | 0 | 1 | _E3 | 1 | 0 | _G4 | . | 0 | _I6 | 42<br>(100%)       | 0 (0%)          | 0 (0%) | 0 (0%) | 42  |
| 1 | 0 | _B3 | 0 | 0 | 1 | _E3 | 1 | 1 | _G3 | . | 0 | _I5 | 0 (0%)             | 41 (100%)       | 0 (0%) | 0 (0%) | 41  |
| 1 | 0 | _B3 | 0 | 0 | 1 | _E3 | 1 | 1 | _G3 | . | 0 | _I6 | 0 (0%)             | 39 (100%)       | 0 (0%) | 0 (0%) | 39  |
| 1 | 0 | _B3 | 0 | 0 | 1 | _E4 | 0 | 0 | _G3 | . | 0 | _I5 | 45<br>(100%)       | 0 (0%)          | 0 (0%) | 0 (0%) | 45  |
| 1 | 0 | _B3 | 0 | 0 | 1 | _E4 | 0 | 0 | _G3 | . | 0 | _I6 | 34<br>(100%)       | 0 (0%)          | 0 (0%) | 0 (0%) | 34  |
| 1 | 0 | _B3 | 0 | 0 | 1 | _E4 | 0 | 0 | _G3 | 0 | 0 | _I5 | 99<br>(100%)       | 0 (0%)          | 0 (0%) | 0 (0%) | 99  |
| 1 | 0 | _B3 | 0 | 0 | 1 | _E4 | 0 | 0 | _G3 | 0 | 0 | _I6 | 83<br>(100%)       | 0 (0%)          | 0 (0%) | 0 (0%) | 83  |
| 1 | 0 | _B3 | 0 | 0 | 1 | _E4 | 0 | 0 | _G4 | . | 0 | _I5 | 40<br>(100%)       | 0 (0%)          | 0 (0%) | 0 (0%) | 40  |

|   |   |     |   |   |   |     |   |   |     |   |   |     |                     |                 |                 |               |     |
|---|---|-----|---|---|---|-----|---|---|-----|---|---|-----|---------------------|-----------------|-----------------|---------------|-----|
| 1 | 0 | _B3 | 0 | 0 | 1 | _E4 | 0 | 0 | _G4 | . | 0 | _I6 | 46<br>(100%)        | 0 (0%)          | 0 (0%)          | 0 (0%)        | 46  |
| 1 | 0 | _B3 | 0 | 0 | 1 | _E4 | 0 | 0 | _G4 | 0 | 0 | _I5 | 92<br>(100%)        | 0 (0%)          | 0 (0%)          | 0 (0%)        | 92  |
| 1 | 0 | _B3 | 0 | 0 | 1 | _E4 | 0 | 0 | _G4 | 0 | 0 | _I6 | 103<br>(100%)       | 0 (0%)          | 0 (0%)          | 0 (0%)        | 103 |
| 1 | 0 | _B3 | 0 | 0 | 1 | _E4 | 1 | 0 | _G4 | . | 0 | _I5 | 7<br>(17.5%)        | 33<br>(82.5%)   | 0 (0%)          | 0 (0%)        | 40  |
| 1 | 0 | _B3 | 0 | 0 | 1 | _E4 | 1 | 0 | _G4 | . | 0 | _I6 | 3<br>(6.522%<br>)   | 43<br>(93.478%) | 0 (0%)          | 0 (0%)        | 46  |
| 1 | 0 | _B3 | 0 | 0 | 1 | _E4 | 1 | 1 | _G3 | . | 0 | _I5 | 0 (0%)              | 2<br>(4.444%)   | 39<br>(86.667%) | 4<br>(8.889%) | 45  |
| 1 | 0 | _B3 | 0 | 0 | 1 | _E4 | 1 | 1 | _G3 | . | 0 | _I6 | 0 (0%)              | 34 (100%)       | 0 (0%)          | 0 (0%)        | 34  |
| 1 | 0 | _B3 | 0 | 0 | 1 | _E5 | 0 | 0 | _G3 | . | 0 | _I5 | 41<br>(100%)        | 0 (0%)          | 0 (0%)          | 0 (0%)        | 41  |
| 1 | 0 | _B3 | 0 | 0 | 1 | _E5 | 0 | 0 | _G3 | . | 0 | _I6 | 41<br>(100%)        | 0 (0%)          | 0 (0%)          | 0 (0%)        | 41  |
| 1 | 0 | _B3 | 0 | 0 | 1 | _E5 | 0 | 0 | _G3 | 0 | 0 | _I5 | 99<br>(100%)        | 0 (0%)          | 0 (0%)          | 0 (0%)        | 99  |
| 1 | 0 | _B3 | 0 | 0 | 1 | _E5 | 0 | 0 | _G3 | 0 | 0 | _I6 | 93<br>(100%)        | 0 (0%)          | 0 (0%)          | 0 (0%)        | 93  |
| 1 | 0 | _B3 | 0 | 0 | 1 | _E5 | 0 | 0 | _G4 | . | 0 | _I5 | 47<br>(100%)        | 0 (0%)          | 0 (0%)          | 0 (0%)        | 47  |
| 1 | 0 | _B3 | 0 | 0 | 1 | _E5 | 0 | 0 | _G4 | . | 0 | _I6 | 40<br>(100%)        | 0 (0%)          | 0 (0%)          | 0 (0%)        | 40  |
| 1 | 0 | _B3 | 0 | 0 | 1 | _E5 | 0 | 0 | _G4 | 0 | 0 | _I5 | 113<br>(100%)       | 0 (0%)          | 0 (0%)          | 0 (0%)        | 113 |
| 1 | 0 | _B3 | 0 | 0 | 1 | _E5 | 0 | 0 | _G4 | 0 | 0 | _I6 | 95<br>(100%)        | 0 (0%)          | 0 (0%)          | 0 (0%)        | 95  |
| 1 | 0 | _B3 | 0 | 0 | 1 | _E5 | 1 | 0 | _G3 | . | 0 | _I6 | 0 (0%)              | 1 (100%)        | 0 (0%)          | 0 (0%)        | 1   |
| 1 | 0 | _B3 | 0 | 0 | 1 | _E5 | 1 | 0 | _G4 | . | 0 | _I5 | 21<br>(44.681<br>%) | 26<br>(55.319%) | 0 (0%)          | 0 (0%)        | 47  |
| 1 | 0 | _B3 | 0 | 0 | 1 | _E5 | 1 | 0 | _G4 | . | 0 | _I6 | 3 (7.5%)            | 37<br>(92.5%)   | 0 (0%)          | 0 (0%)        | 40  |
| 1 | 0 | _B3 | 0 | 0 | 1 | _E5 | 1 | 1 | _G3 | . | 0 | _I5 | 0 (0%)              | 1<br>(2.439%)   | 36<br>(87.805%) | 4<br>(9.756%) | 41  |
| 1 | 0 | _B3 | 0 | 0 | 1 | _E5 | 1 | 1 | _G3 | . | 0 | _I6 | 0 (0%)              | 40 (100%)       | 0 (0%)          | 0 (0%)        | 40  |
| 1 | 0 | _B3 | 0 | 1 | 0 | _E4 | 0 | 0 | _G3 | 0 | 0 | _I5 | 45<br>(100%)        | 0 (0%)          | 0 (0%)          | 0 (0%)        | 45  |

|   |   |     |   |   |   |     |   |   |     |   |   |     |              |           |        |        |    |
|---|---|-----|---|---|---|-----|---|---|-----|---|---|-----|--------------|-----------|--------|--------|----|
| 1 | 0 | _B3 | 0 | 1 | 0 | _E4 | 0 | 0 | _G3 | 0 | 0 | _I6 | 34<br>(100%) | 0 (0%)    | 0 (0%) | 0 (0%) | 34 |
| 1 | 0 | _B3 | 0 | 1 | 0 | _E4 | 0 | 0 | _G4 | 0 | 0 | _I5 | 40<br>(100%) | 0 (0%)    | 0 (0%) | 0 (0%) | 40 |
| 1 | 0 | _B3 | 0 | 1 | 0 | _E4 | 0 | 0 | _G4 | 0 | 0 | _I6 | 46<br>(100%) | 0 (0%)    | 0 (0%) | 0 (0%) | 46 |
| 1 | 0 | _B3 | 0 | 1 | 0 | _E5 | 0 | 0 | _G3 | 0 | 0 | _I5 | 41<br>(100%) | 0 (0%)    | 0 (0%) | 0 (0%) | 41 |
| 1 | 0 | _B3 | 0 | 1 | 0 | _E5 | 0 | 0 | _G3 | 0 | 0 | _I6 | 41<br>(100%) | 0 (0%)    | 0 (0%) | 0 (0%) | 41 |
| 1 | 0 | _B3 | 0 | 1 | 0 | _E5 | 0 | 0 | _G4 | 0 | 0 | _I5 | 47<br>(100%) | 0 (0%)    | 0 (0%) | 0 (0%) | 47 |
| 1 | 0 | _B3 | 0 | 1 | 0 | _E5 | 0 | 0 | _G4 | 0 | 0 | _I6 | 40<br>(100%) | 0 (0%)    | 0 (0%) | 0 (0%) | 40 |
| 1 | 0 | _B3 | 0 | 1 | 1 | _E3 | 0 | 0 | _G3 | 0 | 0 | _I5 | 41<br>(100%) | 0 (0%)    | 0 (0%) | 0 (0%) | 41 |
| 1 | 0 | _B3 | 0 | 1 | 1 | _E3 | 0 | 0 | _G3 | 0 | 0 | _I6 | 39<br>(100%) | 0 (0%)    | 0 (0%) | 0 (0%) | 39 |
| 1 | 0 | _B3 | 0 | 1 | 1 | _E3 | 0 | 0 | _G4 | 0 | 0 | _I5 | 0 (0%)       | 44 (100%) | 0 (0%) | 0 (0%) | 44 |
| 1 | 0 | _B3 | 0 | 1 | 1 | _E3 | 0 | 0 | _G4 | 0 | 0 | _I6 | 0 (0%)       | 42 (100%) | 0 (0%) | 0 (0%) | 42 |
| 1 | 0 | _B3 | 1 | . | 0 | _E3 | 0 | 0 | _G3 | 0 | 0 | _I5 | 41<br>(100%) | 0 (0%)    | 0 (0%) | 0 (0%) | 41 |
| 1 | 0 | _B3 | 1 | . | 0 | _E3 | 0 | 0 | _G3 | 0 | 0 | _I6 | 39<br>(100%) | 0 (0%)    | 0 (0%) | 0 (0%) | 39 |
| 1 | 0 | _B3 | 1 | . | 0 | _E3 | 0 | 0 | _G4 | 0 | 0 | _I5 | 0 (0%)       | 44 (100%) | 0 (0%) | 0 (0%) | 44 |
| 1 | 0 | _B3 | 1 | . | 0 | _E3 | 0 | 0 | _G4 | 0 | 0 | _I6 | 42<br>(100%) | 0 (0%)    | 0 (0%) | 0 (0%) | 42 |
| 1 | 0 | _B3 | 1 | . | 0 | _E4 | 0 | 0 | _G3 | 0 | 0 | _I5 | 45<br>(100%) | 0 (0%)    | 0 (0%) | 0 (0%) | 45 |
| 1 | 0 | _B3 | 1 | . | 0 | _E4 | 0 | 0 | _G3 | 0 | 0 | _I6 | 34<br>(100%) | 0 (0%)    | 0 (0%) | 0 (0%) | 34 |
| 1 | 0 | _B3 | 1 | . | 0 | _E4 | 0 | 0 | _G4 | 0 | 0 | _I5 | 40<br>(100%) | 0 (0%)    | 0 (0%) | 0 (0%) | 40 |
| 1 | 0 | _B3 | 1 | . | 0 | _E4 | 0 | 0 | _G4 | 0 | 0 | _I6 | 46<br>(100%) | 0 (0%)    | 0 (0%) | 0 (0%) | 46 |
| 1 | 0 | _B3 | 1 | . | 0 | _E5 | 0 | 0 | _G3 | 0 | 0 | _I5 | 41<br>(100%) | 0 (0%)    | 0 (0%) | 0 (0%) | 41 |
| 1 | 0 | _B3 | 1 | . | 0 | _E5 | 0 | 0 | _G3 | 0 | 0 | _I6 | 41<br>(100%) | 0 (0%)    | 0 (0%) | 0 (0%) | 41 |

Supplemental material is neither peer-reviewed nor thoroughly edited by CJASN. The authors alone are responsible for the accuracy and presentation of the material.

|   |   |     |   |   |   |     |   |   |     |   |   |     |              |               |           |        |    |
|---|---|-----|---|---|---|-----|---|---|-----|---|---|-----|--------------|---------------|-----------|--------|----|
| 1 | 0 | _B3 | 1 | . | 0 | _E5 | 0 | 0 | _G4 | 0 | 0 | _I5 | 47<br>(100%) | 0 (0%)        | 0 (0%)    | 0 (0%) | 47 |
| 1 | 0 | _B3 | 1 | . | 0 | _E5 | 0 | 0 | _G4 | 0 | 0 | _I6 | 40<br>(100%) | 0 (0%)        | 0 (0%)    | 0 (0%) | 40 |
| 1 | 0 | _B3 | 1 | 0 | 0 | _E3 | 0 | 0 | _G3 | 0 | 0 | _I5 | 41<br>(100%) | 0 (0%)        | 0 (0%)    | 0 (0%) | 41 |
| 1 | 0 | _B3 | 1 | 0 | 0 | _E3 | 0 | 0 | _G3 | 0 | 0 | _I6 | 39<br>(100%) | 0 (0%)        | 0 (0%)    | 0 (0%) | 39 |
| 1 | 0 | _B3 | 1 | 0 | 0 | _E3 | 0 | 0 | _G3 | 1 | 0 | _I5 | 0 (0%)       | 41 (100%)     | 0 (0%)    | 0 (0%) | 41 |
| 1 | 0 | _B3 | 1 | 0 | 0 | _E3 | 0 | 0 | _G3 | 1 | 1 | _I6 | 0 (0%)       | 0 (0%)        | 39 (100%) | 0 (0%) | 39 |
| 1 | 0 | _B3 | 1 | 0 | 0 | _E3 | 0 | 0 | _G4 | 0 | 0 | _I5 | 0 (0%)       | 44 (100%)     | 0 (0%)    | 0 (0%) | 44 |
| 1 | 0 | _B3 | 1 | 0 | 0 | _E3 | 0 | 0 | _G4 | 0 | 0 | _I6 | 42<br>(100%) | 0 (0%)        | 0 (0%)    | 0 (0%) | 42 |
| 1 | 0 | _B3 | 1 | 0 | 0 | _E3 | 0 | 0 | _G4 | 1 | 0 | _I5 | 0 (0%)       | 44 (100%)     | 0 (0%)    | 0 (0%) | 44 |
| 1 | 0 | _B3 | 1 | 0 | 0 | _E3 | 0 | 0 | _G4 | 1 | 1 | _I6 | 0 (0%)       | 0 (0%)        | 42 (100%) | 0 (0%) | 42 |
| 1 | 0 | _B3 | 1 | 0 | 0 | _E3 | 1 | 0 | _G3 | 1 | 0 | _I5 | 0 (0%)       | 41 (100%)     | 0 (0%)    | 0 (0%) | 41 |
| 1 | 0 | _B3 | 1 | 0 | 0 | _E3 | 1 | 0 | _G3 | 1 | 1 | _I6 | 0 (0%)       | 0 (0%)        | 39 (100%) | 0 (0%) | 39 |
| 1 | 0 | _B3 | 1 | 0 | 0 | _E3 | 1 | 0 | _G4 | 1 | 0 | _I5 | 0 (0%)       | 88 (100%)     | 0 (0%)    | 0 (0%) | 88 |
| 1 | 0 | _B3 | 1 | 0 | 0 | _E3 | 1 | 0 | _G4 | 1 | 1 | _I6 | 0 (0%)       | 0 (0%)        | 84 (100%) | 0 (0%) | 84 |
| 1 | 0 | _B3 | 1 | 0 | 0 | _E3 | 1 | 1 | _G3 | 1 | 0 | _I5 | 0 (0%)       | 41 (100%)     | 0 (0%)    | 0 (0%) | 41 |
| 1 | 0 | _B3 | 1 | 0 | 0 | _E3 | 1 | 1 | _G3 | 1 | 1 | _I6 | 0 (0%)       | 0 (0%)        | 39 (100%) | 0 (0%) | 39 |
| 1 | 0 | _B3 | 1 | 0 | 0 | _E4 | 0 | 0 | _G3 | 0 | 0 | _I5 | 45<br>(100%) | 0 (0%)        | 0 (0%)    | 0 (0%) | 45 |
| 1 | 0 | _B3 | 1 | 0 | 0 | _E4 | 0 | 0 | _G3 | 0 | 0 | _I6 | 34<br>(100%) | 0 (0%)        | 0 (0%)    | 0 (0%) | 34 |
| 1 | 0 | _B3 | 1 | 0 | 0 | _E4 | 0 | 0 | _G3 | 1 | 0 | _I5 | 90<br>(100%) | 0 (0%)        | 0 (0%)    | 0 (0%) | 90 |
| 1 | 0 | _B3 | 1 | 0 | 0 | _E4 | 0 | 0 | _G3 | 1 | 1 | _I6 | 0 (0%)       | 0 (0%)        | 68 (100%) | 0 (0%) | 68 |
| 1 | 0 | _B3 | 1 | 0 | 0 | _E4 | 0 | 0 | _G4 | 0 | 0 | _I5 | 1 (2.5%)     | 39<br>(97.5%) | 0 (0%)    | 0 (0%) | 40 |

|   |   |     |   |   |   |     |   |   |     |   |   |     |               |                 |               |                 |     |
|---|---|-----|---|---|---|-----|---|---|-----|---|---|-----|---------------|-----------------|---------------|-----------------|-----|
| 1 | 0 | _B3 | 1 | 0 | 0 | _E4 | 0 | 0 | _G4 | 0 | 0 | _I6 | 46<br>(100%)  | 0 (0%)          | 0 (0%)        | 0 (0%)          | 46  |
| 1 | 0 | _B3 | 1 | 0 | 0 | _E4 | 0 | 0 | _G4 | 1 | 0 | _I5 | 0 (0%)        | 120<br>(100%)   | 0 (0%)        | 0 (0%)          | 120 |
| 1 | 0 | _B3 | 1 | 0 | 0 | _E4 | 0 | 0 | _G4 | 1 | 1 | _I6 | 0 (0%)        | 0 (0%)          | 138<br>(100%) | 0 (0%)          | 138 |
| 1 | 0 | _B3 | 1 | 0 | 0 | _E4 | 0 | 1 | _G3 | 1 | 0 | _I5 | 0 (0%)        | 45 (100%)       | 0 (0%)        | 0 (0%)          | 45  |
| 1 | 0 | _B3 | 1 | 0 | 0 | _E4 | 0 | 1 | _G3 | 1 | 1 | _I6 | 0 (0%)        | 0 (0%)          | 34 (100%)     | 0 (0%)          | 34  |
| 1 | 0 | _B3 | 1 | 0 | 0 | _E4 | 1 | 0 | _G3 | 1 | 0 | _I5 | 45<br>(100%)  | 0 (0%)          | 0 (0%)        | 0 (0%)          | 45  |
| 1 | 0 | _B3 | 1 | 0 | 0 | _E4 | 1 | 0 | _G3 | 1 | 1 | _I6 | 0 (0%)        | 0 (0%)          | 34 (100%)     | 0 (0%)          | 34  |
| 1 | 0 | _B3 | 1 | 0 | 0 | _E4 | 1 | 0 | _G4 | 1 | 0 | _I5 | 0 (0%)        | 80 (100%)       | 0 (0%)        | 0 (0%)          | 80  |
| 1 | 0 | _B3 | 1 | 0 | 0 | _E4 | 1 | 0 | _G4 | 1 | 1 | _I6 | 0 (0%)        | 0 (0%)          | 92 (100%)     | 0 (0%)          | 92  |
| 1 | 0 | _B3 | 1 | 0 | 0 | _E4 | 1 | 1 | _G3 | 1 | 0 | _I5 | 0 (0%)        | 34<br>(75.556%) | 0 (0%)        | 11<br>(24.444%) | 45  |
| 1 | 0 | _B3 | 1 | 0 | 0 | _E4 | 1 | 1 | _G3 | 1 | 1 | _I6 | 0 (0%)        | 0 (0%)          | 34 (100%)     | 0 (0%)          | 34  |
| 1 | 0 | _B3 | 1 | 0 | 0 | _E5 | 0 | 0 | _G3 | 0 | 0 | _I5 | 41<br>(100%)  | 0 (0%)          | 0 (0%)        | 0 (0%)          | 41  |
| 1 | 0 | _B3 | 1 | 0 | 0 | _E5 | 0 | 0 | _G3 | 0 | 0 | _I6 | 41<br>(100%)  | 0 (0%)          | 0 (0%)        | 0 (0%)          | 41  |
| 1 | 0 | _B3 | 1 | 0 | 0 | _E5 | 0 | 0 | _G3 | 1 | 0 | _I5 | 82<br>(100%)  | 0 (0%)          | 0 (0%)        | 0 (0%)          | 82  |
| 1 | 0 | _B3 | 1 | 0 | 0 | _E5 | 0 | 0 | _G3 | 1 | 1 | _I6 | 0 (0%)        | 0 (0%)          | 83 (100%)     | 0 (0%)          | 83  |
| 1 | 0 | _B3 | 1 | 0 | 0 | _E5 | 0 | 0 | _G4 | 0 | 0 | _I5 | 3<br>(6.383%) | 44<br>(93.617%) | 0 (0%)        | 0 (0%)          | 47  |
| 1 | 0 | _B3 | 1 | 0 | 0 | _E5 | 0 | 0 | _G4 | 0 | 0 | _I6 | 40<br>(100%)  | 0 (0%)          | 0 (0%)        | 0 (0%)          | 40  |
| 1 | 0 | _B3 | 1 | 0 | 0 | _E5 | 0 | 0 | _G4 | 1 | 0 | _I5 | 0 (0%)        | 141<br>(100%)   | 0 (0%)        | 0 (0%)          | 141 |
| 1 | 0 | _B3 | 1 | 0 | 0 | _E5 | 0 | 0 | _G4 | 1 | 1 | _I6 | 0 (0%)        | 0 (0%)          | 120<br>(100%) | 0 (0%)          | 120 |
| 1 | 0 | _B3 | 1 | 0 | 0 | _E5 | 0 | 1 | _G3 | 1 | 0 | _I5 | 0 (0%)        | 41 (100%)       | 0 (0%)        | 0 (0%)          | 41  |
| 1 | 0 | _B3 | 1 | 0 | 0 | _E5 | 0 | 1 | _G3 | 1 | 1 | _I6 | 0 (0%)        | 0 (0%)          | 40 (100%)     | 0 (0%)          | 40  |

Supplemental material is neither peer-reviewed nor thoroughly edited by CJASN. The authors alone are responsible for the accuracy and presentation of the material.

|   |   |     |   |   |   |     |   |   |     |   |   |     |                |                 |           |                 |      |
|---|---|-----|---|---|---|-----|---|---|-----|---|---|-----|----------------|-----------------|-----------|-----------------|------|
| 1 | 0 | _B3 | 1 | 0 | 0 | _E5 | 1 | 0 | _G3 | 1 | 0 | _I5 | 41<br>(100%)   | 0 (0%)          | 0 (0%)    | 0 (0%)          | 41   |
| 1 | 0 | _B3 | 1 | 0 | 0 | _E5 | 1 | 0 | _G3 | 1 | 1 | _I6 | 0 (0%)         | 0 (0%)          | 42 (100%) | 0 (0%)          | 42   |
| 1 | 0 | _B3 | 1 | 0 | 0 | _E5 | 1 | 0 | _G4 | 1 | 0 | _I5 | 0 (0%)         | 94 (100%)       | 0 (0%)    | 0 (0%)          | 94   |
| 1 | 0 | _B3 | 1 | 0 | 0 | _E5 | 1 | 0 | _G4 | 1 | 1 | _I6 | 0 (0%)         | 0 (0%)          | 80 (100%) | 0 (0%)          | 80   |
| 1 | 0 | _B3 | 1 | 0 | 0 | _E5 | 1 | 1 | _G3 | 1 | 0 | _I5 | 0 (0%)         | 29<br>(70.732%) | 0 (0%)    | 12<br>(29.268%) | 41   |
| 1 | 0 | _B3 | 1 | 0 | 0 | _E5 | 1 | 1 | _G3 | 1 | 1 | _I6 | 0 (0%)         | 0 (0%)          | 40 (100%) | 0 (0%)          | 40   |
| 1 | 0 | _B3 | 1 | 0 | 1 | _E3 | 0 | 0 | _G3 | 1 | 0 | _I5 | 0 (0%)         | 41 (100%)       | 0 (0%)    | 0 (0%)          | 41   |
| 1 | 0 | _B3 | 1 | 0 | 1 | _E3 | 0 | 0 | _G3 | 1 | 1 | _I6 | 0 (0%)         | 0 (0%)          | 39 (100%) | 0 (0%)          | 39   |
| 1 | 0 | _B3 | 1 | 0 | 1 | _E3 | 0 | 0 | _G4 | 1 | 0 | _I5 | 0 (0%)         | 88 (100%)       | 0 (0%)    | 0 (0%)          | 88   |
| 1 | 0 | _B3 | 1 | 0 | 1 | _E3 | 0 | 0 | _G4 | 1 | 1 | _I6 | 0 (0%)         | 0 (0%)          | 84 (100%) | 0 (0%)          | 84   |
| 1 | 0 | _B3 | 1 | 0 | 1 | _E3 | 0 | 1 | _G3 | 1 | 0 | _I5 | 0 (0%)         | 41 (100%)       | 0 (0%)    | 0 (0%)          | 41   |
| 1 | 0 | _B3 | 1 | 0 | 1 | _E3 | 0 | 1 | _G3 | 1 | 1 | _I6 | 0 (0%)         | 0 (0%)          | 39 (100%) | 0 (0%)          | 39   |
| 1 | 0 | _B5 | 0 | . | 0 | _E3 | 0 | 0 | _G3 | 0 | 0 | _I5 | 1221<br>(100%) | 0 (0%)          | 0 (0%)    | 0 (0%)          | 1221 |
| 1 | 0 | _B5 | 0 | . | 0 | _E3 | 0 | 0 | _G3 | 0 | 0 | _I6 | 1386<br>(100%) | 0 (0%)          | 0 (0%)    | 0 (0%)          | 1386 |
| 1 | 0 | _B5 | 0 | . | 0 | _E3 | 0 | 0 | _G4 | . | 0 | _I5 | 84<br>(100%)   | 0 (0%)          | 0 (0%)    | 0 (0%)          | 84   |
| 1 | 0 | _B5 | 0 | . | 0 | _E3 | 0 | 0 | _G4 | . | 0 | _I6 | 84<br>(100%)   | 0 (0%)          | 0 (0%)    | 0 (0%)          | 84   |
| 1 | 0 | _B5 | 0 | . | 0 | _E3 | 0 | 0 | _G4 | 0 | 0 | _I5 | 1554<br>(100%) | 0 (0%)          | 0 (0%)    | 0 (0%)          | 1554 |
| 1 | 0 | _B5 | 0 | . | 0 | _E3 | 0 | 0 | _G4 | 0 | 0 | _I6 | 1554<br>(100%) | 0 (0%)          | 0 (0%)    | 0 (0%)          | 1554 |
| 1 | 0 | _B5 | 0 | . | 0 | _E3 | 0 | 0 | _G4 | 1 | 0 | _I5 | 0 (0%)         | 42 (100%)       | 0 (0%)    | 0 (0%)          | 42   |
| 1 | 0 | _B5 | 0 | . | 0 | _E3 | 0 | 0 | _G4 | 1 | 1 | _I6 | 0 (0%)         | 0 (0%)          | 42 (100%) | 0 (0%)          | 42   |
| 1 | 0 | _B5 | 0 | . | 0 | _E3 | 0 | 1 | _G3 | . | 0 | _I5 | 0 (0%)         | 148<br>(100%)   | 0 (0%)    | 0 (0%)          | 148  |

|   |   |     |   |   |   |     |   |   |     |   |   |     |                |               |           |        |      |
|---|---|-----|---|---|---|-----|---|---|-----|---|---|-----|----------------|---------------|-----------|--------|------|
| 1 | 0 | _B5 | 0 | . | 0 | _E3 | 0 | 1 | _G3 | . | 0 | _I6 | 42<br>(25%)    | 126 (75%)     | 0 (0%)    | 0 (0%) | 168  |
| 1 | 0 | _B5 | 0 | . | 0 | _E3 | 0 | 1 | _G3 | 0 | 0 | _I5 | 0 (0%)         | 148<br>(100%) | 0 (0%)    | 0 (0%) | 148  |
| 1 | 0 | _B5 | 0 | . | 0 | _E3 | 0 | 1 | _G3 | 0 | 0 | _I6 | 84<br>(50%)    | 84 (50%)      | 0 (0%)    | 0 (0%) | 168  |
| 1 | 0 | _B5 | 0 | . | 0 | _E3 | 0 | 1 | _G3 | 1 | 0 | _I5 | 0 (0%)         | 74 (100%)     | 0 (0%)    | 0 (0%) | 74   |
| 1 | 0 | _B5 | 0 | . | 0 | _E3 | 0 | 1 | _G3 | 1 | 0 | _I6 | 0 (0%)         | 42 (100%)     | 0 (0%)    | 0 (0%) | 42   |
| 1 | 0 | _B5 | 0 | . | 0 | _E3 | 0 | 1 | _G3 | 1 | 1 | _I6 | 0 (0%)         | 0 (0%)        | 42 (100%) | 0 (0%) | 42   |
| 1 | 0 | _B5 | 0 | . | 0 | _E3 | 0 | 1 | _G4 | . | 0 | _I5 | 0 (0%)         | 84 (100%)     | 0 (0%)    | 0 (0%) | 84   |
| 1 | 0 | _B5 | 0 | . | 0 | _E3 | 0 | 1 | _G4 | . | 0 | _I6 | 0 (0%)         | 84 (100%)     | 0 (0%)    | 0 (0%) | 84   |
| 1 | 0 | _B5 | 0 | . | 0 | _E3 | 0 | 1 | _G4 | 1 | 0 | _I5 | 0 (0%)         | 42 (100%)     | 0 (0%)    | 0 (0%) | 42   |
| 1 | 0 | _B5 | 0 | . | 0 | _E3 | 0 | 1 | _G4 | 1 | 0 | _I6 | 0 (0%)         | 42 (100%)     | 0 (0%)    | 0 (0%) | 42   |
| 1 | 0 | _B5 | 0 | . | 0 | _E4 | 0 | . | _G3 | . | 0 | _I5 | 45<br>(100%)   | 0 (0%)        | 0 (0%)    | 0 (0%) | 45   |
| 1 | 0 | _B5 | 0 | . | 0 | _E4 | 0 | . | _G3 | . | 0 | _I6 | 38<br>(100%)   | 0 (0%)        | 0 (0%)    | 0 (0%) | 38   |
| 1 | 0 | _B5 | 0 | . | 0 | _E4 | 0 | . | _G4 | . | 0 | _I5 | 36<br>(100%)   | 0 (0%)        | 0 (0%)    | 0 (0%) | 36   |
| 1 | 0 | _B5 | 0 | . | 0 | _E4 | 0 | . | _G4 | . | 0 | _I6 | 47<br>(100%)   | 0 (0%)        | 0 (0%)    | 0 (0%) | 47   |
| 1 | 0 | _B5 | 0 | . | 0 | _E4 | 0 | 0 | _G3 | 0 | 0 | _I5 | 1485<br>(100%) | 0 (0%)        | 0 (0%)    | 0 (0%) | 1485 |
| 1 | 0 | _B5 | 0 | . | 0 | _E4 | 0 | 0 | _G3 | 0 | 0 | _I6 | 1254<br>(100%) | 0 (0%)        | 0 (0%)    | 0 (0%) | 1254 |
| 1 | 0 | _B5 | 0 | . | 0 | _E4 | 0 | 0 | _G4 | . | 0 | _I5 | 72<br>(100%)   | 0 (0%)        | 0 (0%)    | 0 (0%) | 72   |
| 1 | 0 | _B5 | 0 | . | 0 | _E4 | 0 | 0 | _G4 | . | 0 | _I6 | 94<br>(100%)   | 0 (0%)        | 0 (0%)    | 0 (0%) | 94   |
| 1 | 0 | _B5 | 0 | . | 0 | _E4 | 0 | 0 | _G4 | 0 | 0 | _I5 | 1512<br>(100%) | 0 (0%)        | 0 (0%)    | 0 (0%) | 1512 |
| 1 | 0 | _B5 | 0 | . | 0 | _E4 | 0 | 0 | _G4 | 0 | 0 | _I6 | 1974<br>(100%) | 0 (0%)        | 0 (0%)    | 0 (0%) | 1974 |
| 1 | 0 | _B5 | 0 | . | 0 | _E4 | 0 | 0 | _G4 | 1 | 0 | _I5 | 0 (0%)         | 36 (100%)     | 0 (0%)    | 0 (0%) | 36   |

|   |   |     |   |   |   |     |   |   |     |   |   |     |                  |                  |                |        |     |
|---|---|-----|---|---|---|-----|---|---|-----|---|---|-----|------------------|------------------|----------------|--------|-----|
| 1 | 0 | _B5 | 0 | . | 0 | _E4 | 0 | 0 | _G4 | 1 | 1 | _I6 | 0 (0%)           | 0 (0%)           | 47 (100%)      | 0 (0%) | 47  |
| 1 | 0 | _B5 | 0 | . | 0 | _E4 | 0 | 1 | _G3 | . | 0 | _I5 | 2<br>(0.889%)    | 223<br>(99.111%) | 0 (0%)         | 0 (0%) | 225 |
| 1 | 0 | _B5 | 0 | . | 0 | _E4 | 0 | 1 | _G3 | . | 0 | _I6 | 6<br>(3.158%)    | 184<br>(96.842%) | 0 (0%)         | 0 (0%) | 190 |
| 1 | 0 | _B5 | 0 | . | 0 | _E4 | 0 | 1 | _G3 | 0 | 0 | _I5 | 78<br>(12.85%)   | 529<br>(87.15%)  | 0 (0%)         | 0 (0%) | 607 |
| 1 | 0 | _B5 | 0 | . | 0 | _E4 | 0 | 1 | _G3 | 0 | 0 | _I6 | 108<br>(19.926%) | 434<br>(80.074%) | 0 (0%)         | 0 (0%) | 542 |
| 1 | 0 | _B5 | 0 | . | 0 | _E4 | 0 | 1 | _G3 | 0 | 1 | _I5 | 0 (0%)           | 5<br>(45.455%)   | 6<br>(54.545%) | 0 (0%) | 11  |
| 1 | 0 | _B5 | 0 | . | 0 | _E4 | 0 | 1 | _G3 | 1 | 0 | _I5 | 0 (0%)           | 90 (100%)        | 0 (0%)         | 0 (0%) | 90  |
| 1 | 0 | _B5 | 0 | . | 0 | _E4 | 0 | 1 | _G3 | 1 | 0 | _I6 | 0 (0%)           | 38 (100%)        | 0 (0%)         | 0 (0%) | 38  |
| 1 | 0 | _B5 | 0 | . | 0 | _E4 | 0 | 1 | _G3 | 1 | 1 | _I6 | 0 (0%)           | 0 (0%)           | 38 (100%)      | 0 (0%) | 38  |
| 1 | 0 | _B5 | 0 | . | 0 | _E4 | 0 | 1 | _G4 | . | 0 | _I5 | 0 (0%)           | 108<br>(100%)    | 0 (0%)         | 0 (0%) | 108 |
| 1 | 0 | _B5 | 0 | . | 0 | _E4 | 0 | 1 | _G4 | . | 0 | _I6 | 22<br>(15.603%)  | 119<br>(84.397%) | 0 (0%)         | 0 (0%) | 141 |
| 1 | 0 | _B5 | 0 | . | 0 | _E4 | 0 | 1 | _G4 | 0 | 0 | _I5 | 6<br>(3.488%)    | 166<br>(96.512%) | 0 (0%)         | 0 (0%) | 172 |
| 1 | 0 | _B5 | 0 | . | 0 | _E4 | 0 | 1 | _G4 | 0 | 0 | _I6 | 45<br>(18.828%)  | 194<br>(81.172%) | 0 (0%)         | 0 (0%) | 239 |
| 1 | 0 | _B5 | 0 | . | 0 | _E4 | 0 | 1 | _G4 | 0 | 1 | _I5 | 0 (0%)           | 2<br>(18.182%)   | 9<br>(81.818%) | 0 (0%) | 11  |
| 1 | 0 | _B5 | 0 | . | 0 | _E4 | 0 | 1 | _G4 | 1 | 0 | _I5 | 0 (0%)           | 36 (100%)        | 0 (0%)         | 0 (0%) | 36  |
| 1 | 0 | _B5 | 0 | . | 0 | _E4 | 0 | 1 | _G4 | 1 | 0 | _I6 | 0 (0%)           | 47 (100%)        | 0 (0%)         | 0 (0%) | 47  |
| 1 | 0 | _B5 | 0 | . | 0 | _E5 | 0 | . | _G3 | . | 0 | _I5 | 34<br>(100%)     | 0 (0%)           | 0 (0%)         | 0 (0%) | 34  |
| 1 | 0 | _B5 | 0 | . | 0 | _E5 | 0 | . | _G3 | . | 0 | _I6 | 48<br>(97.959%)  | 1<br>(2.041%)    | 0 (0%)         | 0 (0%) | 49  |
| 1 | 0 | _B5 | 0 | . | 0 | _E5 | 0 | . | _G4 | . | 0 | _I5 | 49<br>(100%)     | 0 (0%)           | 0 (0%)         | 0 (0%) | 49  |

Supplemental material is neither peer-reviewed nor thoroughly edited by CJASN. The authors alone are responsible for the accuracy and presentation of the material.

|   |   |     |   |   |   |     |   |   |     |   |   |     |                   |                  |                 |               |      |
|---|---|-----|---|---|---|-----|---|---|-----|---|---|-----|-------------------|------------------|-----------------|---------------|------|
| 1 | 0 | _B5 | 0 | . | 0 | _E5 | 0 | . | _G4 | . | 0 | _I6 | 39<br>(100%)      | 0 (0%)           | 0 (0%)          | 0 (0%)        | 39   |
| 1 | 0 | _B5 | 0 | . | 0 | _E5 | 0 | 0 | _G3 | 0 | 0 | _I5 | 1122<br>(100%)    | 0 (0%)           | 0 (0%)          | 0 (0%)        | 1122 |
| 1 | 0 | _B5 | 0 | . | 0 | _E5 | 0 | 0 | _G3 | 0 | 0 | _I6 | 1591<br>(98.392%) | 26<br>(1.608%)   | 0 (0%)          | 0 (0%)        | 1617 |
| 1 | 0 | _B5 | 0 | . | 0 | _E5 | 0 | 0 | _G4 | . | 0 | _I5 | 98<br>(100%)      | 0 (0%)           | 0 (0%)          | 0 (0%)        | 98   |
| 1 | 0 | _B5 | 0 | . | 0 | _E5 | 0 | 0 | _G4 | . | 0 | _I6 | 78<br>(100%)      | 0 (0%)           | 0 (0%)          | 0 (0%)        | 78   |
| 1 | 0 | _B5 | 0 | . | 0 | _E5 | 0 | 0 | _G4 | 0 | 0 | _I5 | 2107<br>(100%)    | 0 (0%)           | 0 (0%)          | 0 (0%)        | 2107 |
| 1 | 0 | _B5 | 0 | . | 0 | _E5 | 0 | 0 | _G4 | 0 | 0 | _I6 | 1677<br>(100%)    | 0 (0%)           | 0 (0%)          | 0 (0%)        | 1677 |
| 1 | 0 | _B5 | 0 | . | 0 | _E5 | 0 | 0 | _G4 | 1 | 0 | _I5 | 0 (0%)            | 49 (100%)        | 0 (0%)          | 0 (0%)        | 49   |
| 1 | 0 | _B5 | 0 | . | 0 | _E5 | 0 | 0 | _G4 | 1 | 1 | _I6 | 0 (0%)            | 0 (0%)           | 39 (100%)       | 0 (0%)        | 39   |
| 1 | 0 | _B5 | 0 | . | 0 | _E5 | 0 | 1 | _G3 | . | 0 | _I5 | 0 (0%)            | 170<br>(100%)    | 0 (0%)          | 0 (0%)        | 170  |
| 1 | 0 | _B5 | 0 | . | 0 | _E5 | 0 | 1 | _G3 | . | 0 | _I6 | 21<br>(8.571%)    | 224<br>(91.429%) | 0 (0%)          | 0 (0%)        | 245  |
| 1 | 0 | _B5 | 0 | . | 0 | _E5 | 0 | 1 | _G3 | 0 | 0 | _I5 | 64<br>(12.749%)   | 438<br>(87.251%) | 0 (0%)          | 0 (0%)        | 502  |
| 1 | 0 | _B5 | 0 | . | 0 | _E5 | 0 | 1 | _G3 | 0 | 0 | _I6 | 203<br>(27.322%)  | 540<br>(72.678%) | 0 (0%)          | 0 (0%)        | 743  |
| 1 | 0 | _B5 | 0 | . | 0 | _E5 | 0 | 1 | _G3 | 0 | 1 | _I5 | 0 (0%)            | 9<br>(81.818%)   | 2<br>(18.182%)  | 0 (0%)        | 11   |
| 1 | 0 | _B5 | 0 | . | 0 | _E5 | 0 | 1 | _G3 | 1 | 0 | _I5 | 0 (0%)            | 68 (100%)        | 0 (0%)          | 0 (0%)        | 68   |
| 1 | 0 | _B5 | 0 | . | 0 | _E5 | 0 | 1 | _G3 | 1 | 0 | _I6 | 0 (0%)            | 49 (100%)        | 0 (0%)          | 0 (0%)        | 49   |
| 1 | 0 | _B5 | 0 | . | 0 | _E5 | 0 | 1 | _G3 | 1 | 1 | _I6 | 0 (0%)            | 0 (0%)           | 48<br>(97.959%) | 1<br>(2.041%) | 49   |
| 1 | 0 | _B5 | 0 | . | 0 | _E5 | 0 | 1 | _G4 | . | 0 | _I5 | 0 (0%)            | 147<br>(100%)    | 0 (0%)          | 0 (0%)        | 147  |
| 1 | 0 | _B5 | 0 | . | 0 | _E5 | 0 | 1 | _G4 | . | 0 | _I6 | 28<br>(23.932%)   | 89<br>(76.068%)  | 0 (0%)          | 0 (0%)        | 117  |

|   |   |     |   |   |   |     |   |   |     |   |   |     |                 |                  |                 |        |     |
|---|---|-----|---|---|---|-----|---|---|-----|---|---|-----|-----------------|------------------|-----------------|--------|-----|
| 1 | 0 | _B5 | 0 | . | 0 | _E5 | 0 | 1 | _G4 | 0 | 0 | _I5 | 21<br>(8.936%)  | 214<br>(91.064%) | 0 (0%)          | 0 (0%) | 235 |
| 1 | 0 | _B5 | 0 | . | 0 | _E5 | 0 | 1 | _G4 | 0 | 0 | _I6 | 62<br>(32.292%) | 130<br>(67.708%) | 0 (0%)          | 0 (0%) | 192 |
| 1 | 0 | _B5 | 0 | . | 0 | _E5 | 0 | 1 | _G4 | 0 | 1 | _I5 | 0 (0%)          | 2<br>(16.667%)   | 10<br>(83.333%) | 0 (0%) | 12  |
| 1 | 0 | _B5 | 0 | . | 0 | _E5 | 0 | 1 | _G4 | 1 | 0 | _I5 | 0 (0%)          | 49 (100%)        | 0 (0%)          | 0 (0%) | 49  |
| 1 | 0 | _B5 | 0 | . | 0 | _E5 | 0 | 1 | _G4 | 1 | 0 | _I6 | 0 (0%)          | 39 (100%)        | 0 (0%)          | 0 (0%) | 39  |
| 1 | 0 | _B5 | 0 | . | 1 | _E3 | 0 | . | _G3 | . | 0 | _I5 | 0 (0%)          | 37 (100%)        | 0 (0%)          | 0 (0%) | 37  |
| 1 | 0 | _B5 | 0 | . | 1 | _E3 | 0 | . | _G3 | . | 0 | _I6 | 0 (0%)          | 42 (100%)        | 0 (0%)          | 0 (0%) | 42  |
| 1 | 0 | _B5 | 0 | . | 1 | _E3 | 0 | . | _G4 | . | 0 | _I5 | 0 (0%)          | 42 (100%)        | 0 (0%)          | 0 (0%) | 42  |
| 1 | 0 | _B5 | 0 | . | 1 | _E3 | 0 | . | _G4 | . | 0 | _I6 | 0 (0%)          | 42 (100%)        | 0 (0%)          | 0 (0%) | 42  |
| 1 | 0 | _B5 | 0 | . | 1 | _E3 | 0 | 0 | _G4 | 0 | 0 | _I5 | 0 (0%)          | 252<br>(100%)    | 0 (0%)          | 0 (0%) | 252 |
| 1 | 0 | _B5 | 0 | . | 1 | _E3 | 0 | 0 | _G4 | 0 | 0 | _I6 | 252<br>(100%)   | 0 (0%)           | 0 (0%)          | 0 (0%) | 252 |
| 1 | 0 | _B5 | 0 | . | 1 | _E3 | 0 | 1 | _G3 | . | 0 | _I5 | 0 (0%)          | 37 (100%)        | 0 (0%)          | 0 (0%) | 37  |
| 1 | 0 | _B5 | 0 | . | 1 | _E3 | 0 | 1 | _G3 | . | 0 | _I6 | 0 (0%)          | 42 (100%)        | 0 (0%)          | 0 (0%) | 42  |
| 1 | 0 | _B5 | 0 | . | 1 | _E3 | 0 | 1 | _G3 | 0 | 0 | _I5 | 0 (0%)          | 444<br>(100%)    | 0 (0%)          | 0 (0%) | 444 |
| 1 | 0 | _B5 | 0 | . | 1 | _E3 | 0 | 1 | _G3 | 0 | 0 | _I6 | 0 (0%)          | 546<br>(100%)    | 0 (0%)          | 0 (0%) | 546 |
| 1 | 0 | _B5 | 0 | . | 1 | _E3 | 0 | 1 | _G3 | 0 | 1 | _I5 | 0 (0%)          | 0 (0%)           | 37 (100%)       | 0 (0%) | 37  |
| 1 | 0 | _B5 | 0 | . | 1 | _E3 | 0 | 1 | _G4 | . | 0 | _I5 | 0 (0%)          | 42 (100%)        | 0 (0%)          | 0 (0%) | 42  |
| 1 | 0 | _B5 | 0 | . | 1 | _E3 | 0 | 1 | _G4 | . | 0 | _I6 | 0 (0%)          | 42 (100%)        | 0 (0%)          | 0 (0%) | 42  |
| 1 | 0 | _B5 | 0 | . | 1 | _E3 | 0 | 1 | _G4 | 0 | 0 | _I5 | 0 (0%)          | 252<br>(100%)    | 0 (0%)          | 0 (0%) | 252 |
| 1 | 0 | _B5 | 0 | . | 1 | _E3 | 0 | 1 | _G4 | 0 | 0 | _I6 | 0 (0%)          | 294<br>(100%)    | 0 (0%)          | 0 (0%) | 294 |
| 1 | 0 | _B5 | 0 | . | 1 | _E3 | 0 | 1 | _G4 | 0 | 1 | _I5 | 0 (0%)          | 0 (0%)           | 42 (100%)       | 0 (0%) | 42  |

|   |   |     |   |   |   |     |   |   |     |   |   |     |                 |                 |               |        |     |
|---|---|-----|---|---|---|-----|---|---|-----|---|---|-----|-----------------|-----------------|---------------|--------|-----|
| 1 | 0 | _B5 | 0 | . | 1 | _E4 | 0 | 0 | _G4 | 0 | 0 | _I5 | 0 (0%)          | 36 (100%)       | 0 (0%)        | 0 (0%) | 36  |
| 1 | 0 | _B5 | 0 | . | 1 | _E4 | 0 | 0 | _G4 | 0 | 0 | _I6 | 12<br>(25.532%) | 35<br>(74.468%) | 0 (0%)        | 0 (0%) | 47  |
| 1 | 0 | _B5 | 0 | . | 1 | _E4 | 0 | 1 | _G3 | 0 | 0 | _I5 | 0 (0%)          | 113<br>(100%)   | 0 (0%)        | 0 (0%) | 113 |
| 1 | 0 | _B5 | 0 | . | 1 | _E4 | 0 | 1 | _G3 | 0 | 0 | _I6 | 0 (0%)          | 104<br>(100%)   | 0 (0%)        | 0 (0%) | 104 |
| 1 | 0 | _B5 | 0 | . | 1 | _E4 | 0 | 1 | _G3 | 0 | 1 | _I5 | 0 (0%)          | 0 (0%)          | 34 (100%)     | 0 (0%) | 34  |
| 1 | 0 | _B5 | 0 | . | 1 | _E4 | 0 | 1 | _G4 | 0 | 0 | _I5 | 0 (0%)          | 44 (100%)       | 0 (0%)        | 0 (0%) | 44  |
| 1 | 0 | _B5 | 0 | . | 1 | _E4 | 0 | 1 | _G4 | 0 | 0 | _I6 | 0 (0%)          | 90 (100%)       | 0 (0%)        | 0 (0%) | 90  |
| 1 | 0 | _B5 | 0 | . | 1 | _E4 | 0 | 1 | _G4 | 0 | 1 | _I5 | 0 (0%)          | 0 (0%)          | 25 (100%)     | 0 (0%) | 25  |
| 1 | 0 | _B5 | 0 | . | 1 | _E5 | 0 | 1 | _G3 | 0 | 0 | _I5 | 0 (0%)          | 42 (100%)       | 0 (0%)        | 0 (0%) | 42  |
| 1 | 0 | _B5 | 0 | . | 1 | _E5 | 0 | 1 | _G3 | 0 | 0 | _I6 | 0 (0%)          | 88<br>(97.778%) | 2<br>(2.222%) | 0 (0%) | 90  |
| 1 | 0 | _B5 | 0 | . | 1 | _E5 | 0 | 1 | _G3 | 0 | 1 | _I5 | 0 (0%)          | 0 (0%)          | 23 (100%)     | 0 (0%) | 23  |
| 1 | 0 | _B5 | 0 | . | 1 | _E5 | 0 | 1 | _G4 | 0 | 0 | _I5 | 0 (0%)          | 59 (100%)       | 0 (0%)        | 0 (0%) | 59  |
| 1 | 0 | _B5 | 0 | . | 1 | _E5 | 0 | 1 | _G4 | 0 | 0 | _I6 | 0 (0%)          | 81 (100%)       | 0 (0%)        | 0 (0%) | 81  |
| 1 | 0 | _B5 | 0 | . | 1 | _E5 | 0 | 1 | _G4 | 0 | 1 | _I5 | 0 (0%)          | 0 (0%)          | 37 (100%)     | 0 (0%) | 37  |
| 1 | 0 | _B5 | 0 | 0 | 0 | _E3 | 0 | . | _G3 | . | 0 | _I5 | 148<br>(100%)   | 0 (0%)          | 0 (0%)        | 0 (0%) | 148 |
| 1 | 0 | _B5 | 0 | 0 | 0 | _E3 | 0 | . | _G3 | . | 0 | _I6 | 168<br>(100%)   | 0 (0%)          | 0 (0%)        | 0 (0%) | 168 |
| 1 | 0 | _B5 | 0 | 0 | 0 | _E3 | 0 | . | _G3 | 0 | 0 | _I5 | 37<br>(100%)    | 0 (0%)          | 0 (0%)        | 0 (0%) | 37  |
| 1 | 0 | _B5 | 0 | 0 | 0 | _E3 | 0 | . | _G3 | 0 | 0 | _I6 | 42<br>(100%)    | 0 (0%)          | 0 (0%)        | 0 (0%) | 42  |
| 1 | 0 | _B5 | 0 | 0 | 0 | _E3 | 0 | . | _G4 | . | 0 | _I5 | 168<br>(100%)   | 0 (0%)          | 0 (0%)        | 0 (0%) | 168 |
| 1 | 0 | _B5 | 0 | 0 | 0 | _E3 | 0 | . | _G4 | . | 0 | _I6 | 168<br>(100%)   | 0 (0%)          | 0 (0%)        | 0 (0%) | 168 |
| 1 | 0 | _B5 | 0 | 0 | 0 | _E3 | 0 | . | _G4 | 0 | 0 | _I5 | 42<br>(100%)    | 0 (0%)          | 0 (0%)        | 0 (0%) | 42  |

|   |   |     |   |   |   |     |   |   |     |   |   |     |                  |                  |        |        |      |
|---|---|-----|---|---|---|-----|---|---|-----|---|---|-----|------------------|------------------|--------|--------|------|
| 1 | 0 | _B5 | 0 | 0 | 0 | _E3 | 0 | . | _G4 | 0 | 0 | _I6 | 42<br>(100%)     | 0 (0%)           | 0 (0%) | 0 (0%) | 42   |
| 1 | 0 | _B5 | 0 | 0 | 0 | _E3 | 0 | 0 | _G3 | . | 0 | _I5 | 407<br>(100%)    | 0 (0%)           | 0 (0%) | 0 (0%) | 407  |
| 1 | 0 | _B5 | 0 | 0 | 0 | _E3 | 0 | 0 | _G3 | . | 0 | _I6 | 462<br>(100%)    | 0 (0%)           | 0 (0%) | 0 (0%) | 462  |
| 1 | 0 | _B5 | 0 | 0 | 0 | _E3 | 0 | 0 | _G3 | 0 | 0 | _I5 | 6031<br>(100%)   | 0 (0%)           | 0 (0%) | 0 (0%) | 6031 |
| 1 | 0 | _B5 | 0 | 0 | 0 | _E3 | 0 | 0 | _G3 | 0 | 0 | _I6 | 6846<br>(100%)   | 0 (0%)           | 0 (0%) | 0 (0%) | 6846 |
| 1 | 0 | _B5 | 0 | 0 | 0 | _E3 | 0 | 0 | _G3 | 1 | 0 | _I5 | 74<br>(100%)     | 0 (0%)           | 0 (0%) | 0 (0%) | 74   |
| 1 | 0 | _B5 | 0 | 0 | 0 | _E3 | 0 | 0 | _G3 | 1 | 0 | _I6 | 84<br>(100%)     | 0 (0%)           | 0 (0%) | 0 (0%) | 84   |
| 1 | 0 | _B5 | 0 | 0 | 0 | _E3 | 0 | 0 | _G4 | . | 0 | _I5 | 588<br>(100%)    | 0 (0%)           | 0 (0%) | 0 (0%) | 588  |
| 1 | 0 | _B5 | 0 | 0 | 0 | _E3 | 0 | 0 | _G4 | . | 0 | _I6 | 588<br>(100%)    | 0 (0%)           | 0 (0%) | 0 (0%) | 588  |
| 1 | 0 | _B5 | 0 | 0 | 0 | _E3 | 0 | 0 | _G4 | 0 | 0 | _I5 | 7560<br>(100%)   | 0 (0%)           | 0 (0%) | 0 (0%) | 7560 |
| 1 | 0 | _B5 | 0 | 0 | 0 | _E3 | 0 | 0 | _G4 | 0 | 0 | _I6 | 7560<br>(100%)   | 0 (0%)           | 0 (0%) | 0 (0%) | 7560 |
| 1 | 0 | _B5 | 0 | 0 | 0 | _E3 | 0 | 0 | _G4 | 1 | 0 | _I5 | 0 (0%)           | 84 (100%)        | 0 (0%) | 0 (0%) | 84   |
| 1 | 0 | _B5 | 0 | 0 | 0 | _E3 | 0 | 0 | _G4 | 1 | 0 | _I6 | 84<br>(100%)     | 0 (0%)           | 0 (0%) | 0 (0%) | 84   |
| 1 | 0 | _B5 | 0 | 0 | 0 | _E3 | 0 | 1 | _G3 | . | 0 | _I5 | 0 (0%)           | 148<br>(100%)    | 0 (0%) | 0 (0%) | 148  |
| 1 | 0 | _B5 | 0 | 0 | 0 | _E3 | 0 | 1 | _G3 | . | 0 | _I6 | 84<br>(50%)      | 84 (50%)         | 0 (0%) | 0 (0%) | 168  |
| 1 | 0 | _B5 | 0 | 0 | 0 | _E3 | 0 | 1 | _G3 | 0 | 0 | _I5 | 37<br>(4.762%)   | 740<br>(95.238%) | 0 (0%) | 0 (0%) | 777  |
| 1 | 0 | _B5 | 0 | 0 | 0 | _E3 | 0 | 1 | _G3 | 0 | 0 | _I6 | 630<br>(71.429%) | 252<br>(28.571%) | 0 (0%) | 0 (0%) | 882  |
| 1 | 0 | _B5 | 0 | 0 | 0 | _E3 | 0 | 1 | _G4 | . | 0 | _I5 | 0 (0%)           | 42 (100%)        | 0 (0%) | 0 (0%) | 42   |
| 1 | 0 | _B5 | 0 | 0 | 0 | _E3 | 0 | 1 | _G4 | . | 0 | _I6 | 0 (0%)           | 42 (100%)        | 0 (0%) | 0 (0%) | 42   |
| 1 | 0 | _B5 | 0 | 0 | 0 | _E3 | 0 | 1 | _G4 | 0 | 0 | _I5 | 0 (0%)           | 168<br>(100%)    | 0 (0%) | 0 (0%) | 168  |
| 1 | 0 | _B5 | 0 | 0 | 0 | _E3 | 0 | 1 | _G4 | 0 | 0 | _I6 | 0 (0%)           | 168<br>(100%)    | 0 (0%) | 0 (0%) | 168  |

*Supplemental material is neither peer-reviewed nor thoroughly edited by CJASN. The authors alone are responsible for the accuracy and presentation of the material.*

|   |   |     |   |   |   |     |   |   |     |   |   |     |                |           |        |        |      |
|---|---|-----|---|---|---|-----|---|---|-----|---|---|-----|----------------|-----------|--------|--------|------|
| 1 | 0 | _B5 | 0 | 0 | 0 | _E3 | 1 | 0 | _G3 | 0 | 0 | _I5 | 111<br>(100%)  | 0 (0%)    | 0 (0%) | 0 (0%) | 111  |
| 1 | 0 | _B5 | 0 | 0 | 0 | _E3 | 1 | 0 | _G3 | 0 | 0 | _I6 | 126<br>(100%)  | 0 (0%)    | 0 (0%) | 0 (0%) | 126  |
| 1 | 0 | _B5 | 0 | 0 | 0 | _E3 | 1 | 0 | _G4 | 0 | 0 | _I5 | 168<br>(100%)  | 0 (0%)    | 0 (0%) | 0 (0%) | 168  |
| 1 | 0 | _B5 | 0 | 0 | 0 | _E3 | 1 | 0 | _G4 | 0 | 0 | _I6 | 168<br>(100%)  | 0 (0%)    | 0 (0%) | 0 (0%) | 168  |
| 1 | 0 | _B5 | 0 | 0 | 0 | _E3 | 1 | 1 | _G3 | 0 | 0 | _I5 | 0 (0%)         | 37 (100%) | 0 (0%) | 0 (0%) | 37   |
| 1 | 0 | _B5 | 0 | 0 | 0 | _E3 | 1 | 1 | _G3 | 0 | 0 | _I6 | 0 (0%)         | 42 (100%) | 0 (0%) | 0 (0%) | 42   |
| 1 | 0 | _B5 | 0 | 0 | 0 | _E4 | 0 | . | _G3 | . | 0 | _I5 | 195<br>(100%)  | 0 (0%)    | 0 (0%) | 0 (0%) | 195  |
| 1 | 0 | _B5 | 0 | 0 | 0 | _E4 | 0 | . | _G3 | . | 0 | _I6 | 162<br>(100%)  | 0 (0%)    | 0 (0%) | 0 (0%) | 162  |
| 1 | 0 | _B5 | 0 | 0 | 0 | _E4 | 0 | . | _G3 | 0 | 0 | _I5 | 45<br>(100%)   | 0 (0%)    | 0 (0%) | 0 (0%) | 45   |
| 1 | 0 | _B5 | 0 | 0 | 0 | _E4 | 0 | . | _G3 | 0 | 0 | _I6 | 38<br>(100%)   | 0 (0%)    | 0 (0%) | 0 (0%) | 38   |
| 1 | 0 | _B5 | 0 | 0 | 0 | _E4 | 0 | . | _G4 | . | 0 | _I5 | 155<br>(100%)  | 0 (0%)    | 0 (0%) | 0 (0%) | 155  |
| 1 | 0 | _B5 | 0 | 0 | 0 | _E4 | 0 | . | _G4 | . | 0 | _I6 | 204<br>(100%)  | 0 (0%)    | 0 (0%) | 0 (0%) | 204  |
| 1 | 0 | _B5 | 0 | 0 | 0 | _E4 | 0 | . | _G4 | 0 | 0 | _I5 | 36<br>(100%)   | 0 (0%)    | 0 (0%) | 0 (0%) | 36   |
| 1 | 0 | _B5 | 0 | 0 | 0 | _E4 | 0 | . | _G4 | 0 | 0 | _I6 | 47<br>(100%)   | 0 (0%)    | 0 (0%) | 0 (0%) | 47   |
| 1 | 0 | _B5 | 0 | 0 | 0 | _E4 | 0 | 0 | _G3 | . | 0 | _I5 | 540<br>(100%)  | 0 (0%)    | 0 (0%) | 0 (0%) | 540  |
| 1 | 0 | _B5 | 0 | 0 | 0 | _E4 | 0 | 0 | _G3 | . | 0 | _I6 | 456<br>(100%)  | 0 (0%)    | 0 (0%) | 0 (0%) | 456  |
| 1 | 0 | _B5 | 0 | 0 | 0 | _E4 | 0 | 0 | _G3 | 0 | 0 | _I5 | 7631<br>(100%) | 0 (0%)    | 0 (0%) | 0 (0%) | 7631 |
| 1 | 0 | _B5 | 0 | 0 | 0 | _E4 | 0 | 0 | _G3 | 0 | 0 | _I6 | 6447<br>(100%) | 0 (0%)    | 0 (0%) | 0 (0%) | 6447 |
| 1 | 0 | _B5 | 0 | 0 | 0 | _E4 | 0 | 0 | _G3 | 1 | 0 | _I5 | 0 (0%)         | 90 (100%) | 0 (0%) | 0 (0%) | 90   |
| 1 | 0 | _B5 | 0 | 0 | 0 | _E4 | 0 | 0 | _G3 | 1 | 0 | _I6 | 76<br>(100%)   | 0 (0%)    | 0 (0%) | 0 (0%) | 76   |
| 1 | 0 | _B5 | 0 | 0 | 0 | _E4 | 0 | 0 | _G4 | . | 0 | _I5 | 587<br>(100%)  | 0 (0%)    | 0 (0%) | 0 (0%) | 587  |

|   |   |     |   |   |   |     |   |   |     |   |   |     |                  |                   |                 |        |       |
|---|---|-----|---|---|---|-----|---|---|-----|---|---|-----|------------------|-------------------|-----------------|--------|-------|
| 1 | 0 | _B5 | 0 | 0 | 0 | _E4 | 0 | 0 | _G4 | . | 0 | _I6 | 767<br>(100%)    | 0 (0%)            | 0 (0%)          | 0 (0%) | 767   |
| 1 | 0 | _B5 | 0 | 0 | 0 | _E4 | 0 | 0 | _G4 | 0 | 0 | _I5 | 7855<br>(100%)   | 0 (0%)            | 0 (0%)          | 0 (0%) | 7855  |
| 1 | 0 | _B5 | 0 | 0 | 0 | _E4 | 0 | 0 | _G4 | 0 | 0 | _I6 | 10245<br>(100%)  | 0 (0%)            | 0 (0%)          | 0 (0%) | 10245 |
| 1 | 0 | _B5 | 0 | 0 | 0 | _E4 | 0 | 0 | _G4 | 1 | 0 | _I5 | 0 (0%)           | 72 (100%)         | 0 (0%)          | 0 (0%) | 72    |
| 1 | 0 | _B5 | 0 | 0 | 0 | _E4 | 0 | 0 | _G4 | 1 | 0 | _I6 | 94<br>(100%)     | 0 (0%)            | 0 (0%)          | 0 (0%) | 94    |
| 1 | 0 | _B5 | 0 | 0 | 0 | _E4 | 0 | 1 | _G3 | . | 0 | _I5 | 5<br>(1.285%)    | 384<br>(98.715%)  | 0 (0%)          | 0 (0%) | 389   |
| 1 | 0 | _B5 | 0 | 0 | 0 | _E4 | 0 | 1 | _G3 | . | 0 | _I6 | 43<br>(12.536%)  | 300<br>(87.464%)  | 0 (0%)          | 0 (0%) | 343   |
| 1 | 0 | _B5 | 0 | 0 | 0 | _E4 | 0 | 1 | _G3 | . | 1 | _I5 | 0 (0%)           | 6 (50%)           | 6 (50%)         | 0 (0%) | 12    |
| 1 | 0 | _B5 | 0 | 0 | 0 | _E4 | 0 | 1 | _G3 | 0 | 0 | _I5 | 190<br>(5.379%)  | 3342<br>(94.621%) | 0 (0%)          | 0 (0%) | 3532  |
| 1 | 0 | _B5 | 0 | 0 | 0 | _E4 | 0 | 1 | _G3 | 0 | 0 | _I6 | 506<br>(16.531%) | 2555<br>(83.469%) | 0 (0%)          | 0 (0%) | 3061  |
| 1 | 0 | _B5 | 0 | 0 | 0 | _E4 | 0 | 1 | _G3 | 0 | 1 | _I5 | 0 (0%)           | 72<br>(72.727%)   | 27<br>(27.273%) | 0 (0%) | 99    |
| 1 | 0 | _B5 | 0 | 0 | 0 | _E4 | 0 | 1 | _G3 | 1 | 0 | _I5 | 0 (0%)           | 148<br>(100%)     | 0 (0%)          | 0 (0%) | 148   |
| 1 | 0 | _B5 | 0 | 0 | 0 | _E4 | 0 | 1 | _G3 | 1 | 0 | _I6 | 0 (0%)           | 58 (100%)         | 0 (0%)          | 0 (0%) | 58    |
| 1 | 0 | _B5 | 0 | 0 | 0 | _E4 | 0 | 1 | _G3 | 1 | 1 | _I5 | 0 (0%)           | 28<br>(90.323%)   | 3<br>(9.677%)   | 0 (0%) | 31    |
| 1 | 0 | _B5 | 0 | 0 | 0 | _E4 | 0 | 1 | _G3 | 1 | 1 | _I6 | 0 (0%)           | 0 (0%)            | 92 (100%)       | 0 (0%) | 92    |
| 1 | 0 | _B5 | 0 | 0 | 0 | _E4 | 0 | 1 | _G4 | . | 0 | _I5 | 2<br>(1.258%)    | 157<br>(98.742%)  | 0 (0%)          | 0 (0%) | 159   |
| 1 | 0 | _B5 | 0 | 0 | 0 | _E4 | 0 | 1 | _G4 | . | 0 | _I6 | 37<br>(16.895%)  | 182<br>(83.105%)  | 0 (0%)          | 0 (0%) | 219   |
| 1 | 0 | _B5 | 0 | 0 | 0 | _E4 | 0 | 1 | _G4 | . | 1 | _I5 | 0 (0%)           | 1<br>(9.091%)     | 10<br>(90.909%) | 0 (0%) | 11    |
| 1 | 0 | _B5 | 0 | 0 | 0 | _E4 | 0 | 1 | _G4 | 0 | 0 | _I5 | 19<br>(1.707%)   | 1094<br>(98.293%) | 0 (0%)          | 0 (0%) | 1113  |

|   |   |     |   |   |   |     |   |   |     |   |   |     |                      |                   |                 |        |      |
|---|---|-----|---|---|---|-----|---|---|-----|---|---|-----|----------------------|-------------------|-----------------|--------|------|
| 1 | 0 | _B5 | 0 | 0 | 0 | _E4 | 0 | 1 | _G4 | 0 | 0 | _I6 | 249<br>(16.296<br>%) | 1279<br>(83.704%) | 0 (0%)          | 0 (0%) | 1528 |
| 1 | 0 | _B5 | 0 | 0 | 0 | _E4 | 0 | 1 | _G4 | 0 | 1 | _I5 | 0 (0%)               | 13<br>(24.074%)   | 41<br>(75.926%) | 0 (0%) | 54   |
| 1 | 0 | _B5 | 0 | 0 | 0 | _E4 | 0 | 1 | _G4 | 1 | 0 | _I5 | 0 (0%)               | 127<br>(100%)     | 0 (0%)          | 0 (0%) | 127  |
| 1 | 0 | _B5 | 0 | 0 | 0 | _E4 | 0 | 1 | _G4 | 1 | 0 | _I6 | 0 (0%)               | 87 (100%)         | 0 (0%)          | 0 (0%) | 87   |
| 1 | 0 | _B5 | 0 | 0 | 0 | _E4 | 0 | 1 | _G4 | 1 | 1 | _I5 | 0 (0%)               | 19<br>(70.37%)    | 8<br>(29.63%)   | 0 (0%) | 27   |
| 1 | 0 | _B5 | 0 | 0 | 0 | _E4 | 0 | 1 | _G4 | 1 | 1 | _I6 | 0 (0%)               | 0 (0%)            | 109<br>(100%)   | 0 (0%) | 109  |
| 1 | 0 | _B5 | 0 | 0 | 0 | _E4 | 1 | 0 | _G3 | 0 | 0 | _I5 | 91<br>(67.407<br>%)  | 44<br>(32.593%)   | 0 (0%)          | 0 (0%) | 135  |
| 1 | 0 | _B5 | 0 | 0 | 0 | _E4 | 1 | 0 | _G3 | 0 | 0 | _I6 | 114<br>(100%)        | 0 (0%)            | 0 (0%)          | 0 (0%) | 114  |
| 1 | 0 | _B5 | 0 | 0 | 0 | _E4 | 1 | 0 | _G4 | 0 | 0 | _I5 | 88<br>(61.111<br>%)  | 56<br>(38.889%)   | 0 (0%)          | 0 (0%) | 144  |
| 1 | 0 | _B5 | 0 | 0 | 0 | _E4 | 1 | 0 | _G4 | 0 | 0 | _I6 | 188<br>(100%)        | 0 (0%)            | 0 (0%)          | 0 (0%) | 188  |
| 1 | 0 | _B5 | 0 | 0 | 0 | _E4 | 1 | 1 | _G3 | 0 | 0 | _I5 | 0 (0%)               | 121<br>(100%)     | 0 (0%)          | 0 (0%) | 121  |
| 1 | 0 | _B5 | 0 | 0 | 0 | _E4 | 1 | 1 | _G3 | 0 | 0 | _I6 | 0 (0%)               | 119<br>(100%)     | 0 (0%)          | 0 (0%) | 119  |
| 1 | 0 | _B5 | 0 | 0 | 0 | _E4 | 1 | 1 | _G3 | 0 | 1 | _I5 | 0 (0%)               | 11<br>(61.111%)   | 7<br>(38.889%)  | 0 (0%) | 18   |
| 1 | 0 | _B5 | 0 | 0 | 0 | _E4 | 1 | 1 | _G4 | 0 | 0 | _I5 | 0 (0%)               | 66 (100%)         | 0 (0%)          | 0 (0%) | 66   |
| 1 | 0 | _B5 | 0 | 0 | 0 | _E4 | 1 | 1 | _G4 | 0 | 0 | _I6 | 0 (0%)               | 96 (100%)         | 0 (0%)          | 0 (0%) | 96   |
| 1 | 0 | _B5 | 0 | 0 | 0 | _E4 | 1 | 1 | _G4 | 0 | 1 | _I5 | 0 (0%)               | 1 (12.5%)         | 7 (87.5%)       | 0 (0%) | 8    |
| 1 | 0 | _B5 | 0 | 0 | 0 | _E5 | 0 | . | _G3 | . | 0 | _I5 | 142<br>(100%)        | 0 (0%)            | 0 (0%)          | 0 (0%) | 142  |
| 1 | 0 | _B5 | 0 | 0 | 0 | _E5 | 0 | . | _G3 | . | 0 | _I6 | 214<br>(97.717<br>%) | 5<br>(2.283%)     | 0 (0%)          | 0 (0%) | 219  |
| 1 | 0 | _B5 | 0 | 0 | 0 | _E5 | 0 | . | _G3 | 0 | 0 | _I5 | 34<br>(100%)         | 0 (0%)            | 0 (0%)          | 0 (0%) | 34   |
| 1 | 0 | _B5 | 0 | 0 | 0 | _E5 | 0 | . | _G3 | 0 | 0 | _I6 | 48<br>(97.959<br>%)  | 1<br>(2.041%)     | 0 (0%)          | 0 (0%) | 49   |

Supplemental material is neither peer-reviewed nor thoroughly edited by CJASN. The authors alone are responsible for the accuracy and presentation of the material.

|   |   |     |   |   |   |     |   |   |     |   |   |     |                   |                  |                |        |       |
|---|---|-----|---|---|---|-----|---|---|-----|---|---|-----|-------------------|------------------|----------------|--------|-------|
| 1 | 0 | _B5 | 0 | 0 | 0 | _E5 | 0 | . | _G4 | . | 0 | _I5 | 216<br>(100%)     | 0 (0%)           | 0 (0%)         | 0 (0%) | 216   |
| 1 | 0 | _B5 | 0 | 0 | 0 | _E5 | 0 | . | _G4 | . | 0 | _I6 | 168<br>(100%)     | 0 (0%)           | 0 (0%)         | 0 (0%) | 168   |
| 1 | 0 | _B5 | 0 | 0 | 0 | _E5 | 0 | . | _G4 | 0 | 0 | _I5 | 49<br>(100%)      | 0 (0%)           | 0 (0%)         | 0 (0%) | 49    |
| 1 | 0 | _B5 | 0 | 0 | 0 | _E5 | 0 | . | _G4 | 0 | 0 | _I6 | 39<br>(100%)      | 0 (0%)           | 0 (0%)         | 0 (0%) | 39    |
| 1 | 0 | _B5 | 0 | 0 | 0 | _E5 | 0 | 0 | _G3 | . | 0 | _I5 | 408<br>(100%)     | 0 (0%)           | 0 (0%)         | 0 (0%) | 408   |
| 1 | 0 | _B5 | 0 | 0 | 0 | _E5 | 0 | 0 | _G3 | . | 0 | _I6 | 579<br>(98.469%)  | 9<br>(1.531%)    | 0 (0%)         | 0 (0%) | 588   |
| 1 | 0 | _B5 | 0 | 0 | 0 | _E5 | 0 | 0 | _G3 | 0 | 0 | _I5 | 5773<br>(100%)    | 0 (0%)           | 0 (0%)         | 0 (0%) | 5773  |
| 1 | 0 | _B5 | 0 | 0 | 0 | _E5 | 0 | 0 | _G3 | 0 | 0 | _I6 | 8183<br>(98.353%) | 137<br>(1.647%)  | 0 (0%)         | 0 (0%) | 8320  |
| 1 | 0 | _B5 | 0 | 0 | 0 | _E5 | 0 | 0 | _G3 | 1 | 0 | _I5 | 0 (0%)            | 68 (100%)        | 0 (0%)         | 0 (0%) | 68    |
| 1 | 0 | _B5 | 0 | 0 | 0 | _E5 | 0 | 0 | _G3 | 1 | 0 | _I6 | 96<br>(97.959%)   | 2<br>(2.041%)    | 0 (0%)         | 0 (0%) | 98    |
| 1 | 0 | _B5 | 0 | 0 | 0 | _E5 | 0 | 0 | _G4 | . | 0 | _I5 | 800<br>(100%)     | 0 (0%)           | 0 (0%)         | 0 (0%) | 800   |
| 1 | 0 | _B5 | 0 | 0 | 0 | _E5 | 0 | 0 | _G4 | . | 0 | _I6 | 638<br>(100%)     | 0 (0%)           | 0 (0%)         | 0 (0%) | 638   |
| 1 | 0 | _B5 | 0 | 0 | 0 | _E5 | 0 | 0 | _G4 | 0 | 0 | _I5 | 10677<br>(100%)   | 0 (0%)           | 0 (0%)         | 0 (0%) | 10677 |
| 1 | 0 | _B5 | 0 | 0 | 0 | _E5 | 0 | 0 | _G4 | 0 | 0 | _I6 | 8511<br>(100%)    | 0 (0%)           | 0 (0%)         | 0 (0%) | 8511  |
| 1 | 0 | _B5 | 0 | 0 | 0 | _E5 | 0 | 0 | _G4 | 1 | 0 | _I5 | 0 (0%)            | 98 (100%)        | 0 (0%)         | 0 (0%) | 98    |
| 1 | 0 | _B5 | 0 | 0 | 0 | _E5 | 0 | 0 | _G4 | 1 | 0 | _I6 | 78<br>(100%)      | 0 (0%)           | 0 (0%)         | 0 (0%) | 78    |
| 1 | 0 | _B5 | 0 | 0 | 0 | _E5 | 0 | 1 | _G3 | . | 0 | _I5 | 2<br>(0.671%)     | 296<br>(99.329%) | 0 (0%)         | 0 (0%) | 298   |
| 1 | 0 | _B5 | 0 | 0 | 0 | _E5 | 0 | 1 | _G3 | . | 0 | _I6 | 87<br>(19.42%)    | 361<br>(80.58%)  | 0 (0%)         | 0 (0%) | 448   |
| 1 | 0 | _B5 | 0 | 0 | 0 | _E5 | 0 | 1 | _G3 | . | 1 | _I5 | 0 (0%)            | 11<br>(84.615%)  | 2<br>(15.385%) | 0 (0%) | 13    |

|   |   |     |   |   |   |     |   |   |     |   |   |     |                  |                   |                 |           |      |
|---|---|-----|---|---|---|-----|---|---|-----|---|---|-----|------------------|-------------------|-----------------|-----------|------|
| 1 | 0 | _B5 | 0 | 0 | 0 | _E5 | 0 | 1 | _G3 | 0 | 0 | _I5 | 144<br>(5.405%)  | 2520<br>(94.595%) | 0 (0%)          | 0 (0%)    | 2664 |
| 1 | 0 | _B5 | 0 | 0 | 0 | _E5 | 0 | 1 | _G3 | 0 | 0 | _I6 | 929<br>(23.401%) | 3041<br>(76.599%) | 0 (0%)          | 0 (0%)    | 3970 |
| 1 | 0 | _B5 | 0 | 0 | 0 | _E5 | 0 | 1 | _G3 | 0 | 1 | _I5 | 0 (0%)           | 63<br>(80.769%)   | 15<br>(19.231%) | 0 (0%)    | 78   |
| 1 | 0 | _B5 | 0 | 0 | 0 | _E5 | 0 | 1 | _G3 | 1 | 0 | _I5 | 0 (0%)           | 113<br>(100%)     | 0 (0%)          | 0 (0%)    | 113  |
| 1 | 0 | _B5 | 0 | 0 | 0 | _E5 | 0 | 1 | _G3 | 1 | 0 | _I6 | 0 (0%)           | 95 (100%)         | 0 (0%)          | 0 (0%)    | 95   |
| 1 | 0 | _B5 | 0 | 0 | 0 | _E5 | 0 | 1 | _G3 | 1 | 1 | _I5 | 0 (0%)           | 21<br>(95.455%)   | 1<br>(4.545%)   | 0 (0%)    | 22   |
| 1 | 0 | _B5 | 0 | 0 | 0 | _E5 | 0 | 1 | _G3 | 1 | 1 | _I6 | 0 (0%)           | 0 (0%)            | 118<br>(99.16%) | 1 (0.84%) | 119  |
| 1 | 0 | _B5 | 0 | 0 | 0 | _E5 | 0 | 1 | _G4 | . | 0 | _I5 | 2<br>(0.966%)    | 205<br>(99.034%)  | 0 (0%)          | 0 (0%)    | 207  |
| 1 | 0 | _B5 | 0 | 0 | 0 | _E5 | 0 | 1 | _G4 | . | 0 | _I6 | 46<br>(25.137%)  | 137<br>(74.863%)  | 0 (0%)          | 0 (0%)    | 183  |
| 1 | 0 | _B5 | 0 | 0 | 0 | _E5 | 0 | 1 | _G4 | . | 1 | _I5 | 0 (0%)           | 3 (15%)           | 17 (85%)        | 0 (0%)    | 20   |
| 1 | 0 | _B5 | 0 | 0 | 0 | _E5 | 0 | 1 | _G4 | 0 | 0 | _I5 | 41<br>(2.722%)   | 1465<br>(97.278%) | 0 (0%)          | 0 (0%)    | 1506 |
| 1 | 0 | _B5 | 0 | 0 | 0 | _E5 | 0 | 1 | _G4 | 0 | 0 | _I6 | 325<br>(25.611%) | 944<br>(74.389%)  | 0 (0%)          | 0 (0%)    | 1269 |
| 1 | 0 | _B5 | 0 | 0 | 0 | _E5 | 0 | 1 | _G4 | 0 | 1 | _I5 | 0 (0%)           | 30<br>(35.714%)   | 54<br>(64.286%) | 0 (0%)    | 84   |
| 1 | 0 | _B5 | 0 | 0 | 0 | _E5 | 0 | 1 | _G4 | 1 | 0 | _I5 | 0 (0%)           | 162<br>(100%)     | 0 (0%)          | 0 (0%)    | 162  |
| 1 | 0 | _B5 | 0 | 0 | 0 | _E5 | 0 | 1 | _G4 | 1 | 0 | _I6 | 0 (0%)           | 57 (100%)         | 0 (0%)          | 0 (0%)    | 57   |
| 1 | 0 | _B5 | 0 | 0 | 0 | _E5 | 0 | 1 | _G4 | 1 | 1 | _I5 | 0 (0%)           | 31<br>(81.579%)   | 7<br>(18.421%)  | 0 (0%)    | 38   |
| 1 | 0 | _B5 | 0 | 0 | 0 | _E5 | 0 | 1 | _G4 | 1 | 1 | _I6 | 0 (0%)           | 0 (0%)            | 91 (100%)       | 0 (0%)    | 91   |
| 1 | 0 | _B5 | 0 | 0 | 0 | _E5 | 1 | 0 | _G3 | 0 | 0 | _I5 | 68<br>(66.667%)  | 34<br>(33.333%)   | 0 (0%)          | 0 (0%)    | 102  |
| 1 | 0 | _B5 | 0 | 0 | 0 | _E5 | 1 | 0 | _G3 | 0 | 0 | _I6 | 144<br>(97.959%) | 3<br>(2.041%)     | 0 (0%)          | 0 (0%)    | 147  |

Supplemental material is neither peer-reviewed nor thoroughly edited by CJASN. The authors alone are responsible for the accuracy and presentation of the material.

|   |   |     |   |   |   |     |   |   |     |   |   |     |                       |                  |                 |        |      |
|---|---|-----|---|---|---|-----|---|---|-----|---|---|-----|-----------------------|------------------|-----------------|--------|------|
| 1 | 0 | _B5 | 0 | 0 | 0 | _E5 | 1 | 0 | _G4 | 0 | 0 | _I5 | 141<br>(71.939<br>%)  | 55<br>(28.061%)  | 0 (0%)          | 0 (0%) | 196  |
| 1 | 0 | _B5 | 0 | 0 | 0 | _E5 | 1 | 0 | _G4 | 0 | 0 | _I6 | 156<br>(100%)         | 0 (0%)           | 0 (0%)          | 0 (0%) | 156  |
| 1 | 0 | _B5 | 0 | 0 | 0 | _E5 | 1 | 1 | _G3 | 0 | 0 | _I5 | 0 (0%)                | 96 (100%)        | 0 (0%)          | 0 (0%) | 96   |
| 1 | 0 | _B5 | 0 | 0 | 0 | _E5 | 1 | 1 | _G3 | 0 | 0 | _I6 | 0 (0%)                | 140<br>(100%)    | 0 (0%)          | 0 (0%) | 140  |
| 1 | 0 | _B5 | 0 | 0 | 0 | _E5 | 1 | 1 | _G3 | 0 | 1 | _I5 | 0 (0%)                | 11<br>(52.381%)  | 10<br>(47.619%) | 0 (0%) | 21   |
| 1 | 0 | _B5 | 0 | 0 | 0 | _E5 | 1 | 1 | _G4 | 0 | 0 | _I5 | 0 (0%)                | 83 (100%)        | 0 (0%)          | 0 (0%) | 83   |
| 1 | 0 | _B5 | 0 | 0 | 0 | _E5 | 1 | 1 | _G4 | 0 | 0 | _I6 | 0 (0%)                | 76 (100%)        | 0 (0%)          | 0 (0%) | 76   |
| 1 | 0 | _B5 | 0 | 0 | 0 | _E5 | 1 | 1 | _G4 | 0 | 1 | _I5 | 0 (0%)                | 2<br>(8.696%)    | 21<br>(91.304%) | 0 (0%) | 23   |
| 1 | 0 | _B5 | 0 | 0 | 1 | _E3 | 0 | . | _G3 | . | 0 | _I5 | 0 (0%)                | 37 (100%)        | 0 (0%)          | 0 (0%) | 37   |
| 1 | 0 | _B5 | 0 | 0 | 1 | _E3 | 0 | . | _G3 | . | 0 | _I6 | 0 (0%)                | 42 (100%)        | 0 (0%)          | 0 (0%) | 42   |
| 1 | 0 | _B5 | 0 | 0 | 1 | _E3 | 0 | . | _G4 | . | 0 | _I5 | 0 (0%)                | 42 (100%)        | 0 (0%)          | 0 (0%) | 42   |
| 1 | 0 | _B5 | 0 | 0 | 1 | _E3 | 0 | . | _G4 | . | 0 | _I6 | 0 (0%)                | 42 (100%)        | 0 (0%)          | 0 (0%) | 42   |
| 1 | 0 | _B5 | 0 | 0 | 1 | _E3 | 0 | 0 | _G3 | . | 0 | _I5 | 0 (0%)                | 74 (100%)        | 0 (0%)          | 0 (0%) | 74   |
| 1 | 0 | _B5 | 0 | 0 | 1 | _E3 | 0 | 0 | _G3 | . | 0 | _I6 | 42<br>(50%)           | 42 (50%)         | 0 (0%)          | 0 (0%) | 84   |
| 1 | 0 | _B5 | 0 | 0 | 1 | _E3 | 0 | 0 | _G3 | 0 | 0 | _I5 | 0 (0%)                | 333<br>(100%)    | 0 (0%)          | 0 (0%) | 333  |
| 1 | 0 | _B5 | 0 | 0 | 1 | _E3 | 0 | 0 | _G3 | 0 | 0 | _I6 | 210<br>(55.556<br>%)  | 168<br>(44.444%) | 0 (0%)          | 0 (0%) | 378  |
| 1 | 0 | _B5 | 0 | 0 | 1 | _E3 | 0 | 0 | _G4 | . | 0 | _I5 | 0 (0%)                | 168<br>(100%)    | 0 (0%)          | 0 (0%) | 168  |
| 1 | 0 | _B5 | 0 | 0 | 1 | _E3 | 0 | 0 | _G4 | . | 0 | _I6 | 42<br>(25%)           | 126 (75%)        | 0 (0%)          | 0 (0%) | 168  |
| 1 | 0 | _B5 | 0 | 0 | 1 | _E3 | 0 | 0 | _G4 | 0 | 0 | _I5 | 0 (0%)                | 1764<br>(100%)   | 0 (0%)          | 0 (0%) | 1764 |
| 1 | 0 | _B5 | 0 | 0 | 1 | _E3 | 0 | 0 | _G4 | 0 | 0 | _I6 | 1554<br>(88.095<br>%) | 210<br>(11.905%) | 0 (0%)          | 0 (0%) | 1764 |

|   |   |     |   |   |   |     |   |   |     |   |   |     |        |                |               |        |      |
|---|---|-----|---|---|---|-----|---|---|-----|---|---|-----|--------|----------------|---------------|--------|------|
| 1 | 0 | _B5 | 0 | 0 | 1 | _E3 | 0 | 1 | _G3 | . | 0 | _I5 | 0 (0%) | 296<br>(100%)  | 0 (0%)        | 0 (0%) | 296  |
| 1 | 0 | _B5 | 0 | 0 | 1 | _E3 | 0 | 1 | _G3 | . | 0 | _I6 | 0 (0%) | 378<br>(100%)  | 0 (0%)        | 0 (0%) | 378  |
| 1 | 0 | _B5 | 0 | 0 | 1 | _E3 | 0 | 1 | _G3 | . | 1 | _I5 | 0 (0%) | 0 (0%)         | 37 (100%)     | 0 (0%) | 37   |
| 1 | 0 | _B5 | 0 | 0 | 1 | _E3 | 0 | 1 | _G3 | 0 | 0 | _I5 | 0 (0%) | 2701<br>(100%) | 0 (0%)        | 0 (0%) | 2701 |
| 1 | 0 | _B5 | 0 | 0 | 1 | _E3 | 0 | 1 | _G3 | 0 | 0 | _I6 | 0 (0%) | 3318<br>(100%) | 0 (0%)        | 0 (0%) | 3318 |
| 1 | 0 | _B5 | 0 | 0 | 1 | _E3 | 0 | 1 | _G3 | 0 | 1 | _I5 | 0 (0%) | 0 (0%)         | 222<br>(100%) | 0 (0%) | 222  |
| 1 | 0 | _B5 | 0 | 0 | 1 | _E3 | 0 | 1 | _G3 | 1 | 0 | _I5 | 0 (0%) | 222<br>(100%)  | 0 (0%)        | 0 (0%) | 222  |
| 1 | 0 | _B5 | 0 | 0 | 1 | _E3 | 0 | 1 | _G3 | 1 | 0 | _I6 | 0 (0%) | 126<br>(100%)  | 0 (0%)        | 0 (0%) | 126  |
| 1 | 0 | _B5 | 0 | 0 | 1 | _E3 | 0 | 1 | _G3 | 1 | 1 | _I5 | 0 (0%) | 0 (0%)         | 74 (100%)     | 0 (0%) | 74   |
| 1 | 0 | _B5 | 0 | 0 | 1 | _E3 | 0 | 1 | _G3 | 1 | 1 | _I6 | 0 (0%) | 0 (0%)         | 210<br>(100%) | 0 (0%) | 210  |
| 1 | 0 | _B5 | 0 | 0 | 1 | _E3 | 0 | 1 | _G4 | . | 0 | _I5 | 0 (0%) | 252<br>(100%)  | 0 (0%)        | 0 (0%) | 252  |
| 1 | 0 | _B5 | 0 | 0 | 1 | _E3 | 0 | 1 | _G4 | . | 0 | _I6 | 0 (0%) | 294<br>(100%)  | 0 (0%)        | 0 (0%) | 294  |
| 1 | 0 | _B5 | 0 | 0 | 1 | _E3 | 0 | 1 | _G4 | . | 1 | _I5 | 0 (0%) | 0 (0%)         | 42 (100%)     | 0 (0%) | 42   |
| 1 | 0 | _B5 | 0 | 0 | 1 | _E3 | 0 | 1 | _G4 | 0 | 0 | _I5 | 0 (0%) | 1680<br>(100%) | 0 (0%)        | 0 (0%) | 1680 |
| 1 | 0 | _B5 | 0 | 0 | 1 | _E3 | 0 | 1 | _G4 | 0 | 0 | _I6 | 0 (0%) | 1932<br>(100%) | 0 (0%)        | 0 (0%) | 1932 |
| 1 | 0 | _B5 | 0 | 0 | 1 | _E3 | 0 | 1 | _G4 | 0 | 1 | _I5 | 0 (0%) | 0 (0%)         | 252<br>(100%) | 0 (0%) | 252  |
| 1 | 0 | _B5 | 0 | 0 | 1 | _E3 | 0 | 1 | _G4 | 1 | 0 | _I5 | 0 (0%) | 252<br>(100%)  | 0 (0%)        | 0 (0%) | 252  |
| 1 | 0 | _B5 | 0 | 0 | 1 | _E3 | 0 | 1 | _G4 | 1 | 0 | _I6 | 0 (0%) | 126<br>(100%)  | 0 (0%)        | 0 (0%) | 126  |
| 1 | 0 | _B5 | 0 | 0 | 1 | _E3 | 0 | 1 | _G4 | 1 | 1 | _I5 | 0 (0%) | 0 (0%)         | 84 (100%)     | 0 (0%) | 84   |
| 1 | 0 | _B5 | 0 | 0 | 1 | _E3 | 0 | 1 | _G4 | 1 | 1 | _I6 | 0 (0%) | 0 (0%)         | 210<br>(100%) | 0 (0%) | 210  |
| 1 | 0 | _B5 | 0 | 0 | 1 | _E3 | 1 | 0 | _G4 | . | 0 | _I5 | 0 (0%) | 42 (100%)      | 0 (0%)        | 0 (0%) | 42   |

Supplemental material is neither peer-reviewed nor thoroughly edited by CJASN. The authors alone are responsible for the accuracy and presentation of the material.

|   |   |     |   |   |   |     |   |   |     |   |   |     |              |               |           |        |     |
|---|---|-----|---|---|---|-----|---|---|-----|---|---|-----|--------------|---------------|-----------|--------|-----|
| 1 | 0 | _B5 | 0 | 0 | 1 | _E3 | 1 | 0 | _G4 | . | 0 | _I6 | 0 (0%)       | 42 (100%)     | 0 (0%)    | 0 (0%) | 42  |
| 1 | 0 | _B5 | 0 | 0 | 1 | _E3 | 1 | 1 | _G3 | . | 0 | _I5 | 0 (0%)       | 37 (100%)     | 0 (0%)    | 0 (0%) | 37  |
| 1 | 0 | _B5 | 0 | 0 | 1 | _E3 | 1 | 1 | _G3 | . | 0 | _I6 | 0 (0%)       | 42 (100%)     | 0 (0%)    | 0 (0%) | 42  |
| 1 | 0 | _B5 | 0 | 0 | 1 | _E3 | 1 | 1 | _G3 | 0 | 0 | _I5 | 0 (0%)       | 111 (100%)    | 0 (0%)    | 0 (0%) | 111 |
| 1 | 0 | _B5 | 0 | 0 | 1 | _E3 | 1 | 1 | _G3 | 0 | 0 | _I6 | 0 (0%)       | 168 (100%)    | 0 (0%)    | 0 (0%) | 168 |
| 1 | 0 | _B5 | 0 | 0 | 1 | _E3 | 1 | 1 | _G3 | 0 | 1 | _I5 | 0 (0%)       | 0 (0%)        | 37 (100%) | 0 (0%) | 37  |
| 1 | 0 | _B5 | 0 | 0 | 1 | _E3 | 1 | 1 | _G4 | 0 | 0 | _I5 | 0 (0%)       | 126 (100%)    | 0 (0%)    | 0 (0%) | 126 |
| 1 | 0 | _B5 | 0 | 0 | 1 | _E3 | 1 | 1 | _G4 | 0 | 0 | _I6 | 0 (0%)       | 168 (100%)    | 0 (0%)    | 0 (0%) | 168 |
| 1 | 0 | _B5 | 0 | 0 | 1 | _E3 | 1 | 1 | _G4 | 0 | 1 | _I5 | 0 (0%)       | 0 (0%)        | 42 (100%) | 0 (0%) | 42  |
| 1 | 0 | _B5 | 0 | 0 | 1 | _E4 | 0 | . | _G3 | . | 0 | _I5 | 0 (0%)       | 30 (100%)     | 0 (0%)    | 0 (0%) | 30  |
| 1 | 0 | _B5 | 0 | 0 | 1 | _E4 | 0 | . | _G3 | . | 0 | _I6 | 0 (0%)       | 28 (100%)     | 0 (0%)    | 0 (0%) | 28  |
| 1 | 0 | _B5 | 0 | 0 | 1 | _E4 | 0 | . | _G4 | . | 0 | _I5 | 0 (0%)       | 25 (100%)     | 0 (0%)    | 0 (0%) | 25  |
| 1 | 0 | _B5 | 0 | 0 | 1 | _E4 | 0 | . | _G4 | . | 0 | _I6 | 0 (0%)       | 31 (100%)     | 0 (0%)    | 0 (0%) | 31  |
| 1 | 0 | _B5 | 0 | 0 | 1 | _E4 | 0 | 0 | _G3 | . | 0 | _I5 | 0 (0%)       | 45 (100%)     | 0 (0%)    | 0 (0%) | 45  |
| 1 | 0 | _B5 | 0 | 0 | 1 | _E4 | 0 | 0 | _G3 | . | 0 | _I6 | 38 (100%)    | 0 (0%)        | 0 (0%)    | 0 (0%) | 38  |
| 1 | 0 | _B5 | 0 | 0 | 1 | _E4 | 0 | 0 | _G3 | 0 | 0 | _I5 | 0 (0%)       | 109 (100%)    | 0 (0%)    | 0 (0%) | 109 |
| 1 | 0 | _B5 | 0 | 0 | 1 | _E4 | 0 | 0 | _G3 | 0 | 0 | _I6 | 89 (100%)    | 0 (0%)        | 0 (0%)    | 0 (0%) | 89  |
| 1 | 0 | _B5 | 0 | 0 | 1 | _E4 | 0 | 0 | _G4 | . | 0 | _I5 | 0 (0%)       | 61 (100%)     | 0 (0%)    | 0 (0%) | 61  |
| 1 | 0 | _B5 | 0 | 0 | 1 | _E4 | 0 | 0 | _G4 | . | 0 | _I6 | 21 (26.582%) | 58 (73.418%)  | 0 (0%)    | 0 (0%) | 79  |
| 1 | 0 | _B5 | 0 | 0 | 1 | _E4 | 0 | 0 | _G4 | 0 | 0 | _I5 | 0 (0%)       | 137 (100%)    | 0 (0%)    | 0 (0%) | 137 |
| 1 | 0 | _B5 | 0 | 0 | 1 | _E4 | 0 | 0 | _G4 | 0 | 0 | _I6 | 40 (21.164%) | 149 (78.836%) | 0 (0%)    | 0 (0%) | 189 |

|   |   |     |   |   |   |     |   |   |     |   |   |     |        |               |                 |        |     |
|---|---|-----|---|---|---|-----|---|---|-----|---|---|-----|--------|---------------|-----------------|--------|-----|
| 1 | 0 | _B5 | 0 | 0 | 1 | _E4 | 0 | 1 | _G3 | . | 0 | _I5 | 0 (0%) | 151<br>(100%) | 0 (0%)          | 0 (0%) | 151 |
| 1 | 0 | _B5 | 0 | 0 | 1 | _E4 | 0 | 1 | _G3 | . | 0 | _I6 | 0 (0%) | 151<br>(100%) | 0 (0%)          | 0 (0%) | 151 |
| 1 | 0 | _B5 | 0 | 0 | 1 | _E4 | 0 | 1 | _G3 | . | 1 | _I5 | 0 (0%) | 0 (0%)        | 33 (100%)       | 0 (0%) | 33  |
| 1 | 0 | _B5 | 0 | 0 | 1 | _E4 | 0 | 1 | _G3 | 0 | 0 | _I5 | 0 (0%) | 698<br>(100%) | 0 (0%)          | 0 (0%) | 698 |
| 1 | 0 | _B5 | 0 | 0 | 1 | _E4 | 0 | 1 | _G3 | 0 | 0 | _I6 | 0 (0%) | 739<br>(100%) | 0 (0%)          | 0 (0%) | 739 |
| 1 | 0 | _B5 | 0 | 0 | 1 | _E4 | 0 | 1 | _G3 | 0 | 1 | _I5 | 0 (0%) | 0 (0%)        | 171<br>(100%)   | 0 (0%) | 171 |
| 1 | 0 | _B5 | 0 | 0 | 1 | _E4 | 0 | 1 | _G3 | 1 | 0 | _I5 | 0 (0%) | 122<br>(100%) | 0 (0%)          | 0 (0%) | 122 |
| 1 | 0 | _B5 | 0 | 0 | 1 | _E4 | 0 | 1 | _G3 | 1 | 0 | _I6 | 0 (0%) | 56 (100%)     | 0 (0%)          | 0 (0%) | 56  |
| 1 | 0 | _B5 | 0 | 0 | 1 | _E4 | 0 | 1 | _G3 | 1 | 1 | _I5 | 0 (0%) | 0 (0%)        | 59 (100%)       | 0 (0%) | 59  |
| 1 | 0 | _B5 | 0 | 0 | 1 | _E4 | 0 | 1 | _G3 | 1 | 1 | _I6 | 0 (0%) | 0 (0%)        | 98 (100%)       | 0 (0%) | 98  |
| 1 | 0 | _B5 | 0 | 0 | 1 | _E4 | 0 | 1 | _G4 | . | 0 | _I5 | 0 (0%) | 93 (100%)     | 0 (0%)          | 0 (0%) | 93  |
| 1 | 0 | _B5 | 0 | 0 | 1 | _E4 | 0 | 1 | _G4 | . | 0 | _I6 | 0 (0%) | 157<br>(100%) | 0 (0%)          | 0 (0%) | 157 |
| 1 | 0 | _B5 | 0 | 0 | 1 | _E4 | 0 | 1 | _G4 | . | 1 | _I5 | 0 (0%) | 0 (0%)        | 25 (100%)       | 0 (0%) | 25  |
| 1 | 0 | _B5 | 0 | 0 | 1 | _E4 | 0 | 1 | _G4 | 0 | 0 | _I5 | 0 (0%) | 471<br>(100%) | 0 (0%)          | 0 (0%) | 471 |
| 1 | 0 | _B5 | 0 | 0 | 1 | _E4 | 0 | 1 | _G4 | 0 | 0 | _I6 | 0 (0%) | 822<br>(100%) | 0 (0%)          | 0 (0%) | 822 |
| 1 | 0 | _B5 | 0 | 0 | 1 | _E4 | 0 | 1 | _G4 | 0 | 1 | _I5 | 0 (0%) | 0 (0%)        | 162<br>(100%)   | 0 (0%) | 162 |
| 1 | 0 | _B5 | 0 | 0 | 1 | _E4 | 0 | 1 | _G4 | 1 | 0 | _I5 | 0 (0%) | 89 (100%)     | 0 (0%)          | 0 (0%) | 89  |
| 1 | 0 | _B5 | 0 | 0 | 1 | _E4 | 0 | 1 | _G4 | 1 | 0 | _I6 | 0 (0%) | 54 (100%)     | 0 (0%)          | 0 (0%) | 54  |
| 1 | 0 | _B5 | 0 | 0 | 1 | _E4 | 0 | 1 | _G4 | 1 | 1 | _I5 | 0 (0%) | 1<br>(2.222%) | 44<br>(97.778%) | 0 (0%) | 45  |
| 1 | 0 | _B5 | 0 | 0 | 1 | _E4 | 0 | 1 | _G4 | 1 | 1 | _I6 | 0 (0%) | 0 (0%)        | 126<br>(100%)   | 0 (0%) | 126 |
| 1 | 0 | _B5 | 0 | 0 | 1 | _E4 | 1 | 0 | _G4 | . | 0 | _I5 | 0 (0%) | 36 (100%)     | 0 (0%)          | 0 (0%) | 36  |

|   |   |     |   |   |   |     |   |   |     |   |   |     |                  |                 |           |        |     |
|---|---|-----|---|---|---|-----|---|---|-----|---|---|-----|------------------|-----------------|-----------|--------|-----|
| 1 | 0 | _B5 | 0 | 0 | 1 | _E4 | 1 | 0 | _G4 | . | 0 | _I6 | 0 (0%)           | 47 (100%)       | 0 (0%)    | 0 (0%) | 47  |
| 1 | 0 | _B5 | 0 | 0 | 1 | _E4 | 1 | 1 | _G3 | . | 0 | _I5 | 0 (0%)           | 45 (100%)       | 0 (0%)    | 0 (0%) | 45  |
| 1 | 0 | _B5 | 0 | 0 | 1 | _E4 | 1 | 1 | _G3 | . | 0 | _I6 | 0 (0%)           | 38 (100%)       | 0 (0%)    | 0 (0%) | 38  |
| 1 | 0 | _B5 | 0 | 0 | 1 | _E4 | 1 | 1 | _G3 | 0 | 0 | _I5 | 0 (0%)           | 59 (100%)       | 0 (0%)    | 0 (0%) | 59  |
| 1 | 0 | _B5 | 0 | 0 | 1 | _E4 | 1 | 1 | _G3 | 0 | 0 | _I6 | 0 (0%)           | 71 (100%)       | 0 (0%)    | 0 (0%) | 71  |
| 1 | 0 | _B5 | 0 | 0 | 1 | _E4 | 1 | 1 | _G3 | 0 | 1 | _I5 | 0 (0%)           | 0 (0%)          | 27 (100%) | 0 (0%) | 27  |
| 1 | 0 | _B5 | 0 | 0 | 1 | _E4 | 1 | 1 | _G4 | 0 | 0 | _I5 | 0 (0%)           | 42 (100%)       | 0 (0%)    | 0 (0%) | 42  |
| 1 | 0 | _B5 | 0 | 0 | 1 | _E4 | 1 | 1 | _G4 | 0 | 0 | _I6 | 0 (0%)           | 92 (100%)       | 0 (0%)    | 0 (0%) | 92  |
| 1 | 0 | _B5 | 0 | 0 | 1 | _E4 | 1 | 1 | _G4 | 0 | 1 | _I5 | 0 (0%)           | 0 (0%)          | 28 (100%) | 0 (0%) | 28  |
| 1 | 0 | _B5 | 0 | 0 | 1 | _E5 | 0 | . | _G3 | . | 0 | _I5 | 0 (0%)           | 28 (100%)       | 0 (0%)    | 0 (0%) | 28  |
| 1 | 0 | _B5 | 0 | 0 | 1 | _E5 | 0 | . | _G3 | . | 0 | _I6 | 0 (0%)           | 26 (100%)       | 0 (0%)    | 0 (0%) | 26  |
| 1 | 0 | _B5 | 0 | 0 | 1 | _E5 | 0 | . | _G4 | . | 0 | _I5 | 0 (0%)           | 29 (100%)       | 0 (0%)    | 0 (0%) | 29  |
| 1 | 0 | _B5 | 0 | 0 | 1 | _E5 | 0 | . | _G4 | . | 0 | _I6 | 0 (0%)           | 27 (100%)       | 0 (0%)    | 0 (0%) | 27  |
| 1 | 0 | _B5 | 0 | 0 | 1 | _E5 | 0 | 0 | _G3 | . | 0 | _I5 | 0 (0%)           | 34 (100%)       | 0 (0%)    | 0 (0%) | 34  |
| 1 | 0 | _B5 | 0 | 0 | 1 | _E5 | 0 | 0 | _G3 | . | 0 | _I6 | 48<br>(97.959%)  | 1<br>(2.041%)   | 0 (0%)    | 0 (0%) | 49  |
| 1 | 0 | _B5 | 0 | 0 | 1 | _E5 | 0 | 0 | _G3 | 0 | 0 | _I5 | 0 (0%)           | 75 (100%)       | 0 (0%)    | 0 (0%) | 75  |
| 1 | 0 | _B5 | 0 | 0 | 1 | _E5 | 0 | 0 | _G3 | 0 | 0 | _I6 | 106<br>(98.148%) | 2<br>(1.852%)   | 0 (0%)    | 0 (0%) | 108 |
| 1 | 0 | _B5 | 0 | 0 | 1 | _E5 | 0 | 0 | _G4 | . | 0 | _I5 | 0 (0%)           | 82 (100%)       | 0 (0%)    | 0 (0%) | 82  |
| 1 | 0 | _B5 | 0 | 0 | 1 | _E5 | 0 | 0 | _G4 | . | 0 | _I6 | 21<br>(32.813%)  | 43<br>(67.188%) | 0 (0%)    | 0 (0%) | 64  |
| 1 | 0 | _B5 | 0 | 0 | 1 | _E5 | 0 | 0 | _G4 | 0 | 0 | _I5 | 0 (0%)           | 201<br>(100%)   | 0 (0%)    | 0 (0%) | 201 |

Supplemental material is neither peer-reviewed nor thoroughly edited by CJASN. The authors alone are responsible for the accuracy and presentation of the material.

|   |   |     |   |   |   |     |   |   |     |   |   |     |                 |                  |                  |               |     |
|---|---|-----|---|---|---|-----|---|---|-----|---|---|-----|-----------------|------------------|------------------|---------------|-----|
| 1 | 0 | _B5 | 0 | 0 | 1 | _E5 | 0 | 0 | _G4 | 0 | 0 | _I6 | 52<br>(35.374%) | 95<br>(64.626%)  | 0 (0%)           | 0 (0%)        | 147 |
| 1 | 0 | _B5 | 0 | 0 | 1 | _E5 | 0 | 1 | _G3 | . | 0 | _I5 | 0 (0%)          | 110<br>(100%)    | 0 (0%)           | 0 (0%)        | 110 |
| 1 | 0 | _B5 | 0 | 0 | 1 | _E5 | 0 | 1 | _G3 | . | 0 | _I6 | 0 (0%)          | 184<br>(97.354%) | 5<br>(2.646%)    | 0 (0%)        | 189 |
| 1 | 0 | _B5 | 0 | 0 | 1 | _E5 | 0 | 1 | _G3 | . | 1 | _I5 | 0 (0%)          | 0 (0%)           | 21 (100%)        | 0 (0%)        | 21  |
| 1 | 0 | _B5 | 0 | 0 | 1 | _E5 | 0 | 1 | _G3 | 0 | 0 | _I5 | 0 (0%)          | 532<br>(100%)    | 0 (0%)           | 0 (0%)        | 532 |
| 1 | 0 | _B5 | 0 | 0 | 1 | _E5 | 0 | 1 | _G3 | 0 | 0 | _I6 | 0 (0%)          | 915<br>(98.387%) | 15<br>(1.613%)   | 0 (0%)        | 930 |
| 1 | 0 | _B5 | 0 | 0 | 1 | _E5 | 0 | 1 | _G3 | 0 | 1 | _I5 | 0 (0%)          | 3<br>(2.381%)    | 123<br>(97.619%) | 0 (0%)        | 126 |
| 1 | 0 | _B5 | 0 | 0 | 1 | _E5 | 0 | 1 | _G3 | 1 | 0 | _I5 | 0 (0%)          | 91 (100%)        | 0 (0%)           | 0 (0%)        | 91  |
| 1 | 0 | _B5 | 0 | 0 | 1 | _E5 | 0 | 1 | _G3 | 1 | 0 | _I6 | 0 (0%)          | 51<br>(98.077%)  | 1<br>(1.923%)    | 0 (0%)        | 52  |
| 1 | 0 | _B5 | 0 | 0 | 1 | _E5 | 0 | 1 | _G3 | 1 | 1 | _I5 | 0 (0%)          | 0 (0%)           | 46 (100%)        | 0 (0%)        | 46  |
| 1 | 0 | _B5 | 0 | 0 | 1 | _E5 | 0 | 1 | _G3 | 1 | 1 | _I6 | 0 (0%)          | 0 (0%)           | 122<br>(96.825%) | 4<br>(3.175%) | 126 |
| 1 | 0 | _B5 | 0 | 0 | 1 | _E5 | 0 | 1 | _G4 | . | 0 | _I5 | 0 (0%)          | 136<br>(100%)    | 0 (0%)           | 0 (0%)        | 136 |
| 1 | 0 | _B5 | 0 | 0 | 1 | _E5 | 0 | 1 | _G4 | . | 0 | _I6 | 0 (0%)          | 129<br>(100%)    | 0 (0%)           | 0 (0%)        | 129 |
| 1 | 0 | _B5 | 0 | 0 | 1 | _E5 | 0 | 1 | _G4 | . | 1 | _I5 | 0 (0%)          | 0 (0%)           | 29 (100%)        | 0 (0%)        | 29  |
| 1 | 0 | _B5 | 0 | 0 | 1 | _E5 | 0 | 1 | _G4 | 0 | 0 | _I5 | 0 (0%)          | 650<br>(100%)    | 0 (0%)           | 0 (0%)        | 650 |
| 1 | 0 | _B5 | 0 | 0 | 1 | _E5 | 0 | 1 | _G4 | 0 | 0 | _I6 | 0 (0%)          | 681<br>(100%)    | 0 (0%)           | 0 (0%)        | 681 |
| 1 | 0 | _B5 | 0 | 0 | 1 | _E5 | 0 | 1 | _G4 | 0 | 1 | _I5 | 0 (0%)          | 0 (0%)           | 210<br>(100%)    | 0 (0%)        | 210 |
| 1 | 0 | _B5 | 0 | 0 | 1 | _E5 | 0 | 1 | _G4 | 1 | 0 | _I5 | 0 (0%)          | 132<br>(100%)    | 0 (0%)           | 0 (0%)        | 132 |
| 1 | 0 | _B5 | 0 | 0 | 1 | _E5 | 0 | 1 | _G4 | 1 | 0 | _I6 | 0 (0%)          | 60 (100%)        | 0 (0%)           | 0 (0%)        | 60  |
| 1 | 0 | _B5 | 0 | 0 | 1 | _E5 | 0 | 1 | _G4 | 1 | 1 | _I5 | 0 (0%)          | 2<br>(3.333%)    | 58<br>(96.667%)  | 0 (0%)        | 60  |
| 1 | 0 | _B5 | 0 | 0 | 1 | _E5 | 0 | 1 | _G4 | 1 | 1 | _I6 | 0 (0%)          | 0 (0%)           | 104<br>(100%)    | 0 (0%)        | 104 |

|   |   |     |   |   |   |     |   |   |     |   |   |     |                     |                  |                |        |     |
|---|---|-----|---|---|---|-----|---|---|-----|---|---|-----|---------------------|------------------|----------------|--------|-----|
| 1 | 0 | _B5 | 0 | 0 | 1 | _E5 | 1 | 0 | _G4 | . | 0 | _I5 | 0 (0%)              | 49 (100%)        | 0 (0%)         | 0 (0%) | 49  |
| 1 | 0 | _B5 | 0 | 0 | 1 | _E5 | 1 | 0 | _G4 | . | 0 | _I6 | 0 (0%)              | 39 (100%)        | 0 (0%)         | 0 (0%) | 39  |
| 1 | 0 | _B5 | 0 | 0 | 1 | _E5 | 1 | 1 | _G3 | . | 0 | _I5 | 0 (0%)              | 34 (100%)        | 0 (0%)         | 0 (0%) | 34  |
| 1 | 0 | _B5 | 0 | 0 | 1 | _E5 | 1 | 1 | _G3 | . | 0 | _I6 | 0 (0%)              | 48<br>(97.959%)  | 1<br>(2.041%)  | 0 (0%) | 49  |
| 1 | 0 | _B5 | 0 | 0 | 1 | _E5 | 1 | 1 | _G3 | 0 | 0 | _I5 | 0 (0%)              | 40 (100%)        | 0 (0%)         | 0 (0%) | 40  |
| 1 | 0 | _B5 | 0 | 0 | 1 | _E5 | 1 | 1 | _G3 | 0 | 0 | _I6 | 0 (0%)              | 104<br>(99.048%) | 1<br>(0.952%)  | 0 (0%) | 105 |
| 1 | 0 | _B5 | 0 | 0 | 1 | _E5 | 1 | 1 | _G3 | 0 | 1 | _I5 | 0 (0%)              | 0 (0%)           | 13 (100%)      | 0 (0%) | 13  |
| 1 | 0 | _B5 | 0 | 0 | 1 | _E5 | 1 | 1 | _G4 | 0 | 0 | _I5 | 0 (0%)              | 64 (100%)        | 0 (0%)         | 0 (0%) | 64  |
| 1 | 0 | _B5 | 0 | 0 | 1 | _E5 | 1 | 1 | _G4 | 0 | 0 | _I6 | 0 (0%)              | 80 (100%)        | 0 (0%)         | 0 (0%) | 80  |
| 1 | 0 | _B5 | 0 | 0 | 1 | _E5 | 1 | 1 | _G4 | 0 | 1 | _I5 | 0 (0%)              | 0 (0%)           | 26 (100%)      | 0 (0%) | 26  |
| 1 | 0 | _B5 | 0 | 1 | 0 | _E4 | 0 | 0 | _G3 | 0 | 0 | _I5 | 41<br>(91.111<br>%) | 4<br>(8.889%)    | 0 (0%)         | 0 (0%) | 45  |
| 1 | 0 | _B5 | 0 | 1 | 0 | _E4 | 0 | 0 | _G3 | 0 | 0 | _I6 | 38<br>(100%)        | 0 (0%)           | 0 (0%)         | 0 (0%) | 38  |
| 1 | 0 | _B5 | 0 | 1 | 0 | _E4 | 0 | 0 | _G4 | 0 | 0 | _I5 | 78<br>(92.857<br>%) | 6<br>(7.143%)    | 0 (0%)         | 0 (0%) | 84  |
| 1 | 0 | _B5 | 0 | 1 | 0 | _E4 | 0 | 0 | _G4 | 0 | 0 | _I6 | 113<br>(100%)       | 0 (0%)           | 0 (0%)         | 0 (0%) | 113 |
| 1 | 0 | _B5 | 0 | 1 | 0 | _E4 | 0 | 1 | _G3 | . | 0 | _I5 | 0 (0%)              | 45 (100%)        | 0 (0%)         | 0 (0%) | 45  |
| 1 | 0 | _B5 | 0 | 1 | 0 | _E4 | 0 | 1 | _G3 | . | 0 | _I6 | 0 (0%)              | 38 (100%)        | 0 (0%)         | 0 (0%) | 38  |
| 1 | 0 | _B5 | 0 | 1 | 0 | _E4 | 0 | 1 | _G3 | 0 | 0 | _I5 | 0 (0%)              | 167<br>(100%)    | 0 (0%)         | 0 (0%) | 167 |
| 1 | 0 | _B5 | 0 | 1 | 0 | _E4 | 0 | 1 | _G3 | 0 | 0 | _I6 | 0 (0%)              | 157<br>(100%)    | 0 (0%)         | 0 (0%) | 157 |
| 1 | 0 | _B5 | 0 | 1 | 0 | _E4 | 0 | 1 | _G3 | 0 | 1 | _I5 | 0 (0%)              | 1 (3.03%)        | 32<br>(96.97%) | 0 (0%) | 33  |
| 1 | 0 | _B5 | 0 | 1 | 0 | _E4 | 0 | 1 | _G4 | . | 0 | _I5 | 0 (0%)              | 36 (100%)        | 0 (0%)         | 0 (0%) | 36  |
| 1 | 0 | _B5 | 0 | 1 | 0 | _E4 | 0 | 1 | _G4 | . | 0 | _I6 | 0 (0%)              | 47 (100%)        | 0 (0%)         | 0 (0%) | 47  |

Supplemental material is neither peer-reviewed nor thoroughly edited by CJASN. The authors alone are responsible for the accuracy and presentation of the material.

|   |   |     |   |   |   |     |   |   |     |   |   |     |               |             |              |        |     |
|---|---|-----|---|---|---|-----|---|---|-----|---|---|-----|---------------|-------------|--------------|--------|-----|
| 1 | 0 | _B5 | 0 | 1 | 0 | _E4 | 0 | 1 | _G4 | 0 | 0 | _I5 | 0 (0%)        | 82 (100%)   | 0 (0%)       | 0 (0%) | 82  |
| 1 | 0 | _B5 | 0 | 1 | 0 | _E4 | 0 | 1 | _G4 | 0 | 0 | _I6 | 0 (0%)        | 146 (100%)  | 0 (0%)       | 0 (0%) | 146 |
| 1 | 0 | _B5 | 0 | 1 | 0 | _E4 | 0 | 1 | _G4 | 0 | 1 | _I5 | 0 (0%)        | 0 (0%)      | 26 (100%)    | 0 (0%) | 26  |
| 1 | 0 | _B5 | 0 | 1 | 0 | _E5 | 0 | 0 | _G3 | 0 | 0 | _I5 | 31 (91.176%)  | 3 (8.824%)  | 0 (0%)       | 0 (0%) | 34  |
| 1 | 0 | _B5 | 0 | 1 | 0 | _E5 | 0 | 0 | _G3 | 0 | 0 | _I6 | 48 (97.959%)  | 1 (2.041%)  | 0 (0%)       | 0 (0%) | 49  |
| 1 | 0 | _B5 | 0 | 1 | 0 | _E5 | 0 | 0 | _G4 | 0 | 0 | _I5 | 111 (99.107%) | 1 (0.893%)  | 0 (0%)       | 0 (0%) | 112 |
| 1 | 0 | _B5 | 0 | 1 | 0 | _E5 | 0 | 0 | _G4 | 0 | 0 | _I6 | 91 (100%)     | 0 (0%)      | 0 (0%)       | 0 (0%) | 91  |
| 1 | 0 | _B5 | 0 | 1 | 0 | _E5 | 0 | 1 | _G3 | . | 0 | _I5 | 0 (0%)        | 34 (100%)   | 0 (0%)       | 0 (0%) | 34  |
| 1 | 0 | _B5 | 0 | 1 | 0 | _E5 | 0 | 1 | _G3 | . | 0 | _I6 | 0 (0%)        | 49 (100%)   | 0 (0%)       | 0 (0%) | 49  |
| 1 | 0 | _B5 | 0 | 1 | 0 | _E5 | 0 | 1 | _G3 | 0 | 0 | _I5 | 0 (0%)        | 126 (100%)  | 0 (0%)       | 0 (0%) | 126 |
| 1 | 0 | _B5 | 0 | 1 | 0 | _E5 | 0 | 1 | _G3 | 0 | 0 | _I6 | 0 (0%)        | 212 (100%)  | 0 (0%)       | 0 (0%) | 212 |
| 1 | 0 | _B5 | 0 | 1 | 0 | _E5 | 0 | 1 | _G3 | 0 | 1 | _I5 | 0 (0%)        | 3 (13.636%) | 19 (86.364%) | 0 (0%) | 22  |
| 1 | 0 | _B5 | 0 | 1 | 0 | _E5 | 0 | 1 | _G4 | . | 0 | _I5 | 0 (0%)        | 49 (100%)   | 0 (0%)       | 0 (0%) | 49  |
| 1 | 0 | _B5 | 0 | 1 | 0 | _E5 | 0 | 1 | _G4 | . | 0 | _I6 | 0 (0%)        | 39 (100%)   | 0 (0%)       | 0 (0%) | 39  |
| 1 | 0 | _B5 | 0 | 1 | 0 | _E5 | 0 | 1 | _G4 | 0 | 0 | _I5 | 0 (0%)        | 112 (100%)  | 0 (0%)       | 0 (0%) | 112 |
| 1 | 0 | _B5 | 0 | 1 | 0 | _E5 | 0 | 1 | _G4 | 0 | 0 | _I6 | 0 (0%)        | 121 (100%)  | 0 (0%)       | 0 (0%) | 121 |
| 1 | 0 | _B5 | 0 | 1 | 0 | _E5 | 0 | 1 | _G4 | 0 | 1 | _I5 | 0 (0%)        | 0 (0%)      | 37 (100%)    | 0 (0%) | 37  |
| 1 | 0 | _B5 | 0 | 1 | 1 | _E3 | 0 | 0 | _G3 | 0 | 0 | _I5 | 0 (0%)        | 37 (100%)   | 0 (0%)       | 0 (0%) | 37  |
| 1 | 0 | _B5 | 0 | 1 | 1 | _E3 | 0 | 0 | _G3 | 0 | 0 | _I6 | 0 (0%)        | 42 (100%)   | 0 (0%)       | 0 (0%) | 42  |
| 1 | 0 | _B5 | 0 | 1 | 1 | _E3 | 0 | 0 | _G4 | 0 | 0 | _I5 | 0 (0%)        | 126 (100%)  | 0 (0%)       | 0 (0%) | 126 |

Supplemental material is neither peer-reviewed nor thoroughly edited by CJASN. The authors alone are responsible for the accuracy and presentation of the material.

|   |   |     |   |   |   |     |   |   |     |   |   |     |        |            |           |        |     |
|---|---|-----|---|---|---|-----|---|---|-----|---|---|-----|--------|------------|-----------|--------|-----|
| 1 | 0 | _B5 | 0 | 1 | 1 | _E3 | 0 | 0 | _G4 | 0 | 0 | _I6 | 0 (0%) | 126 (100%) | 0 (0%)    | 0 (0%) | 126 |
| 1 | 0 | _B5 | 0 | 1 | 1 | _E3 | 0 | 1 | _G3 | . | 0 | _I5 | 0 (0%) | 37 (100%)  | 0 (0%)    | 0 (0%) | 37  |
| 1 | 0 | _B5 | 0 | 1 | 1 | _E3 | 0 | 1 | _G3 | . | 0 | _I6 | 0 (0%) | 42 (100%)  | 0 (0%)    | 0 (0%) | 42  |
| 1 | 0 | _B5 | 0 | 1 | 1 | _E3 | 0 | 1 | _G3 | 0 | 0 | _I5 | 0 (0%) | 185 (100%) | 0 (0%)    | 0 (0%) | 185 |
| 1 | 0 | _B5 | 0 | 1 | 1 | _E3 | 0 | 1 | _G3 | 0 | 0 | _I6 | 0 (0%) | 294 (100%) | 0 (0%)    | 0 (0%) | 294 |
| 1 | 0 | _B5 | 0 | 1 | 1 | _E3 | 0 | 1 | _G3 | 0 | 1 | _I5 | 0 (0%) | 0 (0%)     | 74 (100%) | 0 (0%) | 74  |
| 1 | 0 | _B5 | 0 | 1 | 1 | _E3 | 0 | 1 | _G4 | . | 0 | _I5 | 0 (0%) | 42 (100%)  | 0 (0%)    | 0 (0%) | 42  |
| 1 | 0 | _B5 | 0 | 1 | 1 | _E3 | 0 | 1 | _G4 | . | 0 | _I6 | 0 (0%) | 42 (100%)  | 0 (0%)    | 0 (0%) | 42  |
| 1 | 0 | _B5 | 0 | 1 | 1 | _E3 | 0 | 1 | _G4 | 0 | 0 | _I5 | 0 (0%) | 126 (100%) | 0 (0%)    | 0 (0%) | 126 |
| 1 | 0 | _B5 | 0 | 1 | 1 | _E3 | 0 | 1 | _G4 | 0 | 0 | _I6 | 0 (0%) | 210 (100%) | 0 (0%)    | 0 (0%) | 210 |
| 1 | 0 | _B5 | 0 | 1 | 1 | _E3 | 0 | 1 | _G4 | 0 | 1 | _I5 | 0 (0%) | 0 (0%)     | 84 (100%) | 0 (0%) | 84  |
| 1 | 0 | _B5 | 0 | 1 | 1 | _E3 | 1 | 0 | _G4 | 0 | 0 | _I5 | 0 (0%) | 42 (100%)  | 0 (0%)    | 0 (0%) | 42  |
| 1 | 0 | _B5 | 0 | 1 | 1 | _E3 | 1 | 0 | _G4 | 0 | 0 | _I6 | 0 (0%) | 42 (100%)  | 0 (0%)    | 0 (0%) | 42  |
| 1 | 0 | _B5 | 0 | 1 | 1 | _E3 | 1 | 1 | _G3 | 0 | 0 | _I5 | 0 (0%) | 37 (100%)  | 0 (0%)    | 0 (0%) | 37  |
| 1 | 0 | _B5 | 0 | 1 | 1 | _E3 | 1 | 1 | _G3 | 0 | 0 | _I6 | 0 (0%) | 42 (100%)  | 0 (0%)    | 0 (0%) | 42  |
| 1 | 0 | _B5 | 0 | 1 | 1 | _E4 | 0 | 0 | _G4 | 0 | 0 | _I5 | 0 (0%) | 24 (100%)  | 0 (0%)    | 0 (0%) | 24  |
| 1 | 0 | _B5 | 0 | 1 | 1 | _E4 | 0 | 0 | _G4 | 0 | 0 | _I6 | 0 (0%) | 28 (100%)  | 0 (0%)    | 0 (0%) | 28  |
| 1 | 0 | _B5 | 0 | 1 | 1 | _E4 | 0 | 1 | _G3 | 0 | 0 | _I5 | 0 (0%) | 58 (100%)  | 0 (0%)    | 0 (0%) | 58  |
| 1 | 0 | _B5 | 0 | 1 | 1 | _E4 | 0 | 1 | _G3 | 0 | 0 | _I6 | 0 (0%) | 109 (100%) | 0 (0%)    | 0 (0%) | 109 |
| 1 | 0 | _B5 | 0 | 1 | 1 | _E4 | 0 | 1 | _G3 | 0 | 1 | _I5 | 0 (0%) | 0 (0%)     | 57 (100%) | 0 (0%) | 57  |
| 1 | 0 | _B5 | 0 | 1 | 1 | _E4 | 0 | 1 | _G4 | 0 | 0 | _I5 | 0 (0%) | 26 (100%)  | 0 (0%)    | 0 (0%) | 26  |

Supplemental material is neither peer-reviewed nor thoroughly edited by CJASN. The authors alone are responsible for the accuracy and presentation of the material.

|   |   |     |   |   |   |     |   |   |     |   |   |     |           |               |            |        |     |
|---|---|-----|---|---|---|-----|---|---|-----|---|---|-----|-----------|---------------|------------|--------|-----|
| 1 | 0 | _B5 | 0 | 1 | 1 | _E4 | 0 | 1 | _G4 | 0 | 0 | _I6 | 0 (0%)    | 89 (100%)     | 0 (0%)     | 0 (0%) | 89  |
| 1 | 0 | _B5 | 0 | 1 | 1 | _E4 | 0 | 1 | _G4 | 0 | 1 | _I5 | 0 (0%)    | 0 (0%)        | 46 (100%)  | 0 (0%) | 46  |
| 1 | 0 | _B5 | 0 | 1 | 1 | _E4 | 1 | 0 | _G4 | 0 | 0 | _I5 | 0 (0%)    | 36 (100%)     | 0 (0%)     | 0 (0%) | 36  |
| 1 | 0 | _B5 | 0 | 1 | 1 | _E4 | 1 | 0 | _G4 | 0 | 0 | _I6 | 0 (0%)    | 47 (100%)     | 0 (0%)     | 0 (0%) | 47  |
| 1 | 0 | _B5 | 0 | 1 | 1 | _E4 | 1 | 1 | _G3 | 0 | 0 | _I5 | 0 (0%)    | 45 (100%)     | 0 (0%)     | 0 (0%) | 45  |
| 1 | 0 | _B5 | 0 | 1 | 1 | _E4 | 1 | 1 | _G3 | 0 | 0 | _I6 | 0 (0%)    | 38 (100%)     | 0 (0%)     | 0 (0%) | 38  |
| 1 | 0 | _B5 | 0 | 1 | 1 | _E5 | 0 | 0 | _G4 | 0 | 0 | _I5 | 0 (0%)    | 35 (100%)     | 0 (0%)     | 0 (0%) | 35  |
| 1 | 0 | _B5 | 0 | 1 | 1 | _E5 | 0 | 0 | _G4 | 0 | 0 | _I6 | 0 (0%)    | 26 (100%)     | 0 (0%)     | 0 (0%) | 26  |
| 1 | 0 | _B5 | 0 | 1 | 1 | _E5 | 0 | 1 | _G3 | 0 | 0 | _I5 | 0 (0%)    | 44 (100%)     | 0 (0%)     | 0 (0%) | 44  |
| 1 | 0 | _B5 | 0 | 1 | 1 | _E5 | 0 | 1 | _G3 | 0 | 0 | _I6 | 0 (0%)    | 129 (98.473%) | 2 (1.527%) | 0 (0%) | 131 |
| 1 | 0 | _B5 | 0 | 1 | 1 | _E5 | 0 | 1 | _G3 | 0 | 1 | _I5 | 0 (0%)    | 0 (0%)        | 46 (100%)  | 0 (0%) | 46  |
| 1 | 0 | _B5 | 0 | 1 | 1 | _E5 | 0 | 1 | _G4 | 0 | 0 | _I5 | 0 (0%)    | 35 (100%)     | 0 (0%)     | 0 (0%) | 35  |
| 1 | 0 | _B5 | 0 | 1 | 1 | _E5 | 0 | 1 | _G4 | 0 | 0 | _I6 | 0 (0%)    | 74 (100%)     | 0 (0%)     | 0 (0%) | 74  |
| 1 | 0 | _B5 | 0 | 1 | 1 | _E5 | 0 | 1 | _G4 | 0 | 1 | _I5 | 0 (0%)    | 0 (0%)        | 61 (100%)  | 0 (0%) | 61  |
| 1 | 0 | _B5 | 0 | 1 | 1 | _E5 | 1 | 0 | _G4 | 0 | 0 | _I5 | 0 (0%)    | 49 (100%)     | 0 (0%)     | 0 (0%) | 49  |
| 1 | 0 | _B5 | 0 | 1 | 1 | _E5 | 1 | 0 | _G4 | 0 | 0 | _I6 | 0 (0%)    | 39 (100%)     | 0 (0%)     | 0 (0%) | 39  |
| 1 | 0 | _B5 | 0 | 1 | 1 | _E5 | 1 | 1 | _G3 | 0 | 0 | _I5 | 0 (0%)    | 34 (100%)     | 0 (0%)     | 0 (0%) | 34  |
| 1 | 0 | _B5 | 0 | 1 | 1 | _E5 | 1 | 1 | _G3 | 0 | 0 | _I6 | 0 (0%)    | 48 (97.959%)  | 1 (2.041%) | 0 (0%) | 49  |
| 1 | 0 | _B5 | 1 | . | 0 | _E3 | 0 | 0 | _G3 | 0 | 0 | _I5 | 37 (100%) | 0 (0%)        | 0 (0%)     | 0 (0%) | 37  |
| 1 | 0 | _B5 | 1 | . | 0 | _E3 | 0 | 0 | _G3 | 0 | 0 | _I6 | 42 (100%) | 0 (0%)        | 0 (0%)     | 0 (0%) | 42  |
| 1 | 0 | _B5 | 1 | . | 0 | _E3 | 0 | 0 | _G4 | 0 | 0 | _I5 | 42 (100%) | 0 (0%)        | 0 (0%)     | 0 (0%) | 42  |

|   |   |     |   |   |   |     |   |   |     |   |   |     |                     |                 |                |           |    |
|---|---|-----|---|---|---|-----|---|---|-----|---|---|-----|---------------------|-----------------|----------------|-----------|----|
| 1 | 0 | _B5 | 1 | . | 0 | _E3 | 0 | 0 | _G4 | 0 | 0 | _I6 | 42<br>(100%)        | 0 (0%)          | 0 (0%)         | 0 (0%)    | 42 |
| 1 | 0 | _B5 | 1 | . | 0 | _E4 | 0 | 0 | _G3 | 0 | 0 | _I5 | 45<br>(100%)        | 0 (0%)          | 0 (0%)         | 0 (0%)    | 45 |
| 1 | 0 | _B5 | 1 | . | 0 | _E4 | 0 | 0 | _G3 | 0 | 0 | _I6 | 38<br>(100%)        | 0 (0%)          | 0 (0%)         | 0 (0%)    | 38 |
| 1 | 0 | _B5 | 1 | . | 0 | _E4 | 0 | 0 | _G4 | 0 | 0 | _I5 | 6<br>(16.667<br>%)  | 30<br>(83.333%) | 0 (0%)         | 0 (0%)    | 36 |
| 1 | 0 | _B5 | 1 | . | 0 | _E4 | 0 | 0 | _G4 | 0 | 0 | _I6 | 47<br>(100%)        | 0 (0%)          | 0 (0%)         | 0 (0%)    | 47 |
| 1 | 0 | _B5 | 1 | . | 0 | _E4 | 1 | 1 | _G3 | 1 | 0 | _I5 | 0 (0%)              | 45 (100%)       | 0 (0%)         | 0 (0%)    | 45 |
| 1 | 0 | _B5 | 1 | . | 0 | _E4 | 1 | 1 | _G3 | 1 | 1 | _I5 | 0 (0%)              | 0 (0%)          | 0 (0%)         | 30 (100%) | 30 |
| 1 | 0 | _B5 | 1 | . | 0 | _E4 | 1 | 1 | _G3 | 1 | 1 | _I6 | 0 (0%)              | 0 (0%)          | 63 (100%)      | 0 (0%)    | 63 |
| 1 | 0 | _B5 | 1 | . | 0 | _E4 | 1 | 1 | _G4 | 1 | 0 | _I5 | 0 (0%)              | 36 (100%)       | 0 (0%)         | 0 (0%)    | 36 |
| 1 | 0 | _B5 | 1 | . | 0 | _E4 | 1 | 1 | _G4 | 1 | 1 | _I5 | 0 (0%)              | 0 (0%)          | 0 (0%)         | 21 (100%) | 21 |
| 1 | 0 | _B5 | 1 | . | 0 | _E4 | 1 | 1 | _G4 | 1 | 1 | _I6 | 0 (0%)              | 0 (0%)          | 80 (100%)      | 0 (0%)    | 80 |
| 1 | 0 | _B5 | 1 | . | 0 | _E5 | 0 | 0 | _G3 | 0 | 0 | _I5 | 34<br>(100%)        | 0 (0%)          | 0 (0%)         | 0 (0%)    | 34 |
| 1 | 0 | _B5 | 1 | . | 0 | _E5 | 0 | 0 | _G3 | 0 | 0 | _I6 | 49<br>(100%)        | 0 (0%)          | 0 (0%)         | 0 (0%)    | 49 |
| 1 | 0 | _B5 | 1 | . | 0 | _E5 | 0 | 0 | _G4 | 0 | 0 | _I5 | 19<br>(38.776<br>%) | 30<br>(61.224%) | 0 (0%)         | 0 (0%)    | 49 |
| 1 | 0 | _B5 | 1 | . | 0 | _E5 | 0 | 0 | _G4 | 0 | 0 | _I6 | 39<br>(100%)        | 0 (0%)          | 0 (0%)         | 0 (0%)    | 39 |
| 1 | 0 | _B5 | 1 | . | 0 | _E5 | 1 | 1 | _G3 | 1 | 0 | _I5 | 0 (0%)              | 34 (100%)       | 0 (0%)         | 0 (0%)    | 34 |
| 1 | 0 | _B5 | 1 | . | 0 | _E5 | 1 | 1 | _G3 | 1 | 1 | _I5 | 0 (0%)              | 0 (0%)          | 0 (0%)         | 22 (100%) | 22 |
| 1 | 0 | _B5 | 1 | . | 0 | _E5 | 1 | 1 | _G3 | 1 | 1 | _I6 | 0 (0%)              | 0 (0%)          | 83<br>(98.81%) | 1 (1.19%) | 84 |
| 1 | 0 | _B5 | 1 | . | 0 | _E5 | 1 | 1 | _G4 | 1 | 0 | _I5 | 0 (0%)              | 49 (100%)       | 0 (0%)         | 0 (0%)    | 49 |
| 1 | 0 | _B5 | 1 | . | 0 | _E5 | 1 | 1 | _G4 | 1 | 1 | _I5 | 0 (0%)              | 0 (0%)          | 0 (0%)         | 34 (100%) | 34 |
| 1 | 0 | _B5 | 1 | . | 0 | _E5 | 1 | 1 | _G4 | 1 | 1 | _I6 | 0 (0%)              | 0 (0%)          | 67 (100%)      | 0 (0%)    | 67 |

|   |   |     |   |   |   |     |   |   |     |   |   |     |           |           |              |              |     |
|---|---|-----|---|---|---|-----|---|---|-----|---|---|-----|-----------|-----------|--------------|--------------|-----|
| 1 | 0 | _B5 | 1 | . | 1 | _E3 | 1 | 1 | _G3 | 1 | 0 | _I5 | 0 (0%)    | 0 (0%)    | 0 (0%)       | 37 (100%)    | 37  |
| 1 | 0 | _B5 | 1 | . | 1 | _E3 | 1 | 1 | _G3 | 1 | 1 | _I5 | 0 (0%)    | 0 (0%)    | 0 (0%)       | 74 (100%)    | 74  |
| 1 | 0 | _B5 | 1 | . | 1 | _E3 | 1 | 1 | _G3 | 1 | 1 | _I6 | 0 (0%)    | 0 (0%)    | 126 (100%)   | 0 (0%)       | 126 |
| 1 | 0 | _B5 | 1 | . | 1 | _E3 | 1 | 1 | _G4 | 1 | 0 | _I5 | 0 (0%)    | 0 (0%)    | 0 (0%)       | 42 (100%)    | 42  |
| 1 | 0 | _B5 | 1 | . | 1 | _E3 | 1 | 1 | _G4 | 1 | 1 | _I5 | 0 (0%)    | 0 (0%)    | 0 (0%)       | 84 (100%)    | 84  |
| 1 | 0 | _B5 | 1 | . | 1 | _E3 | 1 | 1 | _G4 | 1 | 1 | _I6 | 0 (0%)    | 0 (0%)    | 0 (0%)       | 126 (100%)   | 126 |
| 1 | 0 | _B5 | 1 | . | 1 | _E4 | 1 | 1 | _G3 | 1 | 1 | _I5 | 0 (0%)    | 0 (0%)    | 0 (0%)       | 60 (100%)    | 60  |
| 1 | 0 | _B5 | 1 | . | 1 | _E4 | 1 | 1 | _G3 | 1 | 1 | _I6 | 0 (0%)    | 0 (0%)    | 51 (100%)    | 0 (0%)       | 51  |
| 1 | 0 | _B5 | 1 | . | 1 | _E4 | 1 | 1 | _G4 | 1 | 1 | _I5 | 0 (0%)    | 0 (0%)    | 0 (0%)       | 51 (100%)    | 51  |
| 1 | 0 | _B5 | 1 | . | 1 | _E4 | 1 | 1 | _G4 | 1 | 1 | _I6 | 0 (0%)    | 0 (0%)    | 50 (81.967%) | 11 (18.033%) | 61  |
| 1 | 0 | _B5 | 1 | . | 1 | _E5 | 1 | 1 | _G3 | 1 | 1 | _I5 | 0 (0%)    | 0 (0%)    | 0 (0%)       | 46 (100%)    | 46  |
| 1 | 0 | _B5 | 1 | . | 1 | _E5 | 1 | 1 | _G3 | 1 | 1 | _I6 | 0 (0%)    | 0 (0%)    | 61 (96.825%) | 2 (3.175%)   | 63  |
| 1 | 0 | _B5 | 1 | . | 1 | _E5 | 1 | 1 | _G4 | 1 | 1 | _I5 | 0 (0%)    | 0 (0%)    | 0 (0%)       | 64 (100%)    | 64  |
| 1 | 0 | _B5 | 1 | . | 1 | _E5 | 1 | 1 | _G4 | 1 | 1 | _I6 | 0 (0%)    | 0 (0%)    | 35 (70%)     | 15 (30%)     | 50  |
| 1 | 0 | _B5 | 1 | 0 | 0 | _E3 | 0 | 0 | _G3 | 0 | 0 | _I5 | 74 (100%) | 0 (0%)    | 0 (0%)       | 0 (0%)       | 74  |
| 1 | 0 | _B5 | 1 | 0 | 0 | _E3 | 0 | 0 | _G3 | 0 | 0 | _I6 | 84 (100%) | 0 (0%)    | 0 (0%)       | 0 (0%)       | 84  |
| 1 | 0 | _B5 | 1 | 0 | 0 | _E3 | 0 | 0 | _G3 | 1 | 0 | _I5 | 0 (0%)    | 37 (100%) | 0 (0%)       | 0 (0%)       | 37  |
| 1 | 0 | _B5 | 1 | 0 | 0 | _E3 | 0 | 0 | _G3 | 1 | 1 | _I6 | 0 (0%)    | 0 (0%)    | 42 (100%)    | 0 (0%)       | 42  |
| 1 | 0 | _B5 | 1 | 0 | 0 | _E3 | 0 | 0 | _G4 | 0 | 0 | _I5 | 84 (100%) | 0 (0%)    | 0 (0%)       | 0 (0%)       | 84  |
| 1 | 0 | _B5 | 1 | 0 | 0 | _E3 | 0 | 0 | _G4 | 0 | 0 | _I6 | 84 (100%) | 0 (0%)    | 0 (0%)       | 0 (0%)       | 84  |
| 1 | 0 | _B5 | 1 | 0 | 0 | _E3 | 0 | 0 | _G4 | 1 | 0 | _I5 | 0 (0%)    | 42 (100%) | 0 (0%)       | 0 (0%)       | 42  |

|   |   |     |   |   |   |     |   |   |     |   |   |     |               |              |            |          |     |
|---|---|-----|---|---|---|-----|---|---|-----|---|---|-----|---------------|--------------|------------|----------|-----|
| 1 | 0 | _B5 | 1 | 0 | 0 | _E3 | 0 | 0 | _G4 | 1 | 1 | _I6 | 0 (0%)        | 0 (0%)       | 42 (100%)  | 0 (0%)   | 42  |
| 1 | 0 | _B5 | 1 | 0 | 0 | _E3 | 1 | 0 | _G3 | 1 | 0 | _I5 | 0 (0%)        | 37 (100%)    | 0 (0%)     | 0 (0%)   | 37  |
| 1 | 0 | _B5 | 1 | 0 | 0 | _E3 | 1 | 0 | _G3 | 1 | 1 | _I6 | 0 (0%)        | 0 (0%)       | 42 (100%)  | 0 (0%)   | 42  |
| 1 | 0 | _B5 | 1 | 0 | 0 | _E3 | 1 | 0 | _G4 | 1 | 0 | _I5 | 0 (0%)        | 126 (100%)   | 0 (0%)     | 0 (0%)   | 126 |
| 1 | 0 | _B5 | 1 | 0 | 0 | _E3 | 1 | 0 | _G4 | 1 | 1 | _I6 | 0 (0%)        | 0 (0%)       | 126 (100%) | 0 (0%)   | 126 |
| 1 | 0 | _B5 | 1 | 0 | 0 | _E3 | 1 | 1 | _G3 | 1 | 0 | _I5 | 0 (0%)        | 37 (50%)     | 0 (0%)     | 37 (50%) | 74  |
| 1 | 0 | _B5 | 1 | 0 | 0 | _E3 | 1 | 1 | _G3 | 1 | 1 | _I6 | 0 (0%)        | 0 (0%)       | 84 (100%)  | 0 (0%)   | 84  |
| 1 | 0 | _B5 | 1 | 0 | 0 | _E4 | 0 | 0 | _G3 | 0 | 0 | _I5 | 22 (24.444 %) | 68 (75.556%) | 0 (0%)     | 0 (0%)   | 90  |
| 1 | 0 | _B5 | 1 | 0 | 0 | _E4 | 0 | 0 | _G3 | 0 | 0 | _I6 | 76 (100%)     | 0 (0%)       | 0 (0%)     | 0 (0%)   | 76  |
| 1 | 0 | _B5 | 1 | 0 | 0 | _E4 | 0 | 0 | _G3 | 1 | 0 | _I5 | 0 (0%)        | 90 (100%)    | 0 (0%)     | 0 (0%)   | 90  |
| 1 | 0 | _B5 | 1 | 0 | 0 | _E4 | 0 | 0 | _G3 | 1 | 1 | _I6 | 0 (0%)        | 0 (0%)       | 76 (100%)  | 0 (0%)   | 76  |
| 1 | 0 | _B5 | 1 | 0 | 0 | _E4 | 0 | 0 | _G4 | 0 | 0 | _I5 | 0 (0%)        | 72 (100%)    | 0 (0%)     | 0 (0%)   | 72  |
| 1 | 0 | _B5 | 1 | 0 | 0 | _E4 | 0 | 0 | _G4 | 0 | 0 | _I6 | 94 (100%)     | 0 (0%)       | 0 (0%)     | 0 (0%)   | 94  |
| 1 | 0 | _B5 | 1 | 0 | 0 | _E4 | 0 | 0 | _G4 | 1 | 0 | _I5 | 0 (0%)        | 144 (100%)   | 0 (0%)     | 0 (0%)   | 144 |
| 1 | 0 | _B5 | 1 | 0 | 0 | _E4 | 0 | 0 | _G4 | 1 | 1 | _I6 | 0 (0%)        | 0 (0%)       | 188 (100%) | 0 (0%)   | 188 |
| 1 | 0 | _B5 | 1 | 0 | 0 | _E4 | 0 | 1 | _G3 | 1 | 0 | _I5 | 0 (0%)        | 180 (100%)   | 0 (0%)     | 0 (0%)   | 180 |
| 1 | 0 | _B5 | 1 | 0 | 0 | _E4 | 0 | 1 | _G3 | 1 | 1 | _I6 | 0 (0%)        | 0 (0%)       | 152 (100%) | 0 (0%)   | 152 |
| 1 | 0 | _B5 | 1 | 0 | 0 | _E4 | 0 | 1 | _G4 | 1 | 0 | _I5 | 0 (0%)        | 72 (100%)    | 0 (0%)     | 0 (0%)   | 72  |
| 1 | 0 | _B5 | 1 | 0 | 0 | _E4 | 0 | 1 | _G4 | 1 | 1 | _I6 | 0 (0%)        | 0 (0%)       | 94 (100%)  | 0 (0%)   | 94  |
| 1 | 0 | _B5 | 1 | 0 | 0 | _E4 | 1 | 0 | _G3 | 1 | 0 | _I5 | 0 (0%)        | 45 (100%)    | 0 (0%)     | 0 (0%)   | 45  |
| 1 | 0 | _B5 | 1 | 0 | 0 | _E4 | 1 | 0 | _G3 | 1 | 1 | _I6 | 0 (0%)        | 0 (0%)       | 38 (100%)  | 0 (0%)   | 38  |

|   |   |     |   |   |   |     |   |   |     |   |   |     |                 |                  |                  |               |     |
|---|---|-----|---|---|---|-----|---|---|-----|---|---|-----|-----------------|------------------|------------------|---------------|-----|
| 1 | 0 | _B5 | 1 | 0 | 0 | _E4 | 1 | 0 | _G4 | 1 | 0 | _I5 | 0 (0%)          | 108<br>(100%)    | 0 (0%)           | 0 (0%)        | 108 |
| 1 | 0 | _B5 | 1 | 0 | 0 | _E4 | 1 | 0 | _G4 | 1 | 1 | _I6 | 0 (0%)          | 0 (0%)           | 141<br>(100%)    | 0 (0%)        | 141 |
| 1 | 0 | _B5 | 1 | 0 | 0 | _E4 | 1 | 1 | _G3 | 1 | 0 | _I5 | 0 (0%)          | 134<br>(99.259%) | 0 (0%)           | 1<br>(0.741%) | 135 |
| 1 | 0 | _B5 | 1 | 0 | 0 | _E4 | 1 | 1 | _G3 | 1 | 1 | _I6 | 0 (0%)          | 0 (0%)           | 114<br>(100%)    | 0 (0%)        | 114 |
| 1 | 0 | _B5 | 1 | 0 | 0 | _E4 | 1 | 1 | _G4 | 1 | 0 | _I5 | 0 (0%)          | 36 (100%)        | 0 (0%)           | 0 (0%)        | 36  |
| 1 | 0 | _B5 | 1 | 0 | 0 | _E4 | 1 | 1 | _G4 | 1 | 1 | _I6 | 0 (0%)          | 0 (0%)           | 47 (100%)        | 0 (0%)        | 47  |
| 1 | 0 | _B5 | 1 | 0 | 0 | _E5 | 0 | 0 | _G3 | 0 | 0 | _I5 | 16<br>(23.529%) | 52<br>(76.471%)  | 0 (0%)           | 0 (0%)        | 68  |
| 1 | 0 | _B5 | 1 | 0 | 0 | _E5 | 0 | 0 | _G3 | 0 | 0 | _I6 | 98<br>(100%)    | 0 (0%)           | 0 (0%)           | 0 (0%)        | 98  |
| 1 | 0 | _B5 | 1 | 0 | 0 | _E5 | 0 | 0 | _G3 | 1 | 0 | _I5 | 0 (0%)          | 68 (100%)        | 0 (0%)           | 0 (0%)        | 68  |
| 1 | 0 | _B5 | 1 | 0 | 0 | _E5 | 0 | 0 | _G3 | 1 | 1 | _I6 | 0 (0%)          | 0 (0%)           | 96<br>(97.959%)  | 2<br>(2.041%) | 98  |
| 1 | 0 | _B5 | 1 | 0 | 0 | _E5 | 0 | 0 | _G4 | 0 | 0 | _I5 | 0 (0%)          | 98 (100%)        | 0 (0%)           | 0 (0%)        | 98  |
| 1 | 0 | _B5 | 1 | 0 | 0 | _E5 | 0 | 0 | _G4 | 0 | 0 | _I6 | 78<br>(100%)    | 0 (0%)           | 0 (0%)           | 0 (0%)        | 78  |
| 1 | 0 | _B5 | 1 | 0 | 0 | _E5 | 0 | 0 | _G4 | 1 | 0 | _I5 | 0 (0%)          | 196<br>(100%)    | 0 (0%)           | 0 (0%)        | 196 |
| 1 | 0 | _B5 | 1 | 0 | 0 | _E5 | 0 | 0 | _G4 | 1 | 1 | _I6 | 0 (0%)          | 0 (0%)           | 156<br>(100%)    | 0 (0%)        | 156 |
| 1 | 0 | _B5 | 1 | 0 | 0 | _E5 | 0 | 1 | _G3 | 1 | 0 | _I5 | 0 (0%)          | 136<br>(100%)    | 0 (0%)           | 0 (0%)        | 136 |
| 1 | 0 | _B5 | 1 | 0 | 0 | _E5 | 0 | 1 | _G3 | 1 | 1 | _I6 | 0 (0%)          | 0 (0%)           | 192<br>(97.959%) | 4<br>(2.041%) | 196 |
| 1 | 0 | _B5 | 1 | 0 | 0 | _E5 | 0 | 1 | _G4 | 1 | 0 | _I5 | 0 (0%)          | 98 (100%)        | 0 (0%)           | 0 (0%)        | 98  |
| 1 | 0 | _B5 | 1 | 0 | 0 | _E5 | 0 | 1 | _G4 | 1 | 1 | _I6 | 0 (0%)          | 0 (0%)           | 78 (100%)        | 0 (0%)        | 78  |
| 1 | 0 | _B5 | 1 | 0 | 0 | _E5 | 1 | 0 | _G3 | 1 | 0 | _I5 | 0 (0%)          | 34 (100%)        | 0 (0%)           | 0 (0%)        | 34  |
| 1 | 0 | _B5 | 1 | 0 | 0 | _E5 | 1 | 0 | _G3 | 1 | 1 | _I6 | 0 (0%)          | 0 (0%)           | 48<br>(97.959%)  | 1<br>(2.041%) | 49  |
| 1 | 0 | _B5 | 1 | 0 | 0 | _E5 | 1 | 0 | _G4 | 1 | 0 | _I5 | 0 (0%)          | 147<br>(100%)    | 0 (0%)           | 0 (0%)        | 147 |

Supplemental material is neither peer-reviewed nor thoroughly edited by CJASN. The authors alone are responsible for the accuracy and presentation of the material.

|   |   |     |   |   |   |     |   |   |     |   |   |     |        |               |                  |                 |     |
|---|---|-----|---|---|---|-----|---|---|-----|---|---|-----|--------|---------------|------------------|-----------------|-----|
| 1 | 0 | _B5 | 1 | 0 | 0 | _E5 | 1 | 0 | _G4 | 1 | 1 | _I6 | 0 (0%) | 0 (0%)        | 117<br>(100%)    | 0 (0%)          | 117 |
| 1 | 0 | _B5 | 1 | 0 | 0 | _E5 | 1 | 1 | _G3 | 1 | 0 | _I5 | 0 (0%) | 102<br>(100%) | 0 (0%)           | 0 (0%)          | 102 |
| 1 | 0 | _B5 | 1 | 0 | 0 | _E5 | 1 | 1 | _G3 | 1 | 1 | _I6 | 0 (0%) | 0 (0%)        | 144<br>(97.959%) | 3<br>(2.041%)   | 147 |
| 1 | 0 | _B5 | 1 | 0 | 0 | _E5 | 1 | 1 | _G4 | 1 | 0 | _I5 | 0 (0%) | 49 (100%)     | 0 (0%)           | 0 (0%)          | 49  |
| 1 | 0 | _B5 | 1 | 0 | 0 | _E5 | 1 | 1 | _G4 | 1 | 1 | _I6 | 0 (0%) | 0 (0%)        | 39 (100%)        | 0 (0%)          | 39  |
| 1 | 0 | _B5 | 1 | 0 | 1 | _E3 | 0 | 0 | _G3 | 1 | 0 | _I5 | 0 (0%) | 37 (100%)     | 0 (0%)           | 0 (0%)          | 37  |
| 1 | 0 | _B5 | 1 | 0 | 1 | _E3 | 0 | 0 | _G3 | 1 | 1 | _I6 | 0 (0%) | 0 (0%)        | 42 (100%)        | 0 (0%)          | 42  |
| 1 | 0 | _B5 | 1 | 0 | 1 | _E3 | 0 | 0 | _G4 | 1 | 0 | _I5 | 0 (0%) | 126<br>(100%) | 0 (0%)           | 0 (0%)          | 126 |
| 1 | 0 | _B5 | 1 | 0 | 1 | _E3 | 0 | 0 | _G4 | 1 | 1 | _I6 | 0 (0%) | 0 (0%)        | 126<br>(100%)    | 0 (0%)          | 126 |
| 1 | 0 | _B5 | 1 | 0 | 1 | _E3 | 0 | 1 | _G3 | 1 | 0 | _I5 | 0 (0%) | 148<br>(100%) | 0 (0%)           | 0 (0%)          | 148 |
| 1 | 0 | _B5 | 1 | 0 | 1 | _E3 | 0 | 1 | _G3 | 1 | 1 | _I6 | 0 (0%) | 0 (0%)        | 168<br>(100%)    | 0 (0%)          | 168 |
| 1 | 0 | _B5 | 1 | 0 | 1 | _E3 | 0 | 1 | _G4 | 1 | 0 | _I5 | 0 (0%) | 84 (100%)     | 0 (0%)           | 0 (0%)          | 84  |
| 1 | 0 | _B5 | 1 | 0 | 1 | _E3 | 0 | 1 | _G4 | 1 | 1 | _I6 | 0 (0%) | 0 (0%)        | 84 (100%)        | 0 (0%)          | 84  |
| 1 | 0 | _B5 | 1 | 0 | 1 | _E3 | 1 | 1 | _G3 | 1 | 0 | _I5 | 0 (0%) | 0 (0%)        | 0 (0%)           | 74 (100%)       | 74  |
| 1 | 0 | _B5 | 1 | 0 | 1 | _E3 | 1 | 1 | _G3 | 1 | 1 | _I6 | 0 (0%) | 0 (0%)        | 84 (100%)        | 0 (0%)          | 84  |
| 1 | 0 | _B5 | 1 | 0 | 1 | _E3 | 1 | 1 | _G4 | 1 | 0 | _I5 | 0 (0%) | 0 (0%)        | 0 (0%)           | 84 (100%)       | 84  |
| 1 | 0 | _B5 | 1 | 0 | 1 | _E3 | 1 | 1 | _G4 | 1 | 1 | _I6 | 0 (0%) | 0 (0%)        | 0 (0%)           | 84 (100%)       | 84  |
| 1 | 0 | _B5 | 1 | 0 | 1 | _E4 | 1 | 1 | _G3 | 1 | 0 | _I5 | 0 (0%) | 0 (0%)        | 0 (0%)           | 45 (100%)       | 45  |
| 1 | 0 | _B5 | 1 | 0 | 1 | _E4 | 1 | 1 | _G3 | 1 | 1 | _I6 | 0 (0%) | 0 (0%)        | 38 (100%)        | 0 (0%)          | 38  |
| 1 | 0 | _B5 | 1 | 0 | 1 | _E4 | 1 | 1 | _G4 | 1 | 0 | _I5 | 0 (0%) | 0 (0%)        | 0 (0%)           | 36 (100%)       | 36  |
| 1 | 0 | _B5 | 1 | 0 | 1 | _E4 | 1 | 1 | _G4 | 1 | 1 | _I6 | 0 (0%) | 0 (0%)        | 24<br>(51.064%)  | 23<br>(48.936%) | 47  |

Supplemental material is neither peer-reviewed nor thoroughly edited by CJASN. The authors alone are responsible for the accuracy and presentation of the material.

|   |   |     |   |   |   |     |   |   |     |   |   |     |              |                 |                 |                 |     |
|---|---|-----|---|---|---|-----|---|---|-----|---|---|-----|--------------|-----------------|-----------------|-----------------|-----|
| 1 | 0 | _B5 | 1 | 0 | 1 | _E5 | 1 | 1 | _G3 | 1 | 0 | _I5 | 0 (0%)       | 0 (0%)          | 0 (0%)          | 34 (100%)       | 34  |
| 1 | 0 | _B5 | 1 | 0 | 1 | _E5 | 1 | 1 | _G3 | 1 | 1 | _I6 | 0 (0%)       | 0 (0%)          | 48<br>(97.959%) | 1<br>(2.041%)   | 49  |
| 1 | 0 | _B5 | 1 | 0 | 1 | _E5 | 1 | 1 | _G4 | 1 | 0 | _I5 | 0 (0%)       | 0 (0%)          | 0 (0%)          | 49 (100%)       | 49  |
| 1 | 0 | _B5 | 1 | 0 | 1 | _E5 | 1 | 1 | _G4 | 1 | 1 | _I6 | 0 (0%)       | 0 (0%)          | 16<br>(41.026%) | 23<br>(58.974%) | 39  |
| 1 | 0 | _B5 | 1 | 1 | 0 | _E4 | 0 | 1 | _G3 | 1 | 1 | _I5 | 0 (0%)       | 21<br>(46.667%) | 0 (0%)          | 24<br>(53.333%) | 45  |
| 1 | 0 | _B5 | 1 | 1 | 0 | _E4 | 0 | 1 | _G3 | 1 | 1 | _I6 | 0 (0%)       | 0 (0%)          | 38 (100%)       | 0 (0%)          | 38  |
| 1 | 0 | _B5 | 1 | 1 | 0 | _E4 | 0 | 1 | _G4 | 1 | 1 | _I5 | 0 (0%)       | 9 (25%)         | 0 (0%)          | 27 (75%)        | 36  |
| 1 | 0 | _B5 | 1 | 1 | 0 | _E4 | 0 | 1 | _G4 | 1 | 1 | _I6 | 0 (0%)       | 0 (0%)          | 47 (100%)       | 0 (0%)          | 47  |
| 1 | 0 | _B5 | 1 | 1 | 0 | _E5 | 0 | 1 | _G3 | 1 | 1 | _I5 | 0 (0%)       | 18<br>(52.941%) | 0 (0%)          | 16<br>(47.059%) | 34  |
| 1 | 0 | _B5 | 1 | 1 | 0 | _E5 | 0 | 1 | _G3 | 1 | 1 | _I6 | 0 (0%)       | 0 (0%)          | 48<br>(97.959%) | 1<br>(2.041%)   | 49  |
| 1 | 0 | _B5 | 1 | 1 | 0 | _E5 | 0 | 1 | _G4 | 1 | 1 | _I5 | 0 (0%)       | 22<br>(44.898%) | 2<br>(4.082%)   | 25<br>(51.02%)  | 49  |
| 1 | 0 | _B5 | 1 | 1 | 0 | _E5 | 0 | 1 | _G4 | 1 | 1 | _I6 | 0 (0%)       | 0 (0%)          | 39 (100%)       | 0 (0%)          | 39  |
| 1 | 0 | _B5 | 1 | 1 | 1 | _E3 | 0 | 1 | _G3 | 1 | 1 | _I5 | 0 (0%)       | 0 (0%)          | 0 (0%)          | 37 (100%)       | 37  |
| 1 | 0 | _B5 | 1 | 1 | 1 | _E3 | 0 | 1 | _G3 | 1 | 1 | _I6 | 0 (0%)       | 0 (0%)          | 42 (100%)       | 0 (0%)          | 42  |
| 1 | 0 | _B5 | 1 | 1 | 1 | _E3 | 0 | 1 | _G4 | 1 | 1 | _I5 | 0 (0%)       | 0 (0%)          | 0 (0%)          | 42 (100%)       | 42  |
| 1 | 0 | _B5 | 1 | 1 | 1 | _E3 | 0 | 1 | _G4 | 1 | 1 | _I6 | 0 (0%)       | 0 (0%)          | 42 (100%)       | 0 (0%)          | 42  |
| 1 | 1 | _B3 | 0 | . | 0 | _E3 | 0 | 0 | _G3 | 0 | 0 | _I5 | 0 (0%)       | 41 (100%)       | 0 (0%)          | 0 (0%)          | 41  |
| 1 | 1 | _B3 | 0 | . | 0 | _E3 | 0 | 0 | _G3 | 0 | 0 | _I6 | 39<br>(100%) | 0 (0%)          | 0 (0%)          | 0 (0%)          | 39  |
| 1 | 1 | _B3 | 0 | . | 0 | _E3 | 0 | 0 | _G4 | . | 0 | _I5 | 0 (0%)       | 44 (100%)       | 0 (0%)          | 0 (0%)          | 44  |
| 1 | 1 | _B3 | 0 | . | 0 | _E3 | 0 | 0 | _G4 | . | 0 | _I6 | 42<br>(100%) | 0 (0%)          | 0 (0%)          | 0 (0%)          | 42  |
| 1 | 1 | _B3 | 0 | . | 0 | _E3 | 0 | 0 | _G4 | 0 | 0 | _I5 | 0 (0%)       | 220<br>(100%)   | 0 (0%)          | 0 (0%)          | 220 |

|   |   |     |   |   |   |     |   |   |     |   |   |     |               |               |           |        |     |
|---|---|-----|---|---|---|-----|---|---|-----|---|---|-----|---------------|---------------|-----------|--------|-----|
| 1 | 1 | _B3 | 0 | . | 0 | _E3 | 0 | 0 | _G4 | 0 | 0 | _I6 | 210<br>(100%) | 0 (0%)        | 0 (0%)    | 0 (0%) | 210 |
| 1 | 1 | _B3 | 0 | . | 0 | _E3 | 0 | 0 | _G4 | 1 | 0 | _I5 | 0 (0%)        | 44 (100%)     | 0 (0%)    | 0 (0%) | 44  |
| 1 | 1 | _B3 | 0 | . | 0 | _E3 | 0 | 0 | _G4 | 1 | 1 | _I6 | 0 (0%)        | 0 (0%)        | 42 (100%) | 0 (0%) | 42  |
| 1 | 1 | _B3 | 0 | . | 0 | _E3 | 0 | 1 | _G3 | . | 0 | _I5 | 0 (0%)        | 82 (100%)     | 0 (0%)    | 0 (0%) | 82  |
| 1 | 1 | _B3 | 0 | . | 0 | _E3 | 0 | 1 | _G3 | . | 0 | _I6 | 0 (0%)        | 117<br>(100%) | 0 (0%)    | 0 (0%) | 117 |
| 1 | 1 | _B3 | 0 | . | 0 | _E3 | 0 | 1 | _G3 | . | 1 | _I5 | 0 (0%)        | 0 (0%)        | 41 (100%) | 0 (0%) | 41  |
| 1 | 1 | _B3 | 0 | . | 0 | _E3 | 0 | 1 | _G3 | 0 | 0 | _I5 | 0 (0%)        | 205<br>(100%) | 0 (0%)    | 0 (0%) | 205 |
| 1 | 1 | _B3 | 0 | . | 0 | _E3 | 0 | 1 | _G3 | 0 | 0 | _I6 | 0 (0%)        | 195<br>(100%) | 0 (0%)    | 0 (0%) | 195 |
| 1 | 1 | _B3 | 0 | . | 0 | _E3 | 0 | 1 | _G3 | 1 | 0 | _I5 | 0 (0%)        | 82 (100%)     | 0 (0%)    | 0 (0%) | 82  |
| 1 | 1 | _B3 | 0 | . | 0 | _E3 | 0 | 1 | _G3 | 1 | 0 | _I6 | 0 (0%)        | 39 (100%)     | 0 (0%)    | 0 (0%) | 39  |
| 1 | 1 | _B3 | 0 | . | 0 | _E3 | 0 | 1 | _G3 | 1 | 1 | _I6 | 0 (0%)        | 0 (0%)        | 39 (100%) | 0 (0%) | 39  |
| 1 | 1 | _B3 | 0 | . | 0 | _E3 | 0 | 1 | _G4 | . | 0 | _I5 | 0 (0%)        | 0 (0%)        | 44 (100%) | 0 (0%) | 44  |
| 1 | 1 | _B3 | 0 | . | 0 | _E3 | 0 | 1 | _G4 | . | 0 | _I6 | 0 (0%)        | 84 (100%)     | 0 (0%)    | 0 (0%) | 84  |
| 1 | 1 | _B3 | 0 | . | 0 | _E3 | 0 | 1 | _G4 | . | 1 | _I5 | 0 (0%)        | 0 (0%)        | 44 (100%) | 0 (0%) | 44  |
| 1 | 1 | _B3 | 0 | . | 0 | _E3 | 0 | 1 | _G4 | 0 | 0 | _I5 | 0 (0%)        | 0 (0%)        | 44 (100%) | 0 (0%) | 44  |
| 1 | 1 | _B3 | 0 | . | 0 | _E3 | 0 | 1 | _G4 | 0 | 0 | _I6 | 0 (0%)        | 42 (100%)     | 0 (0%)    | 0 (0%) | 42  |
| 1 | 1 | _B3 | 0 | . | 0 | _E3 | 0 | 1 | _G4 | 1 | 0 | _I5 | 0 (0%)        | 0 (0%)        | 44 (100%) | 0 (0%) | 44  |
| 1 | 1 | _B3 | 0 | . | 0 | _E3 | 0 | 1 | _G4 | 1 | 0 | _I6 | 0 (0%)        | 42 (100%)     | 0 (0%)    | 0 (0%) | 42  |
| 1 | 1 | _B3 | 0 | . | 0 | _E4 | 0 | . | _G3 | . | 0 | _I5 | 0 (0%)        | 45 (100%)     | 0 (0%)    | 0 (0%) | 45  |
| 1 | 1 | _B3 | 0 | . | 0 | _E4 | 0 | . | _G3 | . | 0 | _I6 | 0 (0%)        | 34 (100%)     | 0 (0%)    | 0 (0%) | 34  |
| 1 | 1 | _B3 | 0 | . | 0 | _E4 | 0 | . | _G4 | . | 0 | _I5 | 0 (0%)        | 40 (100%)     | 0 (0%)    | 0 (0%) | 40  |

|   |   |     |   |   |   |     |   |   |     |   |   |     |                  |                 |           |        |     |
|---|---|-----|---|---|---|-----|---|---|-----|---|---|-----|------------------|-----------------|-----------|--------|-----|
| 1 | 1 | _B3 | 0 | . | 0 | _E4 | 0 | . | _G4 | . | 0 | _I6 | 3<br>(6.522%)    | 43<br>(93.478%) | 0 (0%)    | 0 (0%) | 46  |
| 1 | 1 | _B3 | 0 | . | 0 | _E4 | 0 | 0 | _G3 | 0 | 0 | _I5 | 44<br>(97.778%)  | 1<br>(2.222%)   | 0 (0%)    | 0 (0%) | 45  |
| 1 | 1 | _B3 | 0 | . | 0 | _E4 | 0 | 0 | _G3 | 0 | 0 | _I6 | 34<br>(100%)     | 0 (0%)          | 0 (0%)    | 0 (0%) | 34  |
| 1 | 1 | _B3 | 0 | . | 0 | _E4 | 0 | 0 | _G4 | . | 0 | _I5 | 0 (0%)           | 40 (100%)       | 0 (0%)    | 0 (0%) | 40  |
| 1 | 1 | _B3 | 0 | . | 0 | _E4 | 0 | 0 | _G4 | . | 0 | _I6 | 17<br>(36.957%)  | 29<br>(63.043%) | 0 (0%)    | 0 (0%) | 46  |
| 1 | 1 | _B3 | 0 | . | 0 | _E4 | 0 | 0 | _G4 | 0 | 0 | _I5 | 71<br>(17.75%)   | 329<br>(82.25%) | 0 (0%)    | 0 (0%) | 400 |
| 1 | 1 | _B3 | 0 | . | 0 | _E4 | 0 | 0 | _G4 | 0 | 0 | _I6 | 427<br>(92.826%) | 33<br>(7.174%)  | 0 (0%)    | 0 (0%) | 460 |
| 1 | 1 | _B3 | 0 | . | 0 | _E4 | 0 | 0 | _G4 | 1 | 0 | _I5 | 0 (0%)           | 40 (100%)       | 0 (0%)    | 0 (0%) | 40  |
| 1 | 1 | _B3 | 0 | . | 0 | _E4 | 0 | 0 | _G4 | 1 | 1 | _I6 | 0 (0%)           | 0 (0%)          | 46 (100%) | 0 (0%) | 46  |
| 1 | 1 | _B3 | 0 | . | 0 | _E4 | 0 | 1 | _G3 | . | 0 | _I5 | 0 (0%)           | 135<br>(100%)   | 0 (0%)    | 0 (0%) | 135 |
| 1 | 1 | _B3 | 0 | . | 0 | _E4 | 0 | 1 | _G3 | . | 0 | _I6 | 0 (0%)           | 136<br>(100%)   | 0 (0%)    | 0 (0%) | 136 |
| 1 | 1 | _B3 | 0 | . | 0 | _E4 | 0 | 1 | _G3 | . | 1 | _I5 | 0 (0%)           | 0 (0%)          | 45 (100%) | 0 (0%) | 45  |
| 1 | 1 | _B3 | 0 | . | 0 | _E4 | 0 | 1 | _G3 | 0 | 0 | _I5 | 0 (0%)           | 705<br>(100%)   | 0 (0%)    | 0 (0%) | 705 |
| 1 | 1 | _B3 | 0 | . | 0 | _E4 | 0 | 1 | _G3 | 0 | 0 | _I6 | 0 (0%)           | 544<br>(100%)   | 0 (0%)    | 0 (0%) | 544 |
| 1 | 1 | _B3 | 0 | . | 0 | _E4 | 0 | 1 | _G3 | 0 | 1 | _I5 | 0 (0%)           | 0 (0%)          | 15 (100%) | 0 (0%) | 15  |
| 1 | 1 | _B3 | 0 | . | 0 | _E4 | 0 | 1 | _G3 | 1 | 0 | _I5 | 0 (0%)           | 90 (100%)       | 0 (0%)    | 0 (0%) | 90  |
| 1 | 1 | _B3 | 0 | . | 0 | _E4 | 0 | 1 | _G3 | 1 | 0 | _I6 | 0 (0%)           | 34 (100%)       | 0 (0%)    | 0 (0%) | 34  |
| 1 | 1 | _B3 | 0 | . | 0 | _E4 | 0 | 1 | _G3 | 1 | 1 | _I6 | 0 (0%)           | 0 (0%)          | 34 (100%) | 0 (0%) | 34  |
| 1 | 1 | _B3 | 0 | . | 0 | _E4 | 0 | 1 | _G4 | . | 0 | _I5 | 0 (0%)           | 80 (100%)       | 0 (0%)    | 0 (0%) | 80  |
| 1 | 1 | _B3 | 0 | . | 0 | _E4 | 0 | 1 | _G4 | . | 0 | _I6 | 0 (0%)           | 138<br>(100%)   | 0 (0%)    | 0 (0%) | 138 |

|   |   |     |   |   |   |     |   |   |     |   |   |     |                |               |           |        |     |
|---|---|-----|---|---|---|-----|---|---|-----|---|---|-----|----------------|---------------|-----------|--------|-----|
| 1 | 1 | _B3 | 0 | . | 0 | _E4 | 0 | 1 | _G4 | . | 1 | _I5 | 0 (0%)         | 0 (0%)        | 40 (100%) | 0 (0%) | 40  |
| 1 | 1 | _B3 | 0 | . | 0 | _E4 | 0 | 1 | _G4 | 0 | 0 | _I5 | 0 (0%)         | 268 (100%)    | 0 (0%)    | 0 (0%) | 268 |
| 1 | 1 | _B3 | 0 | . | 0 | _E4 | 0 | 1 | _G4 | 0 | 0 | _I6 | 0 (0%)         | 322 (100%)    | 0 (0%)    | 0 (0%) | 322 |
| 1 | 1 | _B3 | 0 | . | 0 | _E4 | 0 | 1 | _G4 | 0 | 1 | _I5 | 0 (0%)         | 0 (0%)        | 16 (100%) | 0 (0%) | 16  |
| 1 | 1 | _B3 | 0 | . | 0 | _E4 | 0 | 1 | _G4 | 1 | 0 | _I5 | 0 (0%)         | 40 (100%)     | 0 (0%)    | 0 (0%) | 40  |
| 1 | 1 | _B3 | 0 | . | 0 | _E4 | 0 | 1 | _G4 | 1 | 0 | _I6 | 0 (0%)         | 46 (100%)     | 0 (0%)    | 0 (0%) | 46  |
| 1 | 1 | _B3 | 0 | . | 0 | _E5 | 0 | . | _G3 | . | 0 | _I5 | 0 (0%)         | 41 (100%)     | 0 (0%)    | 0 (0%) | 41  |
| 1 | 1 | _B3 | 0 | . | 0 | _E5 | 0 | . | _G3 | . | 0 | _I6 | 0 (0%)         | 41 (100%)     | 0 (0%)    | 0 (0%) | 41  |
| 1 | 1 | _B3 | 0 | . | 0 | _E5 | 0 | . | _G4 | . | 0 | _I5 | 0 (0%)         | 47 (100%)     | 0 (0%)    | 0 (0%) | 47  |
| 1 | 1 | _B3 | 0 | . | 0 | _E5 | 0 | . | _G4 | . | 0 | _I6 | 3 (7.5%)       | 37 (92.5%)    | 0 (0%)    | 0 (0%) | 40  |
| 1 | 1 | _B3 | 0 | . | 0 | _E5 | 0 | 0 | _G3 | . | 0 | _I6 | 1 (100%)       | 0 (0%)        | 0 (0%)    | 0 (0%) | 1   |
| 1 | 1 | _B3 | 0 | . | 0 | _E5 | 0 | 0 | _G3 | 0 | 0 | _I5 | 41 (100%)      | 0 (0%)        | 0 (0%)    | 0 (0%) | 41  |
| 1 | 1 | _B3 | 0 | . | 0 | _E5 | 0 | 0 | _G3 | 0 | 0 | _I6 | 51 (100%)      | 0 (0%)        | 0 (0%)    | 0 (0%) | 51  |
| 1 | 1 | _B3 | 0 | . | 0 | _E5 | 0 | 0 | _G3 | 1 | 1 | _I6 | 0 (0%)         | 0 (0%)        | 1 (100%)  | 0 (0%) | 1   |
| 1 | 1 | _B3 | 0 | . | 0 | _E5 | 0 | 0 | _G4 | . | 0 | _I5 | 0 (0%)         | 47 (100%)     | 0 (0%)    | 0 (0%) | 47  |
| 1 | 1 | _B3 | 0 | . | 0 | _E5 | 0 | 0 | _G4 | . | 0 | _I6 | 29 (72.5%)     | 11 (27.5%)    | 0 (0%)    | 0 (0%) | 40  |
| 1 | 1 | _B3 | 0 | . | 0 | _E5 | 0 | 0 | _G4 | 0 | 0 | _I5 | 88 (17.021 %)  | 429 (82.979%) | 0 (0%)    | 0 (0%) | 517 |
| 1 | 1 | _B3 | 0 | . | 0 | _E5 | 0 | 0 | _G4 | 0 | 0 | _I6 | 423 (96.136 %) | 17 (3.864%)   | 0 (0%)    | 0 (0%) | 440 |
| 1 | 1 | _B3 | 0 | . | 0 | _E5 | 0 | 0 | _G4 | 1 | 0 | _I5 | 0 (0%)         | 47 (100%)     | 0 (0%)    | 0 (0%) | 47  |
| 1 | 1 | _B3 | 0 | . | 0 | _E5 | 0 | 0 | _G4 | 1 | 1 | _I6 | 0 (0%)         | 0 (0%)        | 40 (100%) | 0 (0%) | 40  |
| 1 | 1 | _B3 | 0 | . | 0 | _E5 | 0 | 1 | _G3 | . | 0 | _I5 | 0 (0%)         | 123 (100%)    | 0 (0%)    | 0 (0%) | 123 |

*Supplemental material is neither peer-reviewed nor thoroughly edited by CJASN. The authors alone are responsible for the accuracy and presentation of the material.*

|   |   |     |   |   |   |     |   |   |     |   |   |     |        |               |           |        |     |
|---|---|-----|---|---|---|-----|---|---|-----|---|---|-----|--------|---------------|-----------|--------|-----|
| 1 | 1 | _B3 | 0 | . | 0 | _E5 | 0 | 1 | _G3 | . | 0 | _I6 | 0 (0%) | 163<br>(100%) | 0 (0%)    | 0 (0%) | 163 |
| 1 | 1 | _B3 | 0 | . | 0 | _E5 | 0 | 1 | _G3 | . | 1 | _I5 | 0 (0%) | 0 (0%)        | 41 (100%) | 0 (0%) | 41  |
| 1 | 1 | _B3 | 0 | . | 0 | _E5 | 0 | 1 | _G3 | 0 | 0 | _I5 | 0 (0%) | 677<br>(100%) | 0 (0%)    | 0 (0%) | 677 |
| 1 | 1 | _B3 | 0 | . | 0 | _E5 | 0 | 1 | _G3 | 0 | 0 | _I6 | 0 (0%) | 683<br>(100%) | 0 (0%)    | 0 (0%) | 683 |
| 1 | 1 | _B3 | 0 | . | 0 | _E5 | 0 | 1 | _G3 | 0 | 1 | _I5 | 0 (0%) | 0 (0%)        | 12 (100%) | 0 (0%) | 12  |
| 1 | 1 | _B3 | 0 | . | 0 | _E5 | 0 | 1 | _G3 | 1 | 0 | _I5 | 0 (0%) | 82 (100%)     | 0 (0%)    | 0 (0%) | 82  |
| 1 | 1 | _B3 | 0 | . | 0 | _E5 | 0 | 1 | _G3 | 1 | 0 | _I6 | 0 (0%) | 41 (100%)     | 0 (0%)    | 0 (0%) | 41  |
| 1 | 1 | _B3 | 0 | . | 0 | _E5 | 0 | 1 | _G3 | 1 | 1 | _I6 | 0 (0%) | 0 (0%)        | 40 (100%) | 0 (0%) | 40  |
| 1 | 1 | _B3 | 0 | . | 0 | _E5 | 0 | 1 | _G4 | . | 0 | _I5 | 0 (0%) | 94 (100%)     | 0 (0%)    | 0 (0%) | 94  |
| 1 | 1 | _B3 | 0 | . | 0 | _E5 | 0 | 1 | _G4 | . | 0 | _I6 | 0 (0%) | 120<br>(100%) | 0 (0%)    | 0 (0%) | 120 |
| 1 | 1 | _B3 | 0 | . | 0 | _E5 | 0 | 1 | _G4 | . | 1 | _I5 | 0 (0%) | 0 (0%)        | 47 (100%) | 0 (0%) | 47  |
| 1 | 1 | _B3 | 0 | . | 0 | _E5 | 0 | 1 | _G4 | 0 | 0 | _I5 | 0 (0%) | 320<br>(100%) | 0 (0%)    | 0 (0%) | 320 |
| 1 | 1 | _B3 | 0 | . | 0 | _E5 | 0 | 1 | _G4 | 0 | 0 | _I6 | 0 (0%) | 275<br>(100%) | 0 (0%)    | 0 (0%) | 275 |
| 1 | 1 | _B3 | 0 | . | 0 | _E5 | 0 | 1 | _G4 | 0 | 1 | _I5 | 0 (0%) | 0 (0%)        | 18 (100%) | 0 (0%) | 18  |
| 1 | 1 | _B3 | 0 | . | 0 | _E5 | 0 | 1 | _G4 | 1 | 0 | _I5 | 0 (0%) | 47 (100%)     | 0 (0%)    | 0 (0%) | 47  |
| 1 | 1 | _B3 | 0 | . | 0 | _E5 | 0 | 1 | _G4 | 1 | 0 | _I6 | 0 (0%) | 40 (100%)     | 0 (0%)    | 0 (0%) | 40  |
| 1 | 1 | _B3 | 0 | . | 1 | _E3 | 0 | . | _G3 | . | 0 | _I5 | 0 (0%) | 0 (0%)        | 41 (100%) | 0 (0%) | 41  |
| 1 | 1 | _B3 | 0 | . | 1 | _E3 | 0 | . | _G3 | . | 0 | _I6 | 0 (0%) | 39 (100%)     | 0 (0%)    | 0 (0%) | 39  |
| 1 | 1 | _B3 | 0 | . | 1 | _E3 | 0 | . | _G4 | . | 0 | _I5 | 0 (0%) | 0 (0%)        | 44 (100%) | 0 (0%) | 44  |
| 1 | 1 | _B3 | 0 | . | 1 | _E3 | 0 | . | _G4 | . | 0 | _I6 | 0 (0%) | 42 (100%)     | 0 (0%)    | 0 (0%) | 42  |
| 1 | 1 | _B3 | 0 | . | 1 | _E3 | 0 | 0 | _G4 | 0 | 0 | _I5 | 0 (0%) | 264<br>(100%) | 0 (0%)    | 0 (0%) | 264 |

|   |   |     |   |   |   |     |   |   |     |   |   |     |        |            |            |           |     |
|---|---|-----|---|---|---|-----|---|---|-----|---|---|-----|--------|------------|------------|-----------|-----|
| 1 | 1 | _B3 | 0 | . | 1 | _E3 | 0 | 0 | _G4 | 0 | 0 | _I6 | 0 (0%) | 252 (100%) | 0 (0%)     | 0 (0%)    | 252 |
| 1 | 1 | _B3 | 0 | . | 1 | _E3 | 0 | 1 | _G3 | . | 0 | _I5 | 0 (0%) | 0 (0%)     | 41 (100%)  | 0 (0%)    | 41  |
| 1 | 1 | _B3 | 0 | . | 1 | _E3 | 0 | 1 | _G3 | . | 0 | _I6 | 0 (0%) | 78 (100%)  | 0 (0%)     | 0 (0%)    | 78  |
| 1 | 1 | _B3 | 0 | . | 1 | _E3 | 0 | 1 | _G3 | . | 1 | _I5 | 0 (0%) | 0 (0%)     | 41 (100%)  | 0 (0%)    | 41  |
| 1 | 1 | _B3 | 0 | . | 1 | _E3 | 0 | 1 | _G3 | 0 | 0 | _I5 | 0 (0%) | 0 (0%)     | 533 (100%) | 0 (0%)    | 533 |
| 1 | 1 | _B3 | 0 | . | 1 | _E3 | 0 | 1 | _G3 | 0 | 0 | _I6 | 0 (0%) | 663 (100%) | 0 (0%)     | 0 (0%)    | 663 |
| 1 | 1 | _B3 | 0 | . | 1 | _E3 | 0 | 1 | _G3 | 0 | 1 | _I5 | 0 (0%) | 0 (0%)     | 164 (100%) | 0 (0%)    | 164 |
| 1 | 1 | _B3 | 0 | . | 1 | _E3 | 0 | 1 | _G4 | . | 0 | _I5 | 0 (0%) | 0 (0%)     | 44 (100%)  | 0 (0%)    | 44  |
| 1 | 1 | _B3 | 0 | . | 1 | _E3 | 0 | 1 | _G4 | . | 0 | _I6 | 0 (0%) | 84 (100%)  | 0 (0%)     | 0 (0%)    | 84  |
| 1 | 1 | _B3 | 0 | . | 1 | _E3 | 0 | 1 | _G4 | . | 1 | _I5 | 0 (0%) | 0 (0%)     | 44 (100%)  | 0 (0%)    | 44  |
| 1 | 1 | _B3 | 0 | . | 1 | _E3 | 0 | 1 | _G4 | 0 | 0 | _I5 | 0 (0%) | 0 (0%)     | 308 (100%) | 0 (0%)    | 308 |
| 1 | 1 | _B3 | 0 | . | 1 | _E3 | 0 | 1 | _G4 | 0 | 0 | _I6 | 0 (0%) | 462 (100%) | 0 (0%)     | 0 (0%)    | 462 |
| 1 | 1 | _B3 | 0 | . | 1 | _E3 | 0 | 1 | _G4 | 0 | 1 | _I5 | 0 (0%) | 0 (0%)     | 176 (100%) | 0 (0%)    | 176 |
| 1 | 1 | _B3 | 0 | . | 1 | _E3 | 1 | 1 | _G3 | 1 | 1 | _I5 | 0 (0%) | 0 (0%)     | 0 (0%)     | 41 (100%) | 41  |
| 1 | 1 | _B3 | 0 | . | 1 | _E3 | 1 | 1 | _G3 | 1 | 1 | _I6 | 0 (0%) | 0 (0%)     | 39 (100%)  | 0 (0%)    | 39  |
| 1 | 1 | _B3 | 0 | . | 1 | _E3 | 1 | 1 | _G4 | 1 | 1 | _I5 | 0 (0%) | 0 (0%)     | 44 (100%)  | 0 (0%)    | 44  |
| 1 | 1 | _B3 | 0 | . | 1 | _E3 | 1 | 1 | _G4 | 1 | 1 | _I6 | 0 (0%) | 0 (0%)     | 42 (100%)  | 0 (0%)    | 42  |
| 1 | 1 | _B3 | 0 | . | 1 | _E4 | 0 | 0 | _G4 | 0 | 0 | _I5 | 0 (0%) | 40 (100%)  | 0 (0%)     | 0 (0%)    | 40  |
| 1 | 1 | _B3 | 0 | . | 1 | _E4 | 0 | 0 | _G4 | 0 | 0 | _I6 | 0 (0%) | 46 (100%)  | 0 (0%)     | 0 (0%)    | 46  |
| 1 | 1 | _B3 | 0 | . | 1 | _E4 | 0 | 1 | _G3 | . | 0 | _I6 | 0 (0%) | 34 (100%)  | 0 (0%)     | 0 (0%)    | 34  |
| 1 | 1 | _B3 | 0 | . | 1 | _E4 | 0 | 1 | _G3 | . | 1 | _I5 | 0 (0%) | 0 (0%)     | 45 (100%)  | 0 (0%)    | 45  |

*Supplemental material is neither peer-reviewed nor thoroughly edited by CJASN. The authors alone are responsible for the accuracy and presentation of the material.*

|   |   |     |   |   |   |     |   |   |     |   |   |     |        |                 |                 |                 |     |
|---|---|-----|---|---|---|-----|---|---|-----|---|---|-----|--------|-----------------|-----------------|-----------------|-----|
| 1 | 1 | _B3 | 0 | . | 1 | _E4 | 0 | 1 | _G3 | 0 | 0 | _I5 | 0 (0%) | 23<br>(21.905%) | 82<br>(78.095%) | 0 (0%)          | 105 |
| 1 | 1 | _B3 | 0 | . | 1 | _E4 | 0 | 1 | _G3 | 0 | 0 | _I6 | 0 (0%) | 204<br>(100%)   | 0 (0%)          | 0 (0%)          | 204 |
| 1 | 1 | _B3 | 0 | . | 1 | _E4 | 0 | 1 | _G3 | 0 | 1 | _I5 | 0 (0%) | 0 (0%)          | 165<br>(100%)   | 0 (0%)          | 165 |
| 1 | 1 | _B3 | 0 | . | 1 | _E4 | 0 | 1 | _G4 | . | 0 | _I6 | 0 (0%) | 46 (100%)       | 0 (0%)          | 0 (0%)          | 46  |
| 1 | 1 | _B3 | 0 | . | 1 | _E4 | 0 | 1 | _G4 | . | 1 | _I5 | 0 (0%) | 0 (0%)          | 40 (100%)       | 0 (0%)          | 40  |
| 1 | 1 | _B3 | 0 | . | 1 | _E4 | 0 | 1 | _G4 | 0 | 0 | _I5 | 0 (0%) | 3<br>(5.769%)   | 49<br>(94.231%) | 0 (0%)          | 52  |
| 1 | 1 | _B3 | 0 | . | 1 | _E4 | 0 | 1 | _G4 | 0 | 0 | _I6 | 0 (0%) | 230<br>(100%)   | 0 (0%)          | 0 (0%)          | 230 |
| 1 | 1 | _B3 | 0 | . | 1 | _E4 | 0 | 1 | _G4 | 0 | 1 | _I5 | 0 (0%) | 0 (0%)          | 144<br>(100%)   | 0 (0%)          | 144 |
| 1 | 1 | _B3 | 0 | . | 1 | _E4 | 1 | 1 | _G3 | 1 | 1 | _I5 | 0 (0%) | 0 (0%)          | 45 (100%)       | 0 (0%)          | 45  |
| 1 | 1 | _B3 | 0 | . | 1 | _E4 | 1 | 1 | _G3 | 1 | 1 | _I6 | 0 (0%) | 0 (0%)          | 34 (100%)       | 0 (0%)          | 34  |
| 1 | 1 | _B3 | 0 | . | 1 | _E4 | 1 | 1 | _G4 | 1 | 1 | _I5 | 0 (0%) | 0 (0%)          | 40 (100%)       | 0 (0%)          | 40  |
| 1 | 1 | _B3 | 0 | . | 1 | _E4 | 1 | 1 | _G4 | 1 | 1 | _I6 | 0 (0%) | 0 (0%)          | 14<br>(30.435%) | 32<br>(69.565%) | 46  |
| 1 | 1 | _B3 | 0 | . | 1 | _E5 | 0 | 1 | _G3 | . | 0 | _I6 | 0 (0%) | 41 (100%)       | 0 (0%)          | 0 (0%)          | 41  |
| 1 | 1 | _B3 | 0 | . | 1 | _E5 | 0 | 1 | _G3 | . | 1 | _I5 | 0 (0%) | 0 (0%)          | 41 (100%)       | 0 (0%)          | 41  |
| 1 | 1 | _B3 | 0 | . | 1 | _E5 | 0 | 1 | _G3 | 0 | 0 | _I5 | 0 (0%) | 10<br>(16.393%) | 51<br>(83.607%) | 0 (0%)          | 61  |
| 1 | 1 | _B3 | 0 | . | 1 | _E5 | 0 | 1 | _G3 | 0 | 0 | _I6 | 0 (0%) | 209<br>(100%)   | 0 (0%)          | 0 (0%)          | 209 |
| 1 | 1 | _B3 | 0 | . | 1 | _E5 | 0 | 1 | _G3 | 0 | 1 | _I5 | 0 (0%) | 0 (0%)          | 152<br>(100%)   | 0 (0%)          | 152 |
| 1 | 1 | _B3 | 0 | . | 1 | _E5 | 0 | 1 | _G4 | . | 0 | _I6 | 0 (0%) | 40 (100%)       | 0 (0%)          | 0 (0%)          | 40  |
| 1 | 1 | _B3 | 0 | . | 1 | _E5 | 0 | 1 | _G4 | . | 1 | _I5 | 0 (0%) | 0 (0%)          | 47 (100%)       | 0 (0%)          | 47  |
| 1 | 1 | _B3 | 0 | . | 1 | _E5 | 0 | 1 | _G4 | 0 | 0 | _I5 | 0 (0%) | 3<br>(5.357%)   | 53<br>(94.643%) | 0 (0%)          | 56  |
| 1 | 1 | _B3 | 0 | . | 1 | _E5 | 0 | 1 | _G4 | 0 | 0 | _I6 | 0 (0%) | 205<br>(100%)   | 0 (0%)          | 0 (0%)          | 205 |

|   |   |     |   |   |   |     |   |   |     |   |   |     |             |               |              |            |     |
|---|---|-----|---|---|---|-----|---|---|-----|---|---|-----|-------------|---------------|--------------|------------|-----|
| 1 | 1 | _B3 | 0 | . | 1 | _E5 | 0 | 1 | _G4 | 0 | 1 | _I5 | 0 (0%)      | 0 (0%)        | 170 (100%)   | 0 (0%)     | 170 |
| 1 | 1 | _B3 | 0 | . | 1 | _E5 | 1 | 1 | _G3 | 1 | 1 | _I5 | 0 (0%)      | 0 (0%)        | 41 (100%)    | 0 (0%)     | 41  |
| 1 | 1 | _B3 | 0 | . | 1 | _E5 | 1 | 1 | _G3 | 1 | 1 | _I6 | 0 (0%)      | 0 (0%)        | 40 (97.561%) | 1 (2.439%) | 41  |
| 1 | 1 | _B3 | 0 | . | 1 | _E5 | 1 | 1 | _G4 | 1 | 1 | _I5 | 0 (0%)      | 0 (0%)        | 47 (100%)    | 0 (0%)     | 47  |
| 1 | 1 | _B3 | 0 | . | 1 | _E5 | 1 | 1 | _G4 | 1 | 1 | _I6 | 0 (0%)      | 0 (0%)        | 8 (20%)      | 32 (80%)   | 40  |
| 1 | 1 | _B3 | 0 | 0 | 0 | _E3 | 0 | 0 | _G3 | 0 | 0 | _I5 | 0 (0%)      | 82 (100%)     | 0 (0%)       | 0 (0%)     | 82  |
| 1 | 1 | _B3 | 0 | 0 | 0 | _E3 | 0 | 0 | _G3 | 0 | 0 | _I6 | 78 (100%)   | 0 (0%)        | 0 (0%)       | 0 (0%)     | 78  |
| 1 | 1 | _B3 | 0 | 0 | 0 | _E3 | 0 | 0 | _G4 | . | 0 | _I5 | 0 (0%)      | 132 (100%)    | 0 (0%)       | 0 (0%)     | 132 |
| 1 | 1 | _B3 | 0 | 0 | 0 | _E3 | 0 | 0 | _G4 | . | 0 | _I6 | 126 (100%)  | 0 (0%)        | 0 (0%)       | 0 (0%)     | 126 |
| 1 | 1 | _B3 | 0 | 0 | 0 | _E3 | 0 | 0 | _G4 | 0 | 0 | _I5 | 44 (9.091%) | 440 (90.909%) | 0 (0%)       | 0 (0%)     | 484 |
| 1 | 1 | _B3 | 0 | 0 | 0 | _E3 | 0 | 0 | _G4 | 0 | 0 | _I6 | 462 (100%)  | 0 (0%)        | 0 (0%)       | 0 (0%)     | 462 |
| 1 | 1 | _B3 | 0 | 0 | 0 | _E3 | 0 | 0 | _G4 | 1 | 0 | _I5 | 0 (0%)      | 44 (100%)     | 0 (0%)       | 0 (0%)     | 44  |
| 1 | 1 | _B3 | 0 | 0 | 0 | _E3 | 0 | 0 | _G4 | 1 | 1 | _I6 | 0 (0%)      | 0 (0%)        | 42 (100%)    | 0 (0%)     | 42  |
| 1 | 1 | _B3 | 0 | 0 | 0 | _E3 | 0 | 1 | _G3 | . | 0 | _I5 | 0 (0%)      | 164 (100%)    | 0 (0%)       | 0 (0%)     | 164 |
| 1 | 1 | _B3 | 0 | 0 | 0 | _E3 | 0 | 1 | _G3 | . | 0 | _I6 | 0 (0%)      | 156 (100%)    | 0 (0%)       | 0 (0%)     | 156 |
| 1 | 1 | _B3 | 0 | 0 | 0 | _E3 | 0 | 1 | _G3 | 0 | 0 | _I5 | 0 (0%)      | 533 (100%)    | 0 (0%)       | 0 (0%)     | 533 |
| 1 | 1 | _B3 | 0 | 0 | 0 | _E3 | 0 | 1 | _G3 | 0 | 0 | _I6 | 0 (0%)      | 546 (100%)    | 0 (0%)       | 0 (0%)     | 546 |
| 1 | 1 | _B3 | 0 | 0 | 0 | _E3 | 0 | 1 | _G3 | 0 | 1 | _I5 | 0 (0%)      | 0 (0%)        | 41 (100%)    | 0 (0%)     | 41  |
| 1 | 1 | _B3 | 0 | 0 | 0 | _E3 | 0 | 1 | _G3 | 1 | 0 | _I5 | 0 (0%)      | 41 (100%)     | 0 (0%)       | 0 (0%)     | 41  |
| 1 | 1 | _B3 | 0 | 0 | 0 | _E3 | 0 | 1 | _G3 | 1 | 1 | _I6 | 0 (0%)      | 0 (0%)        | 39 (100%)    | 0 (0%)     | 39  |
| 1 | 1 | _B3 | 0 | 0 | 0 | _E3 | 0 | 1 | _G4 | . | 0 | _I5 | 0 (0%)      | 0 (0%)        | 44 (100%)    | 0 (0%)     | 44  |

Supplemental material is neither peer-reviewed nor thoroughly edited by CJASN. The authors alone are responsible for the accuracy and presentation of the material.

|   |   |     |   |   |   |     |   |   |     |   |   |     |                |                |              |        |      |
|---|---|-----|---|---|---|-----|---|---|-----|---|---|-----|----------------|----------------|--------------|--------|------|
| 1 | 1 | _B3 | 0 | 0 | 0 | _E3 | 0 | 1 | _G4 | . | 0 | _I6 | 0 (0%)         | 42 (100%)      | 0 (0%)       | 0 (0%) | 42   |
| 1 | 1 | _B3 | 0 | 0 | 0 | _E3 | 0 | 1 | _G4 | 0 | 0 | _I5 | 0 (0%)         | 0 (0%)         | 176 (100%)   | 0 (0%) | 176  |
| 1 | 1 | _B3 | 0 | 0 | 0 | _E3 | 0 | 1 | _G4 | 0 | 0 | _I6 | 0 (0%)         | 210 (100%)     | 0 (0%)       | 0 (0%) | 210  |
| 1 | 1 | _B3 | 0 | 0 | 0 | _E3 | 0 | 1 | _G4 | 0 | 1 | _I5 | 0 (0%)         | 0 (0%)         | 44 (100%)    | 0 (0%) | 44   |
| 1 | 1 | _B3 | 0 | 0 | 0 | _E4 | 0 | . | _G3 | . | 0 | _I5 | 0 (0%)         | 15 (100%)      | 0 (0%)       | 0 (0%) | 15   |
| 1 | 1 | _B3 | 0 | 0 | 0 | _E4 | 0 | . | _G3 | . | 0 | _I6 | 0 (0%)         | 11 (100%)      | 0 (0%)       | 0 (0%) | 11   |
| 1 | 1 | _B3 | 0 | 0 | 0 | _E4 | 0 | . | _G4 | . | 0 | _I5 | 0 (0%)         | 12 (100%)      | 0 (0%)       | 0 (0%) | 12   |
| 1 | 1 | _B3 | 0 | 0 | 0 | _E4 | 0 | . | _G4 | . | 0 | _I6 | 0 (0%)         | 16 (100%)      | 0 (0%)       | 0 (0%) | 16   |
| 1 | 1 | _B3 | 0 | 0 | 0 | _E4 | 0 | 0 | _G3 | 0 | 0 | _I5 | 82 (91.111%)   | 8 (8.889%)     | 0 (0%)       | 0 (0%) | 90   |
| 1 | 1 | _B3 | 0 | 0 | 0 | _E4 | 0 | 0 | _G3 | 0 | 0 | _I6 | 68 (100%)      | 0 (0%)         | 0 (0%)       | 0 (0%) | 68   |
| 1 | 1 | _B3 | 0 | 0 | 0 | _E4 | 0 | 0 | _G4 | . | 0 | _I5 | 0 (0%)         | 175 (100%)     | 0 (0%)       | 0 (0%) | 175  |
| 1 | 1 | _B3 | 0 | 0 | 0 | _E4 | 0 | 0 | _G4 | . | 0 | _I6 | 168 (85.279%)  | 29 (14.721%)   | 0 (0%)       | 0 (0%) | 197  |
| 1 | 1 | _B3 | 0 | 0 | 0 | _E4 | 0 | 0 | _G4 | 0 | 0 | _I5 | 131 (9.576%)   | 1237 (90.424%) | 0 (0%)       | 0 (0%) | 1368 |
| 1 | 1 | _B3 | 0 | 0 | 0 | _E4 | 0 | 0 | _G4 | 0 | 0 | _I6 | 1493 (94.374%) | 89 (5.626%)    | 0 (0%)       | 0 (0%) | 1582 |
| 1 | 1 | _B3 | 0 | 0 | 0 | _E4 | 0 | 0 | _G4 | 1 | 0 | _I5 | 0 (0%)         | 40 (100%)      | 0 (0%)       | 0 (0%) | 40   |
| 1 | 1 | _B3 | 0 | 0 | 0 | _E4 | 0 | 0 | _G4 | 1 | 1 | _I6 | 0 (0%)         | 0 (0%)         | 46 (100%)    | 0 (0%) | 46   |
| 1 | 1 | _B3 | 0 | 0 | 0 | _E4 | 0 | 1 | _G3 | . | 0 | _I5 | 0 (0%)         | 429 (100%)     | 0 (0%)       | 0 (0%) | 429  |
| 1 | 1 | _B3 | 0 | 0 | 0 | _E4 | 0 | 1 | _G3 | . | 0 | _I6 | 0 (0%)         | 357 (100%)     | 0 (0%)       | 0 (0%) | 357  |
| 1 | 1 | _B3 | 0 | 0 | 0 | _E4 | 0 | 1 | _G3 | . | 1 | _I5 | 0 (0%)         | 3 (6.522%)     | 43 (93.478%) | 0 (0%) | 46   |
| 1 | 1 | _B3 | 0 | 0 | 0 | _E4 | 0 | 1 | _G3 | . | 1 | _I6 | 0 (0%)         | 0 (0%)         | 12 (100%)    | 0 (0%) | 12   |

Supplemental material is neither peer-reviewed nor thoroughly edited by CJASN. The authors alone are responsible for the accuracy and presentation of the material.

|   |   |     |   |   |   |     |   |   |     |   |   |     |        |                 |                  |        |      |
|---|---|-----|---|---|---|-----|---|---|-----|---|---|-----|--------|-----------------|------------------|--------|------|
| 1 | 1 | _B3 | 0 | 0 | 0 | _E4 | 0 | 1 | _G3 | 0 | 0 | _I5 | 0 (0%) | 2837<br>(100%)  | 0 (0%)           | 0 (0%) | 2837 |
| 1 | 1 | _B3 | 0 | 0 | 0 | _E4 | 0 | 1 | _G3 | 0 | 0 | _I6 | 0 (0%) | 2406<br>(100%)  | 0 (0%)           | 0 (0%) | 2406 |
| 1 | 1 | _B3 | 0 | 0 | 0 | _E4 | 0 | 1 | _G3 | 0 | 1 | _I5 | 0 (0%) | 15<br>(4.261%)  | 337<br>(95.739%) | 0 (0%) | 352  |
| 1 | 1 | _B3 | 0 | 0 | 0 | _E4 | 0 | 1 | _G3 | 1 | 0 | _I5 | 0 (0%) | 201<br>(100%)   | 0 (0%)           | 0 (0%) | 201  |
| 1 | 1 | _B3 | 0 | 0 | 0 | _E4 | 0 | 1 | _G3 | 1 | 0 | _I6 | 0 (0%) | 80 (100%)       | 0 (0%)           | 0 (0%) | 80   |
| 1 | 1 | _B3 | 0 | 0 | 0 | _E4 | 0 | 1 | _G3 | 1 | 1 | _I5 | 0 (0%) | 4<br>(8.889%)   | 41<br>(91.111%)  | 0 (0%) | 45   |
| 1 | 1 | _B3 | 0 | 0 | 0 | _E4 | 0 | 1 | _G3 | 1 | 1 | _I6 | 0 (0%) | 0 (0%)          | 120<br>(100%)    | 0 (0%) | 120  |
| 1 | 1 | _B3 | 0 | 0 | 0 | _E4 | 0 | 1 | _G4 | . | 0 | _I5 | 0 (0%) | 219<br>(100%)   | 0 (0%)           | 0 (0%) | 219  |
| 1 | 1 | _B3 | 0 | 0 | 0 | _E4 | 0 | 1 | _G4 | . | 0 | _I6 | 0 (0%) | 283<br>(100%)   | 0 (0%)           | 0 (0%) | 283  |
| 1 | 1 | _B3 | 0 | 0 | 0 | _E4 | 0 | 1 | _G4 | . | 1 | _I5 | 0 (0%) | 0 (0%)          | 43 (100%)        | 0 (0%) | 43   |
| 1 | 1 | _B3 | 0 | 0 | 0 | _E4 | 0 | 1 | _G4 | . | 1 | _I6 | 0 (0%) | 0 (0%)          | 16 (100%)        | 0 (0%) | 16   |
| 1 | 1 | _B3 | 0 | 0 | 0 | _E4 | 0 | 1 | _G4 | 0 | 0 | _I5 | 0 (0%) | 1227<br>(100%)  | 0 (0%)           | 0 (0%) | 1227 |
| 1 | 1 | _B3 | 0 | 0 | 0 | _E4 | 0 | 1 | _G4 | 0 | 0 | _I6 | 0 (0%) | 1728<br>(100%)  | 0 (0%)           | 0 (0%) | 1728 |
| 1 | 1 | _B3 | 0 | 0 | 0 | _E4 | 0 | 1 | _G4 | 0 | 1 | _I5 | 0 (0%) | 0 (0%)          | 292<br>(100%)    | 0 (0%) | 292  |
| 1 | 1 | _B3 | 0 | 0 | 0 | _E4 | 0 | 1 | _G4 | 1 | 0 | _I5 | 0 (0%) | 126<br>(100%)   | 0 (0%)           | 0 (0%) | 126  |
| 1 | 1 | _B3 | 0 | 0 | 0 | _E4 | 0 | 1 | _G4 | 1 | 0 | _I6 | 0 (0%) | 92 (100%)       | 0 (0%)           | 0 (0%) | 92   |
| 1 | 1 | _B3 | 0 | 0 | 0 | _E4 | 0 | 1 | _G4 | 1 | 1 | _I5 | 0 (0%) | 0 (0%)          | 35 (100%)        | 0 (0%) | 35   |
| 1 | 1 | _B3 | 0 | 0 | 0 | _E4 | 0 | 1 | _G4 | 1 | 1 | _I6 | 0 (0%) | 0 (0%)          | 109<br>(100%)    | 0 (0%) | 109  |
| 1 | 1 | _B3 | 0 | 0 | 0 | _E4 | 1 | 1 | _G3 | 0 | 0 | _I5 | 0 (0%) | 74<br>(96.104%) | 3<br>(3.896%)    | 0 (0%) | 77   |
| 1 | 1 | _B3 | 0 | 0 | 0 | _E4 | 1 | 1 | _G3 | 0 | 0 | _I6 | 0 (0%) | 142<br>(100%)   | 0 (0%)           | 0 (0%) | 142  |
| 1 | 1 | _B3 | 0 | 0 | 0 | _E4 | 1 | 1 | _G3 | 0 | 1 | _I5 | 0 (0%) | 0 (0%)          | 105<br>(100%)    | 0 (0%) | 105  |

Supplemental material is neither peer-reviewed nor thoroughly edited by CJASN. The authors alone are responsible for the accuracy and presentation of the material.

|   |   |     |   |   |   |     |   |   |     |   |   |     |               |                |           |        |      |
|---|---|-----|---|---|---|-----|---|---|-----|---|---|-----|---------------|----------------|-----------|--------|------|
| 1 | 1 | _B3 | 0 | 0 | 0 | _E4 | 1 | 1 | _G4 | 0 | 0 | _I5 | 0 (0%)        | 69 (100%)      | 0 (0%)    | 0 (0%) | 69   |
| 1 | 1 | _B3 | 0 | 0 | 0 | _E4 | 1 | 1 | _G4 | 0 | 0 | _I6 | 0 (0%)        | 188 (100%)     | 0 (0%)    | 0 (0%) | 188  |
| 1 | 1 | _B3 | 0 | 0 | 0 | _E4 | 1 | 1 | _G4 | 0 | 1 | _I5 | 0 (0%)        | 0 (0%)         | 91 (100%) | 0 (0%) | 91   |
| 1 | 1 | _B3 | 0 | 0 | 0 | _E5 | 0 | . | _G3 | . | 0 | _I5 | 0 (0%)        | 12 (100%)      | 0 (0%)    | 0 (0%) | 12   |
| 1 | 1 | _B3 | 0 | 0 | 0 | _E5 | 0 | . | _G3 | . | 0 | _I6 | 0 (0%)        | 17 (100%)      | 0 (0%)    | 0 (0%) | 17   |
| 1 | 1 | _B3 | 0 | 0 | 0 | _E5 | 0 | . | _G4 | . | 0 | _I5 | 0 (0%)        | 19 (100%)      | 0 (0%)    | 0 (0%) | 19   |
| 1 | 1 | _B3 | 0 | 0 | 0 | _E5 | 0 | . | _G4 | . | 0 | _I6 | 0 (0%)        | 11 (100%)      | 0 (0%)    | 0 (0%) | 11   |
| 1 | 1 | _B3 | 0 | 0 | 0 | _E5 | 0 | 0 | _G3 | . | 0 | _I6 | 5 (100%)      | 0 (0%)         | 0 (0%)    | 0 (0%) | 5    |
| 1 | 1 | _B3 | 0 | 0 | 0 | _E5 | 0 | 0 | _G3 | 0 | 0 | _I5 | 79 (96.341%)  | 3 (3.659%)     | 0 (0%)    | 0 (0%) | 82   |
| 1 | 1 | _B3 | 0 | 0 | 0 | _E5 | 0 | 0 | _G3 | 0 | 0 | _I6 | 113 (99.123%) | 1 (0.877%)     | 0 (0%)    | 0 (0%) | 114  |
| 1 | 1 | _B3 | 0 | 0 | 0 | _E5 | 0 | 0 | _G3 | 1 | 1 | _I6 | 0 (0%)        | 0 (0%)         | 1 (100%)  | 0 (0%) | 1    |
| 1 | 1 | _B3 | 0 | 0 | 0 | _E5 | 0 | 0 | _G4 | . | 0 | _I5 | 0 (0%)        | 204 (100%)     | 0 (0%)    | 0 (0%) | 204  |
| 1 | 1 | _B3 | 0 | 0 | 0 | _E5 | 0 | 0 | _G4 | . | 0 | _I6 | 164 (93.182%) | 12 (6.818%)    | 0 (0%)    | 0 (0%) | 176  |
| 1 | 1 | _B3 | 0 | 0 | 0 | _E5 | 0 | 0 | _G4 | 0 | 0 | _I5 | 165 (10.198%) | 1453 (89.802%) | 0 (0%)    | 0 (0%) | 1618 |
| 1 | 1 | _B3 | 0 | 0 | 0 | _E5 | 0 | 0 | _G4 | 0 | 0 | _I6 | 1320 (96.35%) | 50 (3.65%)     | 0 (0%)    | 0 (0%) | 1370 |
| 1 | 1 | _B3 | 0 | 0 | 0 | _E5 | 0 | 0 | _G4 | 1 | 0 | _I5 | 0 (0%)        | 47 (100%)      | 0 (0%)    | 0 (0%) | 47   |
| 1 | 1 | _B3 | 0 | 0 | 0 | _E5 | 0 | 0 | _G4 | 1 | 1 | _I6 | 0 (0%)        | 0 (0%)         | 40 (100%) | 0 (0%) | 40   |
| 1 | 1 | _B3 | 0 | 0 | 0 | _E5 | 0 | 1 | _G3 | . | 0 | _I5 | 0 (0%)        | 401 (100%)     | 0 (0%)    | 0 (0%) | 401  |
| 1 | 1 | _B3 | 0 | 0 | 0 | _E5 | 0 | 1 | _G3 | . | 0 | _I6 | 0 (0%)        | 406 (100%)     | 0 (0%)    | 0 (0%) | 406  |
| 1 | 1 | _B3 | 0 | 0 | 0 | _E5 | 0 | 1 | _G3 | . | 1 | _I5 | 0 (0%)        | 0 (0%)         | 40 (100%) | 0 (0%) | 40   |

Supplemental material is neither peer-reviewed nor thoroughly edited by CJASN. The authors alone are responsible for the accuracy and presentation of the material.

|   |   |     |   |   |   |     |   |   |     |   |   |     |        |              |               |        |      |
|---|---|-----|---|---|---|-----|---|---|-----|---|---|-----|--------|--------------|---------------|--------|------|
| 1 | 1 | _B3 | 0 | 0 | 0 | _E5 | 0 | 1 | _G3 | . | 1 | _I6 | 0 (0%) | 0 (0%)       | 12 (100%)     | 0 (0%) | 12   |
| 1 | 1 | _B3 | 0 | 0 | 0 | _E5 | 0 | 1 | _G3 | 0 | 0 | _I5 | 0 (0%) | 2547 (100%)  | 0 (0%)        | 0 (0%) | 2547 |
| 1 | 1 | _B3 | 0 | 0 | 0 | _E5 | 0 | 1 | _G3 | 0 | 0 | _I6 | 0 (0%) | 2825 (100%)  | 0 (0%)        | 0 (0%) | 2825 |
| 1 | 1 | _B3 | 0 | 0 | 0 | _E5 | 0 | 1 | _G3 | 0 | 1 | _I5 | 0 (0%) | 5 (1.511%)   | 326 (98.489%) | 0 (0%) | 331  |
| 1 | 1 | _B3 | 0 | 0 | 0 | _E5 | 0 | 1 | _G3 | 1 | 0 | _I5 | 0 (0%) | 177 (100%)   | 0 (0%)        | 0 (0%) | 177  |
| 1 | 1 | _B3 | 0 | 0 | 0 | _E5 | 0 | 1 | _G3 | 1 | 0 | _I6 | 0 (0%) | 80 (100%)    | 0 (0%)        | 0 (0%) | 80   |
| 1 | 1 | _B3 | 0 | 0 | 0 | _E5 | 0 | 1 | _G3 | 1 | 1 | _I5 | 0 (0%) | 2 (4.878%)   | 39 (95.122%)  | 0 (0%) | 41   |
| 1 | 1 | _B3 | 0 | 0 | 0 | _E5 | 0 | 1 | _G3 | 1 | 1 | _I6 | 0 (0%) | 0 (0%)       | 137 (100%)    | 0 (0%) | 137  |
| 1 | 1 | _B3 | 0 | 0 | 0 | _E5 | 0 | 1 | _G4 | . | 0 | _I5 | 0 (0%) | 252 (100%)   | 0 (0%)        | 0 (0%) | 252  |
| 1 | 1 | _B3 | 0 | 0 | 0 | _E5 | 0 | 1 | _G4 | . | 0 | _I6 | 0 (0%) | 247 (100%)   | 0 (0%)        | 0 (0%) | 247  |
| 1 | 1 | _B3 | 0 | 0 | 0 | _E5 | 0 | 1 | _G4 | . | 1 | _I5 | 0 (0%) | 0 (0%)       | 46 (100%)     | 0 (0%) | 46   |
| 1 | 1 | _B3 | 0 | 0 | 0 | _E5 | 0 | 1 | _G4 | . | 1 | _I6 | 0 (0%) | 0 (0%)       | 14 (100%)     | 0 (0%) | 14   |
| 1 | 1 | _B3 | 0 | 0 | 0 | _E5 | 0 | 1 | _G4 | 0 | 0 | _I5 | 0 (0%) | 1452 (100%)  | 0 (0%)        | 0 (0%) | 1452 |
| 1 | 1 | _B3 | 0 | 0 | 0 | _E5 | 0 | 1 | _G4 | 0 | 0 | _I6 | 0 (0%) | 1505 (100%)  | 0 (0%)        | 0 (0%) | 1505 |
| 1 | 1 | _B3 | 0 | 0 | 0 | _E5 | 0 | 1 | _G4 | 0 | 1 | _I5 | 0 (0%) | 0 (0%)       | 349 (100%)    | 0 (0%) | 349  |
| 1 | 1 | _B3 | 0 | 0 | 0 | _E5 | 0 | 1 | _G4 | 1 | 0 | _I5 | 0 (0%) | 153 (100%)   | 0 (0%)        | 0 (0%) | 153  |
| 1 | 1 | _B3 | 0 | 0 | 0 | _E5 | 0 | 1 | _G4 | 1 | 0 | _I6 | 0 (0%) | 86 (100%)    | 0 (0%)        | 0 (0%) | 86   |
| 1 | 1 | _B3 | 0 | 0 | 0 | _E5 | 0 | 1 | _G4 | 1 | 1 | _I5 | 0 (0%) | 0 (0%)       | 50 (100%)     | 0 (0%) | 50   |
| 1 | 1 | _B3 | 0 | 0 | 0 | _E5 | 0 | 1 | _G4 | 1 | 1 | _I6 | 0 (0%) | 0 (0%)       | 98 (100%)     | 0 (0%) | 98   |
| 1 | 1 | _B3 | 0 | 0 | 0 | _E5 | 1 | 1 | _G3 | 0 | 0 | _I5 | 0 (0%) | 69 (95.833%) | 3 (4.167%)    | 0 (0%) | 72   |
| 1 | 1 | _B3 | 0 | 0 | 0 | _E5 | 1 | 1 | _G3 | 0 | 0 | _I6 | 0 (0%) | 157 (100%)   | 0 (0%)        | 0 (0%) | 157  |

*Supplemental material is neither peer-reviewed nor thoroughly edited by CJASN. The authors alone are responsible for the accuracy and presentation of the material.*

|   |   |     |   |   |   |     |   |   |     |   |   |     |        |                |                |        |      |
|---|---|-----|---|---|---|-----|---|---|-----|---|---|-----|--------|----------------|----------------|--------|------|
| 1 | 1 | _B3 | 0 | 0 | 0 | _E5 | 1 | 1 | _G3 | 0 | 1 | _I5 | 0 (0%) | 0 (0%)         | 105<br>(100%)  | 0 (0%) | 105  |
| 1 | 1 | _B3 | 0 | 0 | 0 | _E5 | 1 | 1 | _G4 | 0 | 0 | _I5 | 0 (0%) | 83 (100%)      | 0 (0%)         | 0 (0%) | 83   |
| 1 | 1 | _B3 | 0 | 0 | 0 | _E5 | 1 | 1 | _G4 | 0 | 0 | _I6 | 0 (0%) | 156<br>(100%)  | 0 (0%)         | 0 (0%) | 156  |
| 1 | 1 | _B3 | 0 | 0 | 0 | _E5 | 1 | 1 | _G4 | 0 | 1 | _I5 | 0 (0%) | 0 (0%)         | 115<br>(100%)  | 0 (0%) | 115  |
| 1 | 1 | _B3 | 0 | 0 | 1 | _E3 | 0 | . | _G3 | . | 0 | _I5 | 0 (0%) | 0 (0%)         | 41 (100%)      | 0 (0%) | 41   |
| 1 | 1 | _B3 | 0 | 0 | 1 | _E3 | 0 | . | _G3 | . | 0 | _I6 | 0 (0%) | 39 (100%)      | 0 (0%)         | 0 (0%) | 39   |
| 1 | 1 | _B3 | 0 | 0 | 1 | _E3 | 0 | . | _G4 | . | 0 | _I5 | 0 (0%) | 0 (0%)         | 44 (100%)      | 0 (0%) | 44   |
| 1 | 1 | _B3 | 0 | 0 | 1 | _E3 | 0 | . | _G4 | . | 0 | _I6 | 0 (0%) | 42 (100%)      | 0 (0%)         | 0 (0%) | 42   |
| 1 | 1 | _B3 | 0 | 0 | 1 | _E3 | 0 | 0 | _G4 | . | 0 | _I5 | 0 (0%) | 88 (100%)      | 0 (0%)         | 0 (0%) | 88   |
| 1 | 1 | _B3 | 0 | 0 | 1 | _E3 | 0 | 0 | _G4 | . | 0 | _I6 | 0 (0%) | 84 (100%)      | 0 (0%)         | 0 (0%) | 84   |
| 1 | 1 | _B3 | 0 | 0 | 1 | _E3 | 0 | 0 | _G4 | 0 | 0 | _I5 | 0 (0%) | 1100<br>(100%) | 0 (0%)         | 0 (0%) | 1100 |
| 1 | 1 | _B3 | 0 | 0 | 1 | _E3 | 0 | 0 | _G4 | 0 | 0 | _I6 | 0 (0%) | 1050<br>(100%) | 0 (0%)         | 0 (0%) | 1050 |
| 1 | 1 | _B3 | 0 | 0 | 1 | _E3 | 0 | 1 | _G3 | . | 0 | _I5 | 0 (0%) | 0 (0%)         | 369<br>(100%)  | 0 (0%) | 369  |
| 1 | 1 | _B3 | 0 | 0 | 1 | _E3 | 0 | 1 | _G3 | . | 0 | _I6 | 0 (0%) | 702<br>(100%)  | 0 (0%)         | 0 (0%) | 702  |
| 1 | 1 | _B3 | 0 | 0 | 1 | _E3 | 0 | 1 | _G3 | . | 1 | _I5 | 0 (0%) | 0 (0%)         | 410<br>(100%)  | 0 (0%) | 410  |
| 1 | 1 | _B3 | 0 | 0 | 1 | _E3 | 0 | 1 | _G3 | . | 1 | _I6 | 0 (0%) | 0 (0%)         | 39 (100%)      | 0 (0%) | 39   |
| 1 | 1 | _B3 | 0 | 0 | 1 | _E3 | 0 | 1 | _G3 | 0 | 0 | _I5 | 0 (0%) | 0 (0%)         | 2706<br>(100%) | 0 (0%) | 2706 |
| 1 | 1 | _B3 | 0 | 0 | 1 | _E3 | 0 | 1 | _G3 | 0 | 0 | _I6 | 0 (0%) | 3666<br>(100%) | 0 (0%)         | 0 (0%) | 3666 |
| 1 | 1 | _B3 | 0 | 0 | 1 | _E3 | 0 | 1 | _G3 | 0 | 1 | _I5 | 0 (0%) | 0 (0%)         | 1148<br>(100%) | 0 (0%) | 1148 |
| 1 | 1 | _B3 | 0 | 0 | 1 | _E3 | 0 | 1 | _G3 | 1 | 0 | _I5 | 0 (0%) | 0 (0%)         | 246<br>(100%)  | 0 (0%) | 246  |
| 1 | 1 | _B3 | 0 | 0 | 1 | _E3 | 0 | 1 | _G3 | 1 | 0 | _I6 | 0 (0%) | 195<br>(100%)  | 0 (0%)         | 0 (0%) | 195  |

|   |   |     |   |   |   |     |   |   |     |   |   |     |        |                |                |           |      |
|---|---|-----|---|---|---|-----|---|---|-----|---|---|-----|--------|----------------|----------------|-----------|------|
| 1 | 1 | _B3 | 0 | 0 | 1 | _E3 | 0 | 1 | _G3 | 1 | 1 | _I5 | 0 (0%) | 0 (0%)         | 246<br>(100%)  | 0 (0%)    | 246  |
| 1 | 1 | _B3 | 0 | 0 | 1 | _E3 | 0 | 1 | _G3 | 1 | 1 | _I6 | 0 (0%) | 0 (0%)         | 273<br>(100%)  | 0 (0%)    | 273  |
| 1 | 1 | _B3 | 0 | 0 | 1 | _E3 | 0 | 1 | _G4 | . | 0 | _I5 | 0 (0%) | 0 (0%)         | 308<br>(100%)  | 0 (0%)    | 308  |
| 1 | 1 | _B3 | 0 | 0 | 1 | _E3 | 0 | 1 | _G4 | . | 0 | _I6 | 0 (0%) | 672<br>(100%)  | 0 (0%)         | 0 (0%)    | 672  |
| 1 | 1 | _B3 | 0 | 0 | 1 | _E3 | 0 | 1 | _G4 | . | 1 | _I5 | 0 (0%) | 0 (0%)         | 440<br>(100%)  | 0 (0%)    | 440  |
| 1 | 1 | _B3 | 0 | 0 | 1 | _E3 | 0 | 1 | _G4 | . | 1 | _I6 | 0 (0%) | 0 (0%)         | 42 (100%)      | 0 (0%)    | 42   |
| 1 | 1 | _B3 | 0 | 0 | 1 | _E3 | 0 | 1 | _G4 | 0 | 0 | _I5 | 0 (0%) | 0 (0%)         | 1804<br>(100%) | 0 (0%)    | 1804 |
| 1 | 1 | _B3 | 0 | 0 | 1 | _E3 | 0 | 1 | _G4 | 0 | 0 | _I6 | 0 (0%) | 2898<br>(100%) | 0 (0%)         | 0 (0%)    | 2898 |
| 1 | 1 | _B3 | 0 | 0 | 1 | _E3 | 0 | 1 | _G4 | 0 | 1 | _I5 | 0 (0%) | 0 (0%)         | 1232<br>(100%) | 0 (0%)    | 1232 |
| 1 | 1 | _B3 | 0 | 0 | 1 | _E3 | 0 | 1 | _G4 | 1 | 0 | _I5 | 0 (0%) | 0 (0%)         | 264<br>(100%)  | 0 (0%)    | 264  |
| 1 | 1 | _B3 | 0 | 0 | 1 | _E3 | 0 | 1 | _G4 | 1 | 0 | _I6 | 0 (0%) | 210<br>(100%)  | 0 (0%)         | 0 (0%)    | 210  |
| 1 | 1 | _B3 | 0 | 0 | 1 | _E3 | 0 | 1 | _G4 | 1 | 1 | _I5 | 0 (0%) | 0 (0%)         | 264<br>(100%)  | 0 (0%)    | 264  |
| 1 | 1 | _B3 | 0 | 0 | 1 | _E3 | 0 | 1 | _G4 | 1 | 1 | _I6 | 0 (0%) | 0 (0%)         | 294<br>(100%)  | 0 (0%)    | 294  |
| 1 | 1 | _B3 | 0 | 0 | 1 | _E3 | 1 | 1 | _G3 | 0 | 0 | _I5 | 0 (0%) | 0 (0%)         | 123<br>(100%)  | 0 (0%)    | 123  |
| 1 | 1 | _B3 | 0 | 0 | 1 | _E3 | 1 | 1 | _G3 | 0 | 0 | _I6 | 0 (0%) | 468<br>(100%)  | 0 (0%)         | 0 (0%)    | 468  |
| 1 | 1 | _B3 | 0 | 0 | 1 | _E3 | 1 | 1 | _G3 | 0 | 1 | _I5 | 0 (0%) | 0 (0%)         | 369<br>(100%)  | 0 (0%)    | 369  |
| 1 | 1 | _B3 | 0 | 0 | 1 | _E3 | 1 | 1 | _G3 | 1 | 1 | _I5 | 0 (0%) | 0 (0%)         | 0 (0%)         | 41 (100%) | 41   |
| 1 | 1 | _B3 | 0 | 0 | 1 | _E3 | 1 | 1 | _G3 | 1 | 1 | _I6 | 0 (0%) | 0 (0%)         | 39 (100%)      | 0 (0%)    | 39   |
| 1 | 1 | _B3 | 0 | 0 | 1 | _E3 | 1 | 1 | _G4 | 0 | 0 | _I5 | 0 (0%) | 0 (0%)         | 132<br>(100%)  | 0 (0%)    | 132  |
| 1 | 1 | _B3 | 0 | 0 | 1 | _E3 | 1 | 1 | _G4 | 0 | 0 | _I6 | 0 (0%) | 504<br>(100%)  | 0 (0%)         | 0 (0%)    | 504  |
| 1 | 1 | _B3 | 0 | 0 | 1 | _E3 | 1 | 1 | _G4 | 0 | 1 | _I5 | 0 (0%) | 0 (0%)         | 396<br>(100%)  | 0 (0%)    | 396  |

*Supplemental material is neither peer-reviewed nor thoroughly edited by CJASN. The authors alone are responsible for the accuracy and presentation of the material.*

|   |   |     |   |   |   |     |   |   |     |   |   |     |        |                  |                  |           |      |
|---|---|-----|---|---|---|-----|---|---|-----|---|---|-----|--------|------------------|------------------|-----------|------|
| 1 | 1 | _B3 | 0 | 0 | 1 | _E3 | 1 | 1 | _G4 | 1 | 1 | _I5 | 0 (0%) | 0 (0%)           | 0 (0%)           | 44 (100%) | 44   |
| 1 | 1 | _B3 | 0 | 0 | 1 | _E3 | 1 | 1 | _G4 | 1 | 1 | _I6 | 0 (0%) | 0 (0%)           | 42 (100%)        | 0 (0%)    | 42   |
| 1 | 1 | _B3 | 0 | 0 | 1 | _E4 | 0 | . | _G3 | . | 0 | _I5 | 0 (0%) | 6 (20%)          | 24 (80%)         | 0 (0%)    | 30   |
| 1 | 1 | _B3 | 0 | 0 | 1 | _E4 | 0 | . | _G3 | . | 0 | _I6 | 0 (0%) | 23 (100%)        | 0 (0%)           | 0 (0%)    | 23   |
| 1 | 1 | _B3 | 0 | 0 | 1 | _E4 | 0 | . | _G4 | . | 0 | _I5 | 0 (0%) | 9<br>(32.143%)   | 19<br>(67.857%)  | 0 (0%)    | 28   |
| 1 | 1 | _B3 | 0 | 0 | 1 | _E4 | 0 | . | _G4 | . | 0 | _I6 | 0 (0%) | 30 (100%)        | 0 (0%)           | 0 (0%)    | 30   |
| 1 | 1 | _B3 | 0 | 0 | 1 | _E4 | 0 | 0 | _G4 | . | 0 | _I5 | 0 (0%) | 25 (100%)        | 0 (0%)           | 0 (0%)    | 25   |
| 1 | 1 | _B3 | 0 | 0 | 1 | _E4 | 0 | 0 | _G4 | . | 0 | _I6 | 0 (0%) | 33 (100%)        | 0 (0%)           | 0 (0%)    | 33   |
| 1 | 1 | _B3 | 0 | 0 | 1 | _E4 | 0 | 0 | _G4 | 0 | 0 | _I5 | 0 (0%) | 72 (100%)        | 0 (0%)           | 0 (0%)    | 72   |
| 1 | 1 | _B3 | 0 | 0 | 1 | _E4 | 0 | 0 | _G4 | 0 | 0 | _I6 | 0 (0%) | 74 (100%)        | 0 (0%)           | 0 (0%)    | 74   |
| 1 | 1 | _B3 | 0 | 0 | 1 | _E4 | 0 | 1 | _G3 | . | 0 | _I5 | 0 (0%) | 32<br>(20.513%)  | 124<br>(79.487%) | 0 (0%)    | 156  |
| 1 | 1 | _B3 | 0 | 0 | 1 | _E4 | 0 | 1 | _G3 | . | 0 | _I6 | 0 (0%) | 391<br>(100%)    | 0 (0%)           | 0 (0%)    | 391  |
| 1 | 1 | _B3 | 0 | 0 | 1 | _E4 | 0 | 1 | _G3 | . | 1 | _I5 | 0 (0%) | 0 (0%)           | 404<br>(100%)    | 0 (0%)    | 404  |
| 1 | 1 | _B3 | 0 | 0 | 1 | _E4 | 0 | 1 | _G3 | . | 1 | _I6 | 0 (0%) | 0 (0%)           | 22 (100%)        | 0 (0%)    | 22   |
| 1 | 1 | _B3 | 0 | 0 | 1 | _E4 | 0 | 1 | _G3 | 0 | 0 | _I5 | 0 (0%) | 143<br>(19.916%) | 575<br>(80.084%) | 0 (0%)    | 718  |
| 1 | 1 | _B3 | 0 | 0 | 1 | _E4 | 0 | 1 | _G3 | 0 | 0 | _I6 | 0 (0%) | 1266<br>(100%)   | 0 (0%)           | 0 (0%)    | 1266 |
| 1 | 1 | _B3 | 0 | 0 | 1 | _E4 | 0 | 1 | _G3 | 0 | 1 | _I5 | 0 (0%) | 0 (0%)           | 953<br>(100%)    | 0 (0%)    | 953  |
| 1 | 1 | _B3 | 0 | 0 | 1 | _E4 | 0 | 1 | _G3 | 1 | 0 | _I5 | 0 (0%) | 22<br>(19.298%)  | 92<br>(80.702%)  | 0 (0%)    | 114  |
| 1 | 1 | _B3 | 0 | 0 | 1 | _E4 | 0 | 1 | _G3 | 1 | 0 | _I6 | 0 (0%) | 90 (100%)        | 0 (0%)           | 0 (0%)    | 90   |
| 1 | 1 | _B3 | 0 | 0 | 1 | _E4 | 0 | 1 | _G3 | 1 | 1 | _I5 | 0 (0%) | 0 (0%)           | 225<br>(100%)    | 0 (0%)    | 225  |
| 1 | 1 | _B3 | 0 | 0 | 1 | _E4 | 0 | 1 | _G3 | 1 | 1 | _I6 | 0 (0%) | 0 (0%)           | 152<br>(100%)    | 0 (0%)    | 152  |

Supplemental material is neither peer-reviewed nor thoroughly edited by CJASN. The authors alone are responsible for the accuracy and presentation of the material.

|   |   |     |   |   |   |     |   |   |     |   |   |     |        |                 |                  |                 |      |
|---|---|-----|---|---|---|-----|---|---|-----|---|---|-----|--------|-----------------|------------------|-----------------|------|
| 1 | 1 | _B3 | 0 | 0 | 1 | _E4 | 0 | 1 | _G4 | . | 0 | _I5 | 0 (0%) | 3 (2.97%)       | 98<br>(97.03%)   | 0 (0%)          | 101  |
| 1 | 1 | _B3 | 0 | 0 | 1 | _E4 | 0 | 1 | _G4 | . | 0 | _I6 | 0 (0%) | 499<br>(100%)   | 0 (0%)           | 0 (0%)          | 499  |
| 1 | 1 | _B3 | 0 | 0 | 1 | _E4 | 0 | 1 | _G4 | . | 1 | _I5 | 0 (0%) | 0 (0%)          | 357<br>(100%)    | 0 (0%)          | 357  |
| 1 | 1 | _B3 | 0 | 0 | 1 | _E4 | 0 | 1 | _G4 | . | 1 | _I6 | 0 (0%) | 0 (0%)          | 30 (100%)        | 0 (0%)          | 30   |
| 1 | 1 | _B3 | 0 | 0 | 1 | _E4 | 0 | 1 | _G4 | 0 | 0 | _I5 | 0 (0%) | 12<br>(2.094%)  | 561<br>(97.906%) | 0 (0%)          | 573  |
| 1 | 1 | _B3 | 0 | 0 | 1 | _E4 | 0 | 1 | _G4 | 0 | 0 | _I6 | 0 (0%) | 1676<br>(100%)  | 0 (0%)           | 0 (0%)          | 1676 |
| 1 | 1 | _B3 | 0 | 0 | 1 | _E4 | 0 | 1 | _G4 | 0 | 1 | _I5 | 0 (0%) | 0 (0%)          | 868<br>(100%)    | 0 (0%)          | 868  |
| 1 | 1 | _B3 | 0 | 0 | 1 | _E4 | 0 | 1 | _G4 | 1 | 0 | _I5 | 0 (0%) | 13<br>(11.404%) | 101<br>(88.596%) | 0 (0%)          | 114  |
| 1 | 1 | _B3 | 0 | 0 | 1 | _E4 | 0 | 1 | _G4 | 1 | 0 | _I6 | 0 (0%) | 138<br>(100%)   | 0 (0%)           | 0 (0%)          | 138  |
| 1 | 1 | _B3 | 0 | 0 | 1 | _E4 | 0 | 1 | _G4 | 1 | 1 | _I5 | 0 (0%) | 0 (0%)          | 205<br>(100%)    | 0 (0%)          | 205  |
| 1 | 1 | _B3 | 0 | 0 | 1 | _E4 | 0 | 1 | _G4 | 1 | 1 | _I6 | 0 (0%) | 0 (0%)          | 213<br>(100%)    | 0 (0%)          | 213  |
| 1 | 1 | _B3 | 0 | 0 | 1 | _E4 | 1 | 1 | _G3 | 0 | 0 | _I5 | 0 (0%) | 0 (0%)          | 58 (100%)        | 0 (0%)          | 58   |
| 1 | 1 | _B3 | 0 | 0 | 1 | _E4 | 1 | 1 | _G3 | 0 | 0 | _I6 | 0 (0%) | 266<br>(100%)   | 0 (0%)           | 0 (0%)          | 266  |
| 1 | 1 | _B3 | 0 | 0 | 1 | _E4 | 1 | 1 | _G3 | 0 | 1 | _I5 | 0 (0%) | 0 (0%)          | 300<br>(100%)    | 0 (0%)          | 300  |
| 1 | 1 | _B3 | 0 | 0 | 1 | _E4 | 1 | 1 | _G3 | 1 | 1 | _I5 | 0 (0%) | 0 (0%)          | 41<br>(91.111%)  | 4<br>(8.889%)   | 45   |
| 1 | 1 | _B3 | 0 | 0 | 1 | _E4 | 1 | 1 | _G3 | 1 | 1 | _I6 | 0 (0%) | 0 (0%)          | 33<br>(97.059%)  | 1<br>(2.941%)   | 34   |
| 1 | 1 | _B3 | 0 | 0 | 1 | _E4 | 1 | 1 | _G4 | 0 | 0 | _I5 | 0 (0%) | 0 (0%)          | 51 (100%)        | 0 (0%)          | 51   |
| 1 | 1 | _B3 | 0 | 0 | 1 | _E4 | 1 | 1 | _G4 | 0 | 0 | _I6 | 0 (0%) | 364<br>(100%)   | 0 (0%)           | 0 (0%)          | 364  |
| 1 | 1 | _B3 | 0 | 0 | 1 | _E4 | 1 | 1 | _G4 | 0 | 1 | _I5 | 0 (0%) | 0 (0%)          | 269<br>(100%)    | 0 (0%)          | 269  |
| 1 | 1 | _B3 | 0 | 0 | 1 | _E4 | 1 | 1 | _G4 | 1 | 1 | _I5 | 0 (0%) | 0 (0%)          | 40 (100%)        | 0 (0%)          | 40   |
| 1 | 1 | _B3 | 0 | 0 | 1 | _E4 | 1 | 1 | _G4 | 1 | 1 | _I6 | 0 (0%) | 0 (0%)          | 3<br>(6.522%)    | 43<br>(93.478%) | 46   |

|   |   |     |   |   |   |     |   |   |     |   |   |     |        |                 |                  |        |      |
|---|---|-----|---|---|---|-----|---|---|-----|---|---|-----|--------|-----------------|------------------|--------|------|
| 1 | 1 | _B3 | 0 | 0 | 1 | _E5 | 0 | . | _G3 | . | 0 | _I5 | 0 (0%) | 4<br>(13.793%)  | 25<br>(86.207%)  | 0 (0%) | 29   |
| 1 | 1 | _B3 | 0 | 0 | 1 | _E5 | 0 | . | _G3 | . | 0 | _I6 | 0 (0%) | 24 (100%)       | 0 (0%)           | 0 (0%) | 24   |
| 1 | 1 | _B3 | 0 | 0 | 1 | _E5 | 0 | . | _G4 | . | 0 | _I5 | 0 (0%) | 1<br>(3.571%)   | 27<br>(96.429%)  | 0 (0%) | 28   |
| 1 | 1 | _B3 | 0 | 0 | 1 | _E5 | 0 | . | _G4 | . | 0 | _I6 | 0 (0%) | 29 (100%)       | 0 (0%)           | 0 (0%) | 29   |
| 1 | 1 | _B3 | 0 | 0 | 1 | _E5 | 0 | 0 | _G3 | 0 | 0 | _I6 | 0 (0%) | 2 (100%)        | 0 (0%)           | 0 (0%) | 2    |
| 1 | 1 | _B3 | 0 | 0 | 1 | _E5 | 0 | 0 | _G4 | . | 0 | _I5 | 0 (0%) | 31 (100%)       | 0 (0%)           | 0 (0%) | 31   |
| 1 | 1 | _B3 | 0 | 0 | 1 | _E5 | 0 | 0 | _G4 | . | 0 | _I6 | 0 (0%) | 24 (100%)       | 0 (0%)           | 0 (0%) | 24   |
| 1 | 1 | _B3 | 0 | 0 | 1 | _E5 | 0 | 0 | _G4 | 0 | 0 | _I5 | 0 (0%) | 74 (100%)       | 0 (0%)           | 0 (0%) | 74   |
| 1 | 1 | _B3 | 0 | 0 | 1 | _E5 | 0 | 0 | _G4 | 0 | 0 | _I6 | 0 (0%) | 70 (100%)       | 0 (0%)           | 0 (0%) | 70   |
| 1 | 1 | _B3 | 0 | 0 | 1 | _E5 | 0 | 1 | _G3 | . | 0 | _I5 | 0 (0%) | 22<br>(16.667%) | 110<br>(83.333%) | 0 (0%) | 132  |
| 1 | 1 | _B3 | 0 | 0 | 1 | _E5 | 0 | 1 | _G3 | . | 0 | _I6 | 0 (0%) | 491<br>(100%)   | 0 (0%)           | 0 (0%) | 491  |
| 1 | 1 | _B3 | 0 | 0 | 1 | _E5 | 0 | 1 | _G3 | . | 1 | _I5 | 0 (0%) | 0 (0%)          | 370<br>(100%)    | 0 (0%) | 370  |
| 1 | 1 | _B3 | 0 | 0 | 1 | _E5 | 0 | 1 | _G3 | . | 1 | _I6 | 0 (0%) | 0 (0%)          | 29 (100%)        | 0 (0%) | 29   |
| 1 | 1 | _B3 | 0 | 0 | 1 | _E5 | 0 | 1 | _G3 | 0 | 0 | _I5 | 0 (0%) | 96<br>(13.873%) | 596<br>(86.127%) | 0 (0%) | 692  |
| 1 | 1 | _B3 | 0 | 0 | 1 | _E5 | 0 | 1 | _G3 | 0 | 0 | _I6 | 0 (0%) | 1569<br>(100%)  | 0 (0%)           | 0 (0%) | 1569 |
| 1 | 1 | _B3 | 0 | 0 | 1 | _E5 | 0 | 1 | _G3 | 0 | 1 | _I5 | 0 (0%) | 0 (0%)          | 858<br>(100%)    | 0 (0%) | 858  |
| 1 | 1 | _B3 | 0 | 0 | 1 | _E5 | 0 | 1 | _G3 | 1 | 0 | _I5 | 0 (0%) | 12<br>(10.909%) | 98<br>(89.091%)  | 0 (0%) | 110  |
| 1 | 1 | _B3 | 0 | 0 | 1 | _E5 | 0 | 1 | _G3 | 1 | 0 | _I6 | 0 (0%) | 125<br>(100%)   | 0 (0%)           | 0 (0%) | 125  |
| 1 | 1 | _B3 | 0 | 0 | 1 | _E5 | 0 | 1 | _G3 | 1 | 1 | _I5 | 0 (0%) | 0 (0%)          | 205<br>(100%)    | 0 (0%) | 205  |
| 1 | 1 | _B3 | 0 | 0 | 1 | _E5 | 0 | 1 | _G3 | 1 | 1 | _I6 | 0 (0%) | 0 (0%)          | 190<br>(100%)    | 0 (0%) | 190  |
| 1 | 1 | _B3 | 0 | 0 | 1 | _E5 | 0 | 1 | _G4 | . | 0 | _I5 | 0 (0%) | 1<br>(0.806%)   | 123<br>(99.194%) | 0 (0%) | 124  |

|   |   |     |   |   |   |     |   |   |     |   |   |     |        |                |                  |               |      |
|---|---|-----|---|---|---|-----|---|---|-----|---|---|-----|--------|----------------|------------------|---------------|------|
| 1 | 1 | _B3 | 0 | 0 | 1 | _E5 | 0 | 1 | _G4 | . | 0 | _I6 | 0 (0%) | 433<br>(100%)  | 0 (0%)           | 0 (0%)        | 433  |
| 1 | 1 | _B3 | 0 | 0 | 1 | _E5 | 0 | 1 | _G4 | . | 1 | _I5 | 0 (0%) | 0 (0%)         | 424<br>(100%)    | 0 (0%)        | 424  |
| 1 | 1 | _B3 | 0 | 0 | 1 | _E5 | 0 | 1 | _G4 | . | 1 | _I6 | 0 (0%) | 0 (0%)         | 26 (100%)        | 0 (0%)        | 26   |
| 1 | 1 | _B3 | 0 | 0 | 1 | _E5 | 0 | 1 | _G4 | 0 | 0 | _I5 | 0 (0%) | 9<br>(1.357%)  | 654<br>(98.643%) | 0 (0%)        | 663  |
| 1 | 1 | _B3 | 0 | 0 | 1 | _E5 | 0 | 1 | _G4 | 0 | 0 | _I6 | 0 (0%) | 1455<br>(100%) | 0 (0%)           | 0 (0%)        | 1455 |
| 1 | 1 | _B3 | 0 | 0 | 1 | _E5 | 0 | 1 | _G4 | 0 | 1 | _I5 | 0 (0%) | 0 (0%)         | 1014<br>(100%)   | 0 (0%)        | 1014 |
| 1 | 1 | _B3 | 0 | 0 | 1 | _E5 | 0 | 1 | _G4 | 1 | 0 | _I5 | 0 (0%) | 4<br>(3.101%)  | 125<br>(96.899%) | 0 (0%)        | 129  |
| 1 | 1 | _B3 | 0 | 0 | 1 | _E5 | 0 | 1 | _G4 | 1 | 0 | _I6 | 0 (0%) | 114<br>(100%)  | 0 (0%)           | 0 (0%)        | 114  |
| 1 | 1 | _B3 | 0 | 0 | 1 | _E5 | 0 | 1 | _G4 | 1 | 1 | _I5 | 0 (0%) | 0 (0%)         | 232<br>(100%)    | 0 (0%)        | 232  |
| 1 | 1 | _B3 | 0 | 0 | 1 | _E5 | 0 | 1 | _G4 | 1 | 1 | _I6 | 0 (0%) | 0 (0%)         | 182<br>(100%)    | 0 (0%)        | 182  |
| 1 | 1 | _B3 | 0 | 0 | 1 | _E5 | 1 | 1 | _G3 | 0 | 0 | _I5 | 0 (0%) | 0 (0%)         | 51 (100%)        | 0 (0%)        | 51   |
| 1 | 1 | _B3 | 0 | 0 | 1 | _E5 | 1 | 1 | _G3 | 0 | 0 | _I6 | 0 (0%) | 335<br>(100%)  | 0 (0%)           | 0 (0%)        | 335  |
| 1 | 1 | _B3 | 0 | 0 | 1 | _E5 | 1 | 1 | _G3 | 0 | 1 | _I5 | 0 (0%) | 0 (0%)         | 264<br>(100%)    | 0 (0%)        | 264  |
| 1 | 1 | _B3 | 0 | 0 | 1 | _E5 | 1 | 1 | _G3 | 1 | 1 | _I5 | 0 (0%) | 0 (0%)         | 37<br>(90.244%)  | 4<br>(9.756%) | 41   |
| 1 | 1 | _B3 | 0 | 0 | 1 | _E5 | 1 | 1 | _G3 | 1 | 1 | _I6 | 0 (0%) | 0 (0%)         | 40<br>(97.561%)  | 1<br>(2.439%) | 41   |
| 1 | 1 | _B3 | 0 | 0 | 1 | _E5 | 1 | 1 | _G4 | 0 | 0 | _I5 | 0 (0%) | 0 (0%)         | 58 (100%)        | 0 (0%)        | 58   |
| 1 | 1 | _B3 | 0 | 0 | 1 | _E5 | 1 | 1 | _G4 | 0 | 0 | _I6 | 0 (0%) | 324<br>(100%)  | 0 (0%)           | 0 (0%)        | 324  |
| 1 | 1 | _B3 | 0 | 0 | 1 | _E5 | 1 | 1 | _G4 | 0 | 1 | _I5 | 0 (0%) | 0 (0%)         | 308<br>(100%)    | 0 (0%)        | 308  |
| 1 | 1 | _B3 | 0 | 0 | 1 | _E5 | 1 | 1 | _G4 | 1 | 1 | _I5 | 0 (0%) | 0 (0%)         | 47 (100%)        | 0 (0%)        | 47   |
| 1 | 1 | _B3 | 0 | 0 | 1 | _E5 | 1 | 1 | _G4 | 1 | 1 | _I6 | 0 (0%) | 0 (0%)         | 0 (0%)           | 40 (100%)     | 40   |
| 1 | 1 | _B3 | 0 | 1 | 0 | _E4 | 0 | 0 | _G4 | 0 | 0 | _I5 | 0 (0%) | 51 (100%)      | 0 (0%)           | 0 (0%)        | 51   |

Supplemental material is neither peer-reviewed nor thoroughly edited by CJASN. The authors alone are responsible for the accuracy and presentation of the material.

|   |   |     |   |   |   |     |   |   |     |   |   |     |               |                 |           |        |     |
|---|---|-----|---|---|---|-----|---|---|-----|---|---|-----|---------------|-----------------|-----------|--------|-----|
| 1 | 1 | _B3 | 0 | 1 | 0 | _E4 | 0 | 0 | _G4 | 0 | 0 | _I6 | 2<br>(3.279%) | 59<br>(96.721%) | 0 (0%)    | 0 (0%) | 61  |
| 1 | 1 | _B3 | 0 | 1 | 0 | _E4 | 0 | 1 | _G3 | . | 0 | _I5 | 0 (0%)        | 45 (100%)       | 0 (0%)    | 0 (0%) | 45  |
| 1 | 1 | _B3 | 0 | 1 | 0 | _E4 | 0 | 1 | _G3 | . | 0 | _I6 | 0 (0%)        | 34 (100%)       | 0 (0%)    | 0 (0%) | 34  |
| 1 | 1 | _B3 | 0 | 1 | 0 | _E4 | 0 | 1 | _G3 | 0 | 0 | _I5 | 0 (0%)        | 164<br>(100%)   | 0 (0%)    | 0 (0%) | 164 |
| 1 | 1 | _B3 | 0 | 1 | 0 | _E4 | 0 | 1 | _G3 | 0 | 0 | _I6 | 0 (0%)        | 160<br>(100%)   | 0 (0%)    | 0 (0%) | 160 |
| 1 | 1 | _B3 | 0 | 1 | 0 | _E4 | 0 | 1 | _G3 | 0 | 1 | _I5 | 0 (0%)        | 0 (0%)          | 43 (100%) | 0 (0%) | 43  |
| 1 | 1 | _B3 | 0 | 1 | 0 | _E4 | 0 | 1 | _G4 | . | 0 | _I5 | 0 (0%)        | 40 (100%)       | 0 (0%)    | 0 (0%) | 40  |
| 1 | 1 | _B3 | 0 | 1 | 0 | _E4 | 0 | 1 | _G4 | . | 0 | _I6 | 0 (0%)        | 46 (100%)       | 0 (0%)    | 0 (0%) | 46  |
| 1 | 1 | _B3 | 0 | 1 | 0 | _E4 | 0 | 1 | _G4 | 0 | 0 | _I5 | 0 (0%)        | 91 (100%)       | 0 (0%)    | 0 (0%) | 91  |
| 1 | 1 | _B3 | 0 | 1 | 0 | _E4 | 0 | 1 | _G4 | 0 | 0 | _I6 | 0 (0%)        | 155<br>(100%)   | 0 (0%)    | 0 (0%) | 155 |
| 1 | 1 | _B3 | 0 | 1 | 0 | _E4 | 0 | 1 | _G4 | 0 | 1 | _I5 | 0 (0%)        | 0 (0%)          | 38 (100%) | 0 (0%) | 38  |
| 1 | 1 | _B3 | 0 | 1 | 0 | _E4 | 1 | 1 | _G3 | 0 | 0 | _I6 | 0 (0%)        | 34 (100%)       | 0 (0%)    | 0 (0%) | 34  |
| 1 | 1 | _B3 | 0 | 1 | 0 | _E4 | 1 | 1 | _G3 | 0 | 1 | _I5 | 0 (0%)        | 0 (0%)          | 45 (100%) | 0 (0%) | 45  |
| 1 | 1 | _B3 | 0 | 1 | 0 | _E4 | 1 | 1 | _G4 | 0 | 0 | _I6 | 0 (0%)        | 46 (100%)       | 0 (0%)    | 0 (0%) | 46  |
| 1 | 1 | _B3 | 0 | 1 | 0 | _E4 | 1 | 1 | _G4 | 0 | 1 | _I5 | 0 (0%)        | 0 (0%)          | 40 (100%) | 0 (0%) | 40  |
| 1 | 1 | _B3 | 0 | 1 | 0 | _E5 | 0 | 0 | _G3 | 0 | 0 | _I6 | 0 (0%)        | 1 (100%)        | 0 (0%)    | 0 (0%) | 1   |
| 1 | 1 | _B3 | 0 | 1 | 0 | _E5 | 0 | 0 | _G4 | 0 | 0 | _I5 | 0 (0%)        | 67 (100%)       | 0 (0%)    | 0 (0%) | 67  |
| 1 | 1 | _B3 | 0 | 1 | 0 | _E5 | 0 | 0 | _G4 | 0 | 0 | _I6 | 3<br>(5.556%) | 51<br>(94.444%) | 0 (0%)    | 0 (0%) | 54  |
| 1 | 1 | _B3 | 0 | 1 | 0 | _E5 | 0 | 1 | _G3 | . | 0 | _I5 | 0 (0%)        | 41 (100%)       | 0 (0%)    | 0 (0%) | 41  |
| 1 | 1 | _B3 | 0 | 1 | 0 | _E5 | 0 | 1 | _G3 | . | 0 | _I6 | 0 (0%)        | 41 (100%)       | 0 (0%)    | 0 (0%) | 41  |
| 1 | 1 | _B3 | 0 | 1 | 0 | _E5 | 0 | 1 | _G3 | 0 | 0 | _I5 | 0 (0%)        | 149<br>(100%)   | 0 (0%)    | 0 (0%) | 149 |

*Supplemental material is neither peer-reviewed nor thoroughly edited by CJASN. The authors alone are responsible for the accuracy and presentation of the material.*

|   |   |     |   |   |   |     |   |   |     |   |   |     |        |                  |               |        |     |
|---|---|-----|---|---|---|-----|---|---|-----|---|---|-----|--------|------------------|---------------|--------|-----|
| 1 | 1 | _B3 | 0 | 1 | 0 | _E5 | 0 | 1 | _G3 | 0 | 0 | _I6 | 0 (0%) | 183<br>(100%)    | 0 (0%)        | 0 (0%) | 183 |
| 1 | 1 | _B3 | 0 | 1 | 0 | _E5 | 0 | 1 | _G3 | 0 | 1 | _I5 | 0 (0%) | 0 (0%)           | 41 (100%)     | 0 (0%) | 41  |
| 1 | 1 | _B3 | 0 | 1 | 0 | _E5 | 0 | 1 | _G4 | . | 0 | _I5 | 0 (0%) | 47 (100%)        | 0 (0%)        | 0 (0%) | 47  |
| 1 | 1 | _B3 | 0 | 1 | 0 | _E5 | 0 | 1 | _G4 | . | 0 | _I6 | 0 (0%) | 40 (100%)        | 0 (0%)        | 0 (0%) | 40  |
| 1 | 1 | _B3 | 0 | 1 | 0 | _E5 | 0 | 1 | _G4 | 0 | 0 | _I5 | 0 (0%) | 108<br>(98.182%) | 2<br>(1.818%) | 0 (0%) | 110 |
| 1 | 1 | _B3 | 0 | 1 | 0 | _E5 | 0 | 1 | _G4 | 0 | 0 | _I6 | 0 (0%) | 132<br>(100%)    | 0 (0%)        | 0 (0%) | 132 |
| 1 | 1 | _B3 | 0 | 1 | 0 | _E5 | 0 | 1 | _G4 | 0 | 1 | _I5 | 0 (0%) | 0 (0%)           | 51 (100%)     | 0 (0%) | 51  |
| 1 | 1 | _B3 | 0 | 1 | 0 | _E5 | 1 | 1 | _G3 | 0 | 0 | _I6 | 0 (0%) | 41 (100%)        | 0 (0%)        | 0 (0%) | 41  |
| 1 | 1 | _B3 | 0 | 1 | 0 | _E5 | 1 | 1 | _G3 | 0 | 1 | _I5 | 0 (0%) | 0 (0%)           | 41 (100%)     | 0 (0%) | 41  |
| 1 | 1 | _B3 | 0 | 1 | 0 | _E5 | 1 | 1 | _G4 | 0 | 0 | _I6 | 0 (0%) | 40 (100%)        | 0 (0%)        | 0 (0%) | 40  |
| 1 | 1 | _B3 | 0 | 1 | 0 | _E5 | 1 | 1 | _G4 | 0 | 1 | _I5 | 0 (0%) | 0 (0%)           | 47 (100%)     | 0 (0%) | 47  |
| 1 | 1 | _B3 | 0 | 1 | 1 | _E3 | 0 | 0 | _G4 | 0 | 0 | _I5 | 0 (0%) | 88 (100%)        | 0 (0%)        | 0 (0%) | 88  |
| 1 | 1 | _B3 | 0 | 1 | 1 | _E3 | 0 | 0 | _G4 | 0 | 0 | _I6 | 0 (0%) | 84 (100%)        | 0 (0%)        | 0 (0%) | 84  |
| 1 | 1 | _B3 | 0 | 1 | 1 | _E3 | 0 | 1 | _G3 | . | 0 | _I5 | 0 (0%) | 0 (0%)           | 41 (100%)     | 0 (0%) | 41  |
| 1 | 1 | _B3 | 0 | 1 | 1 | _E3 | 0 | 1 | _G3 | . | 0 | _I6 | 0 (0%) | 117<br>(100%)    | 0 (0%)        | 0 (0%) | 117 |
| 1 | 1 | _B3 | 0 | 1 | 1 | _E3 | 0 | 1 | _G3 | . | 1 | _I5 | 0 (0%) | 0 (0%)           | 82 (100%)     | 0 (0%) | 82  |
| 1 | 1 | _B3 | 0 | 1 | 1 | _E3 | 0 | 1 | _G3 | 0 | 0 | _I5 | 0 (0%) | 0 (0%)           | 205<br>(100%) | 0 (0%) | 205 |
| 1 | 1 | _B3 | 0 | 1 | 1 | _E3 | 0 | 1 | _G3 | 0 | 0 | _I6 | 0 (0%) | 468<br>(100%)    | 0 (0%)        | 0 (0%) | 468 |
| 1 | 1 | _B3 | 0 | 1 | 1 | _E3 | 0 | 1 | _G3 | 0 | 1 | _I5 | 0 (0%) | 0 (0%)           | 287<br>(100%) | 0 (0%) | 287 |
| 1 | 1 | _B3 | 0 | 1 | 1 | _E3 | 0 | 1 | _G3 | 1 | 0 | _I6 | 0 (0%) | 39 (100%)        | 0 (0%)        | 0 (0%) | 39  |
| 1 | 1 | _B3 | 0 | 1 | 1 | _E3 | 0 | 1 | _G3 | 1 | 1 | _I5 | 0 (0%) | 0 (0%)           | 41 (100%)     | 0 (0%) | 41  |

*Supplemental material is neither peer-reviewed nor thoroughly edited by CJASN. The authors alone are responsible for the accuracy and presentation of the material.*

|   |   |     |   |   |   |     |   |   |     |   |   |     |        |            |            |           |     |
|---|---|-----|---|---|---|-----|---|---|-----|---|---|-----|--------|------------|------------|-----------|-----|
| 1 | 1 | _B3 | 0 | 1 | 1 | _E3 | 0 | 1 | _G4 | . | 0 | _I5 | 0 (0%) | 0 (0%)     | 44 (100%)  | 0 (0%)    | 44  |
| 1 | 1 | _B3 | 0 | 1 | 1 | _E3 | 0 | 1 | _G4 | . | 0 | _I6 | 0 (0%) | 126 (100%) | 0 (0%)     | 0 (0%)    | 126 |
| 1 | 1 | _B3 | 0 | 1 | 1 | _E3 | 0 | 1 | _G4 | . | 1 | _I5 | 0 (0%) | 0 (0%)     | 88 (100%)  | 0 (0%)    | 88  |
| 1 | 1 | _B3 | 0 | 1 | 1 | _E3 | 0 | 1 | _G4 | 0 | 0 | _I5 | 0 (0%) | 0 (0%)     | 132 (100%) | 0 (0%)    | 132 |
| 1 | 1 | _B3 | 0 | 1 | 1 | _E3 | 0 | 1 | _G4 | 0 | 0 | _I6 | 0 (0%) | 420 (100%) | 0 (0%)     | 0 (0%)    | 420 |
| 1 | 1 | _B3 | 0 | 1 | 1 | _E3 | 0 | 1 | _G4 | 0 | 1 | _I5 | 0 (0%) | 0 (0%)     | 308 (100%) | 0 (0%)    | 308 |
| 1 | 1 | _B3 | 0 | 1 | 1 | _E3 | 0 | 1 | _G4 | 1 | 0 | _I6 | 0 (0%) | 42 (100%)  | 0 (0%)     | 0 (0%)    | 42  |
| 1 | 1 | _B3 | 0 | 1 | 1 | _E3 | 0 | 1 | _G4 | 1 | 1 | _I5 | 0 (0%) | 0 (0%)     | 44 (100%)  | 0 (0%)    | 44  |
| 1 | 1 | _B3 | 0 | 1 | 1 | _E3 | 1 | 0 | _G4 | 0 | 0 | _I5 | 0 (0%) | 44 (100%)  | 0 (0%)     | 0 (0%)    | 44  |
| 1 | 1 | _B3 | 0 | 1 | 1 | _E3 | 1 | 0 | _G4 | 0 | 0 | _I6 | 0 (0%) | 42 (100%)  | 0 (0%)     | 0 (0%)    | 42  |
| 1 | 1 | _B3 | 0 | 1 | 1 | _E3 | 1 | 1 | _G3 | 0 | 0 | _I5 | 0 (0%) | 0 (0%)     | 41 (100%)  | 0 (0%)    | 41  |
| 1 | 1 | _B3 | 0 | 1 | 1 | _E3 | 1 | 1 | _G3 | 0 | 0 | _I6 | 0 (0%) | 117 (100%) | 0 (0%)     | 0 (0%)    | 117 |
| 1 | 1 | _B3 | 0 | 1 | 1 | _E3 | 1 | 1 | _G3 | 0 | 1 | _I5 | 0 (0%) | 0 (0%)     | 82 (100%)  | 0 (0%)    | 82  |
| 1 | 1 | _B3 | 0 | 1 | 1 | _E3 | 1 | 1 | _G3 | 1 | 1 | _I5 | 0 (0%) | 0 (0%)     | 0 (0%)     | 41 (100%) | 41  |
| 1 | 1 | _B3 | 0 | 1 | 1 | _E3 | 1 | 1 | _G3 | 1 | 1 | _I6 | 0 (0%) | 0 (0%)     | 0 (0%)     | 39 (100%) | 39  |
| 1 | 1 | _B3 | 0 | 1 | 1 | _E3 | 1 | 1 | _G4 | 0 | 0 | _I6 | 0 (0%) | 84 (100%)  | 0 (0%)     | 0 (0%)    | 84  |
| 1 | 1 | _B3 | 0 | 1 | 1 | _E3 | 1 | 1 | _G4 | 0 | 1 | _I5 | 0 (0%) | 0 (0%)     | 88 (100%)  | 0 (0%)    | 88  |
| 1 | 1 | _B3 | 0 | 1 | 1 | _E3 | 1 | 1 | _G4 | 1 | 1 | _I5 | 0 (0%) | 0 (0%)     | 0 (0%)     | 44 (100%) | 44  |
| 1 | 1 | _B3 | 0 | 1 | 1 | _E3 | 1 | 1 | _G4 | 1 | 1 | _I6 | 0 (0%) | 0 (0%)     | 0 (0%)     | 42 (100%) | 42  |
| 1 | 1 | _B3 | 0 | 1 | 1 | _E4 | 0 | 0 | _G4 | 0 | 0 | _I5 | 0 (0%) | 29 (100%)  | 0 (0%)     | 0 (0%)    | 29  |
| 1 | 1 | _B3 | 0 | 1 | 1 | _E4 | 0 | 0 | _G4 | 0 | 0 | _I6 | 0 (0%) | 31 (100%)  | 0 (0%)     | 0 (0%)    | 31  |

*Supplemental material is neither peer-reviewed nor thoroughly edited by CJASN. The authors alone are responsible for the accuracy and presentation of the material.*

|   |   |     |   |   |   |     |   |   |     |   |   |     |        |            |             |              |     |
|---|---|-----|---|---|---|-----|---|---|-----|---|---|-----|--------|------------|-------------|--------------|-----|
| 1 | 1 | _B3 | 0 | 1 | 1 | _E4 | 0 | 1 | _G3 | . | 0 | _I6 | 0 (0%) | 68 (100%)  | 0 (0%)      | 0 (0%)       | 68  |
| 1 | 1 | _B3 | 0 | 1 | 1 | _E4 | 0 | 1 | _G3 | . | 1 | _I5 | 0 (0%) | 0 (0%)     | 90 (100%)   | 0 (0%)       | 90  |
| 1 | 1 | _B3 | 0 | 1 | 1 | _E4 | 0 | 1 | _G3 | 0 | 0 | _I5 | 0 (0%) | 0 (0%)     | 61 (100%)   | 0 (0%)       | 61  |
| 1 | 1 | _B3 | 0 | 1 | 1 | _E4 | 0 | 1 | _G3 | 0 | 0 | _I6 | 0 (0%) | 248 (100%) | 0 (0%)      | 0 (0%)       | 248 |
| 1 | 1 | _B3 | 0 | 1 | 1 | _E4 | 0 | 1 | _G3 | 0 | 1 | _I5 | 0 (0%) | 0 (0%)     | 272 (100%)  | 0 (0%)       | 272 |
| 1 | 1 | _B3 | 0 | 1 | 1 | _E4 | 0 | 1 | _G3 | 1 | 0 | _I6 | 0 (0%) | 34 (100%)  | 0 (0%)      | 0 (0%)       | 34  |
| 1 | 1 | _B3 | 0 | 1 | 1 | _E4 | 0 | 1 | _G3 | 1 | 1 | _I5 | 0 (0%) | 0 (0%)     | 45 (100%)   | 0 (0%)       | 45  |
| 1 | 1 | _B3 | 0 | 1 | 1 | _E4 | 0 | 1 | _G4 | . | 0 | _I6 | 0 (0%) | 92 (100%)  | 0 (0%)      | 0 (0%)       | 92  |
| 1 | 1 | _B3 | 0 | 1 | 1 | _E4 | 0 | 1 | _G4 | . | 1 | _I5 | 0 (0%) | 0 (0%)     | 80 (100%)   | 0 (0%)       | 80  |
| 1 | 1 | _B3 | 0 | 1 | 1 | _E4 | 0 | 1 | _G4 | 0 | 0 | _I5 | 0 (0%) | 0 (0%)     | 29 (100%)   | 0 (0%)       | 29  |
| 1 | 1 | _B3 | 0 | 1 | 1 | _E4 | 0 | 1 | _G4 | 0 | 0 | _I6 | 0 (0%) | 305 (100%) | 0 (0%)      | 0 (0%)       | 305 |
| 1 | 1 | _B3 | 0 | 1 | 1 | _E4 | 0 | 1 | _G4 | 0 | 1 | _I5 | 0 (0%) | 0 (0%)     | 242 (100%)  | 0 (0%)       | 242 |
| 1 | 1 | _B3 | 0 | 1 | 1 | _E4 | 0 | 1 | _G4 | 1 | 0 | _I6 | 0 (0%) | 46 (100%)  | 0 (0%)      | 0 (0%)       | 46  |
| 1 | 1 | _B3 | 0 | 1 | 1 | _E4 | 0 | 1 | _G4 | 1 | 1 | _I5 | 0 (0%) | 0 (0%)     | 40 (100%)   | 0 (0%)       | 40  |
| 1 | 1 | _B3 | 0 | 1 | 1 | _E4 | 1 | 0 | _G4 | 0 | 0 | _I5 | 0 (0%) | 39 (97.5%) | 1 (2.5%)    | 0 (0%)       | 40  |
| 1 | 1 | _B3 | 0 | 1 | 1 | _E4 | 1 | 0 | _G4 | 0 | 0 | _I6 | 0 (0%) | 46 (100%)  | 0 (0%)      | 0 (0%)       | 46  |
| 1 | 1 | _B3 | 0 | 1 | 1 | _E4 | 1 | 1 | _G3 | 0 | 0 | _I5 | 0 (0%) | 0 (0%)     | 45 (100%)   | 0 (0%)       | 45  |
| 1 | 1 | _B3 | 0 | 1 | 1 | _E4 | 1 | 1 | _G3 | 0 | 0 | _I6 | 0 (0%) | 68 (100%)  | 0 (0%)      | 0 (0%)       | 68  |
| 1 | 1 | _B3 | 0 | 1 | 1 | _E4 | 1 | 1 | _G3 | 0 | 1 | _I5 | 0 (0%) | 0 (0%)     | 45 (100%)   | 0 (0%)       | 45  |
| 1 | 1 | _B3 | 0 | 1 | 1 | _E4 | 1 | 1 | _G3 | 1 | 1 | _I5 | 0 (0%) | 0 (0%)     | 6 (13.333%) | 39 (86.667%) | 45  |
| 1 | 1 | _B3 | 0 | 1 | 1 | _E4 | 1 | 1 | _G3 | 1 | 1 | _I6 | 0 (0%) | 0 (0%)     | 0 (0%)      | 34 (100%)    | 34  |

*Supplemental material is neither peer-reviewed nor thoroughly edited by CJASN. The authors alone are responsible for the accuracy and presentation of the material.*

|   |   |     |   |   |   |     |   |   |     |   |   |     |        |                 |               |           |     |
|---|---|-----|---|---|---|-----|---|---|-----|---|---|-----|--------|-----------------|---------------|-----------|-----|
| 1 | 1 | _B3 | 0 | 1 | 1 | _E4 | 1 | 1 | _G4 | 0 | 0 | _I6 | 0 (0%) | 46 (100%)       | 0 (0%)        | 0 (0%)    | 46  |
| 1 | 1 | _B3 | 0 | 1 | 1 | _E4 | 1 | 1 | _G4 | 0 | 1 | _I5 | 0 (0%) | 0 (0%)          | 40 (100%)     | 0 (0%)    | 40  |
| 1 | 1 | _B3 | 0 | 1 | 1 | _E4 | 1 | 1 | _G4 | 1 | 1 | _I5 | 0 (0%) | 0 (0%)          | 6 (15%)       | 34 (85%)  | 40  |
| 1 | 1 | _B3 | 0 | 1 | 1 | _E4 | 1 | 1 | _G4 | 1 | 1 | _I6 | 0 (0%) | 0 (0%)          | 0 (0%)        | 46 (100%) | 46  |
| 1 | 1 | _B3 | 0 | 1 | 1 | _E5 | 0 | 0 | _G3 | 0 | 0 | _I6 | 0 (0%) | 1 (100%)        | 0 (0%)        | 0 (0%)    | 1   |
| 1 | 1 | _B3 | 0 | 1 | 1 | _E5 | 0 | 0 | _G4 | 0 | 0 | _I5 | 0 (0%) | 26<br>(96.296%) | 1<br>(3.704%) | 0 (0%)    | 27  |
| 1 | 1 | _B3 | 0 | 1 | 1 | _E5 | 0 | 0 | _G4 | 0 | 0 | _I6 | 0 (0%) | 26 (100%)       | 0 (0%)        | 0 (0%)    | 26  |
| 1 | 1 | _B3 | 0 | 1 | 1 | _E5 | 0 | 1 | _G3 | . | 0 | _I6 | 0 (0%) | 82 (100%)       | 0 (0%)        | 0 (0%)    | 82  |
| 1 | 1 | _B3 | 0 | 1 | 1 | _E5 | 0 | 1 | _G3 | . | 1 | _I5 | 0 (0%) | 0 (0%)          | 82 (100%)     | 0 (0%)    | 82  |
| 1 | 1 | _B3 | 0 | 1 | 1 | _E5 | 0 | 1 | _G3 | 0 | 0 | _I5 | 0 (0%) | 0 (0%)          | 56 (100%)     | 0 (0%)    | 56  |
| 1 | 1 | _B3 | 0 | 1 | 1 | _E5 | 0 | 1 | _G3 | 0 | 0 | _I6 | 0 (0%) | 307<br>(100%)   | 0 (0%)        | 0 (0%)    | 307 |
| 1 | 1 | _B3 | 0 | 1 | 1 | _E5 | 0 | 1 | _G3 | 0 | 1 | _I5 | 0 (0%) | 0 (0%)          | 246<br>(100%) | 0 (0%)    | 246 |
| 1 | 1 | _B3 | 0 | 1 | 1 | _E5 | 0 | 1 | _G3 | 1 | 0 | _I6 | 0 (0%) | 41 (100%)       | 0 (0%)        | 0 (0%)    | 41  |
| 1 | 1 | _B3 | 0 | 1 | 1 | _E5 | 0 | 1 | _G3 | 1 | 1 | _I5 | 0 (0%) | 0 (0%)          | 41 (100%)     | 0 (0%)    | 41  |
| 1 | 1 | _B3 | 0 | 1 | 1 | _E5 | 0 | 1 | _G4 | . | 0 | _I6 | 0 (0%) | 80 (100%)       | 0 (0%)        | 0 (0%)    | 80  |
| 1 | 1 | _B3 | 0 | 1 | 1 | _E5 | 0 | 1 | _G4 | . | 1 | _I5 | 0 (0%) | 0 (0%)          | 94 (100%)     | 0 (0%)    | 94  |
| 1 | 1 | _B3 | 0 | 1 | 1 | _E5 | 0 | 1 | _G4 | 0 | 0 | _I5 | 0 (0%) | 0 (0%)          | 31 (100%)     | 0 (0%)    | 31  |
| 1 | 1 | _B3 | 0 | 1 | 1 | _E5 | 0 | 1 | _G4 | 0 | 0 | _I6 | 0 (0%) | 268<br>(100%)   | 0 (0%)        | 0 (0%)    | 268 |
| 1 | 1 | _B3 | 0 | 1 | 1 | _E5 | 0 | 1 | _G4 | 0 | 1 | _I5 | 0 (0%) | 0 (0%)          | 278<br>(100%) | 0 (0%)    | 278 |
| 1 | 1 | _B3 | 0 | 1 | 1 | _E5 | 0 | 1 | _G4 | 1 | 0 | _I6 | 0 (0%) | 40 (100%)       | 0 (0%)        | 0 (0%)    | 40  |
| 1 | 1 | _B3 | 0 | 1 | 1 | _E5 | 0 | 1 | _G4 | 1 | 1 | _I5 | 0 (0%) | 0 (0%)          | 47 (100%)     | 0 (0%)    | 47  |

|   |   |     |   |   |   |     |   |   |     |   |   |     |        |                 |                |                 |    |
|---|---|-----|---|---|---|-----|---|---|-----|---|---|-----|--------|-----------------|----------------|-----------------|----|
| 1 | 1 | _B3 | 0 | 1 | 1 | _E5 | 1 | 0 | _G3 | 0 | 0 | _I6 | 0 (0%) | 1 (100%)        | 0 (0%)         | 0 (0%)          | 1  |
| 1 | 1 | _B3 | 0 | 1 | 1 | _E5 | 1 | 0 | _G4 | 0 | 0 | _I5 | 0 (0%) | 38<br>(80.851%) | 9<br>(19.149%) | 0 (0%)          | 47 |
| 1 | 1 | _B3 | 0 | 1 | 1 | _E5 | 1 | 0 | _G4 | 0 | 0 | _I6 | 0 (0%) | 40 (100%)       | 0 (0%)         | 0 (0%)          | 40 |
| 1 | 1 | _B3 | 0 | 1 | 1 | _E5 | 1 | 1 | _G3 | 0 | 0 | _I5 | 0 (0%) | 0 (0%)          | 41 (100%)      | 0 (0%)          | 41 |
| 1 | 1 | _B3 | 0 | 1 | 1 | _E5 | 1 | 1 | _G3 | 0 | 0 | _I6 | 0 (0%) | 81 (100%)       | 0 (0%)         | 0 (0%)          | 81 |
| 1 | 1 | _B3 | 0 | 1 | 1 | _E5 | 1 | 1 | _G3 | 0 | 1 | _I5 | 0 (0%) | 0 (0%)          | 41 (100%)      | 0 (0%)          | 41 |
| 1 | 1 | _B3 | 0 | 1 | 1 | _E5 | 1 | 1 | _G3 | 1 | 1 | _I5 | 0 (0%) | 0 (0%)          | 2<br>(4.878%)  | 39<br>(95.122%) | 41 |
| 1 | 1 | _B3 | 0 | 1 | 1 | _E5 | 1 | 1 | _G3 | 1 | 1 | _I6 | 0 (0%) | 0 (0%)          | 0 (0%)         | 41 (100%)       | 41 |
| 1 | 1 | _B3 | 0 | 1 | 1 | _E5 | 1 | 1 | _G4 | 0 | 0 | _I6 | 0 (0%) | 40 (100%)       | 0 (0%)         | 0 (0%)          | 40 |
| 1 | 1 | _B3 | 0 | 1 | 1 | _E5 | 1 | 1 | _G4 | 0 | 1 | _I5 | 0 (0%) | 0 (0%)          | 47 (100%)      | 0 (0%)          | 47 |
| 1 | 1 | _B3 | 0 | 1 | 1 | _E5 | 1 | 1 | _G4 | 1 | 1 | _I5 | 0 (0%) | 0 (0%)          | 1<br>(2.128%)  | 46<br>(97.872%) | 47 |
| 1 | 1 | _B3 | 0 | 1 | 1 | _E5 | 1 | 1 | _G4 | 1 | 1 | _I6 | 0 (0%) | 0 (0%)          | 0 (0%)         | 40 (100%)       | 40 |
| 1 | 1 | _B3 | 1 | . | . | _E3 | 1 | . | _G3 | 1 | 1 | _I5 | 0 (0%) | 0 (0%)          | 0 (0%)         | 41 (100%)       | 41 |
| 1 | 1 | _B3 | 1 | . | . | _E3 | 1 | . | _G3 | 1 | 1 | _I6 | 0 (0%) | 0 (0%)          | 0 (0%)         | 39 (100%)       | 39 |
| 1 | 1 | _B3 | 1 | . | . | _E3 | 1 | . | _G4 | 1 | 1 | _I5 | 0 (0%) | 0 (0%)          | 0 (0%)         | 44 (100%)       | 44 |
| 1 | 1 | _B3 | 1 | . | . | _E3 | 1 | . | _G4 | 1 | 1 | _I6 | 0 (0%) | 0 (0%)          | 0 (0%)         | 42 (100%)       | 42 |
| 1 | 1 | _B3 | 1 | . | . | _E4 | 1 | . | _G3 | 1 | 1 | _I5 | 0 (0%) | 0 (0%)          | 0 (0%)         | 45 (100%)       | 45 |
| 1 | 1 | _B3 | 1 | . | . | _E4 | 1 | . | _G3 | 1 | 1 | _I6 | 0 (0%) | 0 (0%)          | 0 (0%)         | 34 (100%)       | 34 |
| 1 | 1 | _B3 | 1 | . | . | _E4 | 1 | . | _G4 | 1 | 1 | _I5 | 0 (0%) | 0 (0%)          | 0 (0%)         | 40 (100%)       | 40 |
| 1 | 1 | _B3 | 1 | . | . | _E4 | 1 | . | _G4 | 1 | 1 | _I6 | 0 (0%) | 0 (0%)          | 0 (0%)         | 46 (100%)       | 46 |
| 1 | 1 | _B3 | 1 | . | . | _E5 | 1 | . | _G3 | 1 | 1 | _I5 | 0 (0%) | 0 (0%)          | 0 (0%)         | 41 (100%)       | 41 |

Supplemental material is neither peer-reviewed nor thoroughly edited by CJASN. The authors alone are responsible for the accuracy and presentation of the material.

|   |   |     |   |   |   |     |   |   |     |   |   |     |        |        |                 |                 |     |
|---|---|-----|---|---|---|-----|---|---|-----|---|---|-----|--------|--------|-----------------|-----------------|-----|
| 1 | 1 | _B3 | 1 | . | . | _E5 | 1 | . | _G3 | 1 | 1 | _I6 | 0 (0%) | 0 (0%) | 0 (0%)          | 41 (100%)       | 41  |
| 1 | 1 | _B3 | 1 | . | . | _E5 | 1 | . | _G4 | 1 | 1 | _I5 | 0 (0%) | 0 (0%) | 0 (0%)          | 47 (100%)       | 47  |
| 1 | 1 | _B3 | 1 | . | . | _E5 | 1 | . | _G4 | 1 | 1 | _I6 | 0 (0%) | 0 (0%) | 0 (0%)          | 40 (100%)       | 40  |
| 1 | 1 | _B3 | 1 | . | 0 | _E4 | 1 | 1 | _G3 | 1 | 0 | _I5 | 0 (0%) | 0 (0%) | 0 (0%)          | 45 (100%)       | 45  |
| 1 | 1 | _B3 | 1 | . | 0 | _E4 | 1 | 1 | _G3 | 1 | 1 | _I5 | 0 (0%) | 0 (0%) | 0 (0%)          | 45 (100%)       | 45  |
| 1 | 1 | _B3 | 1 | . | 0 | _E4 | 1 | 1 | _G3 | 1 | 1 | _I6 | 0 (0%) | 0 (0%) | 62<br>(89.855%) | 7<br>(10.145%)  | 69  |
| 1 | 1 | _B3 | 1 | . | 0 | _E4 | 1 | 1 | _G4 | 1 | 0 | _I5 | 0 (0%) | 0 (0%) | 0 (0%)          | 40 (100%)       | 40  |
| 1 | 1 | _B3 | 1 | . | 0 | _E4 | 1 | 1 | _G4 | 1 | 1 | _I5 | 0 (0%) | 0 (0%) | 0 (0%)          | 52 (100%)       | 52  |
| 1 | 1 | _B3 | 1 | . | 0 | _E4 | 1 | 1 | _G4 | 1 | 1 | _I6 | 0 (0%) | 0 (0%) | 14<br>(16.471%) | 71<br>(83.529%) | 85  |
| 1 | 1 | _B3 | 1 | . | 0 | _E5 | 1 | 1 | _G3 | 1 | 0 | _I5 | 0 (0%) | 0 (0%) | 0 (0%)          | 41 (100%)       | 41  |
| 1 | 1 | _B3 | 1 | . | 0 | _E5 | 1 | 1 | _G3 | 1 | 1 | _I5 | 0 (0%) | 0 (0%) | 0 (0%)          | 37 (100%)       | 37  |
| 1 | 1 | _B3 | 1 | . | 0 | _E5 | 1 | 1 | _G3 | 1 | 1 | _I6 | 0 (0%) | 0 (0%) | 73<br>(87.952%) | 10<br>(12.048%) | 83  |
| 1 | 1 | _B3 | 1 | . | 0 | _E5 | 1 | 1 | _G4 | 1 | 0 | _I5 | 0 (0%) | 0 (0%) | 0 (0%)          | 47 (100%)       | 47  |
| 1 | 1 | _B3 | 1 | . | 0 | _E5 | 1 | 1 | _G4 | 1 | 1 | _I5 | 0 (0%) | 0 (0%) | 0 (0%)          | 56 (100%)       | 56  |
| 1 | 1 | _B3 | 1 | . | 0 | _E5 | 1 | 1 | _G4 | 1 | 1 | _I6 | 0 (0%) | 0 (0%) | 13<br>(16.883%) | 64<br>(83.117%) | 77  |
| 1 | 1 | _B3 | 1 | . | 1 | _E3 | 0 | 1 | _G3 | 1 | 1 | _I5 | 0 (0%) | 0 (0%) | 0 (0%)          | 41 (100%)       | 41  |
| 1 | 1 | _B3 | 1 | . | 1 | _E3 | 0 | 1 | _G3 | 1 | 1 | _I6 | 0 (0%) | 0 (0%) | 39 (100%)       | 0 (0%)          | 39  |
| 1 | 1 | _B3 | 1 | . | 1 | _E3 | 0 | 1 | _G4 | 1 | 1 | _I5 | 0 (0%) | 0 (0%) | 0 (0%)          | 44 (100%)       | 44  |
| 1 | 1 | _B3 | 1 | . | 1 | _E3 | 0 | 1 | _G4 | 1 | 1 | _I6 | 0 (0%) | 0 (0%) | 42 (100%)       | 0 (0%)          | 42  |
| 1 | 1 | _B3 | 1 | . | 1 | _E3 | 1 | 1 | _G3 | . | 1 | _I5 | 0 (0%) | 0 (0%) | 0 (0%)          | 123<br>(100%)   | 123 |
| 1 | 1 | _B3 | 1 | . | 1 | _E3 | 1 | 1 | _G3 | . | 1 | _I6 | 0 (0%) | 0 (0%) | 0 (0%)          | 117<br>(100%)   | 117 |

Supplemental material is neither peer-reviewed nor thoroughly edited by CJASN. The authors alone are responsible for the accuracy and presentation of the material.

|   |   |     |   |   |   |     |   |   |     |   |   |     |        |        |              |               |     |
|---|---|-----|---|---|---|-----|---|---|-----|---|---|-----|--------|--------|--------------|---------------|-----|
| 1 | 1 | _B3 | 1 | . | 1 | _E3 | 1 | 1 | _G3 | 1 | 0 | _I5 | 0 (0%) | 0 (0%) | 0 (0%)       | 41 (100%)     | 41  |
| 1 | 1 | _B3 | 1 | . | 1 | _E3 | 1 | 1 | _G3 | 1 | 1 | _I5 | 0 (0%) | 0 (0%) | 0 (0%)       | 246 (100%)    | 246 |
| 1 | 1 | _B3 | 1 | . | 1 | _E3 | 1 | 1 | _G3 | 1 | 1 | _I6 | 0 (0%) | 0 (0%) | 39 (14.286%) | 234 (85.714%) | 273 |
| 1 | 1 | _B3 | 1 | . | 1 | _E3 | 1 | 1 | _G4 | . | 1 | _I5 | 0 (0%) | 0 (0%) | 0 (0%)       | 132 (100%)    | 132 |
| 1 | 1 | _B3 | 1 | . | 1 | _E3 | 1 | 1 | _G4 | . | 1 | _I6 | 0 (0%) | 0 (0%) | 0 (0%)       | 126 (100%)    | 126 |
| 1 | 1 | _B3 | 1 | . | 1 | _E3 | 1 | 1 | _G4 | 1 | 0 | _I5 | 0 (0%) | 0 (0%) | 0 (0%)       | 44 (100%)     | 44  |
| 1 | 1 | _B3 | 1 | . | 1 | _E3 | 1 | 1 | _G4 | 1 | 1 | _I5 | 0 (0%) | 0 (0%) | 0 (0%)       | 264 (100%)    | 264 |
| 1 | 1 | _B3 | 1 | . | 1 | _E3 | 1 | 1 | _G4 | 1 | 1 | _I6 | 0 (0%) | 0 (0%) | 0 (0%)       | 294 (100%)    | 294 |
| 1 | 1 | _B3 | 1 | . | 1 | _E4 | 0 | 1 | _G3 | 1 | 1 | _I5 | 0 (0%) | 0 (0%) | 0 (0%)       | 45 (100%)     | 45  |
| 1 | 1 | _B3 | 1 | . | 1 | _E4 | 0 | 1 | _G3 | 1 | 1 | _I6 | 0 (0%) | 0 (0%) | 34 (100%)    | 0 (0%)        | 34  |
| 1 | 1 | _B3 | 1 | . | 1 | _E4 | 0 | 1 | _G4 | 1 | 1 | _I5 | 0 (0%) | 0 (0%) | 0 (0%)       | 40 (100%)     | 40  |
| 1 | 1 | _B3 | 1 | . | 1 | _E4 | 0 | 1 | _G4 | 1 | 1 | _I6 | 0 (0%) | 0 (0%) | 46 (100%)    | 0 (0%)        | 46  |
| 1 | 1 | _B3 | 1 | . | 1 | _E4 | 1 | 1 | _G3 | . | 1 | _I5 | 0 (0%) | 0 (0%) | 0 (0%)       | 135 (100%)    | 135 |
| 1 | 1 | _B3 | 1 | . | 1 | _E4 | 1 | 1 | _G3 | . | 1 | _I6 | 0 (0%) | 0 (0%) | 0 (0%)       | 102 (100%)    | 102 |
| 1 | 1 | _B3 | 1 | . | 1 | _E4 | 1 | 1 | _G3 | 1 | 1 | _I5 | 0 (0%) | 0 (0%) | 0 (0%)       | 225 (100%)    | 225 |
| 1 | 1 | _B3 | 1 | . | 1 | _E4 | 1 | 1 | _G3 | 1 | 1 | _I6 | 0 (0%) | 0 (0%) | 0 (0%)       | 169 (100%)    | 169 |
| 1 | 1 | _B3 | 1 | . | 1 | _E4 | 1 | 1 | _G4 | . | 1 | _I5 | 0 (0%) | 0 (0%) | 0 (0%)       | 120 (100%)    | 120 |
| 1 | 1 | _B3 | 1 | . | 1 | _E4 | 1 | 1 | _G4 | . | 1 | _I6 | 0 (0%) | 0 (0%) | 0 (0%)       | 138 (100%)    | 138 |
| 1 | 1 | _B3 | 1 | . | 1 | _E4 | 1 | 1 | _G4 | 1 | 1 | _I5 | 0 (0%) | 0 (0%) | 0 (0%)       | 188 (100%)    | 188 |
| 1 | 1 | _B3 | 1 | . | 1 | _E4 | 1 | 1 | _G4 | 1 | 1 | _I6 | 0 (0%) | 0 (0%) | 0 (0%)       | 237 (100%)    | 237 |
| 1 | 1 | _B3 | 1 | . | 1 | _E5 | 0 | 1 | _G3 | 1 | 1 | _I5 | 0 (0%) | 0 (0%) | 0 (0%)       | 41 (100%)     | 41  |

|   |   |     |   |   |   |     |   |   |     |   |   |     |           |           |           |            |     |
|---|---|-----|---|---|---|-----|---|---|-----|---|---|-----|-----------|-----------|-----------|------------|-----|
| 1 | 1 | _B3 | 1 | . | 1 | _E5 | 0 | 1 | _G3 | 1 | 1 | _I6 | 0 (0%)    | 0 (0%)    | 41 (100%) | 0 (0%)     | 41  |
| 1 | 1 | _B3 | 1 | . | 1 | _E5 | 0 | 1 | _G4 | 1 | 1 | _I5 | 0 (0%)    | 0 (0%)    | 0 (0%)    | 47 (100%)  | 47  |
| 1 | 1 | _B3 | 1 | . | 1 | _E5 | 0 | 1 | _G4 | 1 | 1 | _I6 | 0 (0%)    | 0 (0%)    | 40 (100%) | 0 (0%)     | 40  |
| 1 | 1 | _B3 | 1 | . | 1 | _E5 | 1 | 1 | _G3 | . | 1 | _I5 | 0 (0%)    | 0 (0%)    | 0 (0%)    | 123 (100%) | 123 |
| 1 | 1 | _B3 | 1 | . | 1 | _E5 | 1 | 1 | _G3 | . | 1 | _I6 | 0 (0%)    | 0 (0%)    | 0 (0%)    | 123 (100%) | 123 |
| 1 | 1 | _B3 | 1 | . | 1 | _E5 | 1 | 1 | _G3 | 1 | 1 | _I5 | 0 (0%)    | 0 (0%)    | 0 (0%)    | 209 (100%) | 209 |
| 1 | 1 | _B3 | 1 | . | 1 | _E5 | 1 | 1 | _G3 | 1 | 1 | _I6 | 0 (0%)    | 0 (0%)    | 0 (0%)    | 204 (100%) | 204 |
| 1 | 1 | _B3 | 1 | . | 1 | _E5 | 1 | 1 | _G4 | . | 1 | _I5 | 0 (0%)    | 0 (0%)    | 0 (0%)    | 141 (100%) | 141 |
| 1 | 1 | _B3 | 1 | . | 1 | _E5 | 1 | 1 | _G4 | . | 1 | _I6 | 0 (0%)    | 0 (0%)    | 0 (0%)    | 120 (100%) | 120 |
| 1 | 1 | _B3 | 1 | . | 1 | _E5 | 1 | 1 | _G4 | 1 | 1 | _I5 | 0 (0%)    | 0 (0%)    | 0 (0%)    | 226 (100%) | 226 |
| 1 | 1 | _B3 | 1 | . | 1 | _E5 | 1 | 1 | _G4 | 1 | 1 | _I6 | 0 (0%)    | 0 (0%)    | 0 (0%)    | 203 (100%) | 203 |
| 1 | 1 | _B3 | 1 | 0 | 0 | _E3 | 0 | 0 | _G3 | 0 | 0 | _I5 | 0 (0%)    | 41 (100%) | 0 (0%)    | 0 (0%)     | 41  |
| 1 | 1 | _B3 | 1 | 0 | 0 | _E3 | 0 | 0 | _G3 | 0 | 0 | _I6 | 39 (100%) | 0 (0%)    | 0 (0%)    | 0 (0%)     | 39  |
| 1 | 1 | _B3 | 1 | 0 | 0 | _E3 | 0 | 0 | _G4 | 0 | 0 | _I5 | 0 (0%)    | 44 (100%) | 0 (0%)    | 0 (0%)     | 44  |
| 1 | 1 | _B3 | 1 | 0 | 0 | _E3 | 0 | 0 | _G4 | 0 | 0 | _I6 | 42 (100%) | 0 (0%)    | 0 (0%)    | 0 (0%)     | 42  |
| 1 | 1 | _B3 | 1 | 0 | 0 | _E3 | 0 | 1 | _G3 | 1 | 0 | _I5 | 0 (0%)    | 41 (100%) | 0 (0%)    | 0 (0%)     | 41  |
| 1 | 1 | _B3 | 1 | 0 | 0 | _E3 | 0 | 1 | _G3 | 1 | 1 | _I6 | 0 (0%)    | 0 (0%)    | 39 (100%) | 0 (0%)     | 39  |
| 1 | 1 | _B3 | 1 | 0 | 0 | _E3 | 0 | 1 | _G4 | 1 | 0 | _I5 | 0 (0%)    | 44 (100%) | 0 (0%)    | 0 (0%)     | 44  |
| 1 | 1 | _B3 | 1 | 0 | 0 | _E3 | 0 | 1 | _G4 | 1 | 1 | _I6 | 0 (0%)    | 0 (0%)    | 42 (100%) | 0 (0%)     | 42  |
| 1 | 1 | _B3 | 1 | 0 | 0 | _E3 | 1 | 0 | _G4 | 1 | 0 | _I5 | 0 (0%)    | 44 (100%) | 0 (0%)    | 0 (0%)     | 44  |
| 1 | 1 | _B3 | 1 | 0 | 0 | _E3 | 1 | 0 | _G4 | 1 | 1 | _I6 | 0 (0%)    | 0 (0%)    | 42 (100%) | 0 (0%)     | 42  |

|   |   |     |   |   |   |     |   |   |     |   |   |     |               |              |            |           |     |
|---|---|-----|---|---|---|-----|---|---|-----|---|---|-----|---------------|--------------|------------|-----------|-----|
| 1 | 1 | _B3 | 1 | 0 | 0 | _E3 | 1 | 1 | _G3 | 1 | 0 | _I5 | 0 (0%)        | 0 (0%)       | 0 (0%)     | 41 (100%) | 41  |
| 1 | 1 | _B3 | 1 | 0 | 0 | _E3 | 1 | 1 | _G3 | 1 | 1 | _I5 | 0 (0%)        | 0 (0%)       | 0 (0%)     | 82 (100%) | 82  |
| 1 | 1 | _B3 | 1 | 0 | 0 | _E3 | 1 | 1 | _G3 | 1 | 1 | _I6 | 0 (0%)        | 0 (0%)       | 117 (100%) | 0 (0%)    | 117 |
| 1 | 1 | _B3 | 1 | 0 | 0 | _E3 | 1 | 1 | _G4 | 1 | 1 | _I5 | 0 (0%)        | 0 (0%)       | 0 (0%)     | 88 (100%) | 88  |
| 1 | 1 | _B3 | 1 | 0 | 0 | _E3 | 1 | 1 | _G4 | 1 | 1 | _I6 | 0 (0%)        | 0 (0%)       | 42 (50%)   | 42 (50%)  | 84  |
| 1 | 1 | _B3 | 1 | 0 | 0 | _E4 | 0 | 0 | _G3 | 0 | 0 | _I5 | 12 (26.667 %) | 33 (73.333%) | 0 (0%)     | 0 (0%)    | 45  |
| 1 | 1 | _B3 | 1 | 0 | 0 | _E4 | 0 | 0 | _G3 | 0 | 0 | _I6 | 34 (100%)     | 0 (0%)       | 0 (0%)     | 0 (0%)    | 34  |
| 1 | 1 | _B3 | 1 | 0 | 0 | _E4 | 0 | 0 | _G4 | 0 | 0 | _I5 | 0 (0%)        | 40 (100%)    | 0 (0%)     | 0 (0%)    | 40  |
| 1 | 1 | _B3 | 1 | 0 | 0 | _E4 | 0 | 0 | _G4 | 0 | 0 | _I6 | 46 (100%)     | 0 (0%)       | 0 (0%)     | 0 (0%)    | 46  |
| 1 | 1 | _B3 | 1 | 0 | 0 | _E4 | 0 | 0 | _G4 | 1 | 0 | _I5 | 0 (0%)        | 40 (100%)    | 0 (0%)     | 0 (0%)    | 40  |
| 1 | 1 | _B3 | 1 | 0 | 0 | _E4 | 0 | 0 | _G4 | 1 | 1 | _I6 | 0 (0%)        | 0 (0%)       | 46 (100%)  | 0 (0%)    | 46  |
| 1 | 1 | _B3 | 1 | 0 | 0 | _E4 | 0 | 1 | _G3 | 1 | 0 | _I5 | 0 (0%)        | 180 (100%)   | 0 (0%)     | 0 (0%)    | 180 |
| 1 | 1 | _B3 | 1 | 0 | 0 | _E4 | 0 | 1 | _G3 | 1 | 1 | _I5 | 0 (0%)        | 0 (0%)       | 0 (0%)     | 59 (100%) | 59  |
| 1 | 1 | _B3 | 1 | 0 | 0 | _E4 | 0 | 1 | _G3 | 1 | 1 | _I6 | 0 (0%)        | 0 (0%)       | 182 (100%) | 0 (0%)    | 182 |
| 1 | 1 | _B3 | 1 | 0 | 0 | _E4 | 0 | 1 | _G4 | 1 | 0 | _I5 | 0 (0%)        | 120 (100%)   | 0 (0%)     | 0 (0%)    | 120 |
| 1 | 1 | _B3 | 1 | 0 | 0 | _E4 | 0 | 1 | _G4 | 1 | 1 | _I5 | 0 (0%)        | 0 (0%)       | 0 (0%)     | 54 (100%) | 54  |
| 1 | 1 | _B3 | 1 | 0 | 0 | _E4 | 0 | 1 | _G4 | 1 | 1 | _I6 | 0 (0%)        | 0 (0%)       | 197 (100%) | 0 (0%)    | 197 |
| 1 | 1 | _B3 | 1 | 0 | 0 | _E4 | 1 | 0 | _G4 | 1 | 0 | _I5 | 0 (0%)        | 40 (100%)    | 0 (0%)     | 0 (0%)    | 40  |
| 1 | 1 | _B3 | 1 | 0 | 0 | _E4 | 1 | 0 | _G4 | 1 | 1 | _I6 | 0 (0%)        | 0 (0%)       | 46 (100%)  | 0 (0%)    | 46  |
| 1 | 1 | _B3 | 1 | 0 | 0 | _E4 | 1 | 1 | _G3 | . | 1 | _I5 | 0 (0%)        | 0 (0%)       | 0 (0%)     | 17 (100%) | 17  |
| 1 | 1 | _B3 | 1 | 0 | 0 | _E4 | 1 | 1 | _G3 | . | 1 | _I6 | 0 (0%)        | 0 (0%)       | 12 (100%)  | 0 (0%)    | 12  |

|   |   |     |   |   |   |     |   |   |     |   |   |     |                    |                 |                  |                  |     |
|---|---|-----|---|---|---|-----|---|---|-----|---|---|-----|--------------------|-----------------|------------------|------------------|-----|
| 1 | 1 | _B3 | 1 | 0 | 0 | _E4 | 1 | 1 | _G3 | 1 | 0 | _I5 | 0 (0%)             | 0 (0%)          | 0 (0%)           | 135<br>(100%)    | 135 |
| 1 | 1 | _B3 | 1 | 0 | 0 | _E4 | 1 | 1 | _G3 | 1 | 1 | _I5 | 0 (0%)             | 0 (0%)          | 0 (0%)           | 159<br>(100%)    | 159 |
| 1 | 1 | _B3 | 1 | 0 | 0 | _E4 | 1 | 1 | _G3 | 1 | 1 | _I6 | 0 (0%)             | 0 (0%)          | 226<br>(97.835%) | 5<br>(2.165%)    | 231 |
| 1 | 1 | _B3 | 1 | 0 | 0 | _E4 | 1 | 1 | _G4 | . | 1 | _I5 | 0 (0%)             | 0 (0%)          | 0 (0%)           | 14 (100%)        | 14  |
| 1 | 1 | _B3 | 1 | 0 | 0 | _E4 | 1 | 1 | _G4 | . | 1 | _I6 | 0 (0%)             | 0 (0%)          | 0 (0%)           | 13 (100%)        | 13  |
| 1 | 1 | _B3 | 1 | 0 | 0 | _E4 | 1 | 1 | _G4 | 1 | 0 | _I5 | 0 (0%)             | 0 (0%)          | 0 (0%)           | 80 (100%)        | 80  |
| 1 | 1 | _B3 | 1 | 0 | 0 | _E4 | 1 | 1 | _G4 | 1 | 1 | _I5 | 0 (0%)             | 0 (0%)          | 0 (0%)           | 146<br>(100%)    | 146 |
| 1 | 1 | _B3 | 1 | 0 | 0 | _E4 | 1 | 1 | _G4 | 1 | 1 | _I6 | 0 (0%)             | 0 (0%)          | 95<br>(36.398%)  | 166<br>(63.602%) | 261 |
| 1 | 1 | _B3 | 1 | 0 | 0 | _E5 | 0 | 0 | _G3 | 0 | 0 | _I5 | 7<br>(17.073<br>%) | 34<br>(82.927%) | 0 (0%)           | 0 (0%)           | 41  |
| 1 | 1 | _B3 | 1 | 0 | 0 | _E5 | 0 | 0 | _G3 | 0 | 0 | _I6 | 41<br>(100%)       | 0 (0%)          | 0 (0%)           | 0 (0%)           | 41  |
| 1 | 1 | _B3 | 1 | 0 | 0 | _E5 | 0 | 0 | _G3 | 1 | 1 | _I6 | 0 (0%)             | 0 (0%)          | 1 (100%)         | 0 (0%)           | 1   |
| 1 | 1 | _B3 | 1 | 0 | 0 | _E5 | 0 | 0 | _G4 | 0 | 0 | _I5 | 0 (0%)             | 47 (100%)       | 0 (0%)           | 0 (0%)           | 47  |
| 1 | 1 | _B3 | 1 | 0 | 0 | _E5 | 0 | 0 | _G4 | 0 | 0 | _I6 | 40<br>(100%)       | 0 (0%)          | 0 (0%)           | 0 (0%)           | 40  |
| 1 | 1 | _B3 | 1 | 0 | 0 | _E5 | 0 | 0 | _G4 | 1 | 0 | _I5 | 0 (0%)             | 47 (100%)       | 0 (0%)           | 0 (0%)           | 47  |
| 1 | 1 | _B3 | 1 | 0 | 0 | _E5 | 0 | 0 | _G4 | 1 | 1 | _I6 | 0 (0%)             | 0 (0%)          | 40 (100%)        | 0 (0%)           | 40  |
| 1 | 1 | _B3 | 1 | 0 | 0 | _E5 | 0 | 1 | _G3 | 1 | 0 | _I5 | 0 (0%)             | 164<br>(100%)   | 0 (0%)           | 0 (0%)           | 164 |
| 1 | 1 | _B3 | 1 | 0 | 0 | _E5 | 0 | 1 | _G3 | 1 | 1 | _I5 | 0 (0%)             | 0 (0%)          | 0 (0%)           | 58 (100%)        | 58  |
| 1 | 1 | _B3 | 1 | 0 | 0 | _E5 | 0 | 1 | _G3 | 1 | 1 | _I6 | 0 (0%)             | 0 (0%)          | 216<br>(100%)    | 0 (0%)           | 216 |
| 1 | 1 | _B3 | 1 | 0 | 0 | _E5 | 0 | 1 | _G4 | 1 | 0 | _I5 | 0 (0%)             | 141<br>(100%)   | 0 (0%)           | 0 (0%)           | 141 |
| 1 | 1 | _B3 | 1 | 0 | 0 | _E5 | 0 | 1 | _G4 | 1 | 1 | _I5 | 0 (0%)             | 0 (0%)          | 0 (0%)           | 64 (100%)        | 64  |
| 1 | 1 | _B3 | 1 | 0 | 0 | _E5 | 0 | 1 | _G4 | 1 | 1 | _I6 | 0 (0%)             | 0 (0%)          | 173<br>(100%)    | 0 (0%)           | 173 |

|   |   |     |   |   |   |     |   |   |     |   |   |     |        |           |               |               |     |
|---|---|-----|---|---|---|-----|---|---|-----|---|---|-----|--------|-----------|---------------|---------------|-----|
| 1 | 1 | _B3 | 1 | 0 | 0 | _E5 | 1 | 0 | _G3 | 1 | 1 | _I6 | 0 (0%) | 0 (0%)    | 1 (100%)      | 0 (0%)        | 1   |
| 1 | 1 | _B3 | 1 | 0 | 0 | _E5 | 1 | 0 | _G4 | 1 | 0 | _I5 | 0 (0%) | 47 (100%) | 0 (0%)        | 0 (0%)        | 47  |
| 1 | 1 | _B3 | 1 | 0 | 0 | _E5 | 1 | 0 | _G4 | 1 | 1 | _I6 | 0 (0%) | 0 (0%)    | 40 (100%)     | 0 (0%)        | 40  |
| 1 | 1 | _B3 | 1 | 0 | 0 | _E5 | 1 | 1 | _G3 | . | 1 | _I5 | 0 (0%) | 0 (0%)    | 0 (0%)        | 16 (100%)     | 16  |
| 1 | 1 | _B3 | 1 | 0 | 0 | _E5 | 1 | 1 | _G3 | . | 1 | _I6 | 0 (0%) | 0 (0%)    | 15 (100%)     | 0 (0%)        | 15  |
| 1 | 1 | _B3 | 1 | 0 | 0 | _E5 | 1 | 1 | _G3 | 1 | 0 | _I5 | 0 (0%) | 0 (0%)    | 0 (0%)        | 123 (100%)    | 123 |
| 1 | 1 | _B3 | 1 | 0 | 0 | _E5 | 1 | 1 | _G3 | 1 | 1 | _I5 | 0 (0%) | 0 (0%)    | 0 (0%)        | 158 (100%)    | 158 |
| 1 | 1 | _B3 | 1 | 0 | 0 | _E5 | 1 | 1 | _G3 | 1 | 1 | _I6 | 0 (0%) | 0 (0%)    | 264 (95.307%) | 13 (4.693%)   | 277 |
| 1 | 1 | _B3 | 1 | 0 | 0 | _E5 | 1 | 1 | _G4 | . | 1 | _I5 | 0 (0%) | 0 (0%)    | 0 (0%)        | 15 (100%)     | 15  |
| 1 | 1 | _B3 | 1 | 0 | 0 | _E5 | 1 | 1 | _G4 | . | 1 | _I6 | 0 (0%) | 0 (0%)    | 0 (0%)        | 13 (100%)     | 13  |
| 1 | 1 | _B3 | 1 | 0 | 0 | _E5 | 1 | 1 | _G4 | 1 | 0 | _I5 | 0 (0%) | 0 (0%)    | 0 (0%)        | 94 (100%)     | 94  |
| 1 | 1 | _B3 | 1 | 0 | 0 | _E5 | 1 | 1 | _G4 | 1 | 1 | _I5 | 0 (0%) | 0 (0%)    | 0 (0%)        | 168 (100%)    | 168 |
| 1 | 1 | _B3 | 1 | 0 | 0 | _E5 | 1 | 1 | _G4 | 1 | 1 | _I6 | 0 (0%) | 0 (0%)    | 67 (28.511%)  | 168 (71.489%) | 235 |
| 1 | 1 | _B3 | 1 | 0 | 1 | _E3 | 0 | 0 | _G4 | 1 | 0 | _I5 | 0 (0%) | 44 (100%) | 0 (0%)        | 0 (0%)        | 44  |
| 1 | 1 | _B3 | 1 | 0 | 1 | _E3 | 0 | 0 | _G4 | 1 | 1 | _I6 | 0 (0%) | 0 (0%)    | 42 (100%)     | 0 (0%)        | 42  |
| 1 | 1 | _B3 | 1 | 0 | 1 | _E3 | 0 | 1 | _G3 | 1 | 0 | _I5 | 0 (0%) | 41 (25%)  | 0 (0%)        | 123 (75%)     | 164 |
| 1 | 1 | _B3 | 1 | 0 | 1 | _E3 | 0 | 1 | _G3 | 1 | 1 | _I5 | 0 (0%) | 0 (0%)    | 0 (0%)        | 123 (100%)    | 123 |
| 1 | 1 | _B3 | 1 | 0 | 1 | _E3 | 0 | 1 | _G3 | 1 | 1 | _I6 | 0 (0%) | 0 (0%)    | 273 (100%)    | 0 (0%)        | 273 |
| 1 | 1 | _B3 | 1 | 0 | 1 | _E3 | 0 | 1 | _G4 | 1 | 0 | _I5 | 0 (0%) | 0 (0%)    | 0 (0%)        | 132 (100%)    | 132 |
| 1 | 1 | _B3 | 1 | 0 | 1 | _E3 | 0 | 1 | _G4 | 1 | 1 | _I5 | 0 (0%) | 0 (0%)    | 0 (0%)        | 132 (100%)    | 132 |
| 1 | 1 | _B3 | 1 | 0 | 1 | _E3 | 0 | 1 | _G4 | 1 | 1 | _I6 | 0 (0%) | 0 (0%)    | 252 (100%)    | 0 (0%)        | 252 |

|   |   |     |   |   |   |     |   |   |     |   |   |     |        |        |             |             |      |
|---|---|-----|---|---|---|-----|---|---|-----|---|---|-----|--------|--------|-------------|-------------|------|
| 1 | 1 | _B3 | 1 | 0 | 1 | _E3 | 1 | 1 | _G3 | . | 1 | _I5 | 0 (0%) | 0 (0%) | 0 (0%)      | 205 (100%)  | 205  |
| 1 | 1 | _B3 | 1 | 0 | 1 | _E3 | 1 | 1 | _G3 | . | 1 | _I6 | 0 (0%) | 0 (0%) | 0 (0%)      | 195 (100%)  | 195  |
| 1 | 1 | _B3 | 1 | 0 | 1 | _E3 | 1 | 1 | _G3 | 1 | 0 | _I5 | 0 (0%) | 0 (0%) | 0 (0%)      | 123 (100%)  | 123  |
| 1 | 1 | _B3 | 1 | 0 | 1 | _E3 | 1 | 1 | _G3 | 1 | 1 | _I5 | 0 (0%) | 0 (0%) | 0 (0%)      | 1640 (100%) | 1640 |
| 1 | 1 | _B3 | 1 | 0 | 1 | _E3 | 1 | 1 | _G3 | 1 | 1 | _I6 | 0 (0%) | 0 (0%) | 0 (0%)      | 1677 (100%) | 1677 |
| 1 | 1 | _B3 | 1 | 0 | 1 | _E3 | 1 | 1 | _G4 | . | 1 | _I5 | 0 (0%) | 0 (0%) | 0 (0%)      | 220 (100%)  | 220  |
| 1 | 1 | _B3 | 1 | 0 | 1 | _E3 | 1 | 1 | _G4 | . | 1 | _I6 | 0 (0%) | 0 (0%) | 0 (0%)      | 210 (100%)  | 210  |
| 1 | 1 | _B3 | 1 | 0 | 1 | _E3 | 1 | 1 | _G4 | 1 | 0 | _I5 | 0 (0%) | 0 (0%) | 0 (0%)      | 132 (100%)  | 132  |
| 1 | 1 | _B3 | 1 | 0 | 1 | _E3 | 1 | 1 | _G4 | 1 | 1 | _I5 | 0 (0%) | 0 (0%) | 0 (0%)      | 1760 (100%) | 1760 |
| 1 | 1 | _B3 | 1 | 0 | 1 | _E3 | 1 | 1 | _G4 | 1 | 1 | _I6 | 0 (0%) | 0 (0%) | 0 (0%)      | 1806 (100%) | 1806 |
| 1 | 1 | _B3 | 1 | 0 | 1 | _E4 | 0 | 1 | _G3 | 1 | 0 | _I5 | 0 (0%) | 0 (0%) | 0 (0%)      | 45 (100%)   | 45   |
| 1 | 1 | _B3 | 1 | 0 | 1 | _E4 | 0 | 1 | _G3 | 1 | 1 | _I5 | 0 (0%) | 0 (0%) | 0 (0%)      | 76 (100%)   | 76   |
| 1 | 1 | _B3 | 1 | 0 | 1 | _E4 | 0 | 1 | _G3 | 1 | 1 | _I6 | 0 (0%) | 0 (0%) | 90 (100%)   | 0 (0%)      | 90   |
| 1 | 1 | _B3 | 1 | 0 | 1 | _E4 | 0 | 1 | _G4 | 1 | 0 | _I5 | 0 (0%) | 0 (0%) | 0 (0%)      | 40 (100%)   | 40   |
| 1 | 1 | _B3 | 1 | 0 | 1 | _E4 | 0 | 1 | _G4 | 1 | 1 | _I5 | 0 (0%) | 0 (0%) | 0 (0%)      | 66 (100%)   | 66   |
| 1 | 1 | _B3 | 1 | 0 | 1 | _E4 | 0 | 1 | _G4 | 1 | 1 | _I6 | 0 (0%) | 0 (0%) | 117 (93.6%) | 8 (6.4%)    | 125  |
| 1 | 1 | _B3 | 1 | 0 | 1 | _E4 | 1 | 1 | _G3 | . | 1 | _I5 | 0 (0%) | 0 (0%) | 0 (0%)      | 208 (100%)  | 208  |
| 1 | 1 | _B3 | 1 | 0 | 1 | _E4 | 1 | 1 | _G3 | . | 1 | _I6 | 0 (0%) | 0 (0%) | 0 (0%)      | 158 (100%)  | 158  |
| 1 | 1 | _B3 | 1 | 0 | 1 | _E4 | 1 | 1 | _G3 | 1 | 0 | _I5 | 0 (0%) | 0 (0%) | 0 (0%)      | 45 (100%)   | 45   |
| 1 | 1 | _B3 | 1 | 0 | 1 | _E4 | 1 | 1 | _G3 | 1 | 1 | _I5 | 0 (0%) | 0 (0%) | 0 (0%)      | 1731 (100%) | 1731 |
| 1 | 1 | _B3 | 1 | 0 | 1 | _E4 | 1 | 1 | _G3 | 1 | 1 | _I6 | 0 (0%) | 0 (0%) | 0 (0%)      | 1333 (100%) | 1333 |

*Supplemental material is neither peer-reviewed nor thoroughly edited by CJASN. The authors alone are responsible for the accuracy and presentation of the material.*

|   |   |     |   |   |   |     |   |   |     |   |   |     |        |        |                 |                |      |
|---|---|-----|---|---|---|-----|---|---|-----|---|---|-----|--------|--------|-----------------|----------------|------|
| 1 | 1 | _B3 | 1 | 0 | 1 | _E4 | 1 | 1 | _G4 | . | 1 | _I5 | 0 (0%) | 0 (0%) | 0 (0%)          | 186<br>(100%)  | 186  |
| 1 | 1 | _B3 | 1 | 0 | 1 | _E4 | 1 | 1 | _G4 | . | 1 | _I6 | 0 (0%) | 0 (0%) | 0 (0%)          | 217<br>(100%)  | 217  |
| 1 | 1 | _B3 | 1 | 0 | 1 | _E4 | 1 | 1 | _G4 | 1 | 0 | _I5 | 0 (0%) | 0 (0%) | 0 (0%)          | 40 (100%)      | 40   |
| 1 | 1 | _B3 | 1 | 0 | 1 | _E4 | 1 | 1 | _G4 | 1 | 1 | _I5 | 0 (0%) | 0 (0%) | 0 (0%)          | 1534<br>(100%) | 1534 |
| 1 | 1 | _B3 | 1 | 0 | 1 | _E4 | 1 | 1 | _G4 | 1 | 1 | _I6 | 0 (0%) | 0 (0%) | 0 (0%)          | 1809<br>(100%) | 1809 |
| 1 | 1 | _B3 | 1 | 0 | 1 | _E5 | 0 | 1 | _G3 | 1 | 0 | _I5 | 0 (0%) | 0 (0%) | 0 (0%)          | 41 (100%)      | 41   |
| 1 | 1 | _B3 | 1 | 0 | 1 | _E5 | 0 | 1 | _G3 | 1 | 1 | _I5 | 0 (0%) | 0 (0%) | 0 (0%)          | 65 (100%)      | 65   |
| 1 | 1 | _B3 | 1 | 0 | 1 | _E5 | 0 | 1 | _G3 | 1 | 1 | _I6 | 0 (0%) | 0 (0%) | 111<br>(100%)   | 0 (0%)         | 111  |
| 1 | 1 | _B3 | 1 | 0 | 1 | _E5 | 0 | 1 | _G4 | 1 | 0 | _I5 | 0 (0%) | 0 (0%) | 0 (0%)          | 47 (100%)      | 47   |
| 1 | 1 | _B3 | 1 | 0 | 1 | _E5 | 0 | 1 | _G4 | 1 | 1 | _I5 | 0 (0%) | 0 (0%) | 0 (0%)          | 77 (100%)      | 77   |
| 1 | 1 | _B3 | 1 | 0 | 1 | _E5 | 0 | 1 | _G4 | 1 | 1 | _I6 | 0 (0%) | 0 (0%) | 98<br>(91.589%) | 9<br>(8.411%)  | 107  |
| 1 | 1 | _B3 | 1 | 0 | 1 | _E5 | 1 | 1 | _G3 | . | 1 | _I5 | 0 (0%) | 0 (0%) | 0 (0%)          | 189<br>(100%)  | 189  |
| 1 | 1 | _B3 | 1 | 0 | 1 | _E5 | 1 | 1 | _G3 | . | 1 | _I6 | 0 (0%) | 0 (0%) | 0 (0%)          | 190<br>(100%)  | 190  |
| 1 | 1 | _B3 | 1 | 0 | 1 | _E5 | 1 | 1 | _G3 | 1 | 0 | _I5 | 0 (0%) | 0 (0%) | 0 (0%)          | 41 (100%)      | 41   |
| 1 | 1 | _B3 | 1 | 0 | 1 | _E5 | 1 | 1 | _G3 | 1 | 1 | _I5 | 0 (0%) | 0 (0%) | 0 (0%)          | 1564<br>(100%) | 1564 |
| 1 | 1 | _B3 | 1 | 0 | 1 | _E5 | 1 | 1 | _G3 | 1 | 1 | _I6 | 0 (0%) | 0 (0%) | 0 (0%)          | 1608<br>(100%) | 1608 |
| 1 | 1 | _B3 | 1 | 0 | 1 | _E5 | 1 | 1 | _G4 | . | 1 | _I5 | 0 (0%) | 0 (0%) | 0 (0%)          | 220<br>(100%)  | 220  |
| 1 | 1 | _B3 | 1 | 0 | 1 | _E5 | 1 | 1 | _G4 | . | 1 | _I6 | 0 (0%) | 0 (0%) | 0 (0%)          | 187<br>(100%)  | 187  |
| 1 | 1 | _B3 | 1 | 0 | 1 | _E5 | 1 | 1 | _G4 | 1 | 0 | _I5 | 0 (0%) | 0 (0%) | 0 (0%)          | 47 (100%)      | 47   |
| 1 | 1 | _B3 | 1 | 0 | 1 | _E5 | 1 | 1 | _G4 | 1 | 1 | _I5 | 0 (0%) | 0 (0%) | 0 (0%)          | 1806<br>(100%) | 1806 |
| 1 | 1 | _B3 | 1 | 0 | 1 | _E5 | 1 | 1 | _G4 | 1 | 1 | _I6 | 0 (0%) | 0 (0%) | 0 (0%)          | 1565<br>(100%) | 1565 |

Supplemental material is neither peer-reviewed nor thoroughly edited by CJASN. The authors alone are responsible for the accuracy and presentation of the material.

|   |   |     |   |   |   |     |   |   |     |   |   |     |        |           |           |            |     |
|---|---|-----|---|---|---|-----|---|---|-----|---|---|-----|--------|-----------|-----------|------------|-----|
| 1 | 1 | _B3 | 1 | 1 | 0 | _E4 | 0 | 1 | _G3 | 1 | 1 | _I5 | 0 (0%) | 0 (0%)    | 0 (0%)    | 45 (100%)  | 45  |
| 1 | 1 | _B3 | 1 | 1 | 0 | _E4 | 0 | 1 | _G3 | 1 | 1 | _I6 | 0 (0%) | 0 (0%)    | 34 (100%) | 0 (0%)     | 34  |
| 1 | 1 | _B3 | 1 | 1 | 0 | _E4 | 0 | 1 | _G4 | 1 | 1 | _I5 | 0 (0%) | 0 (0%)    | 0 (0%)    | 40 (100%)  | 40  |
| 1 | 1 | _B3 | 1 | 1 | 0 | _E4 | 0 | 1 | _G4 | 1 | 1 | _I6 | 0 (0%) | 0 (0%)    | 46 (100%) | 0 (0%)     | 46  |
| 1 | 1 | _B3 | 1 | 1 | 0 | _E5 | 0 | 1 | _G3 | 1 | 1 | _I5 | 0 (0%) | 0 (0%)    | 0 (0%)    | 41 (100%)  | 41  |
| 1 | 1 | _B3 | 1 | 1 | 0 | _E5 | 0 | 1 | _G3 | 1 | 1 | _I6 | 0 (0%) | 0 (0%)    | 41 (100%) | 0 (0%)     | 41  |
| 1 | 1 | _B3 | 1 | 1 | 0 | _E5 | 0 | 1 | _G4 | 1 | 1 | _I5 | 0 (0%) | 0 (0%)    | 0 (0%)    | 47 (100%)  | 47  |
| 1 | 1 | _B3 | 1 | 1 | 0 | _E5 | 0 | 1 | _G4 | 1 | 1 | _I6 | 0 (0%) | 0 (0%)    | 40 (100%) | 0 (0%)     | 40  |
| 1 | 1 | _B3 | 1 | 1 | 1 | _E3 | 0 | 1 | _G3 | 1 | 1 | _I5 | 0 (0%) | 0 (0%)    | 0 (0%)    | 41 (100%)  | 41  |
| 1 | 1 | _B3 | 1 | 1 | 1 | _E3 | 0 | 1 | _G3 | 1 | 1 | _I6 | 0 (0%) | 0 (0%)    | 39 (100%) | 0 (0%)     | 39  |
| 1 | 1 | _B3 | 1 | 1 | 1 | _E3 | 0 | 1 | _G4 | 1 | 1 | _I5 | 0 (0%) | 0 (0%)    | 0 (0%)    | 44 (100%)  | 44  |
| 1 | 1 | _B3 | 1 | 1 | 1 | _E3 | 0 | 1 | _G4 | 1 | 1 | _I6 | 0 (0%) | 0 (0%)    | 0 (0%)    | 42 (100%)  | 42  |
| 1 | 1 | _B3 | 1 | 1 | 1 | _E3 | 1 | 1 | _G3 | . | 1 | _I5 | 0 (0%) | 0 (0%)    | 0 (0%)    | 41 (100%)  | 41  |
| 1 | 1 | _B3 | 1 | 1 | 1 | _E3 | 1 | 1 | _G3 | . | 1 | _I6 | 0 (0%) | 0 (0%)    | 0 (0%)    | 39 (100%)  | 39  |
| 1 | 1 | _B3 | 1 | 1 | 1 | _E3 | 1 | 1 | _G3 | 0 | 0 | _I6 | 0 (0%) | 39 (100%) | 0 (0%)    | 0 (0%)     | 39  |
| 1 | 1 | _B3 | 1 | 1 | 1 | _E3 | 1 | 1 | _G3 | 0 | 1 | _I5 | 0 (0%) | 0 (0%)    | 0 (0%)    | 41 (100%)  | 41  |
| 1 | 1 | _B3 | 1 | 1 | 1 | _E3 | 1 | 1 | _G3 | 1 | 1 | _I5 | 0 (0%) | 0 (0%)    | 0 (0%)    | 779 (100%) | 779 |
| 1 | 1 | _B3 | 1 | 1 | 1 | _E3 | 1 | 1 | _G3 | 1 | 1 | _I6 | 0 (0%) | 0 (0%)    | 0 (0%)    | 741 (100%) | 741 |
| 1 | 1 | _B3 | 1 | 1 | 1 | _E3 | 1 | 1 | _G4 | . | 1 | _I5 | 0 (0%) | 0 (0%)    | 0 (0%)    | 44 (100%)  | 44  |
| 1 | 1 | _B3 | 1 | 1 | 1 | _E3 | 1 | 1 | _G4 | . | 1 | _I6 | 0 (0%) | 0 (0%)    | 0 (0%)    | 42 (100%)  | 42  |
| 1 | 1 | _B3 | 1 | 1 | 1 | _E3 | 1 | 1 | _G4 | 0 | 0 | _I6 | 0 (0%) | 42 (100%) | 0 (0%)    | 0 (0%)     | 42  |

Supplemental material is neither peer-reviewed nor thoroughly edited by CJASN. The authors alone are responsible for the accuracy and presentation of the material.

|   |   |     |   |   |   |     |   |   |     |   |   |     |        |           |        |            |     |
|---|---|-----|---|---|---|-----|---|---|-----|---|---|-----|--------|-----------|--------|------------|-----|
| 1 | 1 | _B3 | 1 | 1 | 1 | _E3 | 1 | 1 | _G4 | 0 | 1 | _I5 | 0 (0%) | 0 (0%)    | 0 (0%) | 44 (100%)  | 44  |
| 1 | 1 | _B3 | 1 | 1 | 1 | _E3 | 1 | 1 | _G4 | 1 | 1 | _I5 | 0 (0%) | 0 (0%)    | 0 (0%) | 836 (100%) | 836 |
| 1 | 1 | _B3 | 1 | 1 | 1 | _E3 | 1 | 1 | _G4 | 1 | 1 | _I6 | 0 (0%) | 0 (0%)    | 0 (0%) | 798 (100%) | 798 |
| 1 | 1 | _B3 | 1 | 1 | 1 | _E4 | 1 | 1 | _G3 | . | 1 | _I5 | 0 (0%) | 0 (0%)    | 0 (0%) | 45 (100%)  | 45  |
| 1 | 1 | _B3 | 1 | 1 | 1 | _E4 | 1 | 1 | _G3 | . | 1 | _I6 | 0 (0%) | 0 (0%)    | 0 (0%) | 34 (100%)  | 34  |
| 1 | 1 | _B3 | 1 | 1 | 1 | _E4 | 1 | 1 | _G3 | 0 | 0 | _I6 | 0 (0%) | 34 (100%) | 0 (0%) | 0 (0%)     | 34  |
| 1 | 1 | _B3 | 1 | 1 | 1 | _E4 | 1 | 1 | _G3 | 0 | 1 | _I5 | 0 (0%) | 0 (0%)    | 0 (0%) | 45 (100%)  | 45  |
| 1 | 1 | _B3 | 1 | 1 | 1 | _E4 | 1 | 1 | _G3 | 1 | 1 | _I5 | 0 (0%) | 0 (0%)    | 0 (0%) | 855 (100%) | 855 |
| 1 | 1 | _B3 | 1 | 1 | 1 | _E4 | 1 | 1 | _G3 | 1 | 1 | _I6 | 0 (0%) | 0 (0%)    | 0 (0%) | 646 (100%) | 646 |
| 1 | 1 | _B3 | 1 | 1 | 1 | _E4 | 1 | 1 | _G4 | . | 1 | _I5 | 0 (0%) | 0 (0%)    | 0 (0%) | 40 (100%)  | 40  |
| 1 | 1 | _B3 | 1 | 1 | 1 | _E4 | 1 | 1 | _G4 | . | 1 | _I6 | 0 (0%) | 0 (0%)    | 0 (0%) | 46 (100%)  | 46  |
| 1 | 1 | _B3 | 1 | 1 | 1 | _E4 | 1 | 1 | _G4 | 0 | 0 | _I6 | 0 (0%) | 46 (100%) | 0 (0%) | 0 (0%)     | 46  |
| 1 | 1 | _B3 | 1 | 1 | 1 | _E4 | 1 | 1 | _G4 | 0 | 1 | _I5 | 0 (0%) | 0 (0%)    | 0 (0%) | 40 (100%)  | 40  |
| 1 | 1 | _B3 | 1 | 1 | 1 | _E4 | 1 | 1 | _G4 | 1 | 1 | _I5 | 0 (0%) | 0 (0%)    | 0 (0%) | 760 (100%) | 760 |
| 1 | 1 | _B3 | 1 | 1 | 1 | _E4 | 1 | 1 | _G4 | 1 | 1 | _I6 | 0 (0%) | 0 (0%)    | 0 (0%) | 874 (100%) | 874 |
| 1 | 1 | _B3 | 1 | 1 | 1 | _E5 | 1 | 1 | _G3 | . | 1 | _I5 | 0 (0%) | 0 (0%)    | 0 (0%) | 41 (100%)  | 41  |
| 1 | 1 | _B3 | 1 | 1 | 1 | _E5 | 1 | 1 | _G3 | . | 1 | _I6 | 0 (0%) | 0 (0%)    | 0 (0%) | 41 (100%)  | 41  |
| 1 | 1 | _B3 | 1 | 1 | 1 | _E5 | 1 | 1 | _G3 | 0 | 0 | _I6 | 0 (0%) | 41 (100%) | 0 (0%) | 0 (0%)     | 41  |
| 1 | 1 | _B3 | 1 | 1 | 1 | _E5 | 1 | 1 | _G3 | 0 | 1 | _I5 | 0 (0%) | 0 (0%)    | 0 (0%) | 41 (100%)  | 41  |
| 1 | 1 | _B3 | 1 | 1 | 1 | _E5 | 1 | 1 | _G3 | 1 | 1 | _I5 | 0 (0%) | 0 (0%)    | 0 (0%) | 779 (100%) | 779 |
| 1 | 1 | _B3 | 1 | 1 | 1 | _E5 | 1 | 1 | _G3 | 1 | 1 | _I6 | 0 (0%) | 0 (0%)    | 0 (0%) | 779 (100%) | 779 |

Supplemental material is neither peer-reviewed nor thoroughly edited by CJASN. The authors alone are responsible for the accuracy and presentation of the material.

|   |   |     |   |   |   |     |   |   |     |   |   |     |        |           |           |            |     |
|---|---|-----|---|---|---|-----|---|---|-----|---|---|-----|--------|-----------|-----------|------------|-----|
| 1 | 1 | _B3 | 1 | 1 | 1 | _E5 | 1 | 1 | _G4 | . | 1 | _I5 | 0 (0%) | 0 (0%)    | 0 (0%)    | 47 (100%)  | 47  |
| 1 | 1 | _B3 | 1 | 1 | 1 | _E5 | 1 | 1 | _G4 | . | 1 | _I6 | 0 (0%) | 0 (0%)    | 0 (0%)    | 40 (100%)  | 40  |
| 1 | 1 | _B3 | 1 | 1 | 1 | _E5 | 1 | 1 | _G4 | 0 | 0 | _I6 | 0 (0%) | 40 (100%) | 0 (0%)    | 0 (0%)     | 40  |
| 1 | 1 | _B3 | 1 | 1 | 1 | _E5 | 1 | 1 | _G4 | 0 | 1 | _I5 | 0 (0%) | 0 (0%)    | 0 (0%)    | 47 (100%)  | 47  |
| 1 | 1 | _B3 | 1 | 1 | 1 | _E5 | 1 | 1 | _G4 | 1 | 1 | _I5 | 0 (0%) | 0 (0%)    | 0 (0%)    | 893 (100%) | 893 |
| 1 | 1 | _B3 | 1 | 1 | 1 | _E5 | 1 | 1 | _G4 | 1 | 1 | _I6 | 0 (0%) | 0 (0%)    | 0 (0%)    | 760 (100%) | 760 |
| 1 | 1 | _B5 | 0 | . | 0 | _E3 | 0 | 1 | _G3 | . | 0 | _I6 | 0 (0%) | 42 (100%) | 0 (0%)    | 0 (0%)     | 42  |
| 1 | 1 | _B5 | 0 | . | 0 | _E3 | 0 | 1 | _G3 | . | 1 | _I5 | 0 (0%) | 0 (0%)    | 37 (100%) | 0 (0%)     | 37  |
| 1 | 1 | _B5 | 0 | . | 0 | _E3 | 0 | 1 | _G3 | 0 | 0 | _I5 | 0 (0%) | 37 (100%) | 0 (0%)    | 0 (0%)     | 37  |
| 1 | 1 | _B5 | 0 | . | 0 | _E3 | 0 | 1 | _G3 | 0 | 0 | _I6 | 0 (0%) | 42 (100%) | 0 (0%)    | 0 (0%)     | 42  |
| 1 | 1 | _B5 | 0 | . | 0 | _E3 | 0 | 1 | _G4 | . | 0 | _I6 | 0 (0%) | 42 (100%) | 0 (0%)    | 0 (0%)     | 42  |
| 1 | 1 | _B5 | 0 | . | 0 | _E3 | 0 | 1 | _G4 | . | 1 | _I5 | 0 (0%) | 0 (0%)    | 42 (100%) | 0 (0%)     | 42  |
| 1 | 1 | _B5 | 0 | . | 0 | _E3 | 0 | 1 | _G4 | 0 | 0 | _I5 | 0 (0%) | 42 (100%) | 0 (0%)    | 0 (0%)     | 42  |
| 1 | 1 | _B5 | 0 | . | 0 | _E3 | 0 | 1 | _G4 | 0 | 0 | _I6 | 0 (0%) | 42 (100%) | 0 (0%)    | 0 (0%)     | 42  |
| 1 | 1 | _B5 | 0 | . | 0 | _E4 | 0 | 1 | _G3 | . | 0 | _I6 | 0 (0%) | 38 (100%) | 0 (0%)    | 0 (0%)     | 38  |
| 1 | 1 | _B5 | 0 | . | 0 | _E4 | 0 | 1 | _G3 | . | 1 | _I5 | 0 (0%) | 0 (0%)    | 45 (100%) | 0 (0%)     | 45  |
| 1 | 1 | _B5 | 0 | . | 0 | _E4 | 0 | 1 | _G3 | 0 | 0 | _I5 | 0 (0%) | 90 (100%) | 0 (0%)    | 0 (0%)     | 90  |
| 1 | 1 | _B5 | 0 | . | 0 | _E4 | 0 | 1 | _G3 | 0 | 0 | _I6 | 0 (0%) | 76 (100%) | 0 (0%)    | 0 (0%)     | 76  |
| 1 | 1 | _B5 | 0 | . | 0 | _E4 | 0 | 1 | _G4 | . | 0 | _I6 | 0 (0%) | 47 (100%) | 0 (0%)    | 0 (0%)     | 47  |
| 1 | 1 | _B5 | 0 | . | 0 | _E4 | 0 | 1 | _G4 | . | 1 | _I5 | 0 (0%) | 0 (0%)    | 36 (100%) | 0 (0%)     | 36  |
| 1 | 1 | _B5 | 0 | . | 0 | _E4 | 0 | 1 | _G4 | 0 | 0 | _I5 | 0 (0%) | 72 (100%) | 0 (0%)    | 0 (0%)     | 72  |

|   |   |     |   |   |   |     |   |   |     |   |   |     |        |                 |               |        |     |
|---|---|-----|---|---|---|-----|---|---|-----|---|---|-----|--------|-----------------|---------------|--------|-----|
| 1 | 1 | _B5 | 0 | . | 0 | _E4 | 0 | 1 | _G4 | 0 | 0 | _I6 | 0 (0%) | 94 (100%)       | 0 (0%)        | 0 (0%) | 94  |
| 1 | 1 | _B5 | 0 | . | 0 | _E5 | 0 | 1 | _G3 | . | 0 | _I6 | 0 (0%) | 48<br>(97.959%) | 1<br>(2.041%) | 0 (0%) | 49  |
| 1 | 1 | _B5 | 0 | . | 0 | _E5 | 0 | 1 | _G3 | . | 1 | _I5 | 0 (0%) | 0 (0%)          | 34 (100%)     | 0 (0%) | 34  |
| 1 | 1 | _B5 | 0 | . | 0 | _E5 | 0 | 1 | _G3 | 0 | 0 | _I5 | 0 (0%) | 68 (100%)       | 0 (0%)        | 0 (0%) | 68  |
| 1 | 1 | _B5 | 0 | . | 0 | _E5 | 0 | 1 | _G3 | 0 | 0 | _I6 | 0 (0%) | 96<br>(97.959%) | 2<br>(2.041%) | 0 (0%) | 98  |
| 1 | 1 | _B5 | 0 | . | 0 | _E5 | 0 | 1 | _G4 | . | 0 | _I6 | 0 (0%) | 39 (100%)       | 0 (0%)        | 0 (0%) | 39  |
| 1 | 1 | _B5 | 0 | . | 0 | _E5 | 0 | 1 | _G4 | . | 1 | _I5 | 0 (0%) | 0 (0%)          | 49 (100%)     | 0 (0%) | 49  |
| 1 | 1 | _B5 | 0 | . | 0 | _E5 | 0 | 1 | _G4 | 0 | 0 | _I5 | 0 (0%) | 98 (100%)       | 0 (0%)        | 0 (0%) | 98  |
| 1 | 1 | _B5 | 0 | . | 0 | _E5 | 0 | 1 | _G4 | 0 | 0 | _I6 | 0 (0%) | 78 (100%)       | 0 (0%)        | 0 (0%) | 78  |
| 1 | 1 | _B5 | 0 | . | 1 | _E3 | 0 | 1 | _G3 | . | 0 | _I6 | 0 (0%) | 42 (100%)       | 0 (0%)        | 0 (0%) | 42  |
| 1 | 1 | _B5 | 0 | . | 1 | _E3 | 0 | 1 | _G3 | . | 1 | _I5 | 0 (0%) | 0 (0%)          | 37 (100%)     | 0 (0%) | 37  |
| 1 | 1 | _B5 | 0 | . | 1 | _E3 | 0 | 1 | _G3 | 0 | 0 | _I5 | 0 (0%) | 37 (100%)       | 0 (0%)        | 0 (0%) | 37  |
| 1 | 1 | _B5 | 0 | . | 1 | _E3 | 0 | 1 | _G3 | 0 | 0 | _I6 | 0 (0%) | 168<br>(100%)   | 0 (0%)        | 0 (0%) | 168 |
| 1 | 1 | _B5 | 0 | . | 1 | _E3 | 0 | 1 | _G3 | 0 | 1 | _I5 | 0 (0%) | 0 (0%)          | 111<br>(100%) | 0 (0%) | 111 |
| 1 | 1 | _B5 | 0 | . | 1 | _E3 | 0 | 1 | _G4 | . | 0 | _I6 | 0 (0%) | 42 (100%)       | 0 (0%)        | 0 (0%) | 42  |
| 1 | 1 | _B5 | 0 | . | 1 | _E3 | 0 | 1 | _G4 | . | 1 | _I5 | 0 (0%) | 0 (0%)          | 42 (100%)     | 0 (0%) | 42  |
| 1 | 1 | _B5 | 0 | . | 1 | _E3 | 0 | 1 | _G4 | 0 | 0 | _I5 | 0 (0%) | 0 (0%)          | 42 (100%)     | 0 (0%) | 42  |
| 1 | 1 | _B5 | 0 | . | 1 | _E3 | 0 | 1 | _G4 | 0 | 0 | _I6 | 0 (0%) | 168<br>(100%)   | 0 (0%)        | 0 (0%) | 168 |
| 1 | 1 | _B5 | 0 | . | 1 | _E3 | 0 | 1 | _G4 | 0 | 1 | _I5 | 0 (0%) | 0 (0%)          | 126<br>(100%) | 0 (0%) | 126 |
| 1 | 1 | _B5 | 0 | . | 1 | _E3 | 1 | 1 | _G3 | 1 | 1 | _I5 | 0 (0%) | 0 (0%)          | 37 (100%)     | 0 (0%) | 37  |
| 1 | 1 | _B5 | 0 | . | 1 | _E3 | 1 | 1 | _G3 | 1 | 1 | _I6 | 0 (0%) | 0 (0%)          | 42 (100%)     | 0 (0%) | 42  |

*Supplemental material is neither peer-reviewed nor thoroughly edited by CJASN. The authors alone are responsible for the accuracy and presentation of the material.*

|   |   |     |   |   |   |     |   |   |     |   |   |     |        |               |              |              |     |
|---|---|-----|---|---|---|-----|---|---|-----|---|---|-----|--------|---------------|--------------|--------------|-----|
| 1 | 1 | _B5 | 0 | . | 1 | _E3 | 1 | 1 | _G4 | 1 | 1 | _I5 | 0 (0%) | 0 (0%)        | 42 (100%)    | 0 (0%)       | 42  |
| 1 | 1 | _B5 | 0 | . | 1 | _E3 | 1 | 1 | _G4 | 1 | 1 | _I6 | 0 (0%) | 0 (0%)        | 0 (0%)       | 42 (100%)    | 42  |
| 1 | 1 | _B5 | 0 | . | 1 | _E4 | 0 | 1 | _G3 | . | 0 | _I6 | 0 (0%) | 38 (100%)     | 0 (0%)       | 0 (0%)       | 38  |
| 1 | 1 | _B5 | 0 | . | 1 | _E4 | 0 | 1 | _G3 | . | 1 | _I5 | 0 (0%) | 0 (0%)        | 45 (100%)    | 0 (0%)       | 45  |
| 1 | 1 | _B5 | 0 | . | 1 | _E4 | 0 | 1 | _G3 | 0 | 0 | _I6 | 0 (0%) | 114 (100%)    | 0 (0%)       | 0 (0%)       | 114 |
| 1 | 1 | _B5 | 0 | . | 1 | _E4 | 0 | 1 | _G3 | 0 | 1 | _I5 | 0 (0%) | 0 (0%)        | 135 (100%)   | 0 (0%)       | 135 |
| 1 | 1 | _B5 | 0 | . | 1 | _E4 | 0 | 1 | _G4 | . | 0 | _I6 | 0 (0%) | 47 (100%)     | 0 (0%)       | 0 (0%)       | 47  |
| 1 | 1 | _B5 | 0 | . | 1 | _E4 | 0 | 1 | _G4 | . | 1 | _I5 | 0 (0%) | 0 (0%)        | 36 (100%)    | 0 (0%)       | 36  |
| 1 | 1 | _B5 | 0 | . | 1 | _E4 | 0 | 1 | _G4 | 0 | 0 | _I6 | 0 (0%) | 141 (100%)    | 0 (0%)       | 0 (0%)       | 141 |
| 1 | 1 | _B5 | 0 | . | 1 | _E4 | 0 | 1 | _G4 | 0 | 1 | _I5 | 0 (0%) | 0 (0%)        | 108 (100%)   | 0 (0%)       | 108 |
| 1 | 1 | _B5 | 0 | . | 1 | _E4 | 1 | 1 | _G3 | 1 | 1 | _I5 | 0 (0%) | 0 (0%)        | 45 (100%)    | 0 (0%)       | 45  |
| 1 | 1 | _B5 | 0 | . | 1 | _E4 | 1 | 1 | _G3 | 1 | 1 | _I6 | 0 (0%) | 0 (0%)        | 33 (86.842%) | 5 (13.158%)  | 38  |
| 1 | 1 | _B5 | 0 | . | 1 | _E4 | 1 | 1 | _G4 | 1 | 1 | _I5 | 0 (0%) | 0 (0%)        | 36 (100%)    | 0 (0%)       | 36  |
| 1 | 1 | _B5 | 0 | . | 1 | _E4 | 1 | 1 | _G4 | 1 | 1 | _I6 | 0 (0%) | 0 (0%)        | 1 (2.128%)   | 46 (97.872%) | 47  |
| 1 | 1 | _B5 | 0 | . | 1 | _E5 | 0 | 1 | _G3 | . | 0 | _I6 | 0 (0%) | 48 (97.959%)  | 1 (2.041%)   | 0 (0%)       | 49  |
| 1 | 1 | _B5 | 0 | . | 1 | _E5 | 0 | 1 | _G3 | . | 1 | _I5 | 0 (0%) | 0 (0%)        | 34 (100%)    | 0 (0%)       | 34  |
| 1 | 1 | _B5 | 0 | . | 1 | _E5 | 0 | 1 | _G3 | 0 | 0 | _I6 | 0 (0%) | 144 (97.959%) | 3 (2.041%)   | 0 (0%)       | 147 |
| 1 | 1 | _B5 | 0 | . | 1 | _E5 | 0 | 1 | _G3 | 0 | 1 | _I5 | 0 (0%) | 0 (0%)        | 102 (100%)   | 0 (0%)       | 102 |
| 1 | 1 | _B5 | 0 | . | 1 | _E5 | 0 | 1 | _G4 | . | 0 | _I6 | 0 (0%) | 39 (100%)     | 0 (0%)       | 0 (0%)       | 39  |
| 1 | 1 | _B5 | 0 | . | 1 | _E5 | 0 | 1 | _G4 | . | 1 | _I5 | 0 (0%) | 0 (0%)        | 49 (100%)    | 0 (0%)       | 49  |
| 1 | 1 | _B5 | 0 | . | 1 | _E5 | 0 | 1 | _G4 | 0 | 0 | _I6 | 0 (0%) | 117 (100%)    | 0 (0%)       | 0 (0%)       | 117 |

Supplemental material is neither peer-reviewed nor thoroughly edited by CJASN. The authors alone are responsible for the accuracy and presentation of the material.

|   |   |     |   |   |   |     |   |   |     |   |   |     |        |           |              |              |     |
|---|---|-----|---|---|---|-----|---|---|-----|---|---|-----|--------|-----------|--------------|--------------|-----|
| 1 | 1 | _B5 | 0 | . | 1 | _E5 | 0 | 1 | _G4 | 0 | 1 | _I5 | 0 (0%) | 0 (0%)    | 147 (100%)   | 0 (0%)       | 147 |
| 1 | 1 | _B5 | 0 | . | 1 | _E5 | 1 | 1 | _G3 | 1 | 1 | _I5 | 0 (0%) | 0 (0%)    | 34 (100%)    | 0 (0%)       | 34  |
| 1 | 1 | _B5 | 0 | . | 1 | _E5 | 1 | 1 | _G3 | 1 | 1 | _I6 | 0 (0%) | 0 (0%)    | 41 (83.673%) | 8 (16.327%)  | 49  |
| 1 | 1 | _B5 | 0 | . | 1 | _E5 | 1 | 1 | _G4 | 1 | 1 | _I5 | 0 (0%) | 0 (0%)    | 49 (100%)    | 0 (0%)       | 49  |
| 1 | 1 | _B5 | 0 | . | 1 | _E5 | 1 | 1 | _G4 | 1 | 1 | _I6 | 0 (0%) | 0 (0%)    | 1 (2.564%)   | 38 (97.436%) | 39  |
| 1 | 1 | _B5 | 0 | 0 | 0 | _E3 | 0 | 0 | _G4 | 1 | 0 | _I5 | 0 (0%) | 42 (100%) | 0 (0%)       | 0 (0%)       | 42  |
| 1 | 1 | _B5 | 0 | 0 | 0 | _E3 | 0 | 0 | _G4 | 1 | 1 | _I6 | 0 (0%) | 0 (0%)    | 42 (100%)    | 0 (0%)       | 42  |
| 1 | 1 | _B5 | 0 | 0 | 0 | _E3 | 0 | 1 | _G3 | . | 0 | _I5 | 0 (0%) | 37 (100%) | 0 (0%)       | 0 (0%)       | 37  |
| 1 | 1 | _B5 | 0 | 0 | 0 | _E3 | 0 | 1 | _G3 | . | 0 | _I6 | 0 (0%) | 42 (100%) | 0 (0%)       | 0 (0%)       | 42  |
| 1 | 1 | _B5 | 0 | 0 | 0 | _E3 | 0 | 1 | _G3 | 0 | 0 | _I6 | 0 (0%) | 42 (100%) | 0 (0%)       | 0 (0%)       | 42  |
| 1 | 1 | _B5 | 0 | 0 | 0 | _E3 | 0 | 1 | _G3 | 0 | 1 | _I5 | 0 (0%) | 0 (0%)    | 37 (100%)    | 0 (0%)       | 37  |
| 1 | 1 | _B5 | 0 | 0 | 0 | _E3 | 0 | 1 | _G3 | 1 | 0 | _I5 | 0 (0%) | 37 (100%) | 0 (0%)       | 0 (0%)       | 37  |
| 1 | 1 | _B5 | 0 | 0 | 0 | _E3 | 0 | 1 | _G3 | 1 | 1 | _I6 | 0 (0%) | 0 (0%)    | 42 (100%)    | 0 (0%)       | 42  |
| 1 | 1 | _B5 | 0 | 0 | 0 | _E3 | 0 | 1 | _G4 | . | 0 | _I5 | 0 (0%) | 42 (100%) | 0 (0%)       | 0 (0%)       | 42  |
| 1 | 1 | _B5 | 0 | 0 | 0 | _E3 | 0 | 1 | _G4 | . | 0 | _I6 | 0 (0%) | 42 (100%) | 0 (0%)       | 0 (0%)       | 42  |
| 1 | 1 | _B5 | 0 | 0 | 0 | _E3 | 0 | 1 | _G4 | 0 | 0 | _I6 | 0 (0%) | 42 (100%) | 0 (0%)       | 0 (0%)       | 42  |
| 1 | 1 | _B5 | 0 | 0 | 0 | _E3 | 0 | 1 | _G4 | 0 | 1 | _I5 | 0 (0%) | 0 (0%)    | 42 (100%)    | 0 (0%)       | 42  |
| 1 | 1 | _B5 | 0 | 0 | 0 | _E4 | 0 | 0 | _G4 | 1 | 0 | _I5 | 0 (0%) | 36 (100%) | 0 (0%)       | 0 (0%)       | 36  |
| 1 | 1 | _B5 | 0 | 0 | 0 | _E4 | 0 | 0 | _G4 | 1 | 1 | _I6 | 0 (0%) | 0 (0%)    | 47 (100%)    | 0 (0%)       | 47  |
| 1 | 1 | _B5 | 0 | 0 | 0 | _E4 | 0 | 1 | _G3 | . | 0 | _I5 | 0 (0%) | 90 (100%) | 0 (0%)       | 0 (0%)       | 90  |
| 1 | 1 | _B5 | 0 | 0 | 0 | _E4 | 0 | 1 | _G3 | . | 0 | _I6 | 0 (0%) | 89 (100%) | 0 (0%)       | 0 (0%)       | 89  |

*Supplemental material is neither peer-reviewed nor thoroughly edited by CJASN. The authors alone are responsible for the accuracy and presentation of the material.*

|   |   |     |   |   |   |     |   |   |     |   |   |     |        |            |            |        |     |
|---|---|-----|---|---|---|-----|---|---|-----|---|---|-----|--------|------------|------------|--------|-----|
| 1 | 1 | _B5 | 0 | 0 | 0 | _E4 | 0 | 1 | _G3 | . | 1 | _I5 | 0 (0%) | 0 (0%)     | 31 (100%)  | 0 (0%) | 31  |
| 1 | 1 | _B5 | 0 | 0 | 0 | _E4 | 0 | 1 | _G3 | . | 1 | _I6 | 0 (0%) | 0 (0%)     | 14 (100%)  | 0 (0%) | 14  |
| 1 | 1 | _B5 | 0 | 0 | 0 | _E4 | 0 | 1 | _G3 | 0 | 0 | _I6 | 0 (0%) | 217 (100%) | 0 (0%)     | 0 (0%) | 217 |
| 1 | 1 | _B5 | 0 | 0 | 0 | _E4 | 0 | 1 | _G3 | 0 | 1 | _I5 | 0 (0%) | 0 (0%)     | 253 (100%) | 0 (0%) | 253 |
| 1 | 1 | _B5 | 0 | 0 | 0 | _E4 | 0 | 1 | _G3 | 1 | 0 | _I5 | 0 (0%) | 45 (100%)  | 0 (0%)     | 0 (0%) | 45  |
| 1 | 1 | _B5 | 0 | 0 | 0 | _E4 | 0 | 1 | _G3 | 1 | 0 | _I6 | 0 (0%) | 12 (100%)  | 0 (0%)     | 0 (0%) | 12  |
| 1 | 1 | _B5 | 0 | 0 | 0 | _E4 | 0 | 1 | _G3 | 1 | 1 | _I5 | 0 (0%) | 0 (0%)     | 14 (100%)  | 0 (0%) | 14  |
| 1 | 1 | _B5 | 0 | 0 | 0 | _E4 | 0 | 1 | _G3 | 1 | 1 | _I6 | 0 (0%) | 0 (0%)     | 38 (100%)  | 0 (0%) | 38  |
| 1 | 1 | _B5 | 0 | 0 | 0 | _E4 | 0 | 1 | _G4 | . | 0 | _I5 | 0 (0%) | 72 (100%)  | 0 (0%)     | 0 (0%) | 72  |
| 1 | 1 | _B5 | 0 | 0 | 0 | _E4 | 0 | 1 | _G4 | . | 0 | _I6 | 0 (0%) | 109 (100%) | 0 (0%)     | 0 (0%) | 109 |
| 1 | 1 | _B5 | 0 | 0 | 0 | _E4 | 0 | 1 | _G4 | . | 1 | _I5 | 0 (0%) | 0 (0%)     | 25 (100%)  | 0 (0%) | 25  |
| 1 | 1 | _B5 | 0 | 0 | 0 | _E4 | 0 | 1 | _G4 | . | 1 | _I6 | 0 (0%) | 0 (0%)     | 14 (100%)  | 0 (0%) | 14  |
| 1 | 1 | _B5 | 0 | 0 | 0 | _E4 | 0 | 1 | _G4 | 0 | 0 | _I6 | 0 (0%) | 266 (100%) | 0 (0%)     | 0 (0%) | 266 |
| 1 | 1 | _B5 | 0 | 0 | 0 | _E4 | 0 | 1 | _G4 | 0 | 1 | _I5 | 0 (0%) | 0 (0%)     | 207 (100%) | 0 (0%) | 207 |
| 1 | 1 | _B5 | 0 | 0 | 0 | _E4 | 0 | 1 | _G4 | 1 | 0 | _I6 | 0 (0%) | 16 (100%)  | 0 (0%)     | 0 (0%) | 16  |
| 1 | 1 | _B5 | 0 | 0 | 0 | _E4 | 0 | 1 | _G4 | 1 | 1 | _I5 | 0 (0%) | 0 (0%)     | 14 (100%)  | 0 (0%) | 14  |
| 1 | 1 | _B5 | 0 | 0 | 0 | _E4 | 1 | 1 | _G3 | 0 | 0 | _I6 | 0 (0%) | 76 (100%)  | 0 (0%)     | 0 (0%) | 76  |
| 1 | 1 | _B5 | 0 | 0 | 0 | _E4 | 1 | 1 | _G3 | 0 | 1 | _I5 | 0 (0%) | 0 (0%)     | 90 (100%)  | 0 (0%) | 90  |
| 1 | 1 | _B5 | 0 | 0 | 0 | _E4 | 1 | 1 | _G4 | 0 | 0 | _I6 | 0 (0%) | 94 (100%)  | 0 (0%)     | 0 (0%) | 94  |
| 1 | 1 | _B5 | 0 | 0 | 0 | _E4 | 1 | 1 | _G4 | 0 | 1 | _I5 | 0 (0%) | 0 (0%)     | 72 (100%)  | 0 (0%) | 72  |
| 1 | 1 | _B5 | 0 | 0 | 0 | _E5 | 0 | 0 | _G4 | 1 | 0 | _I5 | 0 (0%) | 49 (100%)  | 0 (0%)     | 0 (0%) | 49  |

|   |   |     |   |   |   |     |   |   |     |   |   |     |        |               |              |            |     |
|---|---|-----|---|---|---|-----|---|---|-----|---|---|-----|--------|---------------|--------------|------------|-----|
| 1 | 1 | _B5 | 0 | 0 | 0 | _E5 | 0 | 0 | _G4 | 1 | 1 | _I6 | 0 (0%) | 0 (0%)        | 39 (100%)    | 0 (0%)     | 39  |
| 1 | 1 | _B5 | 0 | 0 | 0 | _E5 | 0 | 1 | _G3 | . | 0 | _I5 | 0 (0%) | 68 (100%)     | 0 (0%)       | 0 (0%)     | 68  |
| 1 | 1 | _B5 | 0 | 0 | 0 | _E5 | 0 | 1 | _G3 | . | 0 | _I6 | 0 (0%) | 116 (98.305%) | 2 (1.695%)   | 0 (0%)     | 118 |
| 1 | 1 | _B5 | 0 | 0 | 0 | _E5 | 0 | 1 | _G3 | . | 1 | _I5 | 0 (0%) | 0 (0%)        | 21 (100%)    | 0 (0%)     | 21  |
| 1 | 1 | _B5 | 0 | 0 | 0 | _E5 | 0 | 1 | _G3 | . | 1 | _I6 | 0 (0%) | 0 (0%)        | 20 (100%)    | 0 (0%)     | 20  |
| 1 | 1 | _B5 | 0 | 0 | 0 | _E5 | 0 | 1 | _G3 | 0 | 0 | _I6 | 0 (0%) | 272 (98.195%) | 5 (1.805%)   | 0 (0%)     | 277 |
| 1 | 1 | _B5 | 0 | 0 | 0 | _E5 | 0 | 1 | _G3 | 0 | 1 | _I5 | 0 (0%) | 0 (0%)        | 192 (100%)   | 0 (0%)     | 192 |
| 1 | 1 | _B5 | 0 | 0 | 0 | _E5 | 0 | 1 | _G3 | 1 | 0 | _I5 | 0 (0%) | 34 (100%)     | 0 (0%)       | 0 (0%)     | 34  |
| 1 | 1 | _B5 | 0 | 0 | 0 | _E5 | 0 | 1 | _G3 | 1 | 0 | _I6 | 0 (0%) | 15 (93.75%)   | 1 (6.25%)    | 0 (0%)     | 16  |
| 1 | 1 | _B5 | 0 | 0 | 0 | _E5 | 0 | 1 | _G3 | 1 | 1 | _I5 | 0 (0%) | 0 (0%)        | 10 (100%)    | 0 (0%)     | 10  |
| 1 | 1 | _B5 | 0 | 0 | 0 | _E5 | 0 | 1 | _G3 | 1 | 1 | _I6 | 0 (0%) | 0 (0%)        | 48 (97.959%) | 1 (2.041%) | 49  |
| 1 | 1 | _B5 | 0 | 0 | 0 | _E5 | 0 | 1 | _G4 | . | 0 | _I5 | 0 (0%) | 98 (100%)     | 0 (0%)       | 0 (0%)     | 98  |
| 1 | 1 | _B5 | 0 | 0 | 0 | _E5 | 0 | 1 | _G4 | . | 0 | _I6 | 0 (0%) | 90 (100%)     | 0 (0%)       | 0 (0%)     | 90  |
| 1 | 1 | _B5 | 0 | 0 | 0 | _E5 | 0 | 1 | _G4 | . | 1 | _I5 | 0 (0%) | 0 (0%)        | 32 (100%)    | 0 (0%)     | 32  |
| 1 | 1 | _B5 | 0 | 0 | 0 | _E5 | 0 | 1 | _G4 | . | 1 | _I6 | 0 (0%) | 0 (0%)        | 12 (100%)    | 0 (0%)     | 12  |
| 1 | 1 | _B5 | 0 | 0 | 0 | _E5 | 0 | 1 | _G4 | 0 | 0 | _I6 | 0 (0%) | 222 (100%)    | 0 (0%)       | 0 (0%)     | 222 |
| 1 | 1 | _B5 | 0 | 0 | 0 | _E5 | 0 | 1 | _G4 | 0 | 1 | _I5 | 0 (0%) | 0 (0%)        | 278 (100%)   | 0 (0%)     | 278 |
| 1 | 1 | _B5 | 0 | 0 | 0 | _E5 | 0 | 1 | _G4 | 1 | 0 | _I6 | 0 (0%) | 15 (100%)     | 0 (0%)       | 0 (0%)     | 15  |
| 1 | 1 | _B5 | 0 | 0 | 0 | _E5 | 0 | 1 | _G4 | 1 | 1 | _I5 | 0 (0%) | 0 (0%)        | 16 (100%)    | 0 (0%)     | 16  |
| 1 | 1 | _B5 | 0 | 0 | 0 | _E5 | 1 | 1 | _G3 | 0 | 0 | _I6 | 0 (0%) | 96 (97.959%)  | 2 (2.041%)   | 0 (0%)     | 98  |
| 1 | 1 | _B5 | 0 | 0 | 0 | _E5 | 1 | 1 | _G3 | 0 | 1 | _I5 | 0 (0%) | 0 (0%)        | 68 (100%)    | 0 (0%)     | 68  |

|   |   |     |   |   |   |     |   |   |     |   |   |     |        |            |            |        |     |
|---|---|-----|---|---|---|-----|---|---|-----|---|---|-----|--------|------------|------------|--------|-----|
| 1 | 1 | _B5 | 0 | 0 | 0 | _E5 | 1 | 1 | _G4 | 0 | 0 | _I6 | 0 (0%) | 78 (100%)  | 0 (0%)     | 0 (0%) | 78  |
| 1 | 1 | _B5 | 0 | 0 | 0 | _E5 | 1 | 1 | _G4 | 0 | 1 | _I5 | 0 (0%) | 0 (0%)     | 98 (100%)  | 0 (0%) | 98  |
| 1 | 1 | _B5 | 0 | 0 | 1 | _E3 | 0 | 1 | _G3 | . | 0 | _I5 | 0 (0%) | 37 (100%)  | 0 (0%)     | 0 (0%) | 37  |
| 1 | 1 | _B5 | 0 | 0 | 1 | _E3 | 0 | 1 | _G3 | . | 0 | _I6 | 0 (0%) | 378 (100%) | 0 (0%)     | 0 (0%) | 378 |
| 1 | 1 | _B5 | 0 | 0 | 1 | _E3 | 0 | 1 | _G3 | . | 1 | _I5 | 0 (0%) | 0 (0%)     | 333 (100%) | 0 (0%) | 333 |
| 1 | 1 | _B5 | 0 | 0 | 1 | _E3 | 0 | 1 | _G3 | . | 1 | _I6 | 0 (0%) | 0 (0%)     | 42 (100%)  | 0 (0%) | 42  |
| 1 | 1 | _B5 | 0 | 0 | 1 | _E3 | 0 | 1 | _G3 | 0 | 0 | _I5 | 0 (0%) | 37 (100%)  | 0 (0%)     | 0 (0%) | 37  |
| 1 | 1 | _B5 | 0 | 0 | 1 | _E3 | 0 | 1 | _G3 | 0 | 0 | _I6 | 0 (0%) | 966 (100%) | 0 (0%)     | 0 (0%) | 966 |
| 1 | 1 | _B5 | 0 | 0 | 1 | _E3 | 0 | 1 | _G3 | 0 | 1 | _I5 | 0 (0%) | 0 (0%)     | 814 (100%) | 0 (0%) | 814 |
| 1 | 1 | _B5 | 0 | 0 | 1 | _E3 | 0 | 1 | _G3 | 1 | 0 | _I6 | 0 (0%) | 84 (100%)  | 0 (0%)     | 0 (0%) | 84  |
| 1 | 1 | _B5 | 0 | 0 | 1 | _E3 | 0 | 1 | _G3 | 1 | 1 | _I5 | 0 (0%) | 0 (0%)     | 148 (100%) | 0 (0%) | 148 |
| 1 | 1 | _B5 | 0 | 0 | 1 | _E3 | 0 | 1 | _G3 | 1 | 1 | _I6 | 0 (0%) | 0 (0%)     | 84 (100%)  | 0 (0%) | 84  |
| 1 | 1 | _B5 | 0 | 0 | 1 | _E3 | 0 | 1 | _G4 | . | 0 | _I5 | 0 (0%) | 0 (0%)     | 42 (100%)  | 0 (0%) | 42  |
| 1 | 1 | _B5 | 0 | 0 | 1 | _E3 | 0 | 1 | _G4 | . | 0 | _I6 | 0 (0%) | 378 (100%) | 0 (0%)     | 0 (0%) | 378 |
| 1 | 1 | _B5 | 0 | 0 | 1 | _E3 | 0 | 1 | _G4 | . | 1 | _I5 | 0 (0%) | 0 (0%)     | 378 (100%) | 0 (0%) | 378 |
| 1 | 1 | _B5 | 0 | 0 | 1 | _E3 | 0 | 1 | _G4 | . | 1 | _I6 | 0 (0%) | 0 (0%)     | 42 (100%)  | 0 (0%) | 42  |
| 1 | 1 | _B5 | 0 | 0 | 1 | _E3 | 0 | 1 | _G4 | 0 | 0 | _I5 | 0 (0%) | 0 (0%)     | 42 (100%)  | 0 (0%) | 42  |
| 1 | 1 | _B5 | 0 | 0 | 1 | _E3 | 0 | 1 | _G4 | 0 | 0 | _I6 | 0 (0%) | 966 (100%) | 0 (0%)     | 0 (0%) | 966 |
| 1 | 1 | _B5 | 0 | 0 | 1 | _E3 | 0 | 1 | _G4 | 0 | 1 | _I5 | 0 (0%) | 0 (0%)     | 924 (100%) | 0 (0%) | 924 |
| 1 | 1 | _B5 | 0 | 0 | 1 | _E3 | 0 | 1 | _G4 | 1 | 0 | _I6 | 0 (0%) | 84 (100%)  | 0 (0%)     | 0 (0%) | 84  |
| 1 | 1 | _B5 | 0 | 0 | 1 | _E3 | 0 | 1 | _G4 | 1 | 1 | _I5 | 0 (0%) | 0 (0%)     | 168 (100%) | 0 (0%) | 168 |

Supplemental material is neither peer-reviewed nor thoroughly edited by CJASN. The authors alone are responsible for the accuracy and presentation of the material.

|   |   |     |   |   |   |     |   |   |     |   |   |     |        |              |              |           |     |
|---|---|-----|---|---|---|-----|---|---|-----|---|---|-----|--------|--------------|--------------|-----------|-----|
| 1 | 1 | _B5 | 0 | 0 | 1 | _E3 | 0 | 1 | _G4 | 1 | 1 | _I6 | 0 (0%) | 0 (0%)       | 84 (100%)    | 0 (0%)    | 84  |
| 1 | 1 | _B5 | 0 | 0 | 1 | _E3 | 1 | 1 | _G3 | 0 | 0 | _I6 | 0 (0%) | 336 (100%)   | 0 (0%)       | 0 (0%)    | 336 |
| 1 | 1 | _B5 | 0 | 0 | 1 | _E3 | 1 | 1 | _G3 | 0 | 1 | _I5 | 0 (0%) | 0 (0%)       | 296 (100%)   | 0 (0%)    | 296 |
| 1 | 1 | _B5 | 0 | 0 | 1 | _E3 | 1 | 1 | _G3 | 1 | 1 | _I5 | 0 (0%) | 0 (0%)       | 37 (100%)    | 0 (0%)    | 37  |
| 1 | 1 | _B5 | 0 | 0 | 1 | _E3 | 1 | 1 | _G3 | 1 | 1 | _I6 | 0 (0%) | 0 (0%)       | 42 (100%)    | 0 (0%)    | 42  |
| 1 | 1 | _B5 | 0 | 0 | 1 | _E3 | 1 | 1 | _G4 | 0 | 0 | _I6 | 0 (0%) | 336 (100%)   | 0 (0%)       | 0 (0%)    | 336 |
| 1 | 1 | _B5 | 0 | 0 | 1 | _E3 | 1 | 1 | _G4 | 0 | 1 | _I5 | 0 (0%) | 0 (0%)       | 336 (100%)   | 0 (0%)    | 336 |
| 1 | 1 | _B5 | 0 | 0 | 1 | _E3 | 1 | 1 | _G4 | 1 | 1 | _I5 | 0 (0%) | 0 (0%)       | 42 (100%)    | 0 (0%)    | 42  |
| 1 | 1 | _B5 | 0 | 0 | 1 | _E3 | 1 | 1 | _G4 | 1 | 1 | _I6 | 0 (0%) | 0 (0%)       | 0 (0%)       | 42 (100%) | 42  |
| 1 | 1 | _B5 | 0 | 0 | 1 | _E4 | 0 | 1 | _G3 | . | 0 | _I6 | 0 (0%) | 291 (100%)   | 0 (0%)       | 0 (0%)    | 291 |
| 1 | 1 | _B5 | 0 | 0 | 1 | _E4 | 0 | 1 | _G3 | . | 1 | _I5 | 0 (0%) | 0 (0%)       | 374 (100%)   | 0 (0%)    | 374 |
| 1 | 1 | _B5 | 0 | 0 | 1 | _E4 | 0 | 1 | _G3 | . | 1 | _I6 | 0 (0%) | 0 (0%)       | 24 (100%)    | 0 (0%)    | 24  |
| 1 | 1 | _B5 | 0 | 0 | 1 | _E4 | 0 | 1 | _G3 | 0 | 0 | _I5 | 0 (0%) | 11 (24.444%) | 34 (75.556%) | 0 (0%)    | 45  |
| 1 | 1 | _B5 | 0 | 0 | 1 | _E4 | 0 | 1 | _G3 | 0 | 0 | _I6 | 0 (0%) | 695 (100%)   | 0 (0%)       | 0 (0%)    | 695 |
| 1 | 1 | _B5 | 0 | 0 | 1 | _E4 | 0 | 1 | _G3 | 0 | 1 | _I5 | 0 (0%) | 0 (0%)       | 782 (100%)   | 0 (0%)    | 782 |
| 1 | 1 | _B5 | 0 | 0 | 1 | _E4 | 0 | 1 | _G3 | 1 | 0 | _I6 | 0 (0%) | 64 (100%)    | 0 (0%)       | 0 (0%)    | 64  |
| 1 | 1 | _B5 | 0 | 0 | 1 | _E4 | 0 | 1 | _G3 | 1 | 1 | _I5 | 0 (0%) | 0 (0%)       | 166 (100%)   | 0 (0%)    | 166 |
| 1 | 1 | _B5 | 0 | 0 | 1 | _E4 | 0 | 1 | _G3 | 1 | 1 | _I6 | 0 (0%) | 0 (0%)       | 76 (100%)    | 0 (0%)    | 76  |
| 1 | 1 | _B5 | 0 | 0 | 1 | _E4 | 0 | 1 | _G4 | . | 0 | _I6 | 0 (0%) | 361 (100%)   | 0 (0%)       | 0 (0%)    | 361 |
| 1 | 1 | _B5 | 0 | 0 | 1 | _E4 | 0 | 1 | _G4 | . | 1 | _I5 | 0 (0%) | 0 (0%)       | 299 (100%)   | 0 (0%)    | 299 |
| 1 | 1 | _B5 | 0 | 0 | 1 | _E4 | 0 | 1 | _G4 | . | 1 | _I6 | 0 (0%) | 0 (0%)       | 33 (100%)    | 0 (0%)    | 33  |

*Supplemental material is neither peer-reviewed nor thoroughly edited by CJASN. The authors alone are responsible for the accuracy and presentation of the material.*

|   |   |     |   |   |   |     |   |   |     |   |   |     |        |               |              |              |     |
|---|---|-----|---|---|---|-----|---|---|-----|---|---|-----|--------|---------------|--------------|--------------|-----|
| 1 | 1 | _B5 | 0 | 0 | 1 | _E4 | 0 | 1 | _G4 | 0 | 0 | _I5 | 0 (0%) | 0 (0%)        | 36 (100%)    | 0 (0%)       | 36  |
| 1 | 1 | _B5 | 0 | 0 | 1 | _E4 | 0 | 1 | _G4 | 0 | 0 | _I6 | 0 (0%) | 862 (100%)    | 0 (0%)       | 0 (0%)       | 862 |
| 1 | 1 | _B5 | 0 | 0 | 1 | _E4 | 0 | 1 | _G4 | 0 | 1 | _I5 | 0 (0%) | 0 (0%)        | 621 (100%)   | 0 (0%)       | 621 |
| 1 | 1 | _B5 | 0 | 0 | 1 | _E4 | 0 | 1 | _G4 | 1 | 0 | _I6 | 0 (0%) | 78 (100%)     | 0 (0%)       | 0 (0%)       | 78  |
| 1 | 1 | _B5 | 0 | 0 | 1 | _E4 | 0 | 1 | _G4 | 1 | 1 | _I5 | 0 (0%) | 0 (0%)        | 130 (100%)   | 0 (0%)       | 130 |
| 1 | 1 | _B5 | 0 | 0 | 1 | _E4 | 0 | 1 | _G4 | 1 | 1 | _I6 | 0 (0%) | 0 (0%)        | 94 (100%)    | 0 (0%)       | 94  |
| 1 | 1 | _B5 | 0 | 0 | 1 | _E4 | 1 | 1 | _G3 | 0 | 0 | _I6 | 0 (0%) | 228 (100%)    | 0 (0%)       | 0 (0%)       | 228 |
| 1 | 1 | _B5 | 0 | 0 | 1 | _E4 | 1 | 1 | _G3 | 0 | 1 | _I5 | 0 (0%) | 0 (0%)        | 270 (100%)   | 0 (0%)       | 270 |
| 1 | 1 | _B5 | 0 | 0 | 1 | _E4 | 1 | 1 | _G3 | 1 | 1 | _I5 | 0 (0%) | 0 (0%)        | 45 (100%)    | 0 (0%)       | 45  |
| 1 | 1 | _B5 | 0 | 0 | 1 | _E4 | 1 | 1 | _G3 | 1 | 1 | _I6 | 0 (0%) | 0 (0%)        | 20 (52.632%) | 18 (47.368%) | 38  |
| 1 | 1 | _B5 | 0 | 0 | 1 | _E4 | 1 | 1 | _G4 | 0 | 0 | _I6 | 0 (0%) | 282 (100%)    | 0 (0%)       | 0 (0%)       | 282 |
| 1 | 1 | _B5 | 0 | 0 | 1 | _E4 | 1 | 1 | _G4 | 0 | 1 | _I5 | 0 (0%) | 0 (0%)        | 216 (100%)   | 0 (0%)       | 216 |
| 1 | 1 | _B5 | 0 | 0 | 1 | _E4 | 1 | 1 | _G4 | 1 | 1 | _I5 | 0 (0%) | 0 (0%)        | 36 (100%)    | 0 (0%)       | 36  |
| 1 | 1 | _B5 | 0 | 0 | 1 | _E4 | 1 | 1 | _G4 | 1 | 1 | _I6 | 0 (0%) | 0 (0%)        | 0 (0%)       | 47 (100%)    | 47  |
| 1 | 1 | _B5 | 0 | 0 | 1 | _E5 | 0 | 1 | _G3 | . | 0 | _I6 | 0 (0%) | 364 (97.849%) | 8 (2.151%)   | 0 (0%)       | 372 |
| 1 | 1 | _B5 | 0 | 0 | 1 | _E5 | 0 | 1 | _G3 | . | 1 | _I5 | 0 (0%) | 0 (0%)        | 285 (100%)   | 0 (0%)       | 285 |
| 1 | 1 | _B5 | 0 | 0 | 1 | _E5 | 0 | 1 | _G3 | . | 1 | _I6 | 0 (0%) | 0 (0%)        | 28 (96.552%) | 1 (3.448%)   | 29  |
| 1 | 1 | _B5 | 0 | 0 | 1 | _E5 | 0 | 1 | _G3 | 0 | 0 | _I5 | 0 (0%) | 7 (20.588%)   | 27 (79.412%) | 0 (0%)       | 34  |
| 1 | 1 | _B5 | 0 | 0 | 1 | _E5 | 0 | 1 | _G3 | 0 | 0 | _I6 | 0 (0%) | 880 (97.887%) | 19 (2.113%)  | 0 (0%)       | 899 |
| 1 | 1 | _B5 | 0 | 0 | 1 | _E5 | 0 | 1 | _G3 | 0 | 1 | _I5 | 0 (0%) | 0 (0%)        | 590 (100%)   | 0 (0%)       | 590 |
| 1 | 1 | _B5 | 0 | 0 | 1 | _E5 | 0 | 1 | _G3 | 1 | 0 | _I6 | 0 (0%) | 81 (98.78%)   | 1 (1.22%)    | 0 (0%)       | 82  |

Supplemental material is neither peer-reviewed nor thoroughly edited by CJASN. The authors alone are responsible for the accuracy and presentation of the material.

|   |   |     |   |   |   |     |   |   |     |   |   |     |        |               |              |              |     |
|---|---|-----|---|---|---|-----|---|---|-----|---|---|-----|--------|---------------|--------------|--------------|-----|
| 1 | 1 | _B5 | 0 | 0 | 1 | _E5 | 0 | 1 | _G3 | 1 | 1 | _I5 | 0 (0%) | 0 (0%)        | 126 (100%)   | 0 (0%)       | 126 |
| 1 | 1 | _B5 | 0 | 0 | 1 | _E5 | 0 | 1 | _G3 | 1 | 1 | _I6 | 0 (0%) | 0 (0%)        | 96 (97.959%) | 2 (2.041%)   | 98  |
| 1 | 1 | _B5 | 0 | 0 | 1 | _E5 | 0 | 1 | _G4 | . | 0 | _I6 | 0 (0%) | 300 (100%)    | 0 (0%)       | 0 (0%)       | 300 |
| 1 | 1 | _B5 | 0 | 0 | 1 | _E5 | 0 | 1 | _G4 | . | 1 | _I5 | 0 (0%) | 0 (0%)        | 409 (100%)   | 0 (0%)       | 409 |
| 1 | 1 | _B5 | 0 | 0 | 1 | _E5 | 0 | 1 | _G4 | . | 1 | _I6 | 0 (0%) | 0 (0%)        | 27 (100%)    | 0 (0%)       | 27  |
| 1 | 1 | _B5 | 0 | 0 | 1 | _E5 | 0 | 1 | _G4 | 0 | 0 | _I5 | 0 (0%) | 0 (0%)        | 49 (100%)    | 0 (0%)       | 49  |
| 1 | 1 | _B5 | 0 | 0 | 1 | _E5 | 0 | 1 | _G4 | 0 | 0 | _I6 | 0 (0%) | 714 (100%)    | 0 (0%)       | 0 (0%)       | 714 |
| 1 | 1 | _B5 | 0 | 0 | 1 | _E5 | 0 | 1 | _G4 | 0 | 1 | _I5 | 0 (0%) | 0 (0%)        | 849 (100%)   | 0 (0%)       | 849 |
| 1 | 1 | _B5 | 0 | 0 | 1 | _E5 | 0 | 1 | _G4 | 1 | 0 | _I6 | 0 (0%) | 63 (100%)     | 0 (0%)       | 0 (0%)       | 63  |
| 1 | 1 | _B5 | 0 | 0 | 1 | _E5 | 0 | 1 | _G4 | 1 | 1 | _I5 | 0 (0%) | 0 (0%)        | 180 (100%)   | 0 (0%)       | 180 |
| 1 | 1 | _B5 | 0 | 0 | 1 | _E5 | 0 | 1 | _G4 | 1 | 1 | _I6 | 0 (0%) | 0 (0%)        | 78 (100%)    | 0 (0%)       | 78  |
| 1 | 1 | _B5 | 0 | 0 | 1 | _E5 | 1 | 1 | _G3 | 0 | 0 | _I6 | 0 (0%) | 288 (97.959%) | 6 (2.041%)   | 0 (0%)       | 294 |
| 1 | 1 | _B5 | 0 | 0 | 1 | _E5 | 1 | 1 | _G3 | 0 | 1 | _I5 | 0 (0%) | 0 (0%)        | 204 (100%)   | 0 (0%)       | 204 |
| 1 | 1 | _B5 | 0 | 0 | 1 | _E5 | 1 | 1 | _G3 | 1 | 1 | _I5 | 0 (0%) | 0 (0%)        | 34 (100%)    | 0 (0%)       | 34  |
| 1 | 1 | _B5 | 0 | 0 | 1 | _E5 | 1 | 1 | _G3 | 1 | 1 | _I6 | 0 (0%) | 0 (0%)        | 26 (53.061%) | 23 (46.939%) | 49  |
| 1 | 1 | _B5 | 0 | 0 | 1 | _E5 | 1 | 1 | _G4 | 0 | 0 | _I6 | 0 (0%) | 234 (100%)    | 0 (0%)       | 0 (0%)       | 234 |
| 1 | 1 | _B5 | 0 | 0 | 1 | _E5 | 1 | 1 | _G4 | 0 | 1 | _I5 | 0 (0%) | 0 (0%)        | 294 (100%)   | 0 (0%)       | 294 |
| 1 | 1 | _B5 | 0 | 0 | 1 | _E5 | 1 | 1 | _G4 | 1 | 1 | _I5 | 0 (0%) | 0 (0%)        | 49 (100%)    | 0 (0%)       | 49  |
| 1 | 1 | _B5 | 0 | 0 | 1 | _E5 | 1 | 1 | _G4 | 1 | 1 | _I6 | 0 (0%) | 0 (0%)        | 0 (0%)       | 39 (100%)    | 39  |
| 1 | 1 | _B5 | 0 | 1 | 0 | _E4 | 0 | 1 | _G3 | 0 | 0 | _I6 | 0 (0%) | 13 (100%)     | 0 (0%)       | 0 (0%)       | 13  |
| 1 | 1 | _B5 | 0 | 1 | 0 | _E4 | 0 | 1 | _G3 | 0 | 1 | _I5 | 0 (0%) | 0 (0%)        | 17 (100%)    | 0 (0%)       | 17  |

|   |   |     |   |   |   |     |   |   |     |   |   |     |        |                 |               |        |     |
|---|---|-----|---|---|---|-----|---|---|-----|---|---|-----|--------|-----------------|---------------|--------|-----|
| 1 | 1 | _B5 | 0 | 1 | 0 | _E4 | 0 | 1 | _G4 | 0 | 0 | _I6 | 0 (0%) | 12 (100%)       | 0 (0%)        | 0 (0%) | 12  |
| 1 | 1 | _B5 | 0 | 1 | 0 | _E4 | 0 | 1 | _G4 | 0 | 1 | _I5 | 0 (0%) | 0 (0%)          | 12 (100%)     | 0 (0%) | 12  |
| 1 | 1 | _B5 | 0 | 1 | 0 | _E4 | 1 | 1 | _G3 | 0 | 0 | _I6 | 0 (0%) | 38 (100%)       | 0 (0%)        | 0 (0%) | 38  |
| 1 | 1 | _B5 | 0 | 1 | 0 | _E4 | 1 | 1 | _G3 | 0 | 1 | _I5 | 0 (0%) | 0 (0%)          | 45 (100%)     | 0 (0%) | 45  |
| 1 | 1 | _B5 | 0 | 1 | 0 | _E4 | 1 | 1 | _G4 | 0 | 0 | _I6 | 0 (0%) | 47 (100%)       | 0 (0%)        | 0 (0%) | 47  |
| 1 | 1 | _B5 | 0 | 1 | 0 | _E4 | 1 | 1 | _G4 | 0 | 1 | _I5 | 0 (0%) | 0 (0%)          | 36 (100%)     | 0 (0%) | 36  |
| 1 | 1 | _B5 | 0 | 1 | 0 | _E5 | 0 | 1 | _G3 | 0 | 0 | _I6 | 0 (0%) | 17<br>(94.444%) | 1<br>(5.556%) | 0 (0%) | 18  |
| 1 | 1 | _B5 | 0 | 1 | 0 | _E5 | 0 | 1 | _G3 | 0 | 1 | _I5 | 0 (0%) | 0 (0%)          | 15 (100%)     | 0 (0%) | 15  |
| 1 | 1 | _B5 | 0 | 1 | 0 | _E5 | 0 | 1 | _G4 | 0 | 0 | _I6 | 0 (0%) | 14 (100%)       | 0 (0%)        | 0 (0%) | 14  |
| 1 | 1 | _B5 | 0 | 1 | 0 | _E5 | 0 | 1 | _G4 | 0 | 1 | _I5 | 0 (0%) | 0 (0%)          | 11 (100%)     | 0 (0%) | 11  |
| 1 | 1 | _B5 | 0 | 1 | 0 | _E5 | 1 | 1 | _G3 | 0 | 0 | _I6 | 0 (0%) | 48<br>(97.959%) | 1<br>(2.041%) | 0 (0%) | 49  |
| 1 | 1 | _B5 | 0 | 1 | 0 | _E5 | 1 | 1 | _G3 | 0 | 1 | _I5 | 0 (0%) | 0 (0%)          | 34 (100%)     | 0 (0%) | 34  |
| 1 | 1 | _B5 | 0 | 1 | 0 | _E5 | 1 | 1 | _G4 | 0 | 0 | _I6 | 0 (0%) | 39 (100%)       | 0 (0%)        | 0 (0%) | 39  |
| 1 | 1 | _B5 | 0 | 1 | 0 | _E5 | 1 | 1 | _G4 | 0 | 1 | _I5 | 0 (0%) | 0 (0%)          | 49 (100%)     | 0 (0%) | 49  |
| 1 | 1 | _B5 | 0 | 1 | 1 | _E3 | 0 | 1 | _G3 | . | 0 | _I6 | 0 (0%) | 84 (100%)       | 0 (0%)        | 0 (0%) | 84  |
| 1 | 1 | _B5 | 0 | 1 | 1 | _E3 | 0 | 1 | _G3 | . | 1 | _I5 | 0 (0%) | 0 (0%)          | 74 (100%)     | 0 (0%) | 74  |
| 1 | 1 | _B5 | 0 | 1 | 1 | _E3 | 0 | 1 | _G3 | 0 | 0 | _I6 | 0 (0%) | 210<br>(100%)   | 0 (0%)        | 0 (0%) | 210 |
| 1 | 1 | _B5 | 0 | 1 | 1 | _E3 | 0 | 1 | _G3 | 0 | 1 | _I5 | 0 (0%) | 0 (0%)          | 185<br>(100%) | 0 (0%) | 185 |
| 1 | 1 | _B5 | 0 | 1 | 1 | _E3 | 0 | 1 | _G3 | 1 | 0 | _I6 | 0 (0%) | 42 (100%)       | 0 (0%)        | 0 (0%) | 42  |
| 1 | 1 | _B5 | 0 | 1 | 1 | _E3 | 0 | 1 | _G3 | 1 | 1 | _I5 | 0 (0%) | 0 (0%)          | 37 (100%)     | 0 (0%) | 37  |
| 1 | 1 | _B5 | 0 | 1 | 1 | _E3 | 0 | 1 | _G4 | . | 0 | _I6 | 0 (0%) | 84 (100%)       | 0 (0%)        | 0 (0%) | 84  |

*Supplemental material is neither peer-reviewed nor thoroughly edited by CJASN. The authors alone are responsible for the accuracy and presentation of the material.*

|   |   |     |   |   |   |     |   |   |     |   |   |     |        |            |            |           |     |
|---|---|-----|---|---|---|-----|---|---|-----|---|---|-----|--------|------------|------------|-----------|-----|
| 1 | 1 | _B5 | 0 | 1 | 1 | _E3 | 0 | 1 | _G4 | . | 1 | _I5 | 0 (0%) | 0 (0%)     | 84 (100%)  | 0 (0%)    | 84  |
| 1 | 1 | _B5 | 0 | 1 | 1 | _E3 | 0 | 1 | _G4 | 0 | 0 | _I6 | 0 (0%) | 210 (100%) | 0 (0%)     | 0 (0%)    | 210 |
| 1 | 1 | _B5 | 0 | 1 | 1 | _E3 | 0 | 1 | _G4 | 0 | 1 | _I5 | 0 (0%) | 0 (0%)     | 210 (100%) | 0 (0%)    | 210 |
| 1 | 1 | _B5 | 0 | 1 | 1 | _E3 | 0 | 1 | _G4 | 1 | 0 | _I6 | 0 (0%) | 42 (100%)  | 0 (0%)     | 0 (0%)    | 42  |
| 1 | 1 | _B5 | 0 | 1 | 1 | _E3 | 0 | 1 | _G4 | 1 | 1 | _I5 | 0 (0%) | 0 (0%)     | 42 (100%)  | 0 (0%)    | 42  |
| 1 | 1 | _B5 | 0 | 1 | 1 | _E3 | 1 | 1 | _G3 | 0 | 0 | _I6 | 0 (0%) | 84 (100%)  | 0 (0%)     | 0 (0%)    | 84  |
| 1 | 1 | _B5 | 0 | 1 | 1 | _E3 | 1 | 1 | _G3 | 0 | 1 | _I5 | 0 (0%) | 0 (0%)     | 74 (100%)  | 0 (0%)    | 74  |
| 1 | 1 | _B5 | 0 | 1 | 1 | _E3 | 1 | 1 | _G3 | 1 | 1 | _I5 | 0 (0%) | 0 (0%)     | 37 (100%)  | 0 (0%)    | 37  |
| 1 | 1 | _B5 | 0 | 1 | 1 | _E3 | 1 | 1 | _G3 | 1 | 1 | _I6 | 0 (0%) | 0 (0%)     | 0 (0%)     | 42 (100%) | 42  |
| 1 | 1 | _B5 | 0 | 1 | 1 | _E3 | 1 | 1 | _G4 | 0 | 0 | _I6 | 0 (0%) | 84 (100%)  | 0 (0%)     | 0 (0%)    | 84  |
| 1 | 1 | _B5 | 0 | 1 | 1 | _E3 | 1 | 1 | _G4 | 0 | 1 | _I5 | 0 (0%) | 0 (0%)     | 84 (100%)  | 0 (0%)    | 84  |
| 1 | 1 | _B5 | 0 | 1 | 1 | _E3 | 1 | 1 | _G4 | 1 | 1 | _I5 | 0 (0%) | 0 (0%)     | 42 (100%)  | 0 (0%)    | 42  |
| 1 | 1 | _B5 | 0 | 1 | 1 | _E3 | 1 | 1 | _G4 | 1 | 1 | _I6 | 0 (0%) | 0 (0%)     | 0 (0%)     | 42 (100%) | 42  |
| 1 | 1 | _B5 | 0 | 1 | 1 | _E4 | 0 | 1 | _G3 | . | 0 | _I6 | 0 (0%) | 76 (100%)  | 0 (0%)     | 0 (0%)    | 76  |
| 1 | 1 | _B5 | 0 | 1 | 1 | _E4 | 0 | 1 | _G3 | . | 1 | _I5 | 0 (0%) | 0 (0%)     | 90 (100%)  | 0 (0%)    | 90  |
| 1 | 1 | _B5 | 0 | 1 | 1 | _E4 | 0 | 1 | _G3 | 0 | 0 | _I6 | 0 (0%) | 177 (100%) | 0 (0%)     | 0 (0%)    | 177 |
| 1 | 1 | _B5 | 0 | 1 | 1 | _E4 | 0 | 1 | _G3 | 0 | 1 | _I5 | 0 (0%) | 0 (0%)     | 208 (100%) | 0 (0%)    | 208 |
| 1 | 1 | _B5 | 0 | 1 | 1 | _E4 | 0 | 1 | _G3 | 1 | 0 | _I6 | 0 (0%) | 38 (100%)  | 0 (0%)     | 0 (0%)    | 38  |
| 1 | 1 | _B5 | 0 | 1 | 1 | _E4 | 0 | 1 | _G3 | 1 | 1 | _I5 | 0 (0%) | 0 (0%)     | 45 (100%)  | 0 (0%)    | 45  |
| 1 | 1 | _B5 | 0 | 1 | 1 | _E4 | 0 | 1 | _G4 | . | 0 | _I6 | 0 (0%) | 94 (100%)  | 0 (0%)     | 0 (0%)    | 94  |
| 1 | 1 | _B5 | 0 | 1 | 1 | _E4 | 0 | 1 | _G4 | . | 1 | _I5 | 0 (0%) | 0 (0%)     | 72 (100%)  | 0 (0%)    | 72  |

*Supplemental material is neither peer-reviewed nor thoroughly edited by CJASN. The authors alone are responsible for the accuracy and presentation of the material.*

|   |   |     |   |   |   |     |   |   |     |   |   |     |        |                  |                 |                 |     |
|---|---|-----|---|---|---|-----|---|---|-----|---|---|-----|--------|------------------|-----------------|-----------------|-----|
| 1 | 1 | _B5 | 0 | 1 | 1 | _E4 | 0 | 1 | _G4 | 0 | 0 | _I6 | 0 (0%) | 223<br>(100%)    | 0 (0%)          | 0 (0%)          | 223 |
| 1 | 1 | _B5 | 0 | 1 | 1 | _E4 | 0 | 1 | _G4 | 0 | 1 | _I5 | 0 (0%) | 0 (0%)           | 168<br>(100%)   | 0 (0%)          | 168 |
| 1 | 1 | _B5 | 0 | 1 | 1 | _E4 | 0 | 1 | _G4 | 1 | 0 | _I6 | 0 (0%) | 47 (100%)        | 0 (0%)          | 0 (0%)          | 47  |
| 1 | 1 | _B5 | 0 | 1 | 1 | _E4 | 0 | 1 | _G4 | 1 | 1 | _I5 | 0 (0%) | 0 (0%)           | 36 (100%)       | 0 (0%)          | 36  |
| 1 | 1 | _B5 | 0 | 1 | 1 | _E4 | 1 | 1 | _G3 | 0 | 0 | _I6 | 0 (0%) | 38 (100%)        | 0 (0%)          | 0 (0%)          | 38  |
| 1 | 1 | _B5 | 0 | 1 | 1 | _E4 | 1 | 1 | _G3 | 0 | 1 | _I5 | 0 (0%) | 0 (0%)           | 45 (100%)       | 0 (0%)          | 45  |
| 1 | 1 | _B5 | 0 | 1 | 1 | _E4 | 1 | 1 | _G3 | 1 | 1 | _I5 | 0 (0%) | 0 (0%)           | 40<br>(88.889%) | 5<br>(11.111%)  | 45  |
| 1 | 1 | _B5 | 0 | 1 | 1 | _E4 | 1 | 1 | _G3 | 1 | 1 | _I6 | 0 (0%) | 0 (0%)           | 0 (0%)          | 38 (100%)       | 38  |
| 1 | 1 | _B5 | 0 | 1 | 1 | _E4 | 1 | 1 | _G4 | 0 | 0 | _I6 | 0 (0%) | 47 (100%)        | 0 (0%)          | 0 (0%)          | 47  |
| 1 | 1 | _B5 | 0 | 1 | 1 | _E4 | 1 | 1 | _G4 | 0 | 1 | _I5 | 0 (0%) | 0 (0%)           | 36 (100%)       | 0 (0%)          | 36  |
| 1 | 1 | _B5 | 0 | 1 | 1 | _E4 | 1 | 1 | _G4 | 1 | 1 | _I5 | 0 (0%) | 0 (0%)           | 26<br>(72.222%) | 10<br>(27.778%) | 36  |
| 1 | 1 | _B5 | 0 | 1 | 1 | _E4 | 1 | 1 | _G4 | 1 | 1 | _I6 | 0 (0%) | 0 (0%)           | 0 (0%)          | 47 (100%)       | 47  |
| 1 | 1 | _B5 | 0 | 1 | 1 | _E5 | 0 | 1 | _G3 | . | 0 | _I6 | 0 (0%) | 96<br>(97.959%)  | 2<br>(2.041%)   | 0 (0%)          | 98  |
| 1 | 1 | _B5 | 0 | 1 | 1 | _E5 | 0 | 1 | _G3 | . | 1 | _I5 | 0 (0%) | 0 (0%)           | 68 (100%)       | 0 (0%)          | 68  |
| 1 | 1 | _B5 | 0 | 1 | 1 | _E5 | 0 | 1 | _G3 | 0 | 0 | _I6 | 0 (0%) | 223<br>(98.238%) | 4<br>(1.762%)   | 0 (0%)          | 227 |
| 1 | 1 | _B5 | 0 | 1 | 1 | _E5 | 0 | 1 | _G3 | 0 | 1 | _I5 | 0 (0%) | 0 (0%)           | 155<br>(100%)   | 0 (0%)          | 155 |
| 1 | 1 | _B5 | 0 | 1 | 1 | _E5 | 0 | 1 | _G3 | 1 | 0 | _I6 | 0 (0%) | 48<br>(97.959%)  | 1<br>(2.041%)   | 0 (0%)          | 49  |
| 1 | 1 | _B5 | 0 | 1 | 1 | _E5 | 0 | 1 | _G3 | 1 | 1 | _I5 | 0 (0%) | 0 (0%)           | 34 (100%)       | 0 (0%)          | 34  |
| 1 | 1 | _B5 | 0 | 1 | 1 | _E5 | 0 | 1 | _G4 | . | 0 | _I6 | 0 (0%) | 78 (100%)        | 0 (0%)          | 0 (0%)          | 78  |
| 1 | 1 | _B5 | 0 | 1 | 1 | _E5 | 0 | 1 | _G4 | . | 1 | _I5 | 0 (0%) | 0 (0%)           | 98 (100%)       | 0 (0%)          | 98  |
| 1 | 1 | _B5 | 0 | 1 | 1 | _E5 | 0 | 1 | _G4 | 0 | 0 | _I6 | 0 (0%) | 181<br>(100%)    | 0 (0%)          | 0 (0%)          | 181 |

Supplemental material is neither peer-reviewed nor thoroughly edited by CJASN. The authors alone are responsible for the accuracy and presentation of the material.

|   |   |     |   |   |   |     |   |   |     |   |   |     |        |              |              |              |     |
|---|---|-----|---|---|---|-----|---|---|-----|---|---|-----|--------|--------------|--------------|--------------|-----|
| 1 | 1 | _B5 | 0 | 1 | 1 | _E5 | 0 | 1 | _G4 | 0 | 1 | _I5 | 0 (0%) | 0 (0%)       | 234 (100%)   | 0 (0%)       | 234 |
| 1 | 1 | _B5 | 0 | 1 | 1 | _E5 | 0 | 1 | _G4 | 1 | 0 | _I6 | 0 (0%) | 39 (100%)    | 0 (0%)       | 0 (0%)       | 39  |
| 1 | 1 | _B5 | 0 | 1 | 1 | _E5 | 0 | 1 | _G4 | 1 | 1 | _I5 | 0 (0%) | 0 (0%)       | 49 (100%)    | 0 (0%)       | 49  |
| 1 | 1 | _B5 | 0 | 1 | 1 | _E5 | 1 | 1 | _G3 | 0 | 0 | _I6 | 0 (0%) | 48 (97.959%) | 1 (2.041%)   | 0 (0%)       | 49  |
| 1 | 1 | _B5 | 0 | 1 | 1 | _E5 | 1 | 1 | _G3 | 0 | 1 | _I5 | 0 (0%) | 0 (0%)       | 34 (100%)    | 0 (0%)       | 34  |
| 1 | 1 | _B5 | 0 | 1 | 1 | _E5 | 1 | 1 | _G3 | 1 | 1 | _I5 | 0 (0%) | 0 (0%)       | 33 (97.059%) | 1 (2.941%)   | 34  |
| 1 | 1 | _B5 | 0 | 1 | 1 | _E5 | 1 | 1 | _G3 | 1 | 1 | _I6 | 0 (0%) | 0 (0%)       | 0 (0%)       | 49 (100%)    | 49  |
| 1 | 1 | _B5 | 0 | 1 | 1 | _E5 | 1 | 1 | _G4 | 0 | 0 | _I6 | 0 (0%) | 39 (100%)    | 0 (0%)       | 0 (0%)       | 39  |
| 1 | 1 | _B5 | 0 | 1 | 1 | _E5 | 1 | 1 | _G4 | 0 | 1 | _I5 | 0 (0%) | 0 (0%)       | 49 (100%)    | 0 (0%)       | 49  |
| 1 | 1 | _B5 | 0 | 1 | 1 | _E5 | 1 | 1 | _G4 | 1 | 1 | _I5 | 0 (0%) | 0 (0%)       | 35 (71.429%) | 14 (28.571%) | 49  |
| 1 | 1 | _B5 | 0 | 1 | 1 | _E5 | 1 | 1 | _G4 | 1 | 1 | _I6 | 0 (0%) | 0 (0%)       | 0 (0%)       | 39 (100%)    | 39  |
| 1 | 1 | _B5 | 1 | . | . | _E3 | 1 | . | _G3 | 1 | 1 | _I5 | 0 (0%) | 0 (0%)       | 0 (0%)       | 37 (100%)    | 37  |
| 1 | 1 | _B5 | 1 | . | . | _E3 | 1 | . | _G3 | 1 | 1 | _I6 | 0 (0%) | 0 (0%)       | 0 (0%)       | 42 (100%)    | 42  |
| 1 | 1 | _B5 | 1 | . | . | _E3 | 1 | . | _G4 | 1 | 1 | _I5 | 0 (0%) | 0 (0%)       | 0 (0%)       | 42 (100%)    | 42  |
| 1 | 1 | _B5 | 1 | . | . | _E3 | 1 | . | _G4 | 1 | 1 | _I6 | 0 (0%) | 0 (0%)       | 0 (0%)       | 42 (100%)    | 42  |
| 1 | 1 | _B5 | 1 | . | . | _E4 | 1 | . | _G3 | 1 | 1 | _I5 | 0 (0%) | 0 (0%)       | 0 (0%)       | 45 (100%)    | 45  |
| 1 | 1 | _B5 | 1 | . | . | _E4 | 1 | . | _G3 | 1 | 1 | _I6 | 0 (0%) | 0 (0%)       | 0 (0%)       | 38 (100%)    | 38  |
| 1 | 1 | _B5 | 1 | . | . | _E4 | 1 | . | _G4 | 1 | 1 | _I5 | 0 (0%) | 0 (0%)       | 0 (0%)       | 36 (100%)    | 36  |
| 1 | 1 | _B5 | 1 | . | . | _E4 | 1 | . | _G4 | 1 | 1 | _I6 | 0 (0%) | 0 (0%)       | 0 (0%)       | 47 (100%)    | 47  |
| 1 | 1 | _B5 | 1 | . | . | _E5 | 1 | . | _G3 | 1 | 1 | _I5 | 0 (0%) | 0 (0%)       | 0 (0%)       | 34 (100%)    | 34  |
| 1 | 1 | _B5 | 1 | . | . | _E5 | 1 | . | _G3 | 1 | 1 | _I6 | 0 (0%) | 0 (0%)       | 0 (0%)       | 49 (100%)    | 49  |

|   |   |     |   |   |   |     |   |   |     |   |   |     |        |        |                 |                |     |
|---|---|-----|---|---|---|-----|---|---|-----|---|---|-----|--------|--------|-----------------|----------------|-----|
| 1 | 1 | _B5 | 1 | . | . | _E5 | 1 | . | _G4 | 1 | 1 | _I5 | 0 (0%) | 0 (0%) | 0 (0%)          | 49 (100%)      | 49  |
| 1 | 1 | _B5 | 1 | . | . | _E5 | 1 | . | _G4 | 1 | 1 | _I6 | 0 (0%) | 0 (0%) | 0 (0%)          | 39 (100%)      | 39  |
| 1 | 1 | _B5 | 1 | . | 0 | _E4 | 1 | 1 | _G3 | 1 | 1 | _I5 | 0 (0%) | 0 (0%) | 0 (0%)          | 13 (100%)      | 13  |
| 1 | 1 | _B5 | 1 | . | 0 | _E4 | 1 | 1 | _G3 | 1 | 1 | _I6 | 0 (0%) | 0 (0%) | 13<br>(86.667%) | 2<br>(13.333%) | 15  |
| 1 | 1 | _B5 | 1 | . | 0 | _E4 | 1 | 1 | _G4 | 1 | 1 | _I6 | 0 (0%) | 0 (0%) | 0 (0%)          | 24 (100%)      | 24  |
| 1 | 1 | _B5 | 1 | . | 0 | _E5 | 1 | 1 | _G3 | 1 | 1 | _I5 | 0 (0%) | 0 (0%) | 0 (0%)          | 18 (100%)      | 18  |
| 1 | 1 | _B5 | 1 | . | 0 | _E5 | 1 | 1 | _G3 | 1 | 1 | _I6 | 0 (0%) | 0 (0%) | 10<br>(76.923%) | 3<br>(23.077%) | 13  |
| 1 | 1 | _B5 | 1 | . | 0 | _E5 | 1 | 1 | _G4 | 1 | 1 | _I5 | 0 (0%) | 0 (0%) | 0 (0%)          | 7 (100%)       | 7   |
| 1 | 1 | _B5 | 1 | . | 0 | _E5 | 1 | 1 | _G4 | 1 | 1 | _I6 | 0 (0%) | 0 (0%) | 0 (0%)          | 22 (100%)      | 22  |
| 1 | 1 | _B5 | 1 | . | 1 | _E3 | 0 | 1 | _G3 | 1 | 1 | _I5 | 0 (0%) | 0 (0%) | 0 (0%)          | 37 (100%)      | 37  |
| 1 | 1 | _B5 | 1 | . | 1 | _E3 | 0 | 1 | _G3 | 1 | 1 | _I6 | 0 (0%) | 0 (0%) | 42 (100%)       | 0 (0%)         | 42  |
| 1 | 1 | _B5 | 1 | . | 1 | _E3 | 0 | 1 | _G4 | 1 | 1 | _I5 | 0 (0%) | 0 (0%) | 0 (0%)          | 42 (100%)      | 42  |
| 1 | 1 | _B5 | 1 | . | 1 | _E3 | 0 | 1 | _G4 | 1 | 1 | _I6 | 0 (0%) | 0 (0%) | 42 (100%)       | 0 (0%)         | 42  |
| 1 | 1 | _B5 | 1 | . | 1 | _E3 | 1 | 1 | _G3 | . | 1 | _I5 | 0 (0%) | 0 (0%) | 0 (0%)          | 111<br>(100%)  | 111 |
| 1 | 1 | _B5 | 1 | . | 1 | _E3 | 1 | 1 | _G3 | . | 1 | _I6 | 0 (0%) | 0 (0%) | 0 (0%)          | 126<br>(100%)  | 126 |
| 1 | 1 | _B5 | 1 | . | 1 | _E3 | 1 | 1 | _G3 | 1 | 1 | _I5 | 0 (0%) | 0 (0%) | 0 (0%)          | 148<br>(100%)  | 148 |
| 1 | 1 | _B5 | 1 | . | 1 | _E3 | 1 | 1 | _G3 | 1 | 1 | _I6 | 0 (0%) | 0 (0%) | 0 (0%)          | 168<br>(100%)  | 168 |
| 1 | 1 | _B5 | 1 | . | 1 | _E3 | 1 | 1 | _G4 | . | 1 | _I5 | 0 (0%) | 0 (0%) | 0 (0%)          | 126<br>(100%)  | 126 |
| 1 | 1 | _B5 | 1 | . | 1 | _E3 | 1 | 1 | _G4 | . | 1 | _I6 | 0 (0%) | 0 (0%) | 0 (0%)          | 126<br>(100%)  | 126 |
| 1 | 1 | _B5 | 1 | . | 1 | _E3 | 1 | 1 | _G4 | 1 | 1 | _I5 | 0 (0%) | 0 (0%) | 0 (0%)          | 168<br>(100%)  | 168 |
| 1 | 1 | _B5 | 1 | . | 1 | _E3 | 1 | 1 | _G4 | 1 | 1 | _I6 | 0 (0%) | 0 (0%) | 0 (0%)          | 168<br>(100%)  | 168 |

|   |   |     |   |   |   |     |   |   |     |   |   |     |        |        |              |            |     |
|---|---|-----|---|---|---|-----|---|---|-----|---|---|-----|--------|--------|--------------|------------|-----|
| 1 | 1 | _B5 | 1 | . | 1 | _E4 | 0 | 1 | _G3 | 1 | 1 | _I5 | 0 (0%) | 0 (0%) | 0 (0%)       | 45 (100%)  | 45  |
| 1 | 1 | _B5 | 1 | . | 1 | _E4 | 0 | 1 | _G3 | 1 | 1 | _I6 | 0 (0%) | 0 (0%) | 38 (100%)    | 0 (0%)     | 38  |
| 1 | 1 | _B5 | 1 | . | 1 | _E4 | 0 | 1 | _G4 | 1 | 1 | _I5 | 0 (0%) | 0 (0%) | 0 (0%)       | 36 (100%)  | 36  |
| 1 | 1 | _B5 | 1 | . | 1 | _E4 | 0 | 1 | _G4 | 1 | 1 | _I6 | 0 (0%) | 0 (0%) | 46 (97.872%) | 1 (2.128%) | 47  |
| 1 | 1 | _B5 | 1 | . | 1 | _E4 | 1 | 1 | _G3 | . | 1 | _I5 | 0 (0%) | 0 (0%) | 0 (0%)       | 135 (100%) | 135 |
| 1 | 1 | _B5 | 1 | . | 1 | _E4 | 1 | 1 | _G3 | . | 1 | _I6 | 0 (0%) | 0 (0%) | 0 (0%)       | 114 (100%) | 114 |
| 1 | 1 | _B5 | 1 | . | 1 | _E4 | 1 | 1 | _G3 | 1 | 1 | _I5 | 0 (0%) | 0 (0%) | 0 (0%)       | 167 (100%) | 167 |
| 1 | 1 | _B5 | 1 | . | 1 | _E4 | 1 | 1 | _G3 | 1 | 1 | _I6 | 0 (0%) | 0 (0%) | 0 (0%)       | 137 (100%) | 137 |
| 1 | 1 | _B5 | 1 | . | 1 | _E4 | 1 | 1 | _G4 | . | 1 | _I5 | 0 (0%) | 0 (0%) | 0 (0%)       | 108 (100%) | 108 |
| 1 | 1 | _B5 | 1 | . | 1 | _E4 | 1 | 1 | _G4 | . | 1 | _I6 | 0 (0%) | 0 (0%) | 0 (0%)       | 141 (100%) | 141 |
| 1 | 1 | _B5 | 1 | . | 1 | _E4 | 1 | 1 | _G4 | 1 | 1 | _I5 | 0 (0%) | 0 (0%) | 0 (0%)       | 144 (100%) | 144 |
| 1 | 1 | _B5 | 1 | . | 1 | _E4 | 1 | 1 | _G4 | 1 | 1 | _I6 | 0 (0%) | 0 (0%) | 0 (0%)       | 164 (100%) | 164 |
| 1 | 1 | _B5 | 1 | . | 1 | _E5 | 0 | 1 | _G3 | 1 | 1 | _I5 | 0 (0%) | 0 (0%) | 0 (0%)       | 34 (100%)  | 34  |
| 1 | 1 | _B5 | 1 | . | 1 | _E5 | 0 | 1 | _G3 | 1 | 1 | _I6 | 0 (0%) | 0 (0%) | 48 (97.959%) | 1 (2.041%) | 49  |
| 1 | 1 | _B5 | 1 | . | 1 | _E5 | 0 | 1 | _G4 | 1 | 1 | _I5 | 0 (0%) | 0 (0%) | 0 (0%)       | 49 (100%)  | 49  |
| 1 | 1 | _B5 | 1 | . | 1 | _E5 | 0 | 1 | _G4 | 1 | 1 | _I6 | 0 (0%) | 0 (0%) | 39 (100%)    | 0 (0%)     | 39  |
| 1 | 1 | _B5 | 1 | . | 1 | _E5 | 1 | 1 | _G3 | . | 1 | _I5 | 0 (0%) | 0 (0%) | 0 (0%)       | 102 (100%) | 102 |
| 1 | 1 | _B5 | 1 | . | 1 | _E5 | 1 | 1 | _G3 | . | 1 | _I6 | 0 (0%) | 0 (0%) | 0 (0%)       | 147 (100%) | 147 |
| 1 | 1 | _B5 | 1 | . | 1 | _E5 | 1 | 1 | _G3 | 1 | 1 | _I5 | 0 (0%) | 0 (0%) | 0 (0%)       | 118 (100%) | 118 |
| 1 | 1 | _B5 | 1 | . | 1 | _E5 | 1 | 1 | _G3 | 1 | 1 | _I6 | 0 (0%) | 0 (0%) | 0 (0%)       | 183 (100%) | 183 |
| 1 | 1 | _B5 | 1 | . | 1 | _E5 | 1 | 1 | _G4 | . | 1 | _I5 | 0 (0%) | 0 (0%) | 0 (0%)       | 147 (100%) | 147 |

|   |   |     |   |   |   |     |   |   |     |   |   |     |        |           |            |            |     |
|---|---|-----|---|---|---|-----|---|---|-----|---|---|-----|--------|-----------|------------|------------|-----|
| 1 | 1 | _B5 | 1 | . | 1 | _E5 | 1 | 1 | _G4 | . | 1 | _I6 | 0 (0%) | 0 (0%)    | 0 (0%)     | 117 (100%) | 117 |
| 1 | 1 | _B5 | 1 | . | 1 | _E5 | 1 | 1 | _G4 | 1 | 1 | _I5 | 0 (0%) | 0 (0%)    | 0 (0%)     | 189 (100%) | 189 |
| 1 | 1 | _B5 | 1 | . | 1 | _E5 | 1 | 1 | _G4 | 1 | 1 | _I6 | 0 (0%) | 0 (0%)    | 0 (0%)     | 134 (100%) | 134 |
| 1 | 1 | _B5 | 1 | 0 | 0 | _E3 | 0 | 1 | _G3 | 1 | 0 | _I5 | 0 (0%) | 37 (100%) | 0 (0%)     | 0 (0%)     | 37  |
| 1 | 1 | _B5 | 1 | 0 | 0 | _E3 | 0 | 1 | _G3 | 1 | 1 | _I6 | 0 (0%) | 0 (0%)    | 42 (100%)  | 0 (0%)     | 42  |
| 1 | 1 | _B5 | 1 | 0 | 0 | _E3 | 0 | 1 | _G4 | 1 | 0 | _I5 | 0 (0%) | 0 (0%)    | 0 (0%)     | 42 (100%)  | 42  |
| 1 | 1 | _B5 | 1 | 0 | 0 | _E3 | 0 | 1 | _G4 | 1 | 1 | _I6 | 0 (0%) | 0 (0%)    | 42 (100%)  | 0 (0%)     | 42  |
| 1 | 1 | _B5 | 1 | 0 | 0 | _E3 | 1 | 1 | _G3 | 1 | 1 | _I5 | 0 (0%) | 0 (0%)    | 0 (0%)     | 74 (100%)  | 74  |
| 1 | 1 | _B5 | 1 | 0 | 0 | _E3 | 1 | 1 | _G3 | 1 | 1 | _I6 | 0 (0%) | 0 (0%)    | 84 (100%)  | 0 (0%)     | 84  |
| 1 | 1 | _B5 | 1 | 0 | 0 | _E3 | 1 | 1 | _G4 | 1 | 1 | _I5 | 0 (0%) | 0 (0%)    | 0 (0%)     | 84 (100%)  | 84  |
| 1 | 1 | _B5 | 1 | 0 | 0 | _E3 | 1 | 1 | _G4 | 1 | 1 | _I6 | 0 (0%) | 0 (0%)    | 0 (0%)     | 84 (100%)  | 84  |
| 1 | 1 | _B5 | 1 | 0 | 0 | _E4 | 0 | 1 | _G3 | 1 | 0 | _I5 | 0 (0%) | 45 (100%) | 0 (0%)     | 0 (0%)     | 45  |
| 1 | 1 | _B5 | 1 | 0 | 0 | _E4 | 0 | 1 | _G3 | 1 | 1 | _I5 | 0 (0%) | 0 (0%)    | 0 (0%)     | 58 (100%)  | 58  |
| 1 | 1 | _B5 | 1 | 0 | 0 | _E4 | 0 | 1 | _G3 | 1 | 1 | _I6 | 0 (0%) | 0 (0%)    | 87 (100%)  | 0 (0%)     | 87  |
| 1 | 1 | _B5 | 1 | 0 | 0 | _E4 | 0 | 1 | _G4 | 1 | 0 | _I5 | 0 (0%) | 36 (100%) | 0 (0%)     | 0 (0%)     | 36  |
| 1 | 1 | _B5 | 1 | 0 | 0 | _E4 | 0 | 1 | _G4 | 1 | 1 | _I5 | 0 (0%) | 0 (0%)    | 0 (0%)     | 46 (100%)  | 46  |
| 1 | 1 | _B5 | 1 | 0 | 0 | _E4 | 0 | 1 | _G4 | 1 | 1 | _I6 | 0 (0%) | 0 (0%)    | 107 (100%) | 0 (0%)     | 107 |
| 1 | 1 | _B5 | 1 | 0 | 0 | _E4 | 1 | 1 | _G3 | . | 1 | _I5 | 0 (0%) | 0 (0%)    | 0 (0%)     | 12 (100%)  | 12  |
| 1 | 1 | _B5 | 1 | 0 | 0 | _E4 | 1 | 1 | _G3 | . | 1 | _I6 | 0 (0%) | 0 (0%)    | 14 (100%)  | 0 (0%)     | 14  |
| 1 | 1 | _B5 | 1 | 0 | 0 | _E4 | 1 | 1 | _G3 | 1 | 0 | _I5 | 0 (0%) | 0 (0%)    | 0 (0%)     | 45 (100%)  | 45  |
| 1 | 1 | _B5 | 1 | 0 | 0 | _E4 | 1 | 1 | _G3 | 1 | 1 | _I5 | 0 (0%) | 0 (0%)    | 0 (0%)     | 165 (100%) | 165 |

Supplemental material is neither peer-reviewed nor thoroughly edited by CJASN. The authors alone are responsible for the accuracy and presentation of the material.

|   |   |     |   |   |   |     |   |   |     |   |   |     |        |           |               |              |     |
|---|---|-----|---|---|---|-----|---|---|-----|---|---|-----|--------|-----------|---------------|--------------|-----|
| 1 | 1 | _B5 | 1 | 0 | 0 | _E4 | 1 | 1 | _G3 | 1 | 1 | _I6 | 0 (0%) | 0 (0%)    | 176 (100%)    | 0 (0%)       | 176 |
| 1 | 1 | _B5 | 1 | 0 | 0 | _E4 | 1 | 1 | _G4 | . | 1 | _I5 | 0 (0%) | 0 (0%)    | 0 (0%)        | 12 (100%)    | 12  |
| 1 | 1 | _B5 | 1 | 0 | 0 | _E4 | 1 | 1 | _G4 | . | 1 | _I6 | 0 (0%) | 0 (0%)    | 1 (5.882%)    | 16 (94.118%) | 17  |
| 1 | 1 | _B5 | 1 | 0 | 0 | _E4 | 1 | 1 | _G4 | 1 | 0 | _I5 | 0 (0%) | 0 (0%)    | 0 (0%)        | 36 (100%)    | 36  |
| 1 | 1 | _B5 | 1 | 0 | 0 | _E4 | 1 | 1 | _G4 | 1 | 1 | _I5 | 0 (0%) | 0 (0%)    | 0 (0%)        | 137 (100%)   | 137 |
| 1 | 1 | _B5 | 1 | 0 | 0 | _E4 | 1 | 1 | _G4 | 1 | 1 | _I6 | 0 (0%) | 0 (0%)    | 142 (65.138%) | 76 (34.862%) | 218 |
| 1 | 1 | _B5 | 1 | 0 | 0 | _E5 | 0 | 1 | _G3 | 1 | 0 | _I5 | 0 (0%) | 34 (100%) | 0 (0%)        | 0 (0%)       | 34  |
| 1 | 1 | _B5 | 1 | 0 | 0 | _E5 | 0 | 1 | _G3 | 1 | 1 | _I5 | 0 (0%) | 0 (0%)    | 0 (0%)        | 44 (100%)    | 44  |
| 1 | 1 | _B5 | 1 | 0 | 0 | _E5 | 0 | 1 | _G3 | 1 | 1 | _I6 | 0 (0%) | 0 (0%)    | 115 (98.291%) | 2 (1.709%)   | 117 |
| 1 | 1 | _B5 | 1 | 0 | 0 | _E5 | 0 | 1 | _G4 | 1 | 0 | _I5 | 0 (0%) | 49 (100%) | 0 (0%)        | 0 (0%)       | 49  |
| 1 | 1 | _B5 | 1 | 0 | 0 | _E5 | 0 | 1 | _G4 | 1 | 1 | _I5 | 0 (0%) | 0 (0%)    | 1 (1.538%)    | 64 (98.462%) | 65  |
| 1 | 1 | _B5 | 1 | 0 | 0 | _E5 | 0 | 1 | _G4 | 1 | 1 | _I6 | 0 (0%) | 0 (0%)    | 91 (100%)     | 0 (0%)       | 91  |
| 1 | 1 | _B5 | 1 | 0 | 0 | _E5 | 1 | 1 | _G3 | . | 1 | _I5 | 0 (0%) | 0 (0%)    | 0 (0%)        | 7 (100%)     | 7   |
| 1 | 1 | _B5 | 1 | 0 | 0 | _E5 | 1 | 1 | _G3 | . | 1 | _I6 | 0 (0%) | 0 (0%)    | 15 (100%)     | 0 (0%)       | 15  |
| 1 | 1 | _B5 | 1 | 0 | 0 | _E5 | 1 | 1 | _G3 | 1 | 0 | _I5 | 0 (0%) | 0 (0%)    | 0 (0%)        | 34 (100%)    | 34  |
| 1 | 1 | _B5 | 1 | 0 | 0 | _E5 | 1 | 1 | _G3 | 1 | 1 | _I5 | 0 (0%) | 0 (0%)    | 0 (0%)        | 132 (100%)   | 132 |
| 1 | 1 | _B5 | 1 | 0 | 0 | _E5 | 1 | 1 | _G3 | 1 | 1 | _I6 | 0 (0%) | 0 (0%)    | 226 (97.414%) | 6 (2.586%)   | 232 |
| 1 | 1 | _B5 | 1 | 0 | 0 | _E5 | 1 | 1 | _G4 | . | 1 | _I5 | 0 (0%) | 0 (0%)    | 0 (0%)        | 18 (100%)    | 18  |
| 1 | 1 | _B5 | 1 | 0 | 0 | _E5 | 1 | 1 | _G4 | . | 1 | _I6 | 0 (0%) | 0 (0%)    | 1 (6.25%)     | 15 (93.75%)  | 16  |
| 1 | 1 | _B5 | 1 | 0 | 0 | _E5 | 1 | 1 | _G4 | 1 | 0 | _I5 | 0 (0%) | 0 (0%)    | 0 (0%)        | 49 (100%)    | 49  |
| 1 | 1 | _B5 | 1 | 0 | 0 | _E5 | 1 | 1 | _G4 | 1 | 1 | _I5 | 0 (0%) | 0 (0%)    | 0 (0%)        | 181 (100%)   | 181 |

Supplemental material is neither peer-reviewed nor thoroughly edited by CJASN. The authors alone are responsible for the accuracy and presentation of the material.

|   |   |     |   |   |   |     |   |   |     |   |   |     |        |        |                 |                 |      |
|---|---|-----|---|---|---|-----|---|---|-----|---|---|-----|--------|--------|-----------------|-----------------|------|
| 1 | 1 | _B5 | 1 | 0 | 0 | _E5 | 1 | 1 | _G4 | 1 | 1 | _I6 | 0 (0%) | 0 (0%) | 96<br>(51.892%) | 89<br>(48.108%) | 185  |
| 1 | 1 | _B5 | 1 | 0 | 1 | _E3 | 0 | 1 | _G3 | 1 | 0 | _I5 | 0 (0%) | 0 (0%) | 0 (0%)          | 37 (100%)       | 37   |
| 1 | 1 | _B5 | 1 | 0 | 1 | _E3 | 0 | 1 | _G3 | 1 | 1 | _I5 | 0 (0%) | 0 (0%) | 0 (0%)          | 111<br>(100%)   | 111  |
| 1 | 1 | _B5 | 1 | 0 | 1 | _E3 | 0 | 1 | _G3 | 1 | 1 | _I6 | 0 (0%) | 0 (0%) | 168<br>(100%)   | 0 (0%)          | 168  |
| 1 | 1 | _B5 | 1 | 0 | 1 | _E3 | 0 | 1 | _G4 | 1 | 0 | _I5 | 0 (0%) | 0 (0%) | 0 (0%)          | 42 (100%)       | 42   |
| 1 | 1 | _B5 | 1 | 0 | 1 | _E3 | 0 | 1 | _G4 | 1 | 1 | _I5 | 0 (0%) | 0 (0%) | 0 (0%)          | 126<br>(100%)   | 126  |
| 1 | 1 | _B5 | 1 | 0 | 1 | _E3 | 0 | 1 | _G4 | 1 | 1 | _I6 | 0 (0%) | 0 (0%) | 168<br>(100%)   | 0 (0%)          | 168  |
| 1 | 1 | _B5 | 1 | 0 | 1 | _E3 | 1 | 1 | _G3 | . | 1 | _I5 | 0 (0%) | 0 (0%) | 0 (0%)          | 185<br>(100%)   | 185  |
| 1 | 1 | _B5 | 1 | 0 | 1 | _E3 | 1 | 1 | _G3 | . | 1 | _I6 | 0 (0%) | 0 (0%) | 0 (0%)          | 210<br>(100%)   | 210  |
| 1 | 1 | _B5 | 1 | 0 | 1 | _E3 | 1 | 1 | _G3 | 1 | 0 | _I5 | 0 (0%) | 0 (0%) | 0 (0%)          | 37 (100%)       | 37   |
| 1 | 1 | _B5 | 1 | 0 | 1 | _E3 | 1 | 1 | _G3 | 1 | 1 | _I5 | 0 (0%) | 0 (0%) | 0 (0%)          | 1480<br>(100%)  | 1480 |
| 1 | 1 | _B5 | 1 | 0 | 1 | _E3 | 1 | 1 | _G3 | 1 | 1 | _I6 | 0 (0%) | 0 (0%) | 0 (0%)          | 1722<br>(100%)  | 1722 |
| 1 | 1 | _B5 | 1 | 0 | 1 | _E3 | 1 | 1 | _G4 | . | 1 | _I5 | 0 (0%) | 0 (0%) | 0 (0%)          | 210<br>(100%)   | 210  |
| 1 | 1 | _B5 | 1 | 0 | 1 | _E3 | 1 | 1 | _G4 | . | 1 | _I6 | 0 (0%) | 0 (0%) | 0 (0%)          | 210<br>(100%)   | 210  |
| 1 | 1 | _B5 | 1 | 0 | 1 | _E3 | 1 | 1 | _G4 | 1 | 0 | _I5 | 0 (0%) | 0 (0%) | 0 (0%)          | 42 (100%)       | 42   |
| 1 | 1 | _B5 | 1 | 0 | 1 | _E3 | 1 | 1 | _G4 | 1 | 1 | _I5 | 0 (0%) | 0 (0%) | 0 (0%)          | 1680<br>(100%)  | 1680 |
| 1 | 1 | _B5 | 1 | 0 | 1 | _E3 | 1 | 1 | _G4 | 1 | 1 | _I6 | 0 (0%) | 0 (0%) | 0 (0%)          | 1722<br>(100%)  | 1722 |
| 1 | 1 | _B5 | 1 | 0 | 1 | _E4 | 0 | 1 | _G3 | 1 | 0 | _I5 | 0 (0%) | 0 (0%) | 0 (0%)          | 45 (100%)       | 45   |
| 1 | 1 | _B5 | 1 | 0 | 1 | _E4 | 0 | 1 | _G3 | 1 | 1 | _I5 | 0 (0%) | 0 (0%) | 0 (0%)          | 77 (100%)       | 77   |
| 1 | 1 | _B5 | 1 | 0 | 1 | _E4 | 0 | 1 | _G3 | 1 | 1 | _I6 | 0 (0%) | 0 (0%) | 103<br>(100%)   | 0 (0%)          | 103  |
| 1 | 1 | _B5 | 1 | 0 | 1 | _E4 | 0 | 1 | _G4 | 1 | 0 | _I5 | 0 (0%) | 0 (0%) | 0 (0%)          | 36 (100%)       | 36   |

|   |   |     |   |   |   |     |   |   |     |   |   |     |        |        |                  |                 |      |
|---|---|-----|---|---|---|-----|---|---|-----|---|---|-----|--------|--------|------------------|-----------------|------|
| 1 | 1 | _B5 | 1 | 0 | 1 | _E4 | 0 | 1 | _G4 | 1 | 1 | _I5 | 0 (0%) | 0 (0%) | 0 (0%)           | 62 (100%)       | 62   |
| 1 | 1 | _B5 | 1 | 0 | 1 | _E4 | 0 | 1 | _G4 | 1 | 1 | _I6 | 0 (0%) | 0 (0%) | 69<br>(53.906%)  | 59<br>(46.094%) | 128  |
| 1 | 1 | _B5 | 1 | 0 | 1 | _E4 | 1 | 1 | _G3 | . | 1 | _I5 | 0 (0%) | 0 (0%) | 0 (0%)           | 213<br>(100%)   | 213  |
| 1 | 1 | _B5 | 1 | 0 | 1 | _E4 | 1 | 1 | _G3 | . | 1 | _I6 | 0 (0%) | 0 (0%) | 0 (0%)           | 176<br>(100%)   | 176  |
| 1 | 1 | _B5 | 1 | 0 | 1 | _E4 | 1 | 1 | _G3 | 1 | 1 | _I5 | 0 (0%) | 0 (0%) | 0 (0%)           | 1725<br>(100%)  | 1725 |
| 1 | 1 | _B5 | 1 | 0 | 1 | _E4 | 1 | 1 | _G3 | 1 | 1 | _I6 | 0 (0%) | 0 (0%) | 0 (0%)           | 1458<br>(100%)  | 1458 |
| 1 | 1 | _B5 | 1 | 0 | 1 | _E4 | 1 | 1 | _G4 | . | 1 | _I5 | 0 (0%) | 0 (0%) | 0 (0%)           | 168<br>(100%)   | 168  |
| 1 | 1 | _B5 | 1 | 0 | 1 | _E4 | 1 | 1 | _G4 | . | 1 | _I6 | 0 (0%) | 0 (0%) | 0 (0%)           | 218<br>(100%)   | 218  |
| 1 | 1 | _B5 | 1 | 0 | 1 | _E4 | 1 | 1 | _G4 | 1 | 1 | _I5 | 0 (0%) | 0 (0%) | 0 (0%)           | 1375<br>(100%)  | 1375 |
| 1 | 1 | _B5 | 1 | 0 | 1 | _E4 | 1 | 1 | _G4 | 1 | 1 | _I6 | 0 (0%) | 0 (0%) | 0 (0%)           | 1803<br>(100%)  | 1803 |
| 1 | 1 | _B5 | 1 | 0 | 1 | _E5 | 0 | 1 | _G3 | 1 | 0 | _I5 | 0 (0%) | 0 (0%) | 0 (0%)           | 34 (100%)       | 34   |
| 1 | 1 | _B5 | 1 | 0 | 1 | _E5 | 0 | 1 | _G3 | 1 | 1 | _I5 | 0 (0%) | 0 (0%) | 0 (0%)           | 58 (100%)       | 58   |
| 1 | 1 | _B5 | 1 | 0 | 1 | _E5 | 0 | 1 | _G3 | 1 | 1 | _I6 | 0 (0%) | 0 (0%) | 124<br>(96.875%) | 4<br>(3.125%)   | 128  |
| 1 | 1 | _B5 | 1 | 0 | 1 | _E5 | 0 | 1 | _G4 | 1 | 0 | _I5 | 0 (0%) | 0 (0%) | 0 (0%)           | 49 (100%)       | 49   |
| 1 | 1 | _B5 | 1 | 0 | 1 | _E5 | 0 | 1 | _G4 | 1 | 1 | _I5 | 0 (0%) | 0 (0%) | 0 (0%)           | 82 (100%)       | 82   |
| 1 | 1 | _B5 | 1 | 0 | 1 | _E5 | 0 | 1 | _G4 | 1 | 1 | _I6 | 0 (0%) | 0 (0%) | 45<br>(43.269%)  | 59<br>(56.731%) | 104  |
| 1 | 1 | _B5 | 1 | 0 | 1 | _E5 | 1 | 1 | _G3 | . | 1 | _I5 | 0 (0%) | 0 (0%) | 0 (0%)           | 163<br>(100%)   | 163  |
| 1 | 1 | _B5 | 1 | 0 | 1 | _E5 | 1 | 1 | _G3 | . | 1 | _I6 | 0 (0%) | 0 (0%) | 0 (0%)           | 230<br>(100%)   | 230  |
| 1 | 1 | _B5 | 1 | 0 | 1 | _E5 | 1 | 1 | _G3 | 1 | 1 | _I5 | 0 (0%) | 0 (0%) | 0 (0%)           | 1296<br>(100%)  | 1296 |
| 1 | 1 | _B5 | 1 | 0 | 1 | _E5 | 1 | 1 | _G3 | 1 | 1 | _I6 | 0 (0%) | 0 (0%) | 0 (0%)           | 1875<br>(100%)  | 1875 |
| 1 | 1 | _B5 | 1 | 0 | 1 | _E5 | 1 | 1 | _G4 | . | 1 | _I5 | 0 (0%) | 0 (0%) | 0 (0%)           | 227<br>(100%)   | 227  |

Supplemental material is neither peer-reviewed nor thoroughly edited by CJASN. The authors alone are responsible for the accuracy and presentation of the material.

|   |   |     |   |   |   |     |   |   |     |   |   |     |        |                 |        |                 |      |
|---|---|-----|---|---|---|-----|---|---|-----|---|---|-----|--------|-----------------|--------|-----------------|------|
| 1 | 1 | _B5 | 1 | 0 | 1 | _E5 | 1 | 1 | _G4 | . | 1 | _I6 | 0 (0%) | 0 (0%)          | 0 (0%) | 179<br>(100%)   | 179  |
| 1 | 1 | _B5 | 1 | 0 | 1 | _E5 | 1 | 1 | _G4 | 1 | 1 | _I5 | 0 (0%) | 0 (0%)          | 0 (0%) | 1877<br>(100%)  | 1877 |
| 1 | 1 | _B5 | 1 | 0 | 1 | _E5 | 1 | 1 | _G4 | 1 | 1 | _I6 | 0 (0%) | 0 (0%)          | 0 (0%) | 1492<br>(100%)  | 1492 |
| 1 | 1 | _B5 | 1 | 1 | 1 | _E3 | 1 | 1 | _G3 | . | 1 | _I5 | 0 (0%) | 0 (0%)          | 0 (0%) | 37 (100%)       | 37   |
| 1 | 1 | _B5 | 1 | 1 | 1 | _E3 | 1 | 1 | _G3 | . | 1 | _I6 | 0 (0%) | 0 (0%)          | 0 (0%) | 42 (100%)       | 42   |
| 1 | 1 | _B5 | 1 | 1 | 1 | _E3 | 1 | 1 | _G3 | 0 | 0 | _I6 | 0 (0%) | 42 (100%)       | 0 (0%) | 0 (0%)          | 42   |
| 1 | 1 | _B5 | 1 | 1 | 1 | _E3 | 1 | 1 | _G3 | 0 | 1 | _I5 | 0 (0%) | 0 (0%)          | 0 (0%) | 37 (100%)       | 37   |
| 1 | 1 | _B5 | 1 | 1 | 1 | _E3 | 1 | 1 | _G3 | 1 | 1 | _I5 | 0 (0%) | 0 (0%)          | 0 (0%) | 703<br>(100%)   | 703  |
| 1 | 1 | _B5 | 1 | 1 | 1 | _E3 | 1 | 1 | _G3 | 1 | 1 | _I6 | 0 (0%) | 0 (0%)          | 0 (0%) | 798<br>(100%)   | 798  |
| 1 | 1 | _B5 | 1 | 1 | 1 | _E3 | 1 | 1 | _G4 | . | 1 | _I5 | 0 (0%) | 0 (0%)          | 0 (0%) | 42 (100%)       | 42   |
| 1 | 1 | _B5 | 1 | 1 | 1 | _E3 | 1 | 1 | _G4 | . | 1 | _I6 | 0 (0%) | 0 (0%)          | 0 (0%) | 42 (100%)       | 42   |
| 1 | 1 | _B5 | 1 | 1 | 1 | _E3 | 1 | 1 | _G4 | 0 | 0 | _I6 | 0 (0%) | 42 (100%)       | 0 (0%) | 0 (0%)          | 42   |
| 1 | 1 | _B5 | 1 | 1 | 1 | _E3 | 1 | 1 | _G4 | 0 | 1 | _I5 | 0 (0%) | 0 (0%)          | 0 (0%) | 42 (100%)       | 42   |
| 1 | 1 | _B5 | 1 | 1 | 1 | _E3 | 1 | 1 | _G4 | 1 | 1 | _I5 | 0 (0%) | 0 (0%)          | 0 (0%) | 798<br>(100%)   | 798  |
| 1 | 1 | _B5 | 1 | 1 | 1 | _E3 | 1 | 1 | _G4 | 1 | 1 | _I6 | 0 (0%) | 0 (0%)          | 0 (0%) | 798<br>(100%)   | 798  |
| 1 | 1 | _B5 | 1 | 1 | 1 | _E4 | 1 | 1 | _G3 | . | 1 | _I5 | 0 (0%) | 0 (0%)          | 0 (0%) | 45 (100%)       | 45   |
| 1 | 1 | _B5 | 1 | 1 | 1 | _E4 | 1 | 1 | _G3 | . | 1 | _I6 | 0 (0%) | 0 (0%)          | 0 (0%) | 38 (100%)       | 38   |
| 1 | 1 | _B5 | 1 | 1 | 1 | _E4 | 1 | 1 | _G3 | 0 | 0 | _I6 | 0 (0%) | 28<br>(73.684%) | 0 (0%) | 10<br>(26.316%) | 38   |
| 1 | 1 | _B5 | 1 | 1 | 1 | _E4 | 1 | 1 | _G3 | 0 | 1 | _I5 | 0 (0%) | 0 (0%)          | 0 (0%) | 45 (100%)       | 45   |
| 1 | 1 | _B5 | 1 | 1 | 1 | _E4 | 1 | 1 | _G3 | 1 | 1 | _I5 | 0 (0%) | 0 (0%)          | 0 (0%) | 855<br>(100%)   | 855  |
| 1 | 1 | _B5 | 1 | 1 | 1 | _E4 | 1 | 1 | _G3 | 1 | 1 | _I6 | 0 (0%) | 0 (0%)          | 0 (0%) | 722<br>(100%)   | 722  |

*Supplemental material is neither peer-reviewed nor thoroughly edited by CJASN. The authors alone are responsible for the accuracy and presentation of the material.*

|   |   |     |   |   |   |     |   |   |     |   |   |     |        |              |            |             |     |
|---|---|-----|---|---|---|-----|---|---|-----|---|---|-----|--------|--------------|------------|-------------|-----|
| 1 | 1 | _B5 | 1 | 1 | 1 | _E4 | 1 | 1 | _G4 | . | 1 | _I5 | 0 (0%) | 0 (0%)       | 0 (0%)     | 36 (100%)   | 36  |
| 1 | 1 | _B5 | 1 | 1 | 1 | _E4 | 1 | 1 | _G4 | . | 1 | _I6 | 0 (0%) | 0 (0%)       | 0 (0%)     | 47 (100%)   | 47  |
| 1 | 1 | _B5 | 1 | 1 | 1 | _E4 | 1 | 1 | _G4 | 0 | 0 | _I6 | 0 (0%) | 47 (100%)    | 0 (0%)     | 0 (0%)      | 47  |
| 1 | 1 | _B5 | 1 | 1 | 1 | _E4 | 1 | 1 | _G4 | 0 | 1 | _I5 | 0 (0%) | 0 (0%)       | 0 (0%)     | 36 (100%)   | 36  |
| 1 | 1 | _B5 | 1 | 1 | 1 | _E4 | 1 | 1 | _G4 | 1 | 1 | _I5 | 0 (0%) | 0 (0%)       | 0 (0%)     | 684 (100%)  | 684 |
| 1 | 1 | _B5 | 1 | 1 | 1 | _E4 | 1 | 1 | _G4 | 1 | 1 | _I6 | 0 (0%) | 0 (0%)       | 0 (0%)     | 893 (100%)  | 893 |
| 1 | 1 | _B5 | 1 | 1 | 1 | _E5 | 1 | 1 | _G3 | . | 1 | _I5 | 0 (0%) | 0 (0%)       | 0 (0%)     | 34 (100%)   | 34  |
| 1 | 1 | _B5 | 1 | 1 | 1 | _E5 | 1 | 1 | _G3 | . | 1 | _I6 | 0 (0%) | 0 (0%)       | 0 (0%)     | 49 (100%)   | 49  |
| 1 | 1 | _B5 | 1 | 1 | 1 | _E5 | 1 | 1 | _G3 | 0 | 0 | _I6 | 0 (0%) | 36 (73.469%) | 1 (2.041%) | 12 (24.49%) | 49  |
| 1 | 1 | _B5 | 1 | 1 | 1 | _E5 | 1 | 1 | _G3 | 0 | 1 | _I5 | 0 (0%) | 0 (0%)       | 0 (0%)     | 34 (100%)   | 34  |
| 1 | 1 | _B5 | 1 | 1 | 1 | _E5 | 1 | 1 | _G3 | 1 | 1 | _I5 | 0 (0%) | 0 (0%)       | 0 (0%)     | 646 (100%)  | 646 |
| 1 | 1 | _B5 | 1 | 1 | 1 | _E5 | 1 | 1 | _G3 | 1 | 1 | _I6 | 0 (0%) | 0 (0%)       | 0 (0%)     | 931 (100%)  | 931 |
| 1 | 1 | _B5 | 1 | 1 | 1 | _E5 | 1 | 1 | _G4 | . | 1 | _I5 | 0 (0%) | 0 (0%)       | 0 (0%)     | 49 (100%)   | 49  |
| 1 | 1 | _B5 | 1 | 1 | 1 | _E5 | 1 | 1 | _G4 | . | 1 | _I6 | 0 (0%) | 0 (0%)       | 0 (0%)     | 39 (100%)   | 39  |
| 1 | 1 | _B5 | 1 | 1 | 1 | _E5 | 1 | 1 | _G4 | 0 | 0 | _I6 | 0 (0%) | 39 (100%)    | 0 (0%)     | 0 (0%)      | 39  |
| 1 | 1 | _B5 | 1 | 1 | 1 | _E5 | 1 | 1 | _G4 | 0 | 1 | _I5 | 0 (0%) | 0 (0%)       | 0 (0%)     | 49 (100%)   | 49  |
| 1 | 1 | _B5 | 1 | 1 | 1 | _E5 | 1 | 1 | _G4 | 1 | 1 | _I5 | 0 (0%) | 0 (0%)       | 0 (0%)     | 931 (100%)  | 931 |
| 1 | 1 | _B5 | 1 | 1 | 1 | _E5 | 1 | 1 | _G4 | 1 | 1 | _I6 | 0 (0%) | 0 (0%)       | 0 (0%)     | 741 (100%)  | 741 |

**SUPPLEMENTARY TABLE 6:** Model validation populations

| Variable               |          | Internal (n= 141)   |                 | External (n= 142)  |                 |
|------------------------|----------|---------------------|-----------------|--------------------|-----------------|
|                        |          | No DDAVP<br>(n=119) | DDAVP<br>(n=22) | No DDAVP<br>(n=95) | DDAVP<br>(n=47) |
| Mean Age (SD)          |          | 67 (16.1)           | 63 (16.9)       | 71.4 (15.3)        | 69.6 (15.2)     |
| Mean Corrected Na (SD) |          | 113.0 (2.5)         | 110.6 (5.4)     | 112.5 (3.0)        | 110.4 (3.8)     |
| Vomiting               |          | 43 (36%)            | 12 (55%)        | 31 (33%)           | 31 (66%)        |
| Decreased LOC/Coma     |          | 33 (28%)            | 12 (55%)        | 33 (35%)           | 21 (45%)        |
| Volume Overload        |          | 12 (10%)            | 1 (4%)          | 17 (18%)           | 1 (2%)          |
| K+ < 3.0 mMol          |          | 26 (22%)            | 2 (7%)          | 13 (14%)           | 12 (26%)        |
| Urine Osmolality<150   |          | 16 (13%)            | 5 (23%)         | 4 (4%)             | 10 (21%)        |
| Chest Tumor            |          | 23 (19%)            | 4 (18%)         | 14 (15%)           | 0 (0%)          |
| SHOR Points            | <-3      | 26 (22%)            | 4 (18%)         | 26 (27%)           | 1 (2%)          |
|                        | -3 to -1 | 28 (24%)            | 3 (14%)         | 27 (28%)           | 3 (6%)          |
|                        | 0 to 2   | 31 (26%)            | 4 (18%)         | 31 (32%)           | 17 (36%)        |
|                        | 3 to 4   | 19 (16%)            | 4 (18%)         | 6 (6%)             | 12 (26%)        |
|                        | 5+       | 15 (13%)            | 7 (32%)         | 7 (7%)             | 14 (30%)        |
| Overcorrection Status  | No       | 67 (56%)            | 12 (54%)        | 72 (76%)           | 33 (70%)        |
|                        | Unlikely | 22 (18%)            | 2 (9%)          | 4 (4%)             | 8 (17%)         |
|                        | Possible | 19 (16%)            | 5 (23%)         | 10 (10%)           | 5 (11%)         |
|                        | Definite | 11 (9%)             | 3 (14%)         | 9 (9%)             | 1 (2%)          |

Data from patients at neither the derivation hospital (n=141) nor the external hospital (n=142) were used to create the SHOR model.
